# Supplementary material for: Identifying Cell-Type Specific Genes and Expression Rules Based on Single-Cell Transcriptomic Atlas Data
Source: Front Bioeng Biotechnol. 2020 Apr 29;8:350. doi: 10.3389/fbioe.2020.00350 (PMC7201067; doi:10.3389/fbioe.2020.00350)
Supplement: Supplementary file 3 [file Table_3.XLSX]

## Sheet: Sheet1
Table S3. Performance of RF with different numbers of features ranked using mRMR.
Number of features	Bladder	Brain Microglia	Brain Neurons	Colon	Fat	Heart	Kidney	Liver	Lung	Mammary	Marrow	Muscle	Pancreas	Skin	Spleen	Thymus	Tongue	Trachea	Overall accuracy	MCC
5	0.471917	0.925661	0.493188	0.91034	0.074548	0.173577	0.347977	0.100917	0.023921	0.460759	0.043697	0.031874	0.062213	0.623377	0.023865	0.144937	0.706006	0.234364	0.348382	0.308717
10	0.607448	0.942461	0.36696	0.930586	0.142784	0.222909	0.382659	0.392457	0.221529	0.657529	0.296545	0.182683	0.216216	0.833198	0.488941	0.505063	0.84567	0.343638	0.45692	0.423617
15	0.631868	0.943091	0.320228	0.939986	0.203344	0.269993	0.384971	0.453619	0.278211	0.708599	0.443137	0.239772	0.652218	0.885552	0.562282	0.55	0.905028	0.426312	0.514472	0.484212
20	0.69475	0.945611	0.47284	0.943842	0.268509	0.40773	0.43237	0.543323	0.388976	0.741269	0.460691	0.645576	0.658338	0.902597	0.577998	0.572152	0.935754	0.512581	0.589509	0.56153
25	0.69536	0.946031	0.491981	0.947216	0.28335	0.444132	0.43815	0.552497	0.394696	0.740143	0.514472	0.653663	0.671596	0.905844	0.653085	0.635443	0.939944	0.534148	0.60997	0.582895
30	0.741758	0.946241	0.545784	0.952278	0.304333	0.516374	0.544509	0.625892	0.485699	0.775066	0.607843	0.70314	0.72769	0.911932	0.697322	0.668354	0.941341	0.639109	0.656176	0.631752
35	0.757631	0.946661	0.557855	0.953242	0.316104	0.524666	0.542197	0.627931	0.50494	0.775066	0.612325	0.709324	0.73126	0.924513	0.709546	0.681646	0.951816	0.636233	0.663523	0.639609
40	0.749695	0.947081	0.574754	0.954206	0.322927	0.539986	0.56185	0.64526	0.5091	0.775441	0.645378	0.720266	0.737889	0.925325	0.723516	0.705063	0.952514	0.65133	0.67433	0.650868
45	0.777778	0.947501	0.648733	0.953724	0.371204	0.56402	0.608092	0.673802	0.542382	0.779947	0.651727	0.762607	0.768995	0.950487	0.766589	0.743671	0.986732	0.69734	0.703478	0.681619
50	0.819902	0.947711	0.670805	0.952037	0.417093	0.594659	0.619653	0.698267	0.603224	0.805483	0.667414	0.777355	0.772055	0.950081	0.797439	0.84557	0.985335	0.751977	0.727753	0.707657
55	0.810745	0.948341	0.680462	0.95517	0.428864	0.603233	0.635838	0.714577	0.634945	0.802103	0.694678	0.773549	0.780724	0.95414	0.814901	0.855696	0.98743	0.766355	0.737109	0.717647
60	0.813187	0.948131	0.691843	0.957821	0.429205	0.616444	0.647399	0.738022	0.629225	0.814495	0.705322	0.773549	0.786334	0.95414	0.826542	0.861392	0.98743	0.762761	0.743118	0.724003
65	0.821734	0.949391	0.713744	0.958544	0.449505	0.639213	0.654335	0.738022	0.670307	0.815997	0.715966	0.790676	0.795003	0.955357	0.82305	0.864557	0.986732	0.757009	0.754706	0.736356
70	0.831502	0.947921	0.727539	0.958303	0.452064	0.652424	0.667052	0.748216	0.667707	0.815997	0.727358	0.784491	0.791943	0.954545	0.834109	0.874051	0.986732	0.77642	0.760547	0.742583
75	0.843101	0.947921	0.729953	0.959267	0.469806	0.658327	0.693642	0.749235	0.691108	0.817499	0.740616	0.794006	0.794493	0.956575	0.835274	0.868987	0.988128	0.78289	0.767281	0.749765
80	0.884005	0.948131	0.740472	0.959267	0.572671	0.692059	0.692486	0.746177	0.693188	0.816373	0.777778	0.795433	0.803672	0.954545	0.860303	0.893671	0.988128	0.80949	0.791518	0.775316
85	0.880952	0.947711	0.746163	0.958785	0.573354	0.698946	0.714451	0.737003	0.690068	0.82914	0.777778	0.80019	0.811831	0.956169	0.86787	0.889241	0.988827	0.812365	0.79442	0.778461
90	0.882784	0.948551	0.758752	0.959267	0.584101	0.726072	0.723699	0.755352	0.722829	0.84003	0.780392	0.807326	0.8205	0.958198	0.856228	0.893671	0.989525	0.826024	0.803981	0.788624
95	0.893773	0.948341	0.772547	0.959026	0.579495	0.734364	0.74104	0.769623	0.712949	0.841157	0.795518	0.806851	0.824069	0.95901	0.870198	0.896835	0.989525	0.829619	0.808891	0.793929
100	0.89072	0.948761	0.774271	0.959026	0.578642	0.736191	0.753757	0.775739	0.728549	0.84003	0.791597	0.810657	0.81948	0.957792	0.871362	0.897468	0.988827	0.838246	0.809784	0.79491
105	0.888889	0.948341	0.78617	0.95999	0.579324	0.739283	0.750289	0.772681	0.723349	0.843785	0.794024	0.809705	0.827639	0.958198	0.877183	0.901266	0.989525	0.838965	0.812277	0.797595
110	0.893162	0.947711	0.783066	0.95999	0.583589	0.74884	0.743353	0.769623	0.725429	0.841532	0.79141	0.807802	0.826619	0.958198	0.875437	0.900633	0.990922	0.842559	0.813225	0.798654
115	0.885226	0.948971	0.792206	0.958785	0.584272	0.745327	0.745665	0.79001	0.724389	0.841532	0.791597	0.812084	0.826619	0.957792	0.885332	0.894304	0.988128	0.841121	0.814156	0.799715
120	0.89011	0.948341	0.790309	0.958785	0.580519	0.744905	0.750289	0.779817	0.727509	0.835899	0.794398	0.814938	0.828659	0.957386	0.878929	0.894937	0.988827	0.84184	0.813597	0.799102
125	0.894994	0.948131	0.803587	0.959508	0.584101	0.740689	0.744509	0.787971	0.737389	0.844912	0.792157	0.812559	0.825599	0.957386	0.885332	0.900633	0.990223	0.851186	0.816127	0.801863
130	0.898657	0.948341	0.814451	0.958544	0.586148	0.751651	0.759538	0.782875	0.75559	0.849793	0.796078	0.808278	0.833758	0.959821	0.892899	0.9	0.989525	0.849748	0.820871	0.80697
135	0.907204	0.948761	0.811692	0.959508	0.590583	0.754322	0.758382	0.79001	0.74675	0.85092	0.800373	0.807802	0.834778	0.958198	0.895227	0.902532	0.990223	0.851905	0.822228	0.808407
140	0.899267	0.949391	0.81652	0.959749	0.600989	0.758679	0.766474	0.793068	0.75039	0.849793	0.795518	0.817317	0.840898	0.958198	0.892317	0.902532	0.990223	0.863408	0.82487	0.811254
145	0.90232	0.949181	0.818417	0.958785	0.601672	0.760506	0.758382	0.804281	0.75091	0.84754	0.800373	0.821123	0.839368	0.958604	0.89057	0.894304	0.992318	0.857656	0.825577	0.811952
150	0.896825	0.948971	0.821349	0.959026	0.599966	0.761771	0.775723	0.805301	0.765471	0.852047	0.796639	0.81922	0.831209	0.958198	0.898719	0.901266	0.988827	0.856937	0.826339	0.812861
155	0.907814	0.949181	0.82359	0.960713	0.60406	0.773577	0.775723	0.80632	0.784191	0.859181	0.802614	0.826356	0.852626	0.958604	0.889988	0.906329	0.990223	0.864845	0.831901	0.818848
160	0.908425	0.949181	0.821004	0.958544	0.604742	0.781307	0.786127	0.811417	0.776911	0.858806	0.8	0.828259	0.859255	0.957792	0.896391	0.907595	0.99162	0.867002	0.832906	0.819966
165	0.903541	0.949181	0.826004	0.960713	0.603207	0.779199	0.797688	0.80632	0.788872	0.858055	0.794024	0.82921	0.859255	0.957792	0.89057	0.90443	0.990922	0.872035	0.832775	0.819841
170	0.908425	0.948761	0.826177	0.961195	0.602695	0.783837	0.789595	0.813456	0.795112	0.856553	0.793651	0.82255	0.855176	0.957792	0.895809	0.905063	0.99162	0.865564	0.83324	0.82036
175	0.907204	0.950021	0.834454	0.959749	0.619584	0.779339	0.787283	0.816514	0.798752	0.857304	0.796825	0.834443	0.856706	0.957386	0.899884	0.900633	0.990922	0.863408	0.836272	0.823586
180	0.912088	0.949181	0.838076	0.961436	0.620096	0.785383	0.79422	0.828746	0.795632	0.859181	0.801681	0.837774	0.859765	0.956981	0.902794	0.908228	0.99162	0.870597	0.839267	0.826806
185	0.909646	0.950231	0.840145	0.960713	0.617366	0.785102	0.804624	0.824669	0.790432	0.856928	0.801494	0.83254	0.852626	0.957386	0.910943	0.903797	0.990922	0.872753	0.838616	0.826144
190	0.91453	0.949601	0.844111	0.961678	0.61856	0.789318	0.798844	0.821611	0.810192	0.856928	0.800187	0.841579	0.860275	0.956981	0.914435	0.905063	0.990223	0.867002	0.840923	0.828655
195	0.906593	0.949601	0.842904	0.960472	0.619584	0.786929	0.801156	0.819572	0.795112	0.859557	0.797012	0.830637	0.859255	0.95901	0.917346	0.908861	0.990922	0.877067	0.839639	0.827275
200	0.910867	0.950021	0.842904	0.960231	0.622654	0.794519	0.804624	0.827727	0.797712	0.85843	0.803735	0.834919	0.863335	0.958198	0.916182	0.908228	0.99162	0.872035	0.84215	0.829991
205	0.913919	0.950021	0.845835	0.960954	0.625043	0.798735	0.803468	0.834862	0.794592	0.855051	0.805042	0.833968	0.860275	0.95901	0.917928	0.908861	0.990922	0.870597	0.843304	0.831198
210	0.911477	0.949811	0.873599	0.962642	0.627943	0.806606	0.804624	0.828746	0.804472	0.855802	0.805229	0.846337	0.869964	0.957386	0.916182	0.90443	0.990922	0.878505	0.848791	0.837165
215	0.912088	0.949811	0.879979	0.96216	0.625213	0.810119	0.811561	0.825688	0.809152	0.858055	0.801307	0.841579	0.867415	0.95901	0.920256	0.906962	0.990223	0.875629	0.849479	0.837926
220	0.905983	0.949601	0.884808	0.960954	0.626919	0.818412	0.828902	0.834862	0.810192	0.859932	0.805415	0.839676	0.875064	0.95901	0.916764	0.911392	0.990922	0.879942	0.852325	0.840967
225	0.906593	0.950231	0.889809	0.961195	0.630843	0.815741	0.82659	0.83792	0.813313	0.860308	0.802241	0.835871	0.880163	0.957386	0.925495	0.908228	0.990922	0.872753	0.852827	0.841537
230	0.909646	0.949391	0.89274	0.961919	0.629478	0.822347	0.83237	0.832824	0.817993	0.853549	0.799813	0.840628	0.881693	0.958198	0.91851	0.91519	0.992318	0.875629	0.853906	0.842709
235	0.911477	0.949601	0.894292	0.961678	0.624019	0.821223	0.820809	0.828746	0.802392	0.858806	0.795892	0.849667	0.876594	0.959821	0.914435	0.901899	0.990922	0.872035	0.852028	0.840682
240	0.905983	0.949811	0.895672	0.960713	0.631866	0.821504	0.823121	0.821611	0.807072	0.856553	0.801494	0.84824	0.881693	0.95901	0.916182	0.913924	0.99162	0.874191	0.853943	0.842725
245	0.908425	0.950231	0.902914	0.961919	0.631184	0.832186	0.818497	0.832824	0.807072	0.863688	0.800934	0.84491	0.884243	0.958198	0.916182	0.909494	0.990223	0.882099	0.856659	0.845711
250	0.910867	0.950651	0.905673	0.96216	0.628625	0.825439	0.817341	0.836901	0.818513	0.864814	0.797012	0.84491	0.884753	0.959416	0.916182	0.910759	0.989525	0.869878	0.855822	0.844792
255	0.912088	0.950231	0.905501	0.963124	0.632378	0.825439	0.833526	0.843017	0.819033	0.862186	0.804295	0.848716	0.881693	0.958604	0.912107	0.907595	0.99162	0.880661	0.857385	0.846466
260	0.909646	0.949811	0.902914	0.96216	0.643125	0.827126	0.843931	0.846075	0.821113	0.867443	0.801307	0.84824	0.883733	0.958604	0.920838	0.91519	0.990922	0.875629	0.858984	0.848182
265	0.913309	0.951071	0.906363	0.962401	0.63886	0.828953	0.831214	0.844037	0.809672	0.86932	0.802614	0.8549	0.887302	0.959416	0.927823	0.917089	0.990223	0.879942	0.859747	0.849021
270	0.918803	0.949601	0.905846	0.962883	0.635278	0.831202	0.83237	0.840979	0.825793	0.867443	0.801681	0.850143	0.888322	0.957792	0.915017	0.913291	0.99162	0.882099	0.859375	0.848644
275	0.911477	0.949811	0.910329	0.961919	0.638349	0.829937	0.841618	0.845056	0.816953	0.868945	0.805042	0.857279	0.886792	0.95901	0.929569	0.912658	0.992318	0.879224	0.860733	0.850118
280	0.91453	0.950021	0.917227	0.961919	0.637155	0.833732	0.850867	0.841998	0.827353	0.874578	0.808777	0.855852	0.891892	0.959416	0.937718	0.920886	0.990922	0.879224	0.86369	0.853314
285	0.915751	0.950441	0.917572	0.963124	0.63596	0.834856	0.853179	0.845056	0.820593	0.872324	0.80859	0.855852	0.890362	0.959821	0.920838	0.917722	0.990223	0.877786	0.862909	0.852442
290	0.916972	0.949601	0.918262	0.961436	0.640566	0.834153	0.848555	0.859327	0.815913	0.871949	0.808217	0.854424	0.891892	0.95901	0.926659	0.921519	0.990922	0.888569	0.863746	0.853327
295	0.909035	0.950861	0.916365	0.96216	0.638519	0.840337	0.846243	0.857288	0.829433	0.870822	0.80747	0.853473	0.893932	0.95901	0.927241	0.913924	0.989525	0.889288	0.864156	0.853811
300	0.91514	0.949181	0.915848	0.962642	0.633743	0.837526	0.856647	0.862385	0.828393	0.870447	0.802241	0.855852	0.892912	0.958604	0.928987	0.924051	0.989525	0.887132	0.8633	0.852918
305	0.921245	0.949181	0.915158	0.962642	0.645684	0.834153	0.861272	0.859327	0.827873	0.871949	0.805602	0.859657	0.898011	0.960633	0.931315	0.918354	0.988827	0.88138	0.864844	0.854539
310	0.920024	0.949811	0.91671	0.961436	0.649096	0.835559	0.852023	0.850153	0.828393	0.871198	0.80915	0.856327	0.894952	0.961851	0.924331	0.918987	0.992318	0.882099	0.865234	0.854923
315	0.918803	0.949811	0.918434	0.963365	0.653361	0.841883	0.862428	0.853211	0.834633	0.873075	0.806536	0.853473	0.894952	0.961445	0.92142	0.91962	0.99162	0.892164	0.86715	0.856975
320	0.918193	0.949811	0.918262	0.963606	0.648755	0.842024	0.857803	0.85525	0.827353	0.873827	0.802801	0.855376	0.896481	0.959821	0.923749	0.922785	0.989525	0.884975	0.865997	0.855758
325	0.911477	0.949181	0.917744	0.963365	0.649266	0.842446	0.85896	0.861366	0.828393	0.868194	0.802988	0.852046	0.892402	0.95901	0.930151	0.910759	0.989525	0.882818	0.86516	0.854848
330	0.916361	0.950231	0.919986	0.963124	0.652337	0.840197	0.853179	0.85423	0.827353	0.870071	0.803361	0.854424	0.890362	0.959416	0.927241	0.916456	0.990922	0.882099	0.865662	0.855388
335	0.915751	0.949181	0.918779	0.962642	0.650972	0.843992	0.868208	0.863405	0.832033	0.870447	0.800747	0.855852	0.890872	0.959416	0.923749	0.924684	0.989525	0.88785	0.866388	0.856214
340	0.91453	0.948971	0.91602	0.962642	0.64739	0.841602	0.856647	0.869521	0.832553	0.873075	0.799627	0.860133	0.890872	0.958604	0.93248	0.917089	0.989525	0.892164	0.865588	0.85539
345	0.912698	0.949391	0.920504	0.962642	0.647219	0.850457	0.865896	0.861366	0.830993	0.86932	0.801307	0.858706	0.899541	0.960227	0.927241	0.918354	0.989525	0.887132	0.867206	0.857133
350	0.913919	0.948971	0.920159	0.963606	0.649266	0.844413	0.855491	0.863405	0.832033	0.864814	0.799627	0.854424	0.891382	0.961445	0.929569	0.915823	0.990922	0.885694	0.865774	0.855569
355	0.91514	0.950861	0.922745	0.963124	0.656772	0.847224	0.86474	0.860347	0.835673	0.870447	0.802614	0.852997	0.890872	0.95901	0.924331	0.920253	0.990922	0.884975	0.867969	0.857888
360	0.91514	0.949601	0.923263	0.963124	0.656431	0.844694	0.850867	0.862385	0.830993	0.869696	0.804295	0.858706	0.894442	0.957792	0.916764	0.91962	0.990922	0.884256	0.867336	0.857157
365	0.916361	0.949811	0.921538	0.963606	0.660184	0.846381	0.876301	0.850153	0.836193	0.865941	0.80056	0.852997	0.896481	0.961039	0.920256	0.927848	0.990922	0.889288	0.868173	0.858093
370	0.91453	0.950861	0.92447	0.963124	0.655578	0.849754	0.871676	0.867482	0.835673	0.866692	0.797199	0.853473	0.895971	0.95901	0.923749	0.922785	0.990922	0.893602	0.868341	0.858292
375	0.91514	0.949811	0.922745	0.962642	0.660525	0.849192	0.868208	0.866463	0.831513	0.871198	0.797572	0.849667	0.894952	0.960227	0.924913	0.915823	0.99162	0.88785	0.868118	0.858039
380	0.909646	0.950651	0.924125	0.961919	0.657114	0.850878	0.872832	0.860347	0.839834	0.873451	0.80112	0.856327	0.892912	0.961851	0.934226	0.918987	0.990223	0.895758	0.869513	0.859566
385	0.918803	0.950231	0.921366	0.962642	0.670078	0.845819	0.879769	0.87054	0.837754	0.866692	0.798506	0.853949	0.895971	0.959416	0.924913	0.925949	0.990922	0.890007	0.869568	0.85958
390	0.913919	0.949181	0.921538	0.962883	0.665814	0.847505	0.87052	0.856269	0.830993	0.867443	0.803922	0.85157	0.888832	0.960633	0.928987	0.926582	0.99162	0.891445	0.868955	0.858911
395	0.91453	0.949811	0.92516	0.962642	0.662402	0.849754	0.875145	0.863405	0.833593	0.867067	0.804108	0.862988	0.896991	0.961039	0.934226	0.918987	0.99162	0.888569	0.870257	0.860375
400	0.91453	0.949391	0.92516	0.961678	0.662573	0.855657	0.876301	0.861366	0.832553	0.868945	0.79888	0.85157	0.891382	0.959416	0.93539	0.927215	0.990223	0.894321	0.870126	0.860264
405	0.91453	0.950441	0.924297	0.961919	0.661378	0.850878	0.873988	0.863405	0.832033	0.871573	0.801867	0.862512	0.890362	0.960227	0.939464	0.917722	0.990922	0.891445	0.870015	0.860118
410	0.907814	0.949811	0.922918	0.96216	0.666325	0.852284	0.873988	0.866463	0.839834	0.865565	0.802428	0.859657	0.893932	0.958604	0.937136	0.91519	0.99162	0.894321	0.870331	0.860467
415	0.91514	0.950441	0.923952	0.961919	0.664278	0.850457	0.879769	0.867482	0.828913	0.866316	0.802614	0.861085	0.890872	0.959416	0.930733	0.920253	0.989525	0.893602	0.869866	0.859941
420	0.916361	0.950651	0.926712	0.962883	0.664278	0.852846	0.879769	0.87054	0.834113	0.86932	0.803175	0.8549	0.891892	0.95901	0.936554	0.923418	0.990223	0.886413	0.870945	0.861134
425	0.916972	0.949601	0.92309	0.962401	0.663767	0.852424	0.876301	0.863405	0.835153	0.867067	0.797012	0.861085	0.893422	0.960633	0.934808	0.921519	0.990922	0.88138	0.869606	0.859682
430	0.912698	0.949811	0.926712	0.962401	0.657455	0.855376	0.869364	0.874618	0.834633	0.86519	0.800187	0.855852	0.895461	0.960633	0.939464	0.920253	0.990922	0.897196	0.870275	0.860452
435	0.912088	0.949391	0.925677	0.963124	0.662231	0.852846	0.876301	0.872579	0.840874	0.868945	0.799253	0.858706	0.893932	0.959416	0.941793	0.924684	0.992318	0.886413	0.870703	0.860917
440	0.913919	0.949811	0.927574	0.963847	0.659161	0.849051	0.873988	0.874618	0.833593	0.868194	0.797199	0.856803	0.895971	0.960227	0.931898	0.91962	0.990922	0.89504	0.869475	0.859562
445	0.91453	0.949391	0.926884	0.963124	0.660355	0.855376	0.875145	0.867482	0.832553	0.865565	0.801307	0.852997	0.896991	0.960227	0.941211	0.916456	0.990223	0.887132	0.870294	0.860452
450	0.913309	0.949811	0.926712	0.962401	0.656772	0.855657	0.865896	0.872579	0.832033	0.870071	0.797012	0.860609	0.891382	0.958604	0.937136	0.91962	0.990223	0.897915	0.869847	0.860024
455	0.911477	0.948551	0.925849	0.963124	0.659672	0.852706	0.873988	0.87054	0.836193	0.86519	0.799253	0.85823	0.896991	0.959821	0.940047	0.918987	0.990922	0.88785	0.869792	0.85996
460	0.915751	0.949181	0.928091	0.962883	0.664108	0.851581	0.875145	0.868502	0.834113	0.868945	0.795892	0.8549	0.889852	0.960633	0.939464	0.918354	0.990922	0.89504	0.870089	0.860268
465	0.915751	0.949601	0.926194	0.962883	0.662402	0.856079	0.867052	0.868502	0.834113	0.866692	0.801867	0.85823	0.896481	0.958604	0.934808	0.91962	0.989525	0.895758	0.870833	0.861027
470	0.913919	0.950021	0.929298	0.963124	0.654043	0.857765	0.862428	0.874618	0.828393	0.865941	0.797572	0.855852	0.896991	0.958604	0.936554	0.922152	0.990223	0.892883	0.869847	0.860023
475	0.913309	0.948971	0.926022	0.961919	0.655578	0.851581	0.871676	0.867482	0.836713	0.868569	0.799066	0.859182	0.894442	0.960633	0.935972	0.918354	0.990922	0.889288	0.869159	0.859231
480	0.920635	0.949601	0.927056	0.963365	0.65319	0.854814	0.880925	0.864424	0.834113	0.870822	0.79888	0.86156	0.892912	0.960227	0.935972	0.918354	0.988827	0.891445	0.86994	0.860143
485	0.912698	0.950021	0.928608	0.963124	0.656943	0.855095	0.879769	0.872579	0.824753	0.865565	0.797946	0.860609	0.898521	0.959821	0.930733	0.91962	0.990922	0.89504	0.86994	0.860094
490	0.923077	0.949391	0.928781	0.963847	0.657796	0.854814	0.882081	0.864424	0.833593	0.864814	0.799066	0.853949	0.899541	0.959416	0.933644	0.916456	0.990922	0.890007	0.870238	0.860412
495	0.913919	0.948341	0.93223	0.96457	0.661378	0.857063	0.879769	0.864424	0.833593	0.868569	0.80056	0.862512	0.902601	0.961039	0.940047	0.913291	0.990922	0.892883	0.871987	0.862302
500	0.913919	0.948131	0.928608	0.963606	0.659843	0.855798	0.873988	0.87054	0.836193	0.871198	0.796078	0.860609	0.896481	0.961445	0.939464	0.914557	0.993017	0.897196	0.870871	0.861122
505	0.916361	0.948971	0.927229	0.963124	0.659331	0.857063	0.873988	0.867482	0.831513	0.864439	0.796639	0.864415	0.901581	0.960227	0.937718	0.91519	0.989525	0.890726	0.870424	0.86064
510	0.912698	0.950231	0.930505	0.961678	0.660867	0.856641	0.883237	0.869521	0.832553	0.866316	0.793277	0.852997	0.899031	0.960227	0.947031	0.921519	0.990922	0.892164	0.870778	0.861038
515	0.915751	0.949181	0.928781	0.963124	0.659331	0.854814	0.885549	0.863405	0.841914	0.867818	0.796825	0.859657	0.900561	0.960633	0.940047	0.917089	0.990223	0.891445	0.870926	0.861162
520	0.917582	0.949601	0.930505	0.962401	0.688332	0.857063	0.887861	0.860347	0.836193	0.868945	0.797012	0.860609	0.899031	0.961039	0.944703	0.924051	0.990922	0.898634	0.875019	0.865467
525	0.913919	0.949601	0.928436	0.962883	0.686626	0.854814	0.886705	0.863405	0.840874	0.869696	0.800747	0.859182	0.900561	0.95901	0.942375	0.917722	0.99162	0.897915	0.874498	0.8649
530	0.912698	0.950231	0.930678	0.96216	0.690208	0.854814	0.883237	0.867482	0.835153	0.867818	0.80112	0.861085	0.901071	0.959821	0.942957	0.918987	0.99162	0.900791	0.875112	0.865531
535	0.916972	0.948761	0.931712	0.964088	0.684749	0.858046	0.878613	0.866463	0.836713	0.866692	0.796265	0.860609	0.900051	0.961445	0.940047	0.920253	0.990223	0.888569	0.874237	0.864648
540	0.913919	0.948341	0.930505	0.962883	0.685773	0.858609	0.877457	0.865443	0.839834	0.870822	0.801681	0.857755	0.899031	0.959416	0.942375	0.921519	0.99162	0.900791	0.875112	0.865594
545	0.916361	0.949601	0.931195	0.962883	0.686285	0.857906	0.879769	0.868502	0.843474	0.864439	0.8	0.859657	0.901071	0.959416	0.940629	0.925316	0.989525	0.892164	0.875	0.865438
550	0.917582	0.949601	0.932919	0.962401	0.690549	0.858046	0.889017	0.866463	0.842434	0.868569	0.798506	0.85823	0.901071	0.959821	0.942375	0.920253	0.990223	0.897196	0.875818	0.86634
555	0.912088	0.950021	0.93016	0.962883	0.688502	0.854392	0.880925	0.869521	0.836193	0.867067	0.802988	0.86156	0.904131	0.960633	0.945867	0.920253	0.99162	0.896477	0.875205	0.865648
560	0.917582	0.950441	0.931195	0.963606	0.686626	0.855376	0.878613	0.868502	0.834633	0.868945	0.802614	0.859182	0.900561	0.958604	0.9383	0.922152	0.99162	0.900791	0.875056	0.865509
565	0.917582	0.950021	0.928781	0.96216	0.684067	0.858468	0.883237	0.881753	0.842954	0.865565	0.798506	0.861085	0.896991	0.960227	0.948778	0.918354	0.990922	0.900791	0.875037	0.86552
570	0.919414	0.950651	0.931367	0.961195	0.681849	0.859171	0.878613	0.87156	0.836713	0.86932	0.804108	0.857755	0.902091	0.958604	0.940629	0.932278	0.990922	0.891445	0.875353	0.865817
575	0.909035	0.949601	0.928608	0.962401	0.689014	0.856781	0.886705	0.869521	0.839834	0.86932	0.80112	0.863939	0.901581	0.959416	0.939464	0.929114	0.990223	0.900072	0.875446	0.865931
580	0.91514	0.948971	0.929988	0.963124	0.686114	0.858749	0.882081	0.868502	0.832033	0.865941	0.802241	0.857279	0.903111	0.960227	0.939464	0.917722	0.990922	0.897196	0.87474	0.865171
585	0.913309	0.949811	0.931195	0.962642	0.68492	0.858187	0.886705	0.873598	0.831513	0.867443	0.804669	0.850618	0.900561	0.958604	0.938882	0.921519	0.990922	0.894321	0.874702	0.865119
590	0.913919	0.950021	0.929815	0.960954	0.681337	0.857625	0.885549	0.873598	0.839834	0.868945	0.802241	0.854424	0.900051	0.95901	0.941793	0.921519	0.990223	0.897196	0.874405	0.864836
595	0.918193	0.949601	0.93085	0.963124	0.68492	0.860014	0.893642	0.877676	0.833593	0.870447	0.803922	0.856803	0.898521	0.960633	0.939464	0.924684	0.990223	0.902229	0.875967	0.8665
600	0.913309	0.950441	0.936023	0.962883	0.685261	0.853689	0.883237	0.872579	0.840874	0.866316	0.800187	0.856803	0.904131	0.959821	0.943539	0.915823	0.99162	0.902948	0.875149	0.865605
605	0.913309	0.948971	0.933264	0.96216	0.686796	0.858468	0.890173	0.876656	0.832553	0.868569	0.805229	0.857755	0.9128	0.958604	0.934226	0.922785	0.992318	0.898634	0.876079	0.866617
610	0.911477	0.948551	0.934816	0.962401	0.683043	0.857625	0.890173	0.87156	0.841914	0.867443	0.803175	0.8549	0.91178	0.960227	0.940047	0.91962	0.988827	0.898634	0.875558	0.866072
615	0.911477	0.949601	0.932747	0.961919	0.688332	0.858187	0.882081	0.863405	0.837233	0.86932	0.8	0.8549	0.915859	0.958198	0.938882	0.921519	0.992318	0.89504	0.875446	0.865909
620	0.915751	0.948971	0.933782	0.962401	0.681167	0.854954	0.879769	0.857288	0.832033	0.868194	0.803361	0.857279	0.914329	0.959416	0.941793	0.918987	0.988827	0.895758	0.874442	0.864873
625	0.920635	0.948971	0.935161	0.961919	0.687308	0.858468	0.890173	0.869521	0.839314	0.868569	0.802988	0.853949	0.91127	0.959416	0.940047	0.912658	0.990223	0.89504	0.876004	0.866539
630	0.916361	0.950231	0.929815	0.96216	0.687479	0.859311	0.878613	0.868502	0.839834	0.868945	0.800934	0.857755	0.915859	0.95901	0.940629	0.91962	0.990223	0.898634	0.8758	0.866326
635	0.912698	0.949181	0.934644	0.961436	0.684408	0.863387	0.892486	0.866463	0.835673	0.859932	0.798693	0.86156	0.917389	0.959416	0.945285	0.920253	0.990922	0.902229	0.876135	0.866718
640	0.905983	0.949601	0.936196	0.961678	0.684579	0.853549	0.872832	0.872579	0.844514	0.868194	0.80112	0.860133	0.91331	0.95901	0.940047	0.920886	0.992318	0.90151	0.875279	0.865788
645	0.91453	0.948971	0.934299	0.961436	0.695838	0.859452	0.883237	0.865443	0.842954	0.865941	0.802988	0.85823	0.916879	0.957792	0.947031	0.920253	0.99162	0.899353	0.877455	0.868079
650	0.916972	0.948761	0.931885	0.96216	0.684579	0.859592	0.891329	0.87156	0.837233	0.864063	0.801307	0.85823	0.915859	0.958198	0.941211	0.918987	0.99162	0.899353	0.875632	0.866148
655	0.91514	0.950231	0.935334	0.961919	0.687308	0.863528	0.880925	0.87156	0.841394	0.865941	0.804295	0.861085	0.916369	0.959821	0.944121	0.913924	0.989525	0.897915	0.877307	0.867975
660	0.910867	0.949811	0.933954	0.96216	0.692085	0.860857	0.879769	0.87054	0.840354	0.864439	0.801494	0.85823	0.916369	0.959416	0.948196	0.920886	0.99162	0.897196	0.87699	0.867599
665	0.912698	0.949391	0.936886	0.96216	0.696008	0.855095	0.880925	0.863405	0.840354	0.866316	0.800747	0.862988	0.91331	0.959821	0.948196	0.918354	0.990922	0.904385	0.877083	0.867679
670	0.911477	0.949181	0.936541	0.961678	0.688673	0.854814	0.887861	0.861366	0.842434	0.865565	0.802241	0.855852	0.91331	0.957792	0.948196	0.915823	0.989525	0.902948	0.875856	0.866384
675	0.910867	0.948971	0.933092	0.962642	0.688502	0.860998	0.884393	0.87156	0.839314	0.865565	0.802801	0.863463	0.918409	0.958198	0.9383	0.917722	0.990223	0.892883	0.876395	0.866965
680	0.912088	0.950651	0.934989	0.961678	0.692767	0.857906	0.882081	0.87054	0.838274	0.868194	0.801867	0.853949	0.914329	0.958604	0.945285	0.917722	0.989525	0.902948	0.876674	0.867262
685	0.910867	0.949391	0.936196	0.962642	0.696179	0.858046	0.890173	0.867482	0.837233	0.862186	0.802428	0.860609	0.919429	0.959821	0.947614	0.920253	0.989525	0.90151	0.87753	0.868172
690	0.91453	0.949391	0.938438	0.960954	0.69362	0.855517	0.889017	0.879715	0.840874	0.862937	0.798133	0.859182	0.91331	0.958604	0.945867	0.923418	0.990223	0.90151	0.876804	0.867391
695	0.910256	0.949811	0.935506	0.961436	0.691232	0.862403	0.882081	0.865443	0.843994	0.870447	0.801307	0.863939	0.914329	0.95901	0.949942	0.917722	0.990223	0.902948	0.877753	0.86844
700	0.906593	0.948131	0.936713	0.963124	0.691232	0.859733	0.882081	0.873598	0.838274	0.867067	0.799627	0.858706	0.916369	0.960227	0.947614	0.910127	0.990223	0.902948	0.876637	0.867233
705	0.913309	0.950441	0.9393	0.96216	0.698226	0.859311	0.887861	0.880734	0.838794	0.867067	0.80056	0.861085	0.922998	0.95901	0.942957	0.917089	0.990922	0.902948	0.878646	0.869362
710	0.916972	0.949811	0.936196	0.962642	0.692938	0.859171	0.892486	0.864424	0.839314	0.867443	0.802801	0.852046	0.923508	0.958198	0.946449	0.918987	0.988827	0.90798	0.877716	0.86838
715	0.915751	0.948761	0.939817	0.961919	0.695667	0.863106	0.887861	0.873598	0.840874	0.868194	0.799813	0.859657	0.920959	0.959416	0.944121	0.918354	0.99162	0.905104	0.878795	0.869566
720	0.907814	0.948971	0.938783	0.961919	0.69089	0.866058	0.889017	0.85423	0.839834	0.871573	0.802054	0.860609	0.925548	0.958604	0.941793	0.91519	0.989525	0.903666	0.878255	0.868985
725	0.916972	0.949601	0.937575	0.962883	0.692938	0.85889	0.886705	0.872579	0.834633	0.863688	0.799813	0.861085	0.924018	0.958604	0.948196	0.917089	0.989525	0.900072	0.877437	0.868084
730	0.916361	0.950651	0.940679	0.960954	0.691573	0.863106	0.895954	0.867482	0.838794	0.868945	0.802054	0.861085	0.920959	0.95901	0.95227	0.920886	0.989525	0.897196	0.878869	0.869636
735	0.913309	0.950021	0.9393	0.960954	0.693961	0.862825	0.887861	0.872579	0.836713	0.867443	0.800934	0.860133	0.924528	0.960633	0.948778	0.917722	0.990223	0.907261	0.878739	0.86949
740	0.916361	0.949601	0.9393	0.960954	0.687137	0.862122	0.90289	0.875637	0.840354	0.868945	0.798693	0.862988	0.925038	0.959821	0.948778	0.918354	0.990223	0.897196	0.878088	0.868841
745	0.909646	0.950231	0.940852	0.961436	0.693449	0.859733	0.892486	0.874618	0.834113	0.86932	0.799066	0.860609	0.921469	0.959821	0.952852	0.924051	0.99162	0.902229	0.878404	0.869138
750	0.910256	0.949391	0.940162	0.960954	0.697032	0.860857	0.887861	0.868502	0.840354	0.868945	0.802801	0.862988	0.924018	0.957386	0.949942	0.918987	0.990223	0.904385	0.879018	0.869773
755	0.917582	0.949601	0.939472	0.96216	0.69089	0.858187	0.890173	0.88787	0.837233	0.870071	0.801681	0.862036	0.918919	0.959416	0.946449	0.918987	0.988827	0.888569	0.87779	0.868469
760	0.913919	0.949601	0.943783	0.960954	0.694473	0.862966	0.889017	0.874618	0.838794	0.86932	0.801867	0.859182	0.922489	0.95901	0.951688	0.917089	0.990922	0.905104	0.879446	0.870282
765	0.912088	0.949601	0.941714	0.960713	0.68799	0.861841	0.891329	0.873598	0.840874	0.867818	0.801494	0.860133	0.923508	0.958604	0.951688	0.920253	0.990922	0.900791	0.878311	0.869071
770	0.91514	0.949811	0.941197	0.962401	0.690038	0.862544	0.894798	0.876656	0.839834	0.870447	0.798319	0.861085	0.925038	0.957792	0.950524	0.915823	0.990223	0.903666	0.878646	0.869441
775	0.913919	0.950231	0.941714	0.961678	0.685943	0.856781	0.899422	0.878695	0.843474	0.866316	0.798506	0.858706	0.921469	0.961445	0.950524	0.920886	0.990223	0.894321	0.877344	0.868017
780	0.916361	0.950021	0.9393	0.961195	0.692596	0.859874	0.891329	0.882773	0.841394	0.866692	0.799066	0.8549	0.926058	0.95901	0.945285	0.922152	0.992318	0.895758	0.878051	0.86875
785	0.916972	0.949601	0.939645	0.96216	0.68799	0.862122	0.887861	0.872579	0.837754	0.870447	0.80056	0.8549	0.929118	0.958198	0.945867	0.922785	0.990922	0.902948	0.878162	0.868904
790	0.915751	0.949391	0.937231	0.96216	0.68782	0.862966	0.887861	0.88685	0.837754	0.867443	0.799813	0.853473	0.924528	0.960227	0.94936	0.911392	0.99162	0.902229	0.877623	0.8683
795	0.918193	0.949601	0.940335	0.961436	0.689185	0.861982	0.885549	0.882773	0.840354	0.871949	0.795705	0.862988	0.924528	0.959416	0.945285	0.920253	0.988827	0.897915	0.878088	0.868819
800	0.915751	0.949601	0.939127	0.961195	0.690038	0.865917	0.891329	0.88787	0.844514	0.871573	0.801307	0.862988	0.925038	0.959821	0.947614	0.917089	0.988827	0.902948	0.879501	0.870332
805	0.919414	0.949181	0.942059	0.960713	0.686285	0.857063	0.885549	0.874618	0.840354	0.865941	0.799253	0.859182	0.920959	0.957792	0.94936	0.917722	0.989525	0.902948	0.877009	0.867648
810	0.921856	0.948971	0.940507	0.960713	0.689355	0.857906	0.883237	0.876656	0.841914	0.866316	0.79944	0.855852	0.920959	0.957792	0.951688	0.918354	0.989525	0.902948	0.8774	0.868081
815	0.909035	0.950651	0.942921	0.961678	0.691573	0.860717	0.892486	0.881753	0.839314	0.867443	0.798319	0.855852	0.927078	0.958604	0.94936	0.917089	0.989525	0.898634	0.878237	0.868966
820	0.916361	0.950021	0.941369	0.961678	0.69072	0.857906	0.887861	0.880734	0.839834	0.871573	0.800934	0.86156	0.926568	0.959821	0.950524	0.913291	0.989525	0.910855	0.878664	0.869422
825	0.919414	0.949811	0.943094	0.961678	0.686626	0.862263	0.885549	0.877676	0.843474	0.870447	0.799813	0.86156	0.920449	0.959416	0.945867	0.916456	0.990922	0.897915	0.87833	0.869085
830	0.923077	0.949181	0.944128	0.961195	0.689185	0.85903	0.889017	0.878695	0.839314	0.86519	0.799066	0.855852	0.920449	0.958604	0.942375	0.922785	0.990223	0.902229	0.877809	0.86851
835	0.919414	0.949391	0.942921	0.961678	0.687649	0.860857	0.885549	0.877676	0.843994	0.866692	0.799627	0.860133	0.922998	0.957792	0.948196	0.920886	0.989525	0.902948	0.878274	0.869041
840	0.921856	0.948761	0.941369	0.961436	0.689355	0.857203	0.883237	0.872579	0.839314	0.867443	0.79888	0.855852	0.927588	0.958198	0.956927	0.918987	0.989525	0.902948	0.877716	0.868423
845	0.919414	0.950231	0.941542	0.961678	0.69089	0.864371	0.894798	0.873598	0.838794	0.869696	0.796825	0.862988	0.923508	0.958198	0.950524	0.922152	0.988827	0.900072	0.878943	0.869741
850	0.909646	0.948971	0.941887	0.962401	0.684237	0.854814	0.889017	0.87054	0.839834	0.870071	0.799066	0.856327	0.928098	0.959821	0.949942	0.91962	0.992318	0.902229	0.876804	0.867464
855	0.913309	0.950021	0.940335	0.962642	0.691743	0.862263	0.89711	0.889908	0.841394	0.865941	0.798319	0.859657	0.925548	0.958198	0.954016	0.922152	0.988827	0.905104	0.879074	0.869905
860	0.907814	0.949391	0.942404	0.962401	0.68219	0.86409	0.891329	0.882773	0.839314	0.86519	0.79944	0.853949	0.920959	0.958604	0.952852	0.924684	0.989525	0.902229	0.877641	0.868383
865	0.915751	0.950441	0.942576	0.962642	0.686967	0.860998	0.889017	0.881753	0.838274	0.870071	0.799813	0.853473	0.919939	0.958198	0.954598	0.915823	0.989525	0.903666	0.878069	0.868825
870	0.909035	0.949811	0.942059	0.962642	0.687649	0.860014	0.894798	0.880734	0.839834	0.866316	0.800747	0.855376	0.922998	0.961445	0.953434	0.922152	0.988128	0.89504	0.877958	0.868696
875	0.916361	0.949601	0.942749	0.961919	0.686285	0.8565	0.892486	0.874618	0.841914	0.868194	0.801681	0.856803	0.922489	0.95901	0.950524	0.91962	0.989525	0.902229	0.87766	0.868365
880	0.918803	0.949391	0.944991	0.962642	0.68782	0.858046	0.901734	0.885831	0.837233	0.866316	0.800747	0.863939	0.923508	0.959821	0.952852	0.917722	0.990922	0.895758	0.878627	0.869402
885	0.913919	0.950021	0.939472	0.96216	0.688161	0.857344	0.898266	0.878695	0.830993	0.871198	0.804482	0.861085	0.924018	0.958604	0.951688	0.91519	0.990223	0.904385	0.877995	0.868709
890	0.921245	0.949391	0.943266	0.962642	0.684237	0.859171	0.895954	0.869521	0.835673	0.867818	0.804855	0.855852	0.927588	0.959416	0.951106	0.918354	0.990223	0.89504	0.878051	0.868787
895	0.910256	0.950021	0.941887	0.960713	0.685261	0.860717	0.893642	0.882773	0.842954	0.871573	0.8	0.858706	0.926058	0.960633	0.951688	0.915823	0.992318	0.897196	0.878125	0.868899
900	0.91514	0.949811	0.945163	0.960954	0.691743	0.858046	0.887861	0.889908	0.842954	0.867067	0.799627	0.857755	0.922998	0.957386	0.952852	0.91519	0.990922	0.905823	0.878664	0.869436
905	0.909646	0.949391	0.940162	0.961436	0.685773	0.855376	0.886705	0.877676	0.842954	0.868194	0.79944	0.85823	0.924018	0.960633	0.954016	0.918354	0.990223	0.898634	0.876879	0.867533
910	0.921856	0.951071	0.943439	0.961678	0.683385	0.860717	0.892486	0.873598	0.839834	0.871198	0.803922	0.856803	0.920449	0.959821	0.94936	0.918987	0.989525	0.902229	0.878441	0.869233
915	0.920635	0.949181	0.942921	0.961919	0.686967	0.858749	0.891329	0.881753	0.839834	0.86932	0.803175	0.857755	0.920959	0.958198	0.952852	0.915823	0.990922	0.90151	0.878311	0.869075
920	0.916972	0.950021	0.942576	0.960713	0.686626	0.858046	0.893642	0.876656	0.841394	0.867818	0.799813	0.853949	0.926058	0.95901	0.954016	0.918354	0.989525	0.899353	0.877697	0.868439
925	0.916972	0.949601	0.944301	0.960472	0.679973	0.856079	0.89711	0.88685	0.839834	0.873451	0.805229	0.861085	0.927588	0.959821	0.952852	0.914557	0.989525	0.903666	0.878181	0.86897
930	0.916972	0.949601	0.942749	0.961195	0.68492	0.858468	0.901734	0.883792	0.843474	0.871198	0.799813	0.862036	0.922489	0.958604	0.948778	0.918987	0.989525	0.904385	0.878237	0.86901
935	0.923077	0.950021	0.945163	0.961195	0.684579	0.862263	0.89711	0.878695	0.839834	0.867067	0.801681	0.859182	0.920449	0.960227	0.948196	0.920886	0.989525	0.904385	0.878795	0.869609
940	0.921245	0.950021	0.942749	0.963124	0.679461	0.854673	0.898266	0.874618	0.839834	0.867067	0.801867	0.862036	0.927078	0.960227	0.948778	0.918987	0.989525	0.900072	0.877232	0.867941
945	0.913309	0.950231	0.941197	0.961436	0.681337	0.857344	0.893642	0.88685	0.846594	0.867067	0.805042	0.862512	0.925038	0.958198	0.951688	0.91962	0.989525	0.902948	0.878013	0.868763
950	0.913919	0.950021	0.943611	0.960954	0.682532	0.857906	0.895954	0.878695	0.842434	0.868945	0.801494	0.856803	0.923508	0.95901	0.952852	0.917722	0.988827	0.902229	0.877623	0.868341
955	0.918803	0.950441	0.942921	0.95999	0.688843	0.853127	0.895954	0.875637	0.846074	0.864063	0.803735	0.857755	0.920959	0.957386	0.956345	0.922152	0.989525	0.903666	0.877939	0.868685
960	0.922466	0.948341	0.942921	0.961436	0.683555	0.859171	0.891329	0.876656	0.844514	0.865941	0.800934	0.863939	0.920449	0.957792	0.959255	0.915823	0.989525	0.898634	0.87792	0.868674
965	0.918193	0.948761	0.942921	0.961195	0.689526	0.855517	0.895954	0.87156	0.849194	0.864063	0.802428	0.858706	0.921979	0.957792	0.950524	0.920253	0.989525	0.916607	0.878348	0.869087
970	0.909646	0.950231	0.942231	0.95999	0.686455	0.857765	0.89711	0.877676	0.846594	0.871949	0.802428	0.858706	0.924018	0.956981	0.952852	0.918354	0.990223	0.899353	0.878069	0.868826
975	0.918193	0.949601	0.942749	0.960713	0.684749	0.858609	0.891329	0.882773	0.847634	0.868945	0.806162	0.853949	0.923508	0.95901	0.94936	0.920253	0.990223	0.89504	0.878292	0.869058
980	0.917582	0.950021	0.943611	0.961678	0.686796	0.857906	0.895954	0.882773	0.836713	0.868569	0.806723	0.852997	0.924528	0.956981	0.95227	0.913924	0.990223	0.900072	0.878274	0.869012
985	0.921856	0.950231	0.942749	0.961436	0.678949	0.859874	0.895954	0.876656	0.847114	0.875329	0.797199	0.852997	0.928098	0.960227	0.946449	0.920253	0.989525	0.898634	0.877586	0.86835
990	0.913919	0.950021	0.943439	0.960472	0.687308	0.859311	0.894798	0.880734	0.849714	0.868945	0.804669	0.857755	0.928098	0.95901	0.951106	0.917722	0.988128	0.90151	0.878981	0.869786
995	0.913919	0.949181	0.943783	0.960472	0.689867	0.864652	0.890173	0.883792	0.840354	0.87608	0.801681	0.859657	0.925038	0.958604	0.951106	0.91962	0.989525	0.905104	0.879762	0.870661
1000	0.912698	0.950231	0.944473	0.960954	0.689696	0.86156	0.887861	0.883792	0.846074	0.874202	0.79944	0.858706	0.921979	0.957386	0.95518	0.915823	0.989525	0.912293	0.879353	0.870215
1005	0.913309	0.950021	0.944646	0.95999	0.686796	0.861701	0.890173	0.880734	0.840354	0.873827	0.800373	0.857755	0.927588	0.957386	0.95518	0.912025	0.988827	0.892164	0.878367	0.869167
1010	0.91453	0.948971	0.943266	0.95999	0.689185	0.862544	0.893642	0.880734	0.845554	0.868945	0.800187	0.8549	0.919429	0.959416	0.952852	0.918354	0.988128	0.902229	0.878553	0.869351
1015	0.910867	0.949181	0.942059	0.961195	0.686455	0.862403	0.899422	0.878695	0.841394	0.870447	0.802054	0.8549	0.926568	0.95901	0.954016	0.920253	0.989525	0.897196	0.878516	0.869298
1020	0.911477	0.948131	0.945163	0.961436	0.687137	0.863387	0.900578	0.885831	0.836193	0.866316	0.804855	0.852997	0.931668	0.956575	0.95518	0.911392	0.990922	0.899353	0.878906	0.869715
1025	0.918193	0.949601	0.94637	0.960713	0.692938	0.865495	0.890173	0.888889	0.839314	0.871198	0.802428	0.85823	0.929628	0.958198	0.959837	0.91962	0.990223	0.90798	0.881027	0.872018
1030	0.921856	0.950021	0.945163	0.960713	0.688843	0.865074	0.894798	0.873598	0.842954	0.871198	0.802241	0.859182	0.925038	0.959821	0.952852	0.921519	0.988827	0.903666	0.880078	0.870986
1035	0.91453	0.949391	0.946887	0.960713	0.696179	0.86409	0.90289	0.889908	0.847114	0.873075	0.805976	0.85823	0.927078	0.960227	0.959255	0.921519	0.990922	0.910137	0.88218	0.87322
1040	0.916972	0.951071	0.944646	0.960954	0.691232	0.86423	0.890173	0.877676	0.842954	0.86932	0.803175	0.860133	0.930138	0.959821	0.959255	0.924051	0.988128	0.899353	0.880506	0.87147
1045	0.922466	0.950231	0.945853	0.961195	0.689185	0.862122	0.891329	0.881753	0.847114	0.8727	0.801867	0.857755	0.921469	0.958198	0.95518	0.921519	0.990922	0.897196	0.879855	0.870751
1050	0.91453	0.951071	0.944128	0.962883	0.68799	0.861982	0.898266	0.877676	0.842434	0.874953	0.802428	0.862512	0.930138	0.958604	0.951106	0.926582	0.989525	0.89504	0.879967	0.870859
1055	0.913309	0.950231	0.944473	0.960954	0.691402	0.86423	0.899422	0.88787	0.840874	0.866692	0.805789	0.8549	0.927588	0.960633	0.952852	0.918354	0.993017	0.898634	0.88019	0.871093
1060	0.912088	0.950441	0.946543	0.95999	0.687137	0.861841	0.901734	0.876656	0.843994	0.869696	0.808217	0.855376	0.929118	0.957792	0.952852	0.917089	0.988827	0.905823	0.879855	0.870732
1065	0.918803	0.949601	0.943611	0.960954	0.692938	0.862825	0.899422	0.876656	0.837754	0.868569	0.8	0.865842	0.927588	0.957792	0.955763	0.920886	0.990223	0.897915	0.879762	0.870651
1070	0.906593	0.950651	0.945163	0.960713	0.687479	0.866198	0.901734	0.884811	0.843994	0.868569	0.802801	0.852521	0.928608	0.957792	0.952852	0.914557	0.989525	0.902229	0.879501	0.870375
1075	0.915751	0.949601	0.945508	0.960954	0.688332	0.866058	0.900578	0.877676	0.841394	0.872324	0.805602	0.856803	0.924018	0.958198	0.949942	0.922152	0.990223	0.895758	0.880041	0.870941
1080	0.91514	0.948971	0.944991	0.960231	0.687137	0.863387	0.900578	0.873598	0.841914	0.867818	0.796639	0.858706	0.923508	0.958604	0.953434	0.922152	0.990922	0.902948	0.87859	0.869398
1085	0.916361	0.948971	0.944301	0.961678	0.692085	0.862122	0.898266	0.873598	0.844514	0.870447	0.804295	0.857755	0.929628	0.958604	0.953434	0.917089	0.99162	0.905104	0.880097	0.871004
1090	0.91514	0.949601	0.941542	0.961195	0.68799	0.863949	0.892486	0.882773	0.845034	0.874578	0.802428	0.861085	0.930648	0.959416	0.956345	0.923418	0.990223	0.897915	0.879948	0.870849
1095	0.918193	0.950441	0.946715	0.961436	0.693791	0.864652	0.891329	0.882773	0.850234	0.879084	0.800934	0.861085	0.928608	0.956981	0.956927	0.91519	0.988827	0.900791	0.881287	0.872289
1100	0.916972	0.950861	0.946025	0.961195	0.691232	0.863387	0.893642	0.890928	0.845554	0.875704	0.802054	0.860609	0.930648	0.960633	0.956927	0.925316	0.990223	0.897196	0.881176	0.872156
1105	0.923077	0.950021	0.944301	0.961678	0.687137	0.862403	0.901734	0.874618	0.846594	0.878333	0.800934	0.851094	0.931668	0.958198	0.958091	0.922152	0.989525	0.895758	0.879892	0.870807
1110	0.915751	0.949601	0.944473	0.960472	0.692938	0.85903	0.899422	0.889908	0.851274	0.874202	0.80112	0.853473	0.930648	0.958604	0.959255	0.918987	0.990223	0.898634	0.880078	0.870999
1115	0.916972	0.949181	0.945508	0.961678	0.688161	0.861138	0.900578	0.876656	0.850754	0.874953	0.805602	0.85823	0.931158	0.95901	0.956927	0.926582	0.988827	0.894321	0.880506	0.87145
1120	0.918803	0.949391	0.943956	0.962401	0.688502	0.863528	0.899422	0.877676	0.845554	0.882463	0.800747	0.86156	0.928098	0.958604	0.954598	0.923418	0.989525	0.897196	0.88045	0.871426
1125	0.912088	0.948341	0.946025	0.960713	0.685602	0.861841	0.90289	0.881753	0.842434	0.871573	0.79944	0.85823	0.928098	0.958198	0.955763	0.925949	0.990922	0.900072	0.879129	0.86998
1130	0.918193	0.951281	0.943266	0.961919	0.686626	0.860436	0.906358	0.88685	0.841394	0.877582	0.803175	0.864891	0.929118	0.958604	0.954016	0.918354	0.988827	0.903666	0.880153	0.871087
1135	0.92735	0.949391	0.943783	0.961436	0.682873	0.86156	0.900578	0.882773	0.839314	0.874953	0.801681	0.857755	0.920959	0.959821	0.952852	0.922785	0.990223	0.905823	0.879167	0.87003
1140	0.913919	0.949811	0.946887	0.962883	0.687308	0.86662	0.89711	0.872579	0.846074	0.868194	0.804482	0.862512	0.927078	0.958604	0.952852	0.922152	0.989525	0.900791	0.880525	0.871482
1145	0.919414	0.948551	0.943439	0.960472	0.688502	0.861841	0.899422	0.891947	0.847114	0.878333	0.802801	0.853949	0.924528	0.958604	0.954598	0.916456	0.988128	0.900791	0.879706	0.870586
1150	0.911477	0.948341	0.945853	0.960472	0.689526	0.860857	0.891329	0.881753	0.842434	0.877582	0.802988	0.864891	0.928098	0.959821	0.951106	0.924051	0.989525	0.90151	0.879967	0.870879
1155	0.923687	0.948971	0.945335	0.962401	0.691061	0.864933	0.901734	0.878695	0.839314	0.871949	0.806162	0.856803	0.931668	0.958604	0.955763	0.921519	0.990223	0.905104	0.881176	0.872156
1160	0.910256	0.950021	0.944128	0.960472	0.686114	0.862403	0.892486	0.876656	0.848154	0.870071	0.802428	0.857279	0.931668	0.957386	0.955763	0.921519	0.990223	0.906542	0.879371	0.870239
1165	0.916361	0.950231	0.944646	0.961436	0.692085	0.862684	0.890173	0.882773	0.838274	0.875329	0.803175	0.863463	0.929628	0.958198	0.954016	0.924051	0.990223	0.902229	0.880562	0.871508
1170	0.913919	0.950021	0.943266	0.960954	0.690038	0.865917	0.898266	0.880734	0.840354	0.881712	0.804482	0.858706	0.932687	0.961039	0.954016	0.926582	0.989525	0.905104	0.881287	0.872293
1175	0.91514	0.949181	0.944818	0.960713	0.687137	0.865777	0.901734	0.883792	0.856994	0.879459	0.801494	0.859657	0.928098	0.958604	0.956927	0.920253	0.989525	0.904385	0.881008	0.872014
1180	0.919414	0.950231	0.946715	0.961678	0.682702	0.86142	0.898266	0.879715	0.843474	0.875329	0.799627	0.862512	0.933197	0.958198	0.956345	0.920253	0.99162	0.900072	0.87965	0.870565
1185	0.920635	0.950231	0.943094	0.961919	0.68782	0.859171	0.900578	0.883792	0.843474	0.874202	0.805042	0.857279	0.931158	0.95901	0.956345	0.922785	0.990922	0.903666	0.880078	0.870998
1190	0.918193	0.950231	0.944991	0.960954	0.683214	0.86156	0.899422	0.888889	0.845034	0.877957	0.800373	0.858706	0.935237	0.960227	0.956345	0.924684	0.990922	0.903666	0.880115	0.871066
1195	0.915751	0.951071	0.944301	0.961919	0.683385	0.863528	0.905202	0.881753	0.841394	0.873827	0.800187	0.859657	0.932177	0.958604	0.950524	0.913924	0.988827	0.902948	0.879278	0.870135
1200	0.915751	0.948551	0.945853	0.960954	0.684408	0.860998	0.892486	0.88787	0.845554	0.874202	0.804855	0.857279	0.934217	0.959821	0.956927	0.921519	0.989525	0.90798	0.880078	0.871024
1205	0.913919	0.949181	0.944301	0.960713	0.686285	0.860295	0.904046	0.877676	0.850234	0.879084	0.798693	0.863463	0.936257	0.95901	0.952852	0.91962	0.988827	0.902229	0.879725	0.870617
1210	0.917582	0.949601	0.943956	0.961436	0.69072	0.864652	0.900578	0.885831	0.838794	0.879459	0.803735	0.859657	0.931158	0.957386	0.949942	0.916456	0.988827	0.891445	0.880283	0.871191
1215	0.915751	0.949811	0.945508	0.960231	0.685943	0.862684	0.889017	0.895005	0.844514	0.876831	0.801867	0.862988	0.933707	0.958604	0.956927	0.920253	0.988827	0.902229	0.880301	0.871231
1220	0.920635	0.949811	0.947405	0.961195	0.68782	0.855798	0.890173	0.878695	0.845034	0.881712	0.802614	0.855376	0.937787	0.960227	0.956345	0.923418	0.990223	0.899353	0.880041	0.870947
1225	0.923687	0.950441	0.944473	0.961436	0.685773	0.858749	0.895954	0.888889	0.843474	0.8727	0.805042	0.862036	0.934217	0.960633	0.958673	0.920886	0.988128	0.903666	0.880283	0.871218
1230	0.916361	0.950651	0.947405	0.96216	0.68782	0.861701	0.895954	0.883792	0.845554	0.875329	0.799066	0.856327	0.936257	0.960227	0.959837	0.918987	0.989525	0.900791	0.880357	0.871308
1235	0.918803	0.950231	0.945508	0.960472	0.68509	0.861138	0.894798	0.892966	0.844514	0.880586	0.803922	0.862512	0.934727	0.958604	0.956927	0.920253	0.989525	0.899353	0.880562	0.871535
1240	0.918803	0.949811	0.944818	0.960472	0.684749	0.86142	0.884393	0.879715	0.841914	0.874202	0.800747	0.861085	0.937277	0.959416	0.956345	0.918354	0.989525	0.89504	0.879204	0.870055
1245	0.920635	0.949811	0.944818	0.961678	0.68509	0.861279	0.892486	0.893986	0.843474	0.876831	0.802054	0.857279	0.934727	0.958604	0.959837	0.91962	0.990922	0.899353	0.880097	0.871032
1250	0.916361	0.948971	0.946198	0.960231	0.687479	0.863528	0.890173	0.889908	0.845554	0.874953	0.806909	0.8549	0.935237	0.960227	0.958673	0.925949	0.990223	0.905104	0.88112	0.872119
1255	0.920024	0.949391	0.945508	0.959749	0.68202	0.865074	0.893642	0.897044	0.840354	0.876455	0.803361	0.860133	0.932177	0.956981	0.957509	0.924051	0.988827	0.900072	0.880171	0.87113
1260	0.920635	0.951281	0.947922	0.960713	0.688843	0.857344	0.900578	0.893986	0.845034	0.871198	0.804669	0.859657	0.934727	0.960227	0.959255	0.925316	0.988128	0.903666	0.880897	0.871878
1265	0.911477	0.949601	0.944128	0.960472	0.683385	0.862403	0.904046	0.883792	0.840874	0.874953	0.803175	0.859657	0.934217	0.956981	0.954598	0.920886	0.989525	0.909418	0.879613	0.870511
1270	0.924908	0.950021	0.946887	0.960472	0.686114	0.863106	0.907514	0.883792	0.847114	0.871198	0.799627	0.856803	0.934727	0.960227	0.958673	0.921519	0.989525	0.90798	0.880655	0.871646
1275	0.913919	0.949181	0.94706	0.961195	0.689526	0.863106	0.898266	0.884811	0.843474	0.8727	0.80056	0.86156	0.938297	0.959416	0.958673	0.917722	0.989525	0.902229	0.880618	0.871596
1280	0.92735	0.949181	0.945335	0.960954	0.683043	0.862403	0.894798	0.900102	0.845034	0.88021	0.801681	0.862512	0.934727	0.960227	0.953434	0.918354	0.988128	0.908699	0.880711	0.871699
1285	0.918803	0.950441	0.946025	0.96216	0.683214	0.863387	0.891329	0.889908	0.843994	0.879835	0.802614	0.86156	0.931158	0.959821	0.956927	0.922785	0.989525	0.903666	0.880636	0.871639
1290	0.921856	0.950651	0.946715	0.961195	0.684408	0.860436	0.892486	0.88787	0.839834	0.87608	0.8	0.856327	0.934217	0.958198	0.953434	0.920886	0.989525	0.900072	0.879446	0.870324
1295	0.919414	0.949811	0.944128	0.961436	0.68202	0.856922	0.890173	0.897044	0.843474	0.87608	0.805789	0.855376	0.931158	0.958198	0.954598	0.923418	0.990922	0.893602	0.878981	0.869811
1300	0.915751	0.950861	0.945853	0.961195	0.685432	0.862263	0.895954	0.882773	0.845034	0.877582	0.80112	0.861085	0.936767	0.960227	0.954598	0.925316	0.990922	0.895758	0.880339	0.871291
1305	0.921856	0.948971	0.945508	0.961678	0.68202	0.859733	0.899422	0.888889	0.853354	0.877957	0.801867	0.859182	0.938807	0.958198	0.956927	0.918354	0.990223	0.905823	0.880227	0.87119
1310	0.913309	0.949811	0.943956	0.959749	0.679973	0.863106	0.892486	0.882773	0.842434	0.876831	0.79944	0.866318	0.936257	0.959821	0.956345	0.921519	0.992318	0.897915	0.879222	0.870119
1315	0.925519	0.950231	0.944991	0.960472	0.685432	0.85903	0.890173	0.897044	0.850234	0.877206	0.80112	0.863939	0.935237	0.957792	0.959837	0.921519	0.988827	0.902229	0.88045	0.871403
1320	0.918193	0.950441	0.945853	0.960954	0.683385	0.857765	0.899422	0.889908	0.842434	0.875329	0.798319	0.854424	0.936257	0.959416	0.958091	0.922152	0.988827	0.900072	0.878999	0.869842
1325	0.920635	0.950231	0.945853	0.961195	0.68219	0.863809	0.905202	0.88685	0.847634	0.879084	0.80112	0.857279	0.933707	0.959821	0.957509	0.925949	0.988827	0.903666	0.880655	0.871671
1330	0.924908	0.950021	0.94568	0.961436	0.680996	0.860295	0.894798	0.90316	0.843994	0.876455	0.796825	0.862512	0.933707	0.957792	0.960419	0.920253	0.988128	0.902229	0.879594	0.870514
1335	0.920635	0.950441	0.942749	0.960472	0.684579	0.862966	0.901734	0.890928	0.849194	0.873827	0.805976	0.859182	0.932687	0.95901	0.956345	0.922785	0.990223	0.898634	0.880506	0.871481
1340	0.924298	0.950021	0.944991	0.961919	0.686455	0.864512	0.89711	0.889908	0.846074	0.871573	0.805976	0.85823	0.931668	0.960633	0.952852	0.925316	0.989525	0.896477	0.880915	0.871908
1345	0.923687	0.949601	0.946198	0.962642	0.682361	0.861982	0.889017	0.898063	0.838794	0.875329	0.798693	0.856327	0.932687	0.959416	0.959255	0.920886	0.989525	0.902948	0.879632	0.870551
1350	0.921245	0.950861	0.946715	0.960954	0.684579	0.857625	0.90289	0.88787	0.844514	0.876831	0.804482	0.861085	0.936257	0.960633	0.959255	0.925316	0.988827	0.902948	0.880636	0.871596
1355	0.924298	0.950021	0.94706	0.961678	0.685773	0.862825	0.893642	0.898063	0.845034	0.874202	0.804295	0.862036	0.937787	0.960227	0.952852	0.924684	0.988827	0.903666	0.881343	0.872355
1360	0.916361	0.949601	0.945508	0.960713	0.688673	0.862544	0.893642	0.883792	0.847634	0.874953	0.798693	0.864415	0.935747	0.958604	0.954016	0.925949	0.989525	0.897915	0.880301	0.871253
1365	0.920635	0.949181	0.945335	0.960713	0.682702	0.858327	0.905202	0.896024	0.844514	0.873827	0.802241	0.864891	0.935747	0.95901	0.95518	0.918987	0.988128	0.907261	0.879836	0.870758
1370	0.927961	0.950021	0.946025	0.960954	0.682702	0.858468	0.889017	0.897044	0.844514	0.875329	0.802054	0.865366	0.933707	0.958198	0.958091	0.918987	0.990223	0.897915	0.879874	0.870786
1375	0.923077	0.950651	0.946715	0.961919	0.680655	0.862403	0.89711	0.888889	0.842954	0.874578	0.801867	0.858706	0.932177	0.959416	0.956927	0.921519	0.990223	0.90151	0.879967	0.870897
1380	0.925519	0.949601	0.94568	0.961436	0.683726	0.856781	0.891329	0.899083	0.846074	0.877957	0.803361	0.862988	0.938807	0.959416	0.955763	0.921519	0.988827	0.903666	0.880301	0.87125
1385	0.926129	0.949601	0.944646	0.961195	0.684749	0.8565	0.901734	0.901121	0.840874	0.873451	0.802054	0.857755	0.936257	0.958604	0.958673	0.917722	0.988827	0.902948	0.879557	0.870454
1390	0.918193	0.948971	0.943439	0.961678	0.680996	0.856781	0.892486	0.902141	0.846594	0.882088	0.801307	0.860609	0.932687	0.960227	0.954598	0.91962	0.989525	0.897196	0.879074	0.869953
1395	0.916361	0.950861	0.94637	0.961195	0.683214	0.859171	0.889017	0.88685	0.843474	0.876831	0.802988	0.857755	0.937787	0.958604	0.95227	0.920253	0.989525	0.897915	0.879446	0.87033
1400	0.918803	0.950021	0.947577	0.961919	0.683385	0.852846	0.912139	0.881753	0.840874	0.877206	0.803922	0.861085	0.933707	0.959416	0.958673	0.91962	0.988128	0.90151	0.879371	0.870248
1405	0.924298	0.949811	0.944646	0.95999	0.680314	0.862263	0.895954	0.885831	0.846594	0.879835	0.803922	0.86156	0.933197	0.960227	0.956927	0.917089	0.988128	0.900072	0.879985	0.870942
1410	0.920024	0.949601	0.946198	0.961436	0.684237	0.859733	0.904046	0.893986	0.848674	0.877957	0.80056	0.857755	0.937277	0.960633	0.954598	0.91519	0.988827	0.905104	0.880171	0.871121
1415	0.918193	0.948551	0.946887	0.961436	0.680996	0.860155	0.890173	0.897044	0.847114	0.876455	0.805602	0.861085	0.936767	0.961851	0.955763	0.922152	0.989525	0.905823	0.88045	0.871431
1420	0.924298	0.951071	0.946887	0.960954	0.687479	0.860998	0.886705	0.897044	0.842954	0.877582	0.804108	0.862512	0.934217	0.961039	0.958673	0.918987	0.990223	0.900072	0.881138	0.872137
1425	0.927961	0.950441	0.945853	0.960954	0.684237	0.854814	0.887861	0.891947	0.849714	0.876831	0.801307	0.857279	0.935237	0.95901	0.956927	0.923418	0.99162	0.902948	0.879687	0.870593
1430	0.925519	0.951071	0.945163	0.960954	0.686796	0.860857	0.890173	0.889908	0.846074	0.873451	0.803548	0.86156	0.935237	0.958604	0.958091	0.920886	0.990223	0.898634	0.880562	0.871516
1435	0.918803	0.949601	0.944818	0.961436	0.683214	0.858749	0.895954	0.889908	0.854914	0.876831	0.802988	0.862036	0.930138	0.957386	0.961583	0.924684	0.988827	0.903666	0.880171	0.871113
1440	0.92735	0.950231	0.944473	0.961678	0.682873	0.859452	0.90289	0.897044	0.845034	0.878708	0.804855	0.859657	0.935747	0.957792	0.956927	0.921519	0.988827	0.910137	0.880748	0.871729
1445	0.917582	0.950231	0.946025	0.961678	0.68202	0.854533	0.889017	0.885831	0.842434	0.874202	0.804108	0.859657	0.935237	0.959416	0.959255	0.917722	0.990223	0.899353	0.878832	0.869667
1450	0.921856	0.950021	0.946025	0.960954	0.677414	0.860576	0.901734	0.899083	0.842954	0.875329	0.800373	0.859182	0.935237	0.957386	0.95518	0.91962	0.990922	0.903666	0.879278	0.870186
1455	0.922466	0.948761	0.946198	0.960472	0.681337	0.852424	0.899422	0.907238	0.836713	0.872324	0.804108	0.86156	0.934727	0.961039	0.956927	0.924051	0.988827	0.900791	0.878925	0.869739
1460	0.922466	0.949391	0.944301	0.960231	0.679973	0.855938	0.889017	0.897044	0.849714	0.878708	0.80056	0.858706	0.935237	0.957792	0.954598	0.928481	0.98743	0.906542	0.879074	0.869936
1465	0.925519	0.951071	0.948267	0.961919	0.682532	0.858187	0.898266	0.902141	0.850234	0.879459	0.801494	0.861085	0.936767	0.960227	0.958673	0.91962	0.990223	0.899353	0.880859	0.871875
1470	0.929182	0.949601	0.94568	0.960954	0.682532	0.857625	0.899422	0.902141	0.842434	0.880586	0.799813	0.85823	0.936257	0.959416	0.956345	0.918354	0.989525	0.903666	0.879855	0.87079
1475	0.920024	0.950651	0.946887	0.961195	0.684237	0.857625	0.895954	0.899083	0.845034	0.88359	0.802988	0.86156	0.937787	0.960633	0.961001	0.920253	0.990223	0.899353	0.880804	0.871784
1480	0.926129	0.949811	0.946887	0.960472	0.681508	0.859874	0.89711	0.905199	0.845554	0.877957	0.803361	0.856327	0.929628	0.957386	0.956927	0.921519	0.989525	0.905104	0.880153	0.871066
1485	0.929182	0.950021	0.944991	0.959267	0.683385	0.853689	0.892486	0.892966	0.847634	0.878708	0.80056	0.864891	0.937277	0.960633	0.956927	0.928481	0.989525	0.900791	0.879743	0.870651
1490	0.921856	0.950441	0.948957	0.960954	0.680655	0.853549	0.904046	0.902141	0.842434	0.872324	0.800187	0.857755	0.936257	0.958604	0.958091	0.924051	0.989525	0.909418	0.879334	0.870236
1495	0.923687	0.950441	0.944991	0.96216	0.677414	0.858468	0.89711	0.899083	0.843994	0.879459	0.801681	0.855376	0.938807	0.958604	0.95518	0.91962	0.988827	0.905104	0.87939	0.8703
1500	0.927961	0.950231	0.947232	0.960954	0.676561	0.856781	0.906358	0.906218	0.840354	0.88021	0.801681	0.860133	0.936257	0.958604	0.95518	0.931646	0.989525	0.90151	0.879892	0.870831
1505	0.924298	0.950651	0.945508	0.961195	0.682532	0.85636	0.90289	0.910296	0.845554	0.879459	0.802614	0.860133	0.936257	0.961851	0.949942	0.922785	0.989525	0.900791	0.880208	0.871157
1510	0.921856	0.950651	0.946887	0.961195	0.682532	0.855657	0.906358	0.902141	0.848674	0.873451	0.801494	0.861085	0.936767	0.959821	0.959255	0.929747	0.989525	0.905104	0.880376	0.871324
1515	0.931624	0.949811	0.947922	0.960472	0.679802	0.856781	0.89711	0.899083	0.850754	0.877582	0.802988	0.862988	0.935237	0.95901	0.960419	0.925949	0.988827	0.905823	0.880636	0.871628
1520	0.923687	0.951281	0.94568	0.961436	0.686455	0.856781	0.892486	0.905199	0.845034	0.879084	0.798693	0.859657	0.939827	0.959416	0.961001	0.922152	0.988128	0.905823	0.880506	0.871484
1525	0.923077	0.951281	0.94637	0.961919	0.67929	0.863809	0.898266	0.898063	0.840874	0.877957	0.804669	0.860133	0.933707	0.959821	0.956345	0.915823	0.988827	0.905104	0.88058	0.871577
1530	0.92735	0.950651	0.945335	0.961678	0.678779	0.858046	0.887861	0.908257	0.844514	0.876455	0.800747	0.859182	0.937277	0.959416	0.958091	0.920886	0.989525	0.900791	0.879576	0.870486
1535	0.920635	0.950861	0.946543	0.960713	0.683896	0.863528	0.886705	0.899083	0.836193	0.878708	0.798506	0.864415	0.939317	0.959416	0.955763	0.918987	0.990223	0.902948	0.880357	0.871332
1540	0.928571	0.950231	0.944473	0.961678	0.67929	0.859311	0.900578	0.898063	0.848154	0.872324	0.803735	0.855376	0.931668	0.95901	0.952852	0.926582	0.988128	0.907261	0.879706	0.870605
1545	0.924298	0.950021	0.945335	0.961195	0.676561	0.859311	0.891329	0.906218	0.847114	0.88021	0.799066	0.862512	0.934217	0.961851	0.94936	0.91962	0.990922	0.905104	0.879408	0.870336
1550	0.927961	0.951071	0.947922	0.961919	0.681679	0.859171	0.878613	0.898063	0.837233	0.879084	0.799813	0.860133	0.939827	0.95901	0.956927	0.920886	0.989525	0.899353	0.879874	0.870818
1555	0.928571	0.950231	0.944991	0.961195	0.685943	0.863528	0.889017	0.910296	0.843994	0.881337	0.806162	0.859657	0.938807	0.959821	0.951688	0.915823	0.990223	0.897915	0.88151	0.872529
1560	0.923077	0.950231	0.944473	0.961919	0.674684	0.85397	0.895954	0.90316	0.843994	0.878708	0.799253	0.863939	0.938297	0.960227	0.957509	0.921519	0.990223	0.90151	0.878627	0.869483
1565	0.921856	0.950441	0.94568	0.95999	0.680655	0.858327	0.892486	0.895005	0.850234	0.876831	0.803735	0.854424	0.938297	0.958604	0.951106	0.925949	0.988827	0.90151	0.879632	0.870528
1570	0.931624	0.950651	0.944301	0.960472	0.68492	0.858187	0.894798	0.907238	0.846594	0.877957	0.800187	0.85823	0.933197	0.95901	0.965076	0.918987	0.989525	0.905823	0.880469	0.871448
1575	0.922466	0.950861	0.94637	0.961919	0.680314	0.857484	0.89711	0.908257	0.849194	0.874953	0.800934	0.865842	0.939827	0.95901	0.95518	0.922785	0.989525	0.897915	0.880153	0.871119
1580	0.923687	0.950231	0.944128	0.961436	0.683555	0.855235	0.906358	0.905199	0.840874	0.879084	0.801494	0.862988	0.935747	0.956981	0.954598	0.924051	0.990223	0.906542	0.879874	0.870789
1585	0.922466	0.949181	0.946198	0.961678	0.685773	0.855657	0.899422	0.906218	0.843474	0.879835	0.8	0.856327	0.934727	0.957792	0.952852	0.915823	0.988827	0.902229	0.879464	0.870338
1590	0.92735	0.949601	0.946543	0.960472	0.68202	0.854533	0.893642	0.913354	0.847634	0.883965	0.802614	0.857279	0.935747	0.957792	0.960419	0.926582	0.988128	0.905823	0.880394	0.871374
1595	0.924908	0.950021	0.944818	0.961436	0.677243	0.857203	0.892486	0.905199	0.848674	0.879459	0.802428	0.865366	0.934727	0.958198	0.959837	0.923418	0.99162	0.905823	0.879985	0.87095
1600	0.928571	0.950441	0.945163	0.960713	0.678267	0.854111	0.890173	0.898063	0.852314	0.875704	0.79888	0.860133	0.936767	0.956981	0.951106	0.913291	0.988827	0.913731	0.878609	0.869433
1605	0.932845	0.950231	0.946198	0.961436	0.681508	0.855376	0.891329	0.901121	0.848154	0.87608	0.800934	0.857279	0.937277	0.960227	0.960419	0.925949	0.988827	0.90151	0.879967	0.870913
1610	0.918803	0.950651	0.944818	0.95999	0.683214	0.853127	0.887861	0.90316	0.845554	0.882463	0.797572	0.856327	0.931668	0.959416	0.959837	0.917089	0.989525	0.902229	0.878553	0.869384
1615	0.921856	0.949391	0.94706	0.960713	0.680143	0.857484	0.899422	0.908257	0.848154	0.877206	0.801307	0.858706	0.935237	0.959821	0.957509	0.918987	0.988827	0.896477	0.879613	0.870532
1620	0.92735	0.950651	0.947232	0.960954	0.675708	0.855376	0.889017	0.899083	0.843474	0.88021	0.80056	0.865842	0.939317	0.957386	0.95518	0.920253	0.989525	0.902948	0.879204	0.870099
1625	0.921856	0.950651	0.94568	0.960954	0.676902	0.854673	0.90289	0.909276	0.845034	0.877206	0.801867	0.862036	0.933707	0.958604	0.956345	0.922785	0.990223	0.900072	0.879111	0.869993
1630	0.921856	0.948761	0.945163	0.960954	0.685943	0.853549	0.894798	0.900102	0.846594	0.877957	0.803548	0.859657	0.938297	0.959416	0.960419	0.91962	0.989525	0.902948	0.879892	0.870806
1635	0.924298	0.949811	0.944646	0.961678	0.680314	0.858468	0.904046	0.902141	0.845034	0.878708	0.803361	0.867269	0.934727	0.960227	0.962165	0.918987	0.989525	0.905104	0.880543	0.871538
1640	0.918803	0.950231	0.944991	0.961436	0.680826	0.853689	0.892486	0.902141	0.852314	0.876831	0.802054	0.865842	0.932177	0.959416	0.958673	0.918987	0.988827	0.904385	0.879371	0.870255
1645	0.924298	0.949601	0.948612	0.960713	0.687479	0.852003	0.891329	0.890928	0.845554	0.876831	0.79888	0.862512	0.937277	0.958604	0.961583	0.924684	0.990922	0.898634	0.879725	0.870625
1650	0.934066	0.950441	0.946543	0.96216	0.683214	0.857625	0.889017	0.897044	0.839314	0.874578	0.801494	0.862512	0.936257	0.959416	0.954598	0.917089	0.989525	0.912293	0.880134	0.871088
1655	0.92674	0.949811	0.946887	0.95999	0.68782	0.85903	0.891329	0.90316	0.849714	0.878333	0.801681	0.863463	0.935747	0.960227	0.958091	0.917722	0.988827	0.90151	0.881027	0.872033
1660	0.924298	0.949601	0.947232	0.961678	0.68202	0.854111	0.890173	0.907238	0.846594	0.882839	0.799813	0.856803	0.937787	0.957792	0.956927	0.918354	0.989525	0.905104	0.879594	0.8705
1665	0.948107	0.951071	0.947922	0.95999	0.682361	0.863949	0.894798	0.912334	0.844514	0.887721	0.796825	0.868221	0.939317	0.959821	0.961583	0.925949	0.99162	0.899353	0.882645	0.873802
1670	0.940781	0.950441	0.944646	0.961436	0.682532	0.864512	0.89711	0.91947	0.846074	0.88021	0.805229	0.862512	0.939827	0.959821	0.956345	0.924051	0.99162	0.90798	0.882701	0.873845
1675	0.96337	0.951281	0.946543	0.96216	0.675708	0.874631	0.904046	0.927625	0.848674	0.890349	0.800934	0.860133	0.940337	0.961445	0.956927	0.920253	0.990922	0.900072	0.884431	0.875762
1680	0.965812	0.950231	0.945163	0.960713	0.680314	0.870134	0.893642	0.927625	0.854914	0.884341	0.800747	0.861085	0.936257	0.960633	0.958091	0.923418	0.99162	0.912293	0.884115	0.875388
1685	0.961538	0.950651	0.944818	0.960954	0.679632	0.868025	0.89711	0.933741	0.847114	0.882839	0.800373	0.861085	0.938297	0.960227	0.954598	0.922785	0.990922	0.909418	0.883259	0.874475
1690	0.959707	0.951071	0.945335	0.960954	0.677414	0.867885	0.893642	0.926606	0.846074	0.889974	0.802801	0.862036	0.938297	0.962256	0.963329	0.925316	0.990922	0.904385	0.883761	0.87502
1695	0.967643	0.951701	0.946198	0.960954	0.681167	0.868166	0.893642	0.93476	0.849194	0.885468	0.801867	0.872027	0.935747	0.958604	0.962747	0.921519	0.990922	0.910855	0.88471	0.876052
1700	0.96337	0.950651	0.945508	0.961436	0.68202	0.870836	0.899422	0.925586	0.847634	0.885092	0.799253	0.864415	0.938297	0.960633	0.963329	0.927848	0.988827	0.910855	0.884524	0.875853
1705	0.959096	0.949391	0.946025	0.963365	0.681167	0.870977	0.901734	0.93476	0.854914	0.885468	0.802801	0.864415	0.938807	0.961445	0.959837	0.91962	0.988128	0.907261	0.88484	0.876214
1710	0.961538	0.950651	0.94637	0.960472	0.681167	0.869852	0.892486	0.925586	0.850754	0.885468	0.804482	0.863939	0.931668	0.962662	0.963329	0.918987	0.989525	0.904385	0.884226	0.875522
1715	0.957265	0.950441	0.947405	0.96216	0.679461	0.870977	0.898266	0.916412	0.847114	0.884341	0.801867	0.858706	0.936767	0.961445	0.958673	0.922785	0.988827	0.905104	0.88365	0.874919
1720	0.960928	0.950441	0.948784	0.961678	0.677243	0.867885	0.890173	0.929664	0.843474	0.887345	0.800373	0.862512	0.934727	0.959821	0.949942	0.920886	0.988827	0.903666	0.882831	0.87403
1725	0.954823	0.951071	0.946887	0.96216	0.67912	0.865355	0.904046	0.936799	0.849714	0.889598	0.801867	0.861085	0.938807	0.95901	0.957509	0.926582	0.988827	0.907261	0.883798	0.875075
1730	0.962149	0.951071	0.944818	0.961919	0.681337	0.871398	0.89711	0.928644	0.852314	0.88359	0.802801	0.865842	0.936257	0.959416	0.960419	0.927215	0.988128	0.90798	0.884673	0.876013
1735	0.954212	0.951071	0.946887	0.960231	0.684067	0.868447	0.893642	0.933741	0.847634	0.881337	0.79944	0.862036	0.934727	0.960633	0.954598	0.924051	0.989525	0.900791	0.883278	0.874493
1740	0.962149	0.949811	0.946025	0.96216	0.682873	0.867744	0.889017	0.940877	0.858554	0.882463	0.803548	0.859182	0.934217	0.961039	0.956927	0.925949	0.988827	0.912293	0.884449	0.875763
1745	0.960928	0.951281	0.946715	0.960954	0.684237	0.868025	0.89711	0.926606	0.851794	0.882088	0.802801	0.857279	0.941356	0.960633	0.959837	0.926582	0.98743	0.90798	0.884375	0.875682
1750	0.961538	0.948761	0.944646	0.961919	0.681508	0.86156	0.905202	0.924567	0.852834	0.882463	0.805789	0.866794	0.935237	0.960633	0.958091	0.927848	0.99162	0.908699	0.883575	0.874803
1755	0.959707	0.951071	0.945508	0.961436	0.681508	0.867744	0.894798	0.931702	0.854394	0.885468	0.803735	0.860133	0.940847	0.961039	0.961583	0.921519	0.989525	0.913012	0.884505	0.875836
1760	0.956654	0.950651	0.947577	0.962883	0.680484	0.871258	0.885549	0.93476	0.847114	0.882088	0.804482	0.857755	0.938297	0.95901	0.956927	0.922152	0.99162	0.912293	0.884245	0.875535
1765	0.966422	0.950861	0.946887	0.961678	0.678096	0.870836	0.89711	0.91947	0.850754	0.882463	0.803175	0.86156	0.935747	0.961039	0.951688	0.921519	0.99162	0.907261	0.883836	0.875091
1770	0.957875	0.951491	0.947577	0.961678	0.678608	0.867463	0.889017	0.924567	0.854914	0.884341	0.804482	0.869172	0.937787	0.959821	0.961001	0.918987	0.989525	0.905823	0.884096	0.875391
1775	0.957875	0.951281	0.945163	0.96216	0.682873	0.868025	0.900578	0.931702	0.855954	0.883965	0.802801	0.867269	0.933197	0.961851	0.958091	0.921519	0.990223	0.907261	0.884449	0.87573
1780	0.958486	0.950021	0.945853	0.961678	0.678096	0.871398	0.904046	0.928644	0.844514	0.887345	0.801494	0.859657	0.936257	0.961445	0.961583	0.925316	0.990223	0.905104	0.88391	0.875189
1785	0.965201	0.950231	0.944991	0.961436	0.674173	0.868025	0.89711	0.925586	0.844514	0.881712	0.8	0.863463	0.933197	0.959416	0.964494	0.918354	0.988128	0.910855	0.882478	0.873692
1790	0.959096	0.951281	0.948094	0.96216	0.678949	0.86929	0.891329	0.936799	0.851794	0.881712	0.804295	0.863463	0.939317	0.960633	0.956927	0.922785	0.989525	0.909418	0.884431	0.875742
1795	0.955433	0.951491	0.94775	0.961919	0.682532	0.872663	0.904046	0.939857	0.851274	0.884716	0.803735	0.858706	0.936767	0.962662	0.95518	0.926582	0.990922	0.906542	0.885286	0.876658
1800	0.961538	0.951911	0.944473	0.962642	0.677926	0.872382	0.884393	0.93578	0.858554	0.885843	0.803548	0.862988	0.937787	0.960633	0.960419	0.922785	0.990922	0.905823	0.884728	0.87606
1805	0.961538	0.950021	0.947232	0.96216	0.681167	0.869571	0.899422	0.925586	0.850234	0.882839	0.803175	0.865366	0.940337	0.960633	0.954016	0.91962	0.99162	0.908699	0.884356	0.875656
1810	0.966422	0.951281	0.946543	0.962642	0.680484	0.869431	0.900578	0.923547	0.848154	0.882088	0.803548	0.862512	0.937787	0.961851	0.956345	0.914557	0.989525	0.915888	0.884301	0.875582
1815	0.959707	0.951491	0.947232	0.961195	0.681337	0.868587	0.885549	0.927625	0.849714	0.885092	0.802241	0.864415	0.938297	0.957792	0.961583	0.925949	0.989525	0.903666	0.884059	0.875334
1820	0.954212	0.950861	0.946198	0.96216	0.680996	0.863668	0.899422	0.931702	0.858034	0.884341	0.802801	0.865366	0.939317	0.959821	0.958673	0.925316	0.988827	0.899353	0.88365	0.874889
1825	0.962759	0.950651	0.946887	0.960231	0.680314	0.873647	0.901734	0.926606	0.847114	0.885092	0.802428	0.863939	0.936767	0.958604	0.956927	0.924684	0.989525	0.905104	0.884505	0.87583
1830	0.954823	0.950651	0.947577	0.95999	0.680655	0.869571	0.895954	0.927625	0.850754	0.880586	0.803175	0.863939	0.937787	0.962662	0.961583	0.922152	0.989525	0.905823	0.88404	0.875322
1835	0.959096	0.950021	0.94637	0.960472	0.682873	0.870415	0.904046	0.938838	0.854914	0.881337	0.806349	0.85823	0.937277	0.960633	0.958091	0.922152	0.989525	0.902948	0.884691	0.876012
1840	0.956654	0.950231	0.94706	0.961195	0.680826	0.868025	0.891329	0.929664	0.850754	0.881712	0.802801	0.864891	0.937277	0.962256	0.954598	0.920253	0.989525	0.911574	0.883761	0.875023
1845	0.957265	0.951281	0.946887	0.962642	0.683385	0.867323	0.900578	0.939857	0.846594	0.883214	0.805602	0.864891	0.938297	0.961039	0.95518	0.918987	0.988827	0.902229	0.884394	0.875653
1850	0.968254	0.949601	0.946543	0.960954	0.675196	0.865495	0.899422	0.921509	0.848154	0.887345	0.804482	0.855376	0.936767	0.961851	0.958091	0.924684	0.992318	0.900791	0.882999	0.874203
1855	0.959707	0.951701	0.945335	0.961195	0.672467	0.869431	0.898266	0.929664	0.854394	0.886219	0.80056	0.85823	0.937787	0.960633	0.956927	0.924684	0.98743	0.910137	0.88311	0.874347
1860	0.96337	0.949601	0.948612	0.962401	0.67622	0.870555	0.900578	0.938838	0.848154	0.88359	0.801867	0.859657	0.937787	0.959416	0.958091	0.91962	0.988128	0.906542	0.883836	0.875126
1865	0.957265	0.950651	0.947232	0.962642	0.677584	0.862825	0.900578	0.933741	0.852834	0.88697	0.799253	0.865366	0.936257	0.961445	0.958673	0.920886	0.988827	0.90151	0.882924	0.874123
1870	0.959096	0.951071	0.948267	0.960231	0.685261	0.867744	0.892486	0.922528	0.846594	0.884341	0.803548	0.866318	0.937277	0.95901	0.959255	0.925316	0.988827	0.906542	0.884412	0.875701
1875	0.960317	0.950651	0.945853	0.960231	0.675537	0.868587	0.894798	0.93476	0.849194	0.88697	0.806162	0.864891	0.935237	0.961445	0.962747	0.918354	0.990922	0.909418	0.883966	0.875263
1880	0.961538	0.950441	0.944473	0.961678	0.678608	0.866198	0.899422	0.931702	0.853354	0.885468	0.804295	0.863463	0.936767	0.960227	0.962165	0.926582	0.989525	0.906542	0.883929	0.875206
1885	0.962149	0.950231	0.949129	0.961919	0.675196	0.868447	0.892486	0.93476	0.851274	0.88021	0.804108	0.863939	0.937787	0.959821	0.960419	0.921519	0.992318	0.910855	0.883984	0.875279
1890	0.962759	0.951071	0.944473	0.962883	0.674343	0.867323	0.895954	0.93476	0.856994	0.878708	0.801494	0.864891	0.936767	0.961039	0.960419	0.925316	0.988827	0.906542	0.883296	0.874557
1895	0.962149	0.950231	0.948267	0.962401	0.67332	0.866058	0.893642	0.931702	0.849194	0.889598	0.80112	0.858706	0.934727	0.961445	0.961583	0.920253	0.989525	0.90798	0.883073	0.874308
1900	0.956654	0.950441	0.94706	0.961678	0.682702	0.865636	0.89711	0.937819	0.856474	0.88697	0.80112	0.867745	0.938297	0.962256	0.961583	0.924684	0.990922	0.90798	0.884691	0.876013
1905	0.972527	0.952121	0.94775	0.960954	0.675196	0.871539	0.894798	0.946993	0.854394	0.887345	0.804855	0.861085	0.935237	0.962256	0.961583	0.926582	0.990223	0.910137	0.885472	0.876876
1910	0.973748	0.950861	0.948439	0.96216	0.675708	0.872523	0.89711	0.940877	0.862194	0.88359	0.802428	0.866318	0.938807	0.961851	0.955763	0.924051	0.990223	0.899353	0.885305	0.876702
1915	0.971306	0.950861	0.94568	0.961436	0.67929	0.870836	0.895954	0.940877	0.853354	0.888472	0.801307	0.860609	0.936767	0.961039	0.958091	0.928481	0.990922	0.906542	0.884914	0.876288
1920	0.962149	0.949811	0.947922	0.961678	0.682702	0.870696	0.893642	0.93578	0.860114	0.882463	0.801307	0.857755	0.939827	0.960633	0.959837	0.91962	0.988128	0.908699	0.884728	0.876067
1925	0.972527	0.950651	0.948439	0.960954	0.67349	0.872101	0.89711	0.93578	0.855954	0.886594	0.808217	0.865842	0.935747	0.962256	0.965076	0.918987	0.990922	0.912293	0.885658	0.877103
1930	0.965201	0.951491	0.949474	0.961919	0.675026	0.867323	0.89711	0.942915	0.848674	0.884341	0.801681	0.86156	0.936257	0.962256	0.954598	0.922785	0.989525	0.910855	0.883891	0.875183
1935	0.967033	0.952121	0.947232	0.96216	0.678437	0.873788	0.90289	0.939857	0.850754	0.882463	0.802801	0.859657	0.940847	0.963068	0.961001	0.921519	0.990922	0.905104	0.885324	0.876714
1940	0.968254	0.950441	0.947405	0.961195	0.679973	0.867182	0.893642	0.93476	0.856994	0.889598	0.803175	0.860609	0.938297	0.961851	0.960419	0.927215	0.989525	0.902948	0.884766	0.87611
1945	0.966422	0.951491	0.946887	0.96216	0.677073	0.868587	0.895954	0.933741	0.857514	0.888096	0.803548	0.85823	0.937277	0.961039	0.958673	0.924051	0.990922	0.902948	0.884412	0.87572
1950	0.968864	0.950861	0.946025	0.960713	0.675026	0.871258	0.895954	0.936799	0.854914	0.882839	0.804108	0.86156	0.936767	0.962662	0.954016	0.929114	0.992318	0.90798	0.884468	0.875793
1955	0.964591	0.951071	0.94775	0.961436	0.674855	0.872523	0.904046	0.942915	0.846074	0.881712	0.79944	0.857755	0.936257	0.959821	0.960419	0.924051	0.99162	0.915888	0.884096	0.875415
1960	0.964591	0.951281	0.947922	0.961919	0.674173	0.87168	0.906358	0.940877	0.851794	0.88021	0.80112	0.864415	0.938807	0.961851	0.959255	0.920886	0.990922	0.905823	0.884319	0.875661
1965	0.970085	0.950651	0.948094	0.960713	0.677073	0.863247	0.894798	0.954128	0.858554	0.88359	0.801867	0.857279	0.935747	0.962256	0.95518	0.927215	0.990922	0.902948	0.883705	0.874959
1970	0.965812	0.950861	0.946543	0.962642	0.679973	0.875474	0.882081	0.948012	0.851274	0.882088	0.799253	0.863939	0.937787	0.962662	0.956927	0.931646	0.989525	0.90798	0.885231	0.876627
1975	0.971917	0.951491	0.949129	0.96216	0.677073	0.876177	0.907514	0.943935	0.854914	0.881337	0.805229	0.856803	0.942886	0.960633	0.954016	0.917089	0.990922	0.909418	0.885882	0.877337
1980	0.968864	0.952121	0.94706	0.963124	0.676902	0.87182	0.894798	0.941896	0.854914	0.889598	0.802428	0.859182	0.942376	0.962256	0.959255	0.923418	0.989525	0.908699	0.885435	0.876858
1985	0.969475	0.951071	0.949819	0.961436	0.677414	0.870134	0.892486	0.949032	0.850754	0.883214	0.801494	0.862036	0.939317	0.961851	0.95518	0.924684	0.990223	0.898634	0.884542	0.875872
1990	0.973138	0.951071	0.950509	0.96216	0.675367	0.871961	0.899422	0.939857	0.853874	0.885468	0.800747	0.864891	0.939827	0.961445	0.956345	0.927215	0.99162	0.910855	0.885472	0.876891
1995	0.970696	0.951281	0.947922	0.961919	0.676049	0.876177	0.887861	0.948012	0.852834	0.885468	0.805229	0.862036	0.939827	0.963068	0.961583	0.931646	0.99162	0.902948	0.886179	0.877655
2000	0.973138	0.951281	0.948439	0.961436	0.668031	0.869852	0.908671	0.945973	0.856474	0.890349	0.803175	0.858706	0.937787	0.961851	0.961583	0.920253	0.98743	0.904385	0.884356	0.875716
2005	0.970085	0.950441	0.949646	0.960713	0.678437	0.870555	0.898266	0.941896	0.849714	0.881337	0.805602	0.861085	0.942376	0.962256	0.956345	0.927215	0.988827	0.897915	0.884989	0.876317
2010	0.968864	0.951701	0.948267	0.961678	0.671273	0.876318	0.887861	0.949032	0.853874	0.880586	0.803922	0.862036	0.937787	0.960633	0.959255	0.924051	0.990223	0.902948	0.88484	0.876221
2015	0.971306	0.951911	0.948267	0.962642	0.670078	0.868587	0.908671	0.956167	0.860114	0.886594	0.802988	0.865842	0.941866	0.961851	0.958673	0.926582	0.990922	0.907261	0.885286	0.876672
2020	0.971306	0.951071	0.948957	0.962401	0.671614	0.873226	0.900578	0.93578	0.847634	0.885092	0.800187	0.866318	0.937787	0.964286	0.958091	0.925316	0.988827	0.900791	0.884449	0.87581
2025	0.968254	0.951281	0.947232	0.961195	0.675026	0.871539	0.904046	0.948012	0.852314	0.885468	0.802428	0.855376	0.937787	0.961039	0.959837	0.929114	0.988827	0.903666	0.884598	0.87594
2030	0.964591	0.951491	0.947405	0.961919	0.66752	0.87168	0.898266	0.939857	0.853874	0.886594	0.805042	0.860133	0.939317	0.962662	0.962747	0.924684	0.989525	0.910137	0.884375	0.875738
2035	0.970696	0.950021	0.948267	0.961678	0.674173	0.872101	0.904046	0.945973	0.852834	0.884341	0.806349	0.859182	0.934727	0.962662	0.958091	0.922785	0.989525	0.902948	0.884877	0.876235
2040	0.969475	0.951491	0.949819	0.963124	0.675537	0.872804	0.900578	0.945973	0.860114	0.883214	0.803548	0.858706	0.938297	0.962662	0.957509	0.918354	0.988128	0.899353	0.885193	0.876581
2045	0.968864	0.950441	0.947922	0.961678	0.672467	0.874912	0.89711	0.943935	0.854914	0.884341	0.802988	0.865842	0.937787	0.962662	0.965658	0.91962	0.989525	0.907261	0.885231	0.876644
2050	0.973138	0.951491	0.948439	0.962642	0.67929	0.873226	0.899422	0.954128	0.856994	0.892227	0.803361	0.862988	0.936767	0.963474	0.959837	0.922152	0.989525	0.908699	0.886644	0.878126
2055	0.969475	0.951281	0.948267	0.96216	0.680996	0.872663	0.89711	0.944954	0.857514	0.889974	0.804108	0.860133	0.941356	0.962256	0.961583	0.93038	0.989525	0.906542	0.886589	0.878078
2060	0.976801	0.951911	0.947232	0.962642	0.68202	0.873788	0.904046	0.95209	0.855954	0.885092	0.809711	0.866794	0.936767	0.961851	0.961583	0.925316	0.990223	0.908699	0.887556	0.879083
2065	0.969475	0.952331	0.948612	0.961919	0.684408	0.873085	0.894798	0.945973	0.854394	0.883214	0.803361	0.864415	0.936257	0.96388	0.962165	0.927848	0.989525	0.908699	0.886644	0.878122
2070	0.971917	0.951071	0.949474	0.960954	0.678608	0.874912	0.904046	0.948012	0.856474	0.889974	0.810831	0.862036	0.941866	0.962256	0.963912	0.932278	0.990922	0.907261	0.887798	0.879377
2075	0.97619	0.950231	0.94706	0.96216	0.681167	0.872382	0.891329	0.939857	0.854914	0.884716	0.809711	0.866794	0.935747	0.965097	0.960419	0.933544	0.986732	0.912293	0.886886	0.878361
2080	0.974359	0.951701	0.94706	0.960713	0.67349	0.873226	0.894798	0.95107	0.859594	0.8911	0.804855	0.866794	0.938807	0.961445	0.963329	0.93038	0.988128	0.905104	0.886179	0.877654
2085	0.970085	0.951701	0.948094	0.96216	0.679632	0.873507	0.906358	0.948012	0.854914	0.890725	0.802054	0.862512	0.941356	0.965503	0.961583	0.93038	0.990223	0.899353	0.886607	0.878094
2090	0.973138	0.952331	0.948612	0.961678	0.679461	0.874912	0.909827	0.945973	0.860114	0.884716	0.802801	0.867269	0.939827	0.961851	0.961583	0.925949	0.989525	0.90798	0.886961	0.878498
2095	0.973748	0.952331	0.948784	0.963124	0.67929	0.877161	0.89711	0.95107	0.865835	0.891476	0.805042	0.865842	0.936767	0.964286	0.956345	0.928481	0.990223	0.908699	0.887928	0.879538
2100	0.978632	0.951701	0.94706	0.96216	0.676049	0.875474	0.899422	0.95209	0.860634	0.895982	0.804295	0.860609	0.942886	0.96388	0.954016	0.928481	0.990223	0.909418	0.887147	0.878714
2105	0.976801	0.951701	0.949819	0.961195	0.682702	0.879831	0.895954	0.95209	0.857514	0.8911	0.806723	0.869172	0.942886	0.965097	0.962165	0.929114	0.98743	0.905823	0.888951	0.880606
2110	0.976801	0.952121	0.950509	0.96216	0.674855	0.875053	0.901734	0.95209	0.865315	0.88697	0.806723	0.861085	0.939827	0.963474	0.961583	0.932278	0.989525	0.907261	0.887481	0.879067
2115	0.977411	0.951701	0.946543	0.961919	0.675367	0.875755	0.89711	0.948012	0.859594	0.889598	0.811204	0.862988	0.944416	0.964286	0.958091	0.925949	0.988827	0.905104	0.887295	0.87884
2120	0.977411	0.951491	0.952061	0.962642	0.680826	0.872523	0.895954	0.953109	0.861674	0.888472	0.806162	0.861085	0.946456	0.963068	0.964494	0.929114	0.990223	0.908699	0.888058	0.879655
2125	0.97619	0.951701	0.949129	0.960954	0.680143	0.872804	0.900578	0.948012	0.859074	0.888096	0.804108	0.862988	0.938807	0.961851	0.961583	0.922785	0.989525	0.905823	0.886589	0.878087
2130	0.974969	0.953381	0.950164	0.962642	0.671784	0.875334	0.909827	0.943935	0.862194	0.887721	0.809337	0.860133	0.940337	0.965097	0.960419	0.923418	0.99162	0.903666	0.887128	0.878692
2135	0.982295	0.952751	0.948439	0.961436	0.674173	0.878566	0.899422	0.955148	0.864795	0.890725	0.807843	0.867745	0.940337	0.965097	0.962165	0.93038	0.990223	0.90798	0.888467	0.880125
2140	0.979243	0.951491	0.947232	0.962883	0.683555	0.870134	0.90289	0.963303	0.854394	0.886219	0.806349	0.864415	0.941866	0.967532	0.96624	0.932278	0.990922	0.912293	0.887965	0.879538
2145	0.977411	0.951701	0.948612	0.961678	0.677584	0.874912	0.89711	0.955148	0.859594	0.88697	0.804855	0.863463	0.938807	0.965503	0.960419	0.931646	0.992318	0.904385	0.887184	0.87872
2150	0.97558	0.952541	0.949991	0.962642	0.682702	0.875053	0.90289	0.950051	0.860634	0.880961	0.806909	0.859182	0.943396	0.96388	0.959255	0.933544	0.989525	0.915169	0.888095	0.879686
2155	0.976801	0.952331	0.94775	0.961678	0.676731	0.874772	0.913295	0.957187	0.854914	0.886594	0.805602	0.862036	0.941356	0.963068	0.959837	0.927215	0.992318	0.904385	0.886979	0.878479
2160	0.97558	0.952751	0.951198	0.961919	0.676902	0.878004	0.899422	0.954128	0.859074	0.884341	0.807096	0.866318	0.941356	0.961851	0.962747	0.934177	0.990922	0.905104	0.888114	0.879733
2165	0.978022	0.952751	0.949991	0.962883	0.671955	0.873647	0.907514	0.95209	0.860114	0.885468	0.808964	0.864891	0.943396	0.966315	0.962165	0.927848	0.988827	0.908699	0.887444	0.879024
2170	0.979853	0.951071	0.952061	0.963606	0.677073	0.872663	0.901734	0.958206	0.861674	0.889598	0.80747	0.866794	0.936767	0.963474	0.961001	0.933544	0.989525	0.910855	0.888095	0.879703
2175	0.979853	0.952121	0.949474	0.96216	0.677755	0.879269	0.900578	0.960245	0.863235	0.890349	0.807843	0.864415	0.937787	0.967127	0.96624	0.924684	0.99162	0.912293	0.889007	0.88069
2180	0.978022	0.951491	0.950509	0.96216	0.674002	0.875755	0.895954	0.958206	0.861154	0.88697	0.808964	0.86156	0.941356	0.965909	0.956927	0.932911	0.990223	0.909418	0.887686	0.879255
2185	0.977411	0.951701	0.950509	0.961436	0.678437	0.880112	0.906358	0.961264	0.861674	0.88359	0.810831	0.868221	0.939317	0.96875	0.959837	0.93481	0.992318	0.908699	0.889453	0.881138
2190	0.976801	0.952331	0.953958	0.962401	0.675026	0.877161	0.894798	0.958206	0.856994	0.887345	0.808777	0.865842	0.936767	0.966721	0.959255	0.931013	0.990922	0.913731	0.88843	0.88005
2195	0.978022	0.952121	0.950854	0.96216	0.678437	0.874491	0.909827	0.962283	0.863235	0.888096	0.802054	0.861085	0.945436	0.965097	0.956927	0.933544	0.990223	0.906542	0.887872	0.879453
2200	0.979243	0.953171	0.949474	0.963124	0.684408	0.877442	0.901734	0.958206	0.863235	0.884716	0.807656	0.868221	0.939827	0.967532	0.959837	0.932911	0.990922	0.90798	0.889472	0.881184
2205	0.978632	0.952541	0.953785	0.961919	0.676561	0.877161	0.901734	0.959225	0.866355	0.886594	0.806162	0.868221	0.941866	0.966315	0.961583	0.931013	0.990223	0.910855	0.889025	0.880705
2210	0.979243	0.951491	0.952923	0.963124	0.680314	0.875193	0.899422	0.962283	0.862715	0.88697	0.809337	0.863463	0.938807	0.967938	0.958673	0.936076	0.989525	0.909418	0.8891	0.880758
2215	0.97619	0.950861	0.950164	0.961678	0.67349	0.876037	0.898266	0.959225	0.866875	0.885092	0.812885	0.868696	0.943906	0.967938	0.958091	0.937975	0.99162	0.902229	0.888542	0.880196
2220	0.97619	0.953171	0.951198	0.96216	0.678949	0.876739	0.905202	0.963303	0.859594	0.891476	0.809897	0.863463	0.938807	0.969562	0.960419	0.933544	0.988128	0.91445	0.889379	0.881076
2225	0.980464	0.952541	0.953268	0.962401	0.676561	0.876458	0.900578	0.963303	0.863235	0.890349	0.80803	0.862988	0.943396	0.969562	0.965658	0.932911	0.990922	0.905104	0.889342	0.881046
2230	0.978022	0.952541	0.952061	0.96216	0.676902	0.876739	0.901734	0.966361	0.862715	0.888847	0.808777	0.863463	0.942376	0.967938	0.959837	0.932911	0.990223	0.900791	0.888839	0.8805
2235	0.976801	0.952961	0.953095	0.962642	0.683043	0.871961	0.909827	0.966361	0.861674	0.889223	0.808403	0.865842	0.941866	0.965909	0.962165	0.941772	0.990922	0.911574	0.889714	0.881435
2240	0.974969	0.952541	0.950681	0.962883	0.680314	0.876599	0.90289	0.964322	0.863235	0.891851	0.808964	0.865842	0.941866	0.969562	0.964494	0.939241	0.988827	0.90798	0.889807	0.881521
2245	0.979853	0.951911	0.952061	0.961919	0.679461	0.876177	0.913295	0.960245	0.860634	0.889223	0.810271	0.863939	0.939827	0.964286	0.964494	0.934177	0.990223	0.909418	0.88936	0.881035
2250	0.979853	0.953171	0.949474	0.961678	0.678096	0.880534	0.898266	0.9684	0.861674	0.889598	0.808777	0.867269	0.938807	0.966721	0.959837	0.935443	0.992318	0.909418	0.889565	0.881272
2255	0.980464	0.951701	0.951198	0.963365	0.678267	0.871961	0.898266	0.957187	0.863235	0.889598	0.807096	0.867269	0.936257	0.96875	0.962747	0.936076	0.989525	0.916607	0.88856	0.880214
2260	0.979853	0.952331	0.952578	0.961919	0.678779	0.875193	0.900578	0.961264	0.863755	0.890725	0.806723	0.864891	0.939317	0.966315	0.959255	0.933544	0.990223	0.907261	0.888765	0.880403
2265	0.977411	0.953171	0.951198	0.963124	0.680826	0.877442	0.908671	0.962283	0.865835	0.885843	0.810458	0.862036	0.942886	0.968344	0.963912	0.935443	0.990223	0.915888	0.890123	0.881878
2270	0.977411	0.951701	0.951198	0.962642	0.680484	0.873226	0.900578	0.957187	0.859074	0.889598	0.811391	0.864891	0.939827	0.96875	0.961583	0.934177	0.990922	0.913731	0.889044	0.880704
2275	0.979853	0.953801	0.951026	0.962401	0.673831	0.878988	0.908671	0.964322	0.863235	0.887345	0.810458	0.866318	0.941356	0.964692	0.964494	0.93481	0.990223	0.920201	0.889695	0.88146
2280	0.978632	0.952961	0.949819	0.961919	0.674173	0.877864	0.898266	0.962283	0.865315	0.889223	0.807096	0.866318	0.939827	0.967127	0.95518	0.932911	0.990223	0.910137	0.888374	0.880002
2285	0.97619	0.952331	0.953095	0.963365	0.676561	0.876177	0.908671	0.960245	0.860114	0.889974	0.813445	0.864415	0.935747	0.967127	0.958091	0.932911	0.992318	0.911574	0.889323	0.88101
2290	0.979853	0.954221	0.949819	0.961678	0.67059	0.870555	0.909827	0.962283	0.859074	0.889598	0.806723	0.860133	0.937277	0.969562	0.964494	0.929747	0.990922	0.90798	0.887035	0.878559
2295	0.976801	0.951281	0.950336	0.961919	0.67622	0.875474	0.895954	0.958206	0.862715	0.88359	0.80859	0.869172	0.940847	0.965909	0.959255	0.933544	0.990922	0.906542	0.887965	0.87953
2300	0.977411	0.952331	0.951888	0.962401	0.68509	0.875755	0.906358	0.959225	0.861674	0.891851	0.806723	0.861085	0.936257	0.966721	0.958673	0.932911	0.990223	0.905104	0.889118	0.880772
2305	0.979853	0.952751	0.950509	0.962401	0.680484	0.87955	0.90289	0.957187	0.862715	0.889598	0.806162	0.860133	0.939827	0.965909	0.961001	0.935443	0.99162	0.912293	0.889286	0.880967
2310	0.976801	0.952961	0.949129	0.963124	0.676902	0.875615	0.910983	0.957187	0.862194	0.892978	0.808403	0.864415	0.941866	0.966315	0.963329	0.934177	0.990223	0.905104	0.888783	0.880445
2315	0.97558	0.952751	0.951543	0.962401	0.676902	0.872804	0.906358	0.963303	0.866355	0.888847	0.811951	0.863463	0.940337	0.966721	0.963329	0.932278	0.989525	0.913731	0.888969	0.880614
2320	0.978632	0.953171	0.94775	0.962883	0.677584	0.87702	0.913295	0.956167	0.858554	0.887345	0.808964	0.868696	0.940337	0.966315	0.959255	0.931646	0.992318	0.905104	0.888579	0.880189
2325	0.976801	0.953381	0.949474	0.962642	0.67349	0.877442	0.89711	0.956167	0.861674	0.890349	0.806723	0.863939	0.939827	0.965503	0.962747	0.93481	0.990922	0.905823	0.888039	0.879649
2330	0.978632	0.952961	0.949819	0.962401	0.678267	0.871539	0.894798	0.957187	0.858034	0.885092	0.810831	0.859182	0.942376	0.964692	0.959837	0.93481	0.988827	0.910855	0.887667	0.879214
2335	0.977411	0.952331	0.948094	0.962642	0.678437	0.878285	0.909827	0.950051	0.865835	0.888472	0.80915	0.864415	0.941866	0.968344	0.963329	0.932911	0.990223	0.912293	0.889193	0.880885
2340	0.979243	0.952961	0.947922	0.961678	0.678949	0.879129	0.900578	0.957187	0.859074	0.895231	0.808403	0.868696	0.942376	0.965097	0.955763	0.933544	0.990922	0.897915	0.888839	0.880477
2345	0.978022	0.952541	0.950854	0.962401	0.669055	0.875755	0.905202	0.96738	0.858034	0.888472	0.80747	0.865842	0.945436	0.965503	0.965658	0.937342	0.990922	0.908699	0.888132	0.879768
2350	0.977411	0.952331	0.950854	0.963847	0.67349	0.881518	0.906358	0.956167	0.862715	0.889598	0.811578	0.862512	0.939827	0.967532	0.959837	0.93481	0.989525	0.90798	0.889342	0.881064
2355	0.978632	0.952331	0.950336	0.960713	0.674343	0.875193	0.904046	0.969419	0.868435	0.889598	0.809897	0.865842	0.939827	0.965503	0.960419	0.93481	0.99162	0.913731	0.888839	0.88052
2360	0.978022	0.952541	0.950509	0.961678	0.672467	0.878285	0.898266	0.963303	0.859594	0.891851	0.806723	0.875357	0.940337	0.967127	0.959255	0.924051	0.990922	0.906542	0.888318	0.87996
2365	0.976801	0.954011	0.949646	0.961195	0.674173	0.881096	0.905202	0.956167	0.864275	0.893353	0.806909	0.869648	0.940847	0.966721	0.962165	0.927848	0.990922	0.904385	0.889007	0.880696
2370	0.97619	0.952751	0.950336	0.961678	0.676731	0.876037	0.906358	0.958206	0.865835	0.887345	0.810084	0.868221	0.940847	0.965097	0.965076	0.931013	0.988827	0.908699	0.888839	0.880483
2375	0.977411	0.953381	0.950509	0.964088	0.672467	0.878285	0.899422	0.970438	0.856474	0.892602	0.808777	0.863463	0.941356	0.967938	0.962747	0.938608	0.990922	0.913012	0.889156	0.880863
2380	0.979243	0.953171	0.952061	0.96216	0.674002	0.876458	0.900578	0.956167	0.866875	0.888096	0.806349	0.866794	0.941356	0.966315	0.962165	0.927848	0.989525	0.908699	0.888374	0.880026
2385	0.976801	0.952541	0.951543	0.963124	0.674684	0.874491	0.894798	0.964322	0.863755	0.893353	0.806723	0.866794	0.938297	0.965097	0.964494	0.929114	0.990223	0.910137	0.888318	0.879939
2390	0.97619	0.953801	0.948439	0.962401	0.67349	0.878426	0.907514	0.961264	0.860634	0.890349	0.808217	0.863939	0.935237	0.967532	0.958673	0.932911	0.988827	0.907261	0.888151	0.879777
2395	0.976801	0.953801	0.949129	0.960954	0.673661	0.878426	0.913295	0.958206	0.865315	0.888096	0.805042	0.872978	0.942376	0.965909	0.963329	0.933544	0.99162	0.905104	0.888653	0.880345
2400	0.978632	0.952751	0.951198	0.960954	0.677926	0.880112	0.910983	0.960245	0.870515	0.883965	0.806536	0.863939	0.940847	0.966721	0.956927	0.939241	0.990922	0.90798	0.889304	0.881004
2405	0.976801	0.951281	0.951543	0.960954	0.673831	0.878566	0.908671	0.959225	0.862715	0.887721	0.807096	0.866318	0.942886	0.966315	0.963329	0.932911	0.990922	0.90798	0.888579	0.880242
2410	0.974969	0.953591	0.950336	0.962401	0.674855	0.878285	0.89711	0.965341	0.855954	0.888472	0.809524	0.866794	0.943906	0.967532	0.961583	0.935443	0.990223	0.916607	0.889081	0.880776
2415	0.979243	0.952751	0.950509	0.962883	0.679632	0.880112	0.898266	0.955148	0.868435	0.888847	0.810644	0.869172	0.938297	0.966315	0.958673	0.932911	0.988827	0.913012	0.8899	0.881631
2420	0.976801	0.953801	0.95275	0.960231	0.671443	0.87688	0.899422	0.964322	0.865315	0.887345	0.806909	0.868696	0.939317	0.965503	0.958673	0.940506	0.992318	0.916607	0.888653	0.880311
2425	0.976801	0.952541	0.949474	0.963847	0.677584	0.877161	0.905202	0.962283	0.862715	0.886219	0.811391	0.864891	0.938807	0.968344	0.958091	0.931013	0.988827	0.916607	0.8891	0.880771
2430	0.978022	0.951701	0.94775	0.961919	0.677584	0.878848	0.894798	0.96738	0.863755	0.894104	0.811018	0.87393	0.941866	0.966721	0.960419	0.937342	0.990223	0.911574	0.889825	0.881569
2435	0.980464	0.952541	0.950681	0.961919	0.672637	0.87435	0.904046	0.958206	0.859594	0.888096	0.807283	0.86156	0.940337	0.965909	0.965658	0.928481	0.988827	0.912293	0.88763	0.87921
2440	0.978632	0.952541	0.949646	0.960713	0.678437	0.875193	0.899422	0.962283	0.859074	0.887345	0.805602	0.862988	0.943396	0.966315	0.958091	0.932278	0.990223	0.910855	0.887946	0.879546
2445	0.977411	0.954011	0.949991	0.961919	0.669396	0.878566	0.90289	0.963303	0.859594	0.883214	0.810084	0.864415	0.941356	0.967127	0.961001	0.932911	0.990223	0.909418	0.888058	0.879678
2450	0.978632	0.952121	0.949991	0.961678	0.67349	0.879691	0.905202	0.96738	0.860114	0.888847	0.808217	0.863939	0.941356	0.965097	0.963912	0.931646	0.988827	0.910855	0.888672	0.88034
2455	0.976801	0.952541	0.949302	0.962401	0.674514	0.877864	0.904046	0.958206	0.860114	0.883214	0.807096	0.865366	0.936767	0.965503	0.956927	0.929747	0.990922	0.91445	0.887705	0.879303
2460	0.978632	0.953381	0.947577	0.961678	0.675026	0.878426	0.89711	0.959225	0.862194	0.888847	0.80747	0.862988	0.935747	0.967127	0.962165	0.923418	0.989525	0.910137	0.887798	0.879374
2465	0.974969	0.953801	0.951026	0.961436	0.673661	0.873788	0.910983	0.957187	0.866875	0.883965	0.808964	0.869172	0.938807	0.964692	0.963912	0.932911	0.990922	0.908699	0.888151	0.879763
2470	0.978022	0.953171	0.949474	0.963124	0.672979	0.879129	0.900578	0.961264	0.861674	0.880961	0.809337	0.871075	0.938807	0.96875	0.961583	0.931013	0.989525	0.916607	0.88869	0.880357
2475	0.979243	0.951911	0.951888	0.963124	0.678608	0.873226	0.901734	0.955148	0.856994	0.889223	0.807843	0.867269	0.939317	0.965909	0.962747	0.931013	0.990922	0.910855	0.888374	0.879996
2480	0.97619	0.952751	0.950164	0.960472	0.670078	0.880253	0.898266	0.955148	0.856994	0.890349	0.805415	0.863463	0.940337	0.967532	0.965658	0.931013	0.99162	0.907261	0.887705	0.879334
2485	0.979853	0.952331	0.949302	0.961678	0.672296	0.881096	0.893642	0.963303	0.866355	0.887345	0.806162	0.864891	0.938807	0.965909	0.961001	0.935443	0.990223	0.908699	0.888374	0.880029
2490	0.978022	0.952331	0.951026	0.96216	0.675537	0.876037	0.890173	0.958206	0.855954	0.888096	0.810831	0.863463	0.941866	0.967938	0.954598	0.934177	0.988827	0.915169	0.888244	0.879838
2495	0.977411	0.952121	0.949302	0.961678	0.677584	0.877301	0.901734	0.965341	0.859594	0.889223	0.80915	0.866318	0.941866	0.965097	0.959255	0.93038	0.989525	0.90798	0.88856	0.880215
2500	0.979243	0.952751	0.951026	0.961919	0.672808	0.873647	0.90289	0.949032	0.858554	0.888847	0.806909	0.863463	0.938807	0.96388	0.961001	0.928481	0.988827	0.908699	0.887035	0.878569
2505	0.974969	0.952331	0.949991	0.961678	0.675026	0.876739	0.899422	0.959225	0.857514	0.892978	0.805602	0.869648	0.936767	0.965097	0.959255	0.929747	0.990223	0.905104	0.887705	0.87929
2510	0.979853	0.952541	0.951716	0.961919	0.674002	0.879129	0.90289	0.962283	0.868435	0.889974	0.810458	0.860609	0.939827	0.965097	0.958091	0.936709	0.990922	0.905104	0.889062	0.880718
2515	0.976801	0.951911	0.949474	0.963606	0.673149	0.875755	0.900578	0.954128	0.856994	0.887345	0.805976	0.867745	0.940847	0.967938	0.956345	0.932911	0.990223	0.905823	0.88737	0.87892
2520	0.97558	0.952121	0.948957	0.962642	0.674343	0.878988	0.904046	0.956167	0.859594	0.886594	0.808403	0.866318	0.939317	0.965097	0.958091	0.933544	0.990223	0.912293	0.88817	0.879805
2525	0.97558	0.951911	0.948784	0.962642	0.673831	0.876458	0.907514	0.962283	0.859074	0.887721	0.808217	0.862512	0.944416	0.964286	0.959837	0.931013	0.990922	0.910855	0.887891	0.879488
2530	0.97558	0.952541	0.953095	0.962642	0.674514	0.878426	0.907514	0.959225	0.868435	0.8911	0.806349	0.857279	0.941866	0.968344	0.960419	0.931646	0.992318	0.906542	0.888858	0.880557
2535	0.981074	0.951071	0.949646	0.963606	0.675708	0.878848	0.909827	0.960245	0.856474	0.887345	0.811204	0.868221	0.941866	0.965097	0.96624	0.93038	0.990223	0.907261	0.8891	0.880796
2540	0.977411	0.951911	0.950164	0.96216	0.666837	0.876739	0.904046	0.953109	0.860634	0.885092	0.80803	0.864891	0.938807	0.967127	0.958673	0.933544	0.992318	0.909418	0.887072	0.878638
2545	0.977411	0.952121	0.949991	0.960713	0.660867	0.873366	0.89711	0.964322	0.858034	0.892978	0.80803	0.871551	0.937787	0.96388	0.959837	0.926582	0.990922	0.915888	0.886291	0.877828
2550	0.974969	0.952751	0.952233	0.963365	0.669567	0.880253	0.907514	0.965341	0.860114	0.886594	0.806909	0.865366	0.937277	0.967532	0.965658	0.935443	0.990223	0.910855	0.888616	0.8803
2555	0.977411	0.953171	0.949991	0.961678	0.672808	0.879831	0.901734	0.959225	0.865835	0.886219	0.804669	0.864891	0.936257	0.964692	0.958091	0.928481	0.99162	0.909418	0.887779	0.879402
2560	0.977411	0.951701	0.949991	0.961678	0.668884	0.875474	0.906358	0.958206	0.854914	0.889974	0.808217	0.867269	0.941356	0.967532	0.965076	0.941772	0.990223	0.910137	0.887853	0.879462
2565	0.97558	0.952541	0.951198	0.962642	0.678437	0.874631	0.899422	0.957187	0.861154	0.885092	0.805976	0.867269	0.937787	0.967938	0.961583	0.928481	0.988827	0.910855	0.888002	0.879602
2570	0.976801	0.952331	0.95344	0.96216	0.672637	0.878707	0.907514	0.954128	0.859594	0.884341	0.80915	0.866318	0.938297	0.966315	0.956345	0.924051	0.990223	0.90798	0.888002	0.879588
2575	0.978022	0.953381	0.948784	0.962401	0.67332	0.877442	0.899422	0.959225	0.856994	0.888472	0.810644	0.863939	0.937787	0.964692	0.962165	0.933544	0.990922	0.90798	0.888077	0.879714
2580	0.971917	0.952751	0.949474	0.960713	0.67349	0.874912	0.905202	0.962283	0.852834	0.893353	0.809337	0.859182	0.937787	0.964692	0.954598	0.935443	0.989525	0.916607	0.887388	0.878951
2585	0.97558	0.951701	0.952061	0.961678	0.672808	0.877864	0.894798	0.960245	0.859074	0.885843	0.803175	0.863939	0.937277	0.964692	0.953434	0.931013	0.990922	0.913731	0.887072	0.878625
2590	0.976801	0.951701	0.951198	0.960713	0.674514	0.878848	0.894798	0.963303	0.864795	0.886594	0.80859	0.864415	0.941356	0.966315	0.961001	0.933544	0.990922	0.911574	0.888597	0.880249
2595	0.979243	0.952541	0.951026	0.96216	0.667861	0.87941	0.899422	0.961264	0.857514	0.885092	0.807096	0.863463	0.939827	0.965503	0.961001	0.928481	0.989525	0.915169	0.887519	0.87913
2600	0.97619	0.952121	0.94706	0.961678	0.67349	0.874631	0.908671	0.956167	0.860114	0.890349	0.804482	0.86156	0.943396	0.966315	0.963912	0.938608	0.989525	0.90798	0.887351	0.878921
2605	0.976801	0.952541	0.949302	0.963124	0.669396	0.882642	0.901734	0.958206	0.861674	0.88359	0.805042	0.863463	0.939317	0.965909	0.959255	0.941139	0.99162	0.908699	0.887984	0.87964
2610	0.977411	0.952541	0.951371	0.961678	0.671273	0.880394	0.906358	0.956167	0.855954	0.886219	0.806536	0.865366	0.935747	0.965503	0.967404	0.937342	0.990922	0.910855	0.888244	0.8799
2615	0.978632	0.952541	0.950509	0.961436	0.669737	0.877583	0.910983	0.961264	0.862194	0.882463	0.809711	0.870124	0.935237	0.967532	0.963912	0.934177	0.989525	0.915169	0.888281	0.879948
2620	0.976801	0.952331	0.950336	0.961919	0.672979	0.876599	0.894798	0.953109	0.862194	0.884716	0.805602	0.867269	0.940847	0.964692	0.959255	0.927848	0.988827	0.902948	0.887035	0.878582
2625	0.977411	0.951071	0.949991	0.963124	0.666325	0.876177	0.899422	0.96738	0.861154	0.888472	0.806162	0.85823	0.936257	0.965909	0.960419	0.932278	0.989525	0.90798	0.886607	0.878162
2630	0.976801	0.952541	0.949302	0.961678	0.671955	0.877864	0.898266	0.961264	0.860114	0.888847	0.80803	0.866794	0.938297	0.964286	0.959837	0.933544	0.990922	0.907261	0.887779	0.879359
2635	0.976801	0.952961	0.949819	0.963124	0.672296	0.878004	0.905202	0.954128	0.854914	0.88359	0.807843	0.862512	0.936767	0.967532	0.958673	0.931013	0.989525	0.915888	0.887556	0.87916
2640	0.977411	0.951911	0.950336	0.96216	0.669396	0.880253	0.914451	0.957187	0.851274	0.884341	0.809337	0.863463	0.935237	0.967127	0.956927	0.932911	0.989525	0.90798	0.887463	0.879027
2645	0.981074	0.952121	0.95275	0.963365	0.669226	0.872804	0.90289	0.962283	0.863235	0.88359	0.807096	0.868221	0.937787	0.965503	0.964494	0.929114	0.990922	0.905104	0.887314	0.878881
2650	0.97619	0.951491	0.950681	0.961436	0.67332	0.875615	0.90289	0.964322	0.867395	0.88697	0.810084	0.862036	0.935237	0.964286	0.961583	0.931013	0.990223	0.90798	0.887835	0.879449
2655	0.973748	0.952541	0.951198	0.961436	0.674002	0.872242	0.908671	0.959225	0.852314	0.886219	0.805976	0.862512	0.939827	0.966315	0.967404	0.935443	0.990922	0.902229	0.887016	0.878548
2660	0.978022	0.952121	0.95275	0.963606	0.667178	0.875755	0.905202	0.961264	0.865315	0.889223	0.805415	0.86156	0.937277	0.965909	0.961001	0.93481	0.990223	0.910855	0.887537	0.87915
2665	0.979853	0.953801	0.949129	0.96216	0.672467	0.872944	0.893642	0.958206	0.858034	0.888472	0.804108	0.866318	0.940847	0.963068	0.964494	0.932278	0.990223	0.908699	0.886942	0.878487
2670	0.978632	0.952961	0.949129	0.961678	0.666155	0.870696	0.900578	0.948012	0.855954	0.886594	0.804482	0.863939	0.936257	0.965909	0.965076	0.929747	0.990223	0.912293	0.88551	0.876959
2675	0.977411	0.951491	0.950509	0.961436	0.664961	0.87435	0.895954	0.955148	0.853874	0.888096	0.804669	0.870124	0.938297	0.965909	0.964494	0.931646	0.990223	0.905823	0.886086	0.877579
2680	0.978022	0.953381	0.953095	0.96216	0.668031	0.878988	0.90289	0.956167	0.861674	0.884716	0.806349	0.867745	0.938297	0.966721	0.965076	0.934177	0.990223	0.910855	0.888132	0.879784
2685	0.976801	0.950861	0.949474	0.961678	0.667349	0.878707	0.906358	0.959225	0.858554	0.887721	0.806349	0.862036	0.935747	0.965909	0.961583	0.93038	0.990922	0.900072	0.886644	0.87818
2690	0.973138	0.951701	0.949991	0.962883	0.671273	0.877161	0.906358	0.958206	0.859074	0.885843	0.802241	0.871075	0.942376	0.967938	0.960419	0.929747	0.990922	0.907261	0.887295	0.878865
2695	0.973138	0.952121	0.947922	0.960472	0.672467	0.876739	0.908671	0.959225	0.855434	0.885843	0.806536	0.863939	0.938807	0.964692	0.963329	0.93481	0.989525	0.908699	0.887035	0.878582
2700	0.973138	0.953381	0.951026	0.963124	0.669567	0.875334	0.90289	0.954128	0.858034	0.885092	0.806909	0.862036	0.936257	0.965503	0.963329	0.931646	0.988827	0.904385	0.886737	0.87827
2705	0.974969	0.952961	0.951198	0.962401	0.671955	0.876599	0.905202	0.959225	0.859594	0.888472	0.801867	0.863939	0.939827	0.96875	0.962747	0.932911	0.989525	0.91445	0.887649	0.879256
2710	0.97558	0.952961	0.950854	0.961195	0.66479	0.877301	0.905202	0.958206	0.853874	0.887721	0.803361	0.864891	0.938297	0.965503	0.961583	0.932911	0.990223	0.90798	0.886384	0.8779
2715	0.978022	0.952331	0.948612	0.961919	0.666325	0.874631	0.899422	0.956167	0.852834	0.890349	0.805976	0.865366	0.936767	0.963068	0.961001	0.931646	0.99162	0.910137	0.886142	0.877644
2720	0.97558	0.950861	0.950164	0.961436	0.672808	0.874912	0.901734	0.962283	0.861154	0.885092	0.804855	0.864891	0.938297	0.966721	0.958673	0.936076	0.988827	0.906542	0.886979	0.878496
2725	0.979243	0.952121	0.949819	0.960713	0.67639	0.871258	0.910983	0.963303	0.858034	0.885468	0.806162	0.862988	0.940847	0.965909	0.959255	0.929114	0.990922	0.90798	0.887109	0.878645
2730	0.97619	0.951491	0.95275	0.962642	0.671614	0.878848	0.89711	0.960245	0.858554	0.885468	0.809337	0.862988	0.936767	0.966721	0.96624	0.93038	0.988128	0.902948	0.887909	0.879545
2735	0.97619	0.951491	0.948784	0.961678	0.665473	0.878285	0.907514	0.954128	0.857514	0.886594	0.802614	0.868696	0.940337	0.966315	0.963329	0.934177	0.990922	0.909418	0.886663	0.878241
2740	0.979243	0.953381	0.950681	0.962642	0.670761	0.875474	0.906358	0.957187	0.859594	0.889598	0.804108	0.866794	0.933197	0.963474	0.959837	0.931013	0.99162	0.900072	0.886923	0.878464
2745	0.978022	0.951071	0.950164	0.961919	0.672126	0.875755	0.904046	0.953109	0.849194	0.884341	0.802801	0.865366	0.934217	0.964286	0.961583	0.932911	0.990223	0.910855	0.886254	0.877766
2750	0.976801	0.952331	0.949302	0.960472	0.676049	0.876037	0.912139	0.960245	0.859074	0.885843	0.805976	0.862512	0.938807	0.967127	0.961001	0.927215	0.990922	0.915169	0.887723	0.87933
2755	0.978632	0.951071	0.950164	0.961436	0.668373	0.878988	0.895954	0.960245	0.859594	0.884716	0.803735	0.864415	0.937787	0.961851	0.959837	0.931646	0.990922	0.904385	0.886477	0.877993
2760	0.978632	0.952961	0.951716	0.961678	0.670931	0.880534	0.898266	0.961264	0.852834	0.885468	0.805789	0.864891	0.939317	0.965503	0.958673	0.931013	0.988827	0.918045	0.887853	0.879494
2765	0.97619	0.952541	0.951198	0.962883	0.669567	0.87955	0.895954	0.958206	0.859594	0.883965	0.80747	0.863939	0.937277	0.966315	0.961583	0.93038	0.990223	0.912293	0.88763	0.879233
2770	0.979853	0.952961	0.952233	0.962401	0.67042	0.876458	0.901734	0.959225	0.856474	0.882839	0.802241	0.863939	0.938807	0.965097	0.961001	0.931646	0.990223	0.907261	0.886849	0.878403
2775	0.97558	0.951911	0.951716	0.961678	0.666325	0.875896	0.906358	0.960245	0.856474	0.886219	0.800934	0.864891	0.938807	0.964286	0.962165	0.932278	0.989525	0.909418	0.886217	0.877746
2780	0.978022	0.952751	0.951543	0.960713	0.669226	0.87941	0.907514	0.95107	0.861154	0.884341	0.804295	0.861085	0.938297	0.965097	0.962747	0.925316	0.988827	0.910855	0.887016	0.878597
2785	0.972527	0.951491	0.951371	0.961678	0.670249	0.881799	0.912139	0.957187	0.859594	0.889223	0.804482	0.871075	0.941866	0.966721	0.961001	0.925316	0.990223	0.906542	0.888077	0.879732
2790	0.977411	0.952331	0.952233	0.96216	0.67349	0.877161	0.912139	0.959225	0.863755	0.882088	0.806723	0.868221	0.940847	0.96388	0.961001	0.934177	0.988128	0.911574	0.888281	0.879937
2795	0.97619	0.951491	0.950681	0.96216	0.664449	0.876739	0.894798	0.957187	0.853874	0.882839	0.802054	0.861085	0.939317	0.965097	0.958091	0.925949	0.988827	0.915169	0.885361	0.876812
2800	0.976801	0.951701	0.948784	0.961919	0.665131	0.875755	0.898266	0.954128	0.849194	0.882839	0.80112	0.857279	0.934217	0.964692	0.959837	0.927848	0.990223	0.908699	0.884487	0.875874
2805	0.979853	0.952541	0.952578	0.96216	0.66479	0.876739	0.890173	0.956167	0.863235	0.885468	0.803922	0.866794	0.936767	0.964286	0.962747	0.933544	0.99162	0.913731	0.886868	0.878454
2810	0.97558	0.952541	0.951888	0.961678	0.670761	0.877723	0.894798	0.956167	0.857514	0.882839	0.805976	0.863463	0.934217	0.966315	0.967404	0.927215	0.989525	0.911574	0.887072	0.878618
2815	0.977411	0.951491	0.949991	0.962883	0.666667	0.875896	0.905202	0.955148	0.851794	0.886219	0.801681	0.856327	0.938807	0.965097	0.958673	0.924051	0.989525	0.910855	0.885361	0.876824
2820	0.974359	0.951071	0.949819	0.96216	0.666155	0.874912	0.901734	0.961264	0.862194	0.88697	0.80056	0.867269	0.938297	0.966315	0.958091	0.932911	0.989525	0.902948	0.885826	0.877339
2825	0.980464	0.952541	0.949302	0.963124	0.667008	0.876458	0.89711	0.962283	0.860634	0.887345	0.802428	0.864891	0.935237	0.967532	0.958673	0.924684	0.990223	0.913731	0.886477	0.87803
2830	0.978632	0.951911	0.950164	0.961919	0.669396	0.87702	0.901734	0.959225	0.854394	0.887345	0.803175	0.865842	0.936257	0.966315	0.959255	0.926582	0.990223	0.913731	0.886663	0.878207
2835	0.974359	0.953171	0.950509	0.962883	0.670078	0.87941	0.889017	0.960245	0.855954	0.890725	0.803922	0.860609	0.937787	0.965909	0.961001	0.927215	0.990223	0.909418	0.887054	0.878615
2840	0.974969	0.951071	0.949991	0.963606	0.665302	0.879129	0.900578	0.956167	0.858554	0.881712	0.805602	0.860133	0.938297	0.965097	0.961001	0.926582	0.988827	0.918045	0.886384	0.877938
2845	0.976801	0.951701	0.952578	0.961919	0.658308	0.878566	0.90289	0.946993	0.854394	0.882839	0.802801	0.866794	0.938807	0.965909	0.963912	0.929114	0.990922	0.919482	0.885882	0.877432
2850	0.979853	0.951701	0.95344	0.963847	0.672467	0.876458	0.905202	0.960245	0.859074	0.885843	0.805042	0.864415	0.934727	0.966315	0.958091	0.934177	0.990922	0.902229	0.887593	0.879184
2855	0.974359	0.952331	0.950681	0.96216	0.660696	0.875334	0.898266	0.956167	0.856474	0.882839	0.803175	0.865366	0.938297	0.965097	0.955763	0.932911	0.990922	0.911574	0.885249	0.876742
2860	0.978632	0.952541	0.948094	0.963606	0.669055	0.871961	0.895954	0.95209	0.856474	0.880961	0.802988	0.857279	0.935747	0.965503	0.962747	0.929747	0.988827	0.910855	0.885138	0.876548
2865	0.976801	0.952331	0.951888	0.962642	0.668714	0.87435	0.898266	0.955148	0.855434	0.888472	0.803361	0.864415	0.937787	0.965097	0.960419	0.927848	0.990223	0.902948	0.886179	0.877674
2870	0.97619	0.952961	0.950854	0.96216	0.668373	0.872101	0.90289	0.961264	0.855434	0.885092	0.804108	0.868696	0.937277	0.966721	0.963329	0.932911	0.990223	0.909418	0.886458	0.877971
2875	0.977411	0.952331	0.951198	0.961436	0.672637	0.87702	0.904046	0.953109	0.852314	0.887345	0.805229	0.861085	0.938297	0.964692	0.958673	0.928481	0.988827	0.904385	0.886719	0.878265
2880	0.972527	0.952541	0.947405	0.961678	0.659843	0.876599	0.895954	0.954128	0.853874	0.885468	0.803175	0.866794	0.934217	0.961445	0.954598	0.931013	0.990922	0.902229	0.884263	0.875623
2885	0.97619	0.952541	0.952406	0.962401	0.665131	0.87702	0.901734	0.957187	0.858554	0.88697	0.805042	0.860133	0.935747	0.96388	0.963912	0.932911	0.990223	0.905823	0.886514	0.878067
2890	0.974969	0.951071	0.949474	0.962883	0.666837	0.872944	0.900578	0.956167	0.859594	0.888847	0.803735	0.868696	0.935237	0.964692	0.962165	0.926582	0.989525	0.913731	0.885975	0.877472
2895	0.973138	0.952121	0.95275	0.961436	0.67042	0.875615	0.904046	0.956167	0.847634	0.882088	0.802988	0.861085	0.937277	0.964692	0.962165	0.928481	0.990223	0.913012	0.886049	0.877545
2900	0.97558	0.952751	0.950681	0.963124	0.663596	0.874772	0.904046	0.955148	0.860634	0.883965	0.804108	0.862988	0.937787	0.964692	0.961001	0.935443	0.990223	0.913731	0.886161	0.877691
2905	0.974969	0.952541	0.951026	0.960954	0.668031	0.87168	0.904046	0.953109	0.856474	0.884716	0.805976	0.860609	0.934217	0.967127	0.960419	0.93038	0.990223	0.91445	0.885844	0.877311
2910	0.974969	0.951491	0.951543	0.961678	0.660355	0.87435	0.908671	0.953109	0.858554	0.881712	0.804295	0.86156	0.940337	0.965909	0.959837	0.932911	0.99162	0.904385	0.885249	0.876699
2915	0.977411	0.950861	0.951716	0.962401	0.65882	0.875896	0.90289	0.961264	0.856994	0.889974	0.805602	0.859657	0.934217	0.965097	0.961583	0.926582	0.989525	0.905104	0.885417	0.876898
2920	0.971306	0.950861	0.951026	0.96216	0.667008	0.871961	0.894798	0.956167	0.855434	0.88359	0.807283	0.869172	0.939827	0.965503	0.959255	0.928481	0.98743	0.906542	0.88564	0.8771
2925	0.974969	0.952331	0.948612	0.962401	0.663255	0.87168	0.89711	0.954128	0.854394	0.889598	0.801494	0.865842	0.941356	0.964692	0.957509	0.924051	0.989525	0.902948	0.884542	0.875932
2930	0.976801	0.952121	0.950509	0.961678	0.670078	0.869993	0.89711	0.963303	0.859074	0.888096	0.803361	0.862512	0.937277	0.965097	0.957509	0.923418	0.989525	0.911574	0.88564	0.877071
2935	0.976801	0.951701	0.951026	0.962401	0.669908	0.87168	0.90289	0.956167	0.859074	0.886594	0.800934	0.867269	0.935747	0.96388	0.963329	0.935443	0.988827	0.907261	0.886049	0.877562
2940	0.971306	0.952961	0.948957	0.962401	0.666155	0.875755	0.898266	0.95107	0.859074	0.883214	0.806723	0.866794	0.933707	0.964692	0.963329	0.931646	0.990922	0.907261	0.886031	0.877527
2945	0.978022	0.951911	0.951543	0.961678	0.668202	0.877723	0.89711	0.95209	0.860634	0.884716	0.806162	0.865366	0.941356	0.963068	0.961001	0.93038	0.988128	0.908699	0.886923	0.878487
2950	0.97558	0.952121	0.952578	0.962883	0.664108	0.876037	0.901734	0.955148	0.849194	0.886219	0.802241	0.864891	0.937277	0.96388	0.951106	0.93481	0.990223	0.910137	0.885584	0.877068
2955	0.974969	0.951911	0.953095	0.962401	0.662573	0.877864	0.894798	0.956167	0.857514	0.884341	0.80112	0.860609	0.935237	0.966721	0.956927	0.927848	0.990922	0.913012	0.885603	0.877089
2960	0.976801	0.951701	0.951198	0.962642	0.662914	0.877301	0.899422	0.958206	0.855954	0.885843	0.804295	0.863463	0.935747	0.965503	0.959837	0.925316	0.988827	0.91445	0.885938	0.877466
2965	0.971917	0.951911	0.950681	0.96216	0.663425	0.878707	0.909827	0.954128	0.855434	0.882463	0.803735	0.862512	0.936257	0.961851	0.961001	0.932278	0.990223	0.90151	0.885565	0.877064
2970	0.974359	0.951911	0.950164	0.960954	0.665643	0.874209	0.909827	0.950051	0.860114	0.878333	0.806536	0.862512	0.938807	0.96388	0.958673	0.927215	0.990223	0.910137	0.885491	0.876933
2975	0.97619	0.951911	0.950854	0.961195	0.665131	0.874631	0.893642	0.953109	0.848674	0.878708	0.806723	0.862988	0.937787	0.967532	0.961583	0.924684	0.988827	0.907261	0.885119	0.876533
2980	0.97619	0.952541	0.950336	0.962883	0.663255	0.87941	0.89711	0.959225	0.855954	0.885468	0.804482	0.862036	0.935747	0.962662	0.961583	0.929114	0.98743	0.904385	0.8859	0.877421
2985	0.978632	0.951281	0.950681	0.962642	0.665131	0.869712	0.904046	0.95209	0.850234	0.879459	0.803361	0.865366	0.937787	0.962256	0.960419	0.925949	0.990223	0.905104	0.884319	0.875676
2990	0.974359	0.951911	0.94775	0.961919	0.668543	0.874912	0.90289	0.950051	0.862715	0.885843	0.805042	0.864891	0.938807	0.965097	0.961001	0.93038	0.988128	0.902948	0.885993	0.877472
2995	0.97619	0.951491	0.950854	0.961919	0.669567	0.872242	0.900578	0.95209	0.857514	0.887721	0.801681	0.861085	0.935747	0.963068	0.957509	0.935443	0.990922	0.910855	0.88564	0.877087
3000	0.973748	0.952331	0.951543	0.961195	0.670249	0.878848	0.901734	0.956167	0.847114	0.885843	0.799253	0.863463	0.937277	0.965909	0.955763	0.925949	0.989525	0.902948	0.885696	0.877187
3005	0.974359	0.951281	0.950509	0.962883	0.661549	0.875755	0.906358	0.960245	0.855434	0.885843	0.802614	0.869172	0.938807	0.963068	0.963912	0.927215	0.990922	0.910137	0.885733	0.877255
3010	0.970696	0.951491	0.94775	0.960472	0.663255	0.871961	0.906358	0.957187	0.853874	0.887345	0.799253	0.86156	0.939317	0.96388	0.960419	0.924051	0.988827	0.909418	0.883947	0.875308
3015	0.97558	0.952751	0.948957	0.962642	0.668543	0.87702	0.901734	0.960245	0.853354	0.883214	0.800934	0.864415	0.935237	0.966721	0.962165	0.926582	0.990223	0.909418	0.885938	0.877443
3020	0.97619	0.950861	0.951716	0.960713	0.669567	0.878145	0.899422	0.956167	0.855954	0.879084	0.803175	0.865842	0.934217	0.964286	0.958673	0.924684	0.989525	0.904385	0.885789	0.877265
3025	0.980464	0.951911	0.953785	0.961678	0.67349	0.87435	0.908671	0.95209	0.854914	0.882463	0.805042	0.862988	0.936257	0.964692	0.962165	0.929747	0.990223	0.902948	0.886849	0.87837
3030	0.973138	0.951701	0.951716	0.961195	0.667861	0.87688	0.909827	0.958206	0.854914	0.884716	0.803922	0.869648	0.934727	0.961445	0.961001	0.929114	0.990922	0.905823	0.886291	0.877823
3035	0.974969	0.951071	0.948957	0.961436	0.669396	0.876318	0.901734	0.953109	0.859594	0.884716	0.802801	0.866794	0.940337	0.963068	0.964494	0.925316	0.988128	0.903666	0.885975	0.877487
3040	0.974359	0.951701	0.950509	0.961678	0.667178	0.872382	0.89711	0.954128	0.853354	0.883965	0.804855	0.866318	0.936257	0.966315	0.963329	0.927848	0.992318	0.909418	0.885603	0.87708
3045	0.974359	0.951701	0.950854	0.961678	0.667008	0.871117	0.901734	0.950051	0.846074	0.884341	0.801307	0.870599	0.935237	0.963474	0.962165	0.928481	0.990922	0.900791	0.88458	0.87598
3050	0.97558	0.951071	0.950854	0.96216	0.674514	0.875053	0.90289	0.966361	0.856474	0.88021	0.802241	0.865842	0.936767	0.963068	0.957509	0.927215	0.988827	0.907261	0.886291	0.877788
3055	0.974359	0.952751	0.950164	0.961436	0.664108	0.873788	0.901734	0.950051	0.852834	0.882463	0.803175	0.862512	0.932177	0.963474	0.959837	0.91962	0.990223	0.91445	0.884524	0.875918
3060	0.977411	0.951491	0.950164	0.963606	0.666837	0.872523	0.898266	0.955148	0.859594	0.883965	0.804482	0.866318	0.934727	0.964286	0.956927	0.929114	0.988827	0.911574	0.88564	0.877085
3065	0.97558	0.951491	0.951026	0.961436	0.668202	0.875474	0.895954	0.946993	0.856474	0.885468	0.800934	0.860133	0.935747	0.964692	0.958673	0.93481	0.990922	0.917326	0.885714	0.877209
3070	0.97619	0.951281	0.950164	0.961678	0.663084	0.876037	0.906358	0.95107	0.849194	0.88359	0.800934	0.866318	0.937787	0.963068	0.956927	0.925949	0.990922	0.905823	0.884673	0.876092
3075	0.97558	0.951281	0.951888	0.962401	0.663425	0.87941	0.894798	0.953109	0.851274	0.881712	0.803361	0.867269	0.934217	0.965097	0.959255	0.923418	0.990223	0.906542	0.885454	0.876951
3080	0.973748	0.953171	0.948612	0.96216	0.667861	0.874209	0.899422	0.954128	0.858034	0.881712	0.80112	0.86156	0.935747	0.964692	0.955763	0.921519	0.989525	0.905823	0.88471	0.876096
3085	0.973748	0.950861	0.950854	0.960954	0.662402	0.87702	0.89711	0.95209	0.857514	0.885843	0.802428	0.867269	0.933707	0.96388	0.965076	0.925316	0.989525	0.905823	0.885193	0.876669
3090	0.973748	0.952751	0.949474	0.962642	0.664278	0.876599	0.909827	0.957187	0.855434	0.887345	0.801307	0.868696	0.932687	0.966315	0.961583	0.927215	0.988128	0.910137	0.885826	0.877311
3095	0.977411	0.951491	0.951716	0.961195	0.660355	0.876458	0.901734	0.949032	0.851794	0.884716	0.79944	0.859657	0.938807	0.962662	0.961583	0.923418	0.989525	0.915169	0.884542	0.875984
3100	0.977411	0.952751	0.951543	0.961195	0.666837	0.875474	0.895954	0.950051	0.855954	0.885468	0.803922	0.863939	0.933707	0.970373	0.958091	0.931013	0.988827	0.916607	0.886235	0.877757
3105	0.974969	0.952121	0.952061	0.961919	0.66479	0.875193	0.900578	0.95107	0.852834	0.884341	0.802054	0.863939	0.934217	0.961851	0.962747	0.927215	0.989525	0.903666	0.885045	0.876502
3110	0.976801	0.952331	0.952923	0.962883	0.663425	0.872663	0.899422	0.965341	0.843994	0.881712	0.801681	0.860609	0.935237	0.965097	0.962165	0.915823	0.990223	0.905823	0.884338	0.875722
3115	0.978022	0.952541	0.953613	0.961678	0.665643	0.87688	0.905202	0.962283	0.845554	0.882088	0.803175	0.865366	0.938807	0.963068	0.962747	0.929114	0.992318	0.905104	0.886105	0.877614
3120	0.972527	0.951701	0.949646	0.962883	0.660867	0.875053	0.898266	0.957187	0.848154	0.882088	0.800373	0.859182	0.934217	0.963474	0.959255	0.927848	0.988827	0.900072	0.883612	0.874959
3125	0.97558	0.952751	0.951888	0.961678	0.659843	0.876599	0.901734	0.954128	0.853874	0.880961	0.802988	0.865842	0.935237	0.965909	0.958673	0.926582	0.990223	0.907261	0.885026	0.876488
3130	0.974969	0.950231	0.951026	0.961919	0.662231	0.877161	0.898266	0.956167	0.858554	0.882088	0.801867	0.864891	0.934727	0.963068	0.957509	0.93038	0.988827	0.915888	0.885212	0.876678
3135	0.976801	0.952961	0.952233	0.961678	0.661378	0.875193	0.89711	0.944954	0.857514	0.883214	0.803175	0.863463	0.935237	0.965909	0.959837	0.927215	0.990223	0.91445	0.885268	0.876734
3140	0.974969	0.951281	0.951543	0.962642	0.663084	0.873507	0.913295	0.954128	0.854394	0.885468	0.801867	0.864415	0.931668	0.964692	0.961583	0.925949	0.990922	0.90798	0.885045	0.876504
3145	0.97558	0.953171	0.949819	0.961919	0.665131	0.875896	0.90289	0.955148	0.855954	0.882839	0.803548	0.867269	0.937277	0.966315	0.960419	0.932278	0.990922	0.902948	0.885882	0.877377
3150	0.973138	0.951281	0.950681	0.962883	0.665643	0.877161	0.901734	0.959225	0.855434	0.879084	0.804108	0.865366	0.934217	0.963474	0.956927	0.931646	0.988827	0.906542	0.885528	0.876997
3155	0.974359	0.952541	0.948267	0.961436	0.667178	0.87941	0.893642	0.950051	0.850754	0.882463	0.801681	0.870124	0.934727	0.964692	0.957509	0.920253	0.990922	0.905823	0.885212	0.876652
3160	0.977411	0.952121	0.950164	0.962401	0.664961	0.872663	0.904046	0.946993	0.859074	0.88359	0.802801	0.864891	0.932687	0.963068	0.956927	0.922785	0.988827	0.910137	0.884747	0.87616
3165	0.977411	0.952961	0.949646	0.962401	0.663596	0.877864	0.899422	0.957187	0.851274	0.88359	0.802241	0.864415	0.932687	0.963068	0.960419	0.922152	0.988827	0.905823	0.885045	0.876499
3170	0.976801	0.951071	0.951371	0.961436	0.658308	0.878988	0.891329	0.955148	0.856474	0.882463	0.803922	0.867745	0.928098	0.966315	0.956345	0.932278	0.990922	0.902948	0.884933	0.876387
3175	0.973748	0.951701	0.950854	0.960472	0.666667	0.875896	0.900578	0.948012	0.852834	0.88697	0.803361	0.861085	0.936767	0.965909	0.962165	0.924051	0.990223	0.913012	0.885547	0.877033
3180	0.973748	0.952121	0.951543	0.961195	0.661037	0.876177	0.900578	0.954128	0.856474	0.879459	0.797012	0.864415	0.935237	0.96388	0.963912	0.922152	0.990223	0.908699	0.884245	0.875672
3185	0.976801	0.951701	0.949302	0.960954	0.665131	0.869993	0.904046	0.948012	0.857514	0.886219	0.802241	0.859657	0.933707	0.964286	0.959837	0.927215	0.989525	0.913731	0.884412	0.87579
3190	0.97619	0.951701	0.950854	0.960713	0.671102	0.871117	0.900578	0.959225	0.854394	0.885843	0.804482	0.867269	0.934727	0.962662	0.959255	0.928481	0.99162	0.905104	0.885696	0.87713
3195	0.973748	0.951071	0.950681	0.960231	0.66769	0.874209	0.907514	0.953109	0.849194	0.883214	0.799253	0.865842	0.936257	0.962256	0.962747	0.925316	0.98743	0.905104	0.884598	0.875984
3200	0.972527	0.951911	0.950854	0.961919	0.663255	0.878988	0.90289	0.954128	0.857514	0.882839	0.803735	0.862988	0.940337	0.963474	0.958091	0.925316	0.989525	0.90798	0.885677	0.877182
3205	0.974359	0.951701	0.948612	0.961678	0.663767	0.871961	0.893642	0.955148	0.849194	0.879835	0.802614	0.866318	0.933197	0.965503	0.962747	0.923418	0.990922	0.912293	0.884096	0.875452
3210	0.977411	0.952751	0.948957	0.961919	0.66189	0.876458	0.901734	0.957187	0.856474	0.879084	0.806162	0.865842	0.937787	0.961851	0.963912	0.922785	0.990223	0.910137	0.885398	0.876856
3215	0.97558	0.952121	0.950164	0.962642	0.668543	0.878145	0.900578	0.95209	0.852834	0.886219	0.799066	0.864891	0.937277	0.965097	0.958673	0.926582	0.992318	0.911574	0.885956	0.877482
3220	0.976801	0.952331	0.950681	0.960472	0.668373	0.871398	0.894798	0.950051	0.855434	0.880961	0.800747	0.862988	0.934727	0.963474	0.959255	0.923418	0.989525	0.902948	0.884245	0.875585
3225	0.972527	0.951701	0.946887	0.961195	0.663596	0.873507	0.893642	0.956167	0.853354	0.882088	0.803175	0.864891	0.936257	0.96388	0.961583	0.927215	0.990223	0.910137	0.884319	0.875703
3230	0.974969	0.951701	0.949302	0.963365	0.669737	0.874912	0.898266	0.955148	0.855434	0.886594	0.805976	0.86156	0.936767	0.965503	0.956927	0.929114	0.990223	0.902229	0.885975	0.87745
3235	0.974969	0.951911	0.949474	0.963124	0.666667	0.871117	0.901734	0.958206	0.860634	0.880586	0.800187	0.860133	0.932177	0.962662	0.957509	0.926582	0.989525	0.904385	0.884208	0.875567
3240	0.974969	0.951491	0.949819	0.961436	0.665984	0.872523	0.905202	0.954128	0.854394	0.880586	0.80112	0.862988	0.934727	0.964692	0.962165	0.928481	0.988827	0.909418	0.884654	0.876067
3245	0.97558	0.951701	0.951371	0.962642	0.662914	0.872804	0.906358	0.948012	0.852314	0.882088	0.803361	0.863463	0.932687	0.963068	0.965076	0.926582	0.990223	0.913731	0.88484	0.876267
3250	0.97558	0.951701	0.950681	0.962401	0.665814	0.86929	0.887861	0.948012	0.852834	0.885092	0.80056	0.864415	0.933707	0.961851	0.960419	0.923418	0.989525	0.904385	0.883705	0.875024
3255	0.973138	0.951281	0.949646	0.961195	0.657967	0.875755	0.910983	0.95209	0.854914	0.886594	0.799813	0.866794	0.938807	0.96388	0.962165	0.923418	0.992318	0.912293	0.884617	0.876088
3260	0.97619	0.951911	0.947922	0.96216	0.66172	0.877723	0.900578	0.95107	0.852834	0.88359	0.802054	0.862988	0.936767	0.965909	0.957509	0.921519	0.990223	0.90798	0.884635	0.876067
3265	0.974969	0.951071	0.948267	0.961919	0.662743	0.872663	0.90289	0.95107	0.855954	0.887721	0.803548	0.860609	0.939827	0.965909	0.958091	0.920886	0.988827	0.899353	0.884245	0.875604
3270	0.97619	0.951491	0.946887	0.961195	0.663596	0.873507	0.901734	0.948012	0.847634	0.883214	0.800747	0.865842	0.935237	0.961851	0.963329	0.934177	0.988827	0.900791	0.883891	0.875251
3275	0.974359	0.951281	0.951716	0.960954	0.659672	0.87955	0.892486	0.950051	0.863755	0.887345	0.804295	0.867745	0.935747	0.961445	0.960419	0.924051	0.99162	0.907261	0.88564	0.877174
3280	0.976801	0.951911	0.946887	0.961678	0.660525	0.874209	0.905202	0.944954	0.853354	0.883214	0.796265	0.865366	0.932687	0.967127	0.965076	0.921519	0.990223	0.905823	0.883482	0.874832
3285	0.972527	0.953171	0.949129	0.961678	0.661549	0.872804	0.899422	0.95107	0.855954	0.884341	0.802054	0.864891	0.938297	0.963068	0.965658	0.922785	0.990223	0.90798	0.884487	0.87589
3290	0.976801	0.950861	0.949819	0.961919	0.66462	0.876318	0.907514	0.953109	0.852314	0.875704	0.799813	0.867269	0.935747	0.965097	0.961001	0.927215	0.99162	0.907261	0.884784	0.876216
3295	0.974969	0.951281	0.951888	0.961436	0.661037	0.871398	0.901734	0.95209	0.858554	0.881712	0.803175	0.862512	0.933707	0.964286	0.958091	0.927848	0.990223	0.907261	0.884245	0.875628
3300	0.972527	0.951701	0.951716	0.961195	0.663767	0.870696	0.901734	0.956167	0.856474	0.880586	0.801494	0.865842	0.933197	0.963474	0.959837	0.921519	0.988827	0.904385	0.883984	0.87533
3305	0.973138	0.952121	0.951198	0.961919	0.659843	0.872804	0.90289	0.955148	0.851274	0.884716	0.801867	0.867269	0.933197	0.962662	0.959255	0.928481	0.992318	0.906542	0.884301	0.875707
3310	0.97619	0.951071	0.948439	0.962401	0.663596	0.874912	0.89711	0.95209	0.849194	0.884716	0.79944	0.867269	0.933707	0.961039	0.960419	0.921519	0.990223	0.909418	0.884059	0.875438
3315	0.970696	0.952121	0.949302	0.960954	0.661208	0.875334	0.889017	0.957187	0.854394	0.886219	0.804669	0.862036	0.939317	0.964692	0.961001	0.922785	0.990922	0.907261	0.884691	0.876107
3320	0.974359	0.951281	0.949302	0.961919	0.659672	0.877442	0.895954	0.948012	0.854914	0.882088	0.802054	0.862036	0.936767	0.96388	0.960419	0.922785	0.988128	0.909418	0.884245	0.87565
3325	0.974359	0.951701	0.950336	0.960231	0.65899	0.876739	0.905202	0.945973	0.845554	0.882088	0.802801	0.860609	0.937277	0.963474	0.962747	0.925316	0.990922	0.898634	0.883836	0.875195
3330	0.973138	0.952751	0.951198	0.961678	0.660014	0.872523	0.90289	0.954128	0.846074	0.880961	0.801307	0.869648	0.936257	0.96388	0.960419	0.918987	0.989525	0.905823	0.883798	0.875162
3335	0.97558	0.952751	0.949129	0.96216	0.665643	0.874631	0.898266	0.953109	0.856474	0.885092	0.797946	0.862512	0.933707	0.962256	0.960419	0.924684	0.992318	0.904385	0.884487	0.875913
3340	0.974359	0.951701	0.951198	0.961919	0.659672	0.870836	0.89711	0.953109	0.861674	0.882088	0.803361	0.865842	0.933197	0.965097	0.955763	0.927215	0.988827	0.910855	0.884208	0.875574
3345	0.97558	0.951491	0.949474	0.962642	0.667861	0.877161	0.893642	0.953109	0.858554	0.883214	0.80112	0.862512	0.939827	0.965909	0.958091	0.924051	0.989525	0.902229	0.885417	0.876895
3350	0.971917	0.951911	0.949474	0.961919	0.66479	0.873226	0.892486	0.949032	0.854914	0.882088	0.802241	0.860133	0.934727	0.961851	0.963329	0.925949	0.990922	0.899353	0.883984	0.875331
3355	0.974359	0.952541	0.949474	0.960231	0.663767	0.87702	0.89711	0.955148	0.856474	0.881337	0.801681	0.863939	0.932687	0.965503	0.958673	0.925316	0.988827	0.913012	0.884896	0.876345
3360	0.978632	0.952331	0.95275	0.961919	0.66172	0.874631	0.906358	0.949032	0.862194	0.88021	0.801867	0.865366	0.936257	0.964692	0.962165	0.925316	0.990223	0.903666	0.885212	0.876706
3365	0.971917	0.952331	0.948094	0.95999	0.666837	0.873928	0.908671	0.957187	0.862194	0.885468	0.79944	0.860609	0.934217	0.964692	0.962165	0.925949	0.989525	0.902948	0.884747	0.876153
3370	0.972527	0.951701	0.952061	0.962883	0.66462	0.875896	0.899422	0.95209	0.850754	0.880961	0.8	0.865366	0.932177	0.96388	0.959837	0.925316	0.990922	0.908699	0.884728	0.876164
3375	0.978632	0.952751	0.950509	0.963365	0.667349	0.876739	0.901734	0.963303	0.852834	0.883214	0.799627	0.867745	0.934727	0.964692	0.956345	0.925949	0.988827	0.912293	0.885844	0.877342
3380	0.97558	0.952331	0.949129	0.961919	0.659161	0.870836	0.875145	0.948012	0.851794	0.880961	0.798506	0.869648	0.935237	0.965909	0.958673	0.926582	0.990223	0.900072	0.882775	0.87405
