# Supplementary material for: Identifying Cell-Type Specific Genes and Expression Rules Based on Single-Cell Transcriptomic Atlas Data
Source: Front Bioeng Biotechnol. 2020 Apr 29;8:350. doi: 10.3389/fbioe.2020.00350 (PMC7201067; doi:10.3389/fbioe.2020.00350)
Supplement: Supplementary file 5 [file Table_5.XLSX]

## Sheet: Sheet1
Table S5. Performance of PART with different numbers of features ranked using mRMR.
Number of features	Bladder	Brain Microglia	Brain Neurons	Colon	Fat	Heart	Kidney	Liver	Lung	Mammary	Marrow	Muscle	Pancreas	Skin	Spleen	Thymus	Tongue	Trachea	Overall accuracy	MCC
5	0.473748	0.923142	0.494051	0.91275	0.079666	0.186788	0.343353	0.093782	0.026001	0.45475	0.034547	0.028069	0.063743	0.500406	0.014552	0.143671	0.735335	0.244428	0.344438	0.304204
10	0.540293	0.936371	0.369374	0.925042	0.132549	0.210682	0.321387	0.30581	0.179927	0.611716	0.257703	0.155566	0.187659	0.726461	0.447614	0.418354	0.765363	0.255212	0.425949	0.389705
15	0.551893	0.935741	0.290567	0.934683	0.17929	0.242727	0.330636	0.363914	0.234529	0.687946	0.369748	0.188392	0.590515	0.805601	0.476135	0.420253	0.831006	0.307692	0.469606	0.435838
20	0.615995	0.939521	0.413175	0.932996	0.229103	0.317498	0.315607	0.444444	0.291212	0.71273	0.382073	0.533302	0.567058	0.842127	0.470314	0.401266	0.86243	0.376707	0.52221	0.4894
25	0.60928	0.937211	0.423866	0.937816	0.238144	0.329726	0.298266	0.432212	0.303692	0.721742	0.433053	0.53901	0.581336	0.836851	0.46915	0.427215	0.849162	0.389648	0.532608	0.500042
30	0.638584	0.939101	0.44887	0.941914	0.266974	0.375404	0.356069	0.491335	0.321373	0.750282	0.493371	0.581827	0.627741	0.855519	0.480792	0.447468	0.851955	0.452912	0.562835	0.531321
35	0.666667	0.939521	0.44318	0.941914	0.274139	0.38721	0.353757	0.505607	0.349454	0.761547	0.505509	0.588487	0.643549	0.869724	0.48312	0.422785	0.871508	0.468009	0.570201	0.538996
40	0.679487	0.937841	0.464908	0.945288	0.28028	0.388475	0.34104	0.498471	0.336973	0.754412	0.510924	0.598953	0.6359	0.85836	0.481956	0.472152	0.865223	0.46729	0.574126	0.542924
45	0.687424	0.941621	0.508191	0.944083	0.302286	0.385383	0.386127	0.543323	0.352054	0.747278	0.541363	0.61941	0.679245	0.924919	0.488941	0.517722	0.963687	0.475198	0.595852	0.565993
50	0.704518	0.940151	0.532161	0.944565	0.337257	0.429515	0.417341	0.589195	0.434217	0.781449	0.574043	0.636537	0.705762	0.928977	0.505239	0.606329	0.969972	0.510424	0.623772	0.595524
55	0.716728	0.943931	0.549922	0.942878	0.338451	0.42572	0.369942	0.607543	0.426417	0.7638	0.589169	0.647479	0.698623	0.937094	0.534924	0.610759	0.97486	0.5133	0.627641	0.599592
60	0.715507	0.939311	0.554233	0.946011	0.352269	0.428672	0.36763	0.590214	0.438378	0.769808	0.602614	0.634634	0.709332	0.940341	0.529686	0.611392	0.973464	0.518332	0.631492	0.603665
65	0.713675	0.944561	0.5801	0.945529	0.361481	0.446943	0.406936	0.607543	0.446178	0.788209	0.607656	0.6451	0.712392	0.938718	0.545402	0.622785	0.979749	0.53271	0.642541	0.615439
70	0.729548	0.940571	0.603897	0.945047	0.364551	0.449473	0.411561	0.619776	0.457618	0.787082	0.610458	0.65176	0.709842	0.9375	0.540163	0.636709	0.97067	0.541337	0.647135	0.620468
75	0.737485	0.941621	0.609243	0.944565	0.374787	0.459171	0.419653	0.626911	0.472179	0.785956	0.634174	0.651284	0.720041	0.937094	0.530268	0.629114	0.972765	0.558591	0.653795	0.627386
80	0.834554	0.943091	0.612864	0.944565	0.447799	0.497962	0.402312	0.615698	0.472699	0.792339	0.653968	0.653187	0.717491	0.94237	0.574505	0.727848	0.978352	0.575845	0.677325	0.652708
85	0.837607	0.941831	0.614934	0.942878	0.467076	0.495151	0.417341	0.640163	0.476859	0.790837	0.65789	0.663178	0.72361	0.937094	0.572177	0.726582	0.976955	0.591661	0.680915	0.656517
90	0.822344	0.943301	0.610278	0.943119	0.472023	0.519747	0.43815	0.625892	0.552782	0.79985	0.674697	0.669363	0.73177	0.933847	0.583818	0.737975	0.973464	0.604601	0.690141	0.666103
95	0.849817	0.943511	0.629246	0.945288	0.48277	0.52045	0.441618	0.649337	0.572023	0.798348	0.67395	0.68411	0.720551	0.938718	0.5844	0.756329	0.971369	0.580877	0.695778	0.672325
100	0.838828	0.941831	0.631661	0.944083	0.472364	0.521715	0.461272	0.639144	0.554342	0.797597	0.664426	0.664605	0.73126	0.938312	0.593132	0.716456	0.971369	0.617541	0.692671	0.668812
105	0.84188	0.943091	0.644421	0.945288	0.469976	0.527758	0.468208	0.653415	0.564223	0.807736	0.676004	0.669838	0.738909	0.940341	0.590803	0.721519	0.976257	0.613947	0.697954	0.674532
110	0.843101	0.940781	0.630971	0.946011	0.474582	0.524807	0.495954	0.64526	0.560582	0.802854	0.678058	0.673644	0.736869	0.938312	0.576834	0.743038	0.97486	0.59885	0.696373	0.672822
115	0.836386	0.944981	0.648388	0.946252	0.4739	0.51792	0.49711	0.635066	0.559022	0.801352	0.701774	0.676499	0.739929	0.941153	0.579744	0.731646	0.969274	0.589504	0.699237	0.675841
120	0.843712	0.940991	0.652181	0.945288	0.479188	0.528461	0.478613	0.637105	0.573063	0.79985	0.70028	0.686013	0.754207	0.937094	0.580326	0.753165	0.976955	0.602444	0.70333	0.680261
125	0.845543	0.943091	0.655458	0.946975	0.484988	0.529585	0.487861	0.656473	0.571503	0.807736	0.693557	0.664605	0.756247	0.94237	0.576834	0.737342	0.978352	0.607477	0.704074	0.680995
130	0.848596	0.942041	0.67322	0.949385	0.484135	0.547294	0.504046	0.64526	0.592824	0.806234	0.709057	0.68078	0.763896	0.940747	0.593714	0.731646	0.976955	0.593817	0.711533	0.689014
135	0.849817	0.942251	0.669081	0.948662	0.481235	0.546311	0.522543	0.662589	0.595424	0.801727	0.715593	0.691246	0.771545	0.941964	0.593132	0.741772	0.97905	0.645579	0.714193	0.691956
140	0.85409	0.940151	0.681324	0.949144	0.490959	0.539845	0.495954	0.657492	0.590744	0.799474	0.716153	0.68411	0.771035	0.943182	0.561118	0.739873	0.977654	0.616104	0.712835	0.690321
145	0.846764	0.943301	0.676496	0.949144	0.476288	0.53858	0.498266	0.672783	0.584503	0.806609	0.713165	0.668411	0.776135	0.941153	0.588475	0.729747	0.978352	0.607477	0.710603	0.688077
150	0.85409	0.941621	0.682531	0.949144	0.494541	0.538159	0.494798	0.658512	0.602704	0.813744	0.708123	0.682683	0.767976	0.940341	0.597206	0.749367	0.976955	0.623293	0.7149	0.692605
155	0.854701	0.942251	0.694947	0.946252	0.493006	0.553197	0.522543	0.679918	0.618825	0.814119	0.709804	0.681256	0.771545	0.941964	0.575669	0.748734	0.978352	0.624012	0.71901	0.696963
160	0.843101	0.942041	0.703052	0.946975	0.501535	0.554041	0.500578	0.679918	0.624545	0.823507	0.709617	0.697431	0.775115	0.938718	0.597788	0.756329	0.981145	0.647735	0.72314	0.701478
165	0.840659	0.942251	0.704604	0.946975	0.483282	0.567955	0.549133	0.651376	0.642226	0.810364	0.714472	0.686965	0.772055	0.940341	0.594296	0.753797	0.978352	0.661395	0.723475	0.701784
170	0.849206	0.943931	0.691326	0.951314	0.494371	0.557554	0.517919	0.679918	0.652106	0.817499	0.711485	0.688392	0.781234	0.936282	0.582072	0.757595	0.979749	0.659238	0.722954	0.701363
175	0.844933	0.943931	0.712192	0.950832	0.506482	0.568517	0.521387	0.681957	0.637546	0.815621	0.728665	0.692674	0.774095	0.937094	0.582072	0.753165	0.977654	0.659238	0.728757	0.707467
180	0.854701	0.944561	0.703397	0.948421	0.516888	0.564441	0.537572	0.681957	0.643266	0.821254	0.727918	0.691246	0.775115	0.941153	0.600116	0.75	0.97905	0.653487	0.729781	0.708645
185	0.851038	0.944981	0.705984	0.947939	0.512112	0.565004	0.538728	0.675841	0.648466	0.811866	0.72549	0.682683	0.788883	0.940341	0.591967	0.758228	0.978352	0.6578	0.729092	0.70794
190	0.851648	0.943091	0.716158	0.948421	0.506994	0.559241	0.510983	0.692151	0.629225	0.817875	0.725117	0.691722	0.777155	0.937906	0.575669	0.767089	0.981844	0.653487	0.727716	0.706438
195	0.844322	0.942671	0.713054	0.947216	0.510406	0.570766	0.512139	0.664628	0.657826	0.813368	0.723623	0.69648	0.785314	0.9375	0.585565	0.772785	0.979749	0.640546	0.72965	0.708495
200	0.849206	0.942881	0.704777	0.946734	0.513477	0.579339	0.532948	0.692151	0.647426	0.814119	0.715219	0.691722	0.780724	0.943182	0.580908	0.76962	0.97905	0.646298	0.729818	0.708712
