# Supplementary material for: Identifying Cell-Type Specific Genes and Expression Rules Based on Single-Cell Transcriptomic Atlas Data
Source: Front Bioeng Biotechnol. 2020 Apr 29;8:350. doi: 10.3389/fbioe.2020.00350 (PMC7201067; doi:10.3389/fbioe.2020.00350)
Supplement: Supplementary file 8 [file Table_8.XLSX]

## Sheet: Sheet1
Table S8. Generated classification rules on the features ranked using MCFS.
Index	Condition	Result
Rule1	Phgr1 > 6 AND Coro1a <= 150 AND Krt15 <= 112 AND Kcnk16 <= 1 AND Mbp <= 390 AND Phgr1 > 11	Colon
Rule2	Dsc3 > 2 AND Pitx1 > 0 AND Tfap2b <= 1 AND Tspan8 <= 0 AND Dmkn > 45	Tongue
Rule3	P2ry12 > 358 AND Tmem119 > 11 AND Siglech > 7 AND Ptprcap <= 5 AND Cldn7 <= 1	Brain Microglia
Rule4	Capns2 > 3 AND Krt19 <= 348 AND Lgals7 > 1 AND Pax9 <= 2 AND Pitx1 <= 1 AND Ptprc <= 127 AND Fxyd3 > 5 AND Fosl1 <= 413 AND Krt8 <= 177 AND Krt13 <= 34	Skin
Rule5	Scgn > 12 AND Lgals4 <= 166 AND Abcc8 > 6 AND Ptprc <= 5	Pancreas
Rule6	Try4 > 10 AND Clps > 20	Pancreas
Rule7	Gc > 3 AND Resp18 <= 10 AND Tmem27 > 3 AND Scgn <= 5	Kidney
Rule8	Gc > 3 AND Chga <= 35 AND Cd8b1 <= 31 AND Tspan1 <= 0 AND Tmem119 <= 17 AND Myb <= 0 AND Gc > 11 AND Ptprcap <= 791 AND Tspan8 <= 0 AND Anxa8 <= 0 AND Cd8b1 <= 0 AND Aqp3 <= 0 AND Ctsd <= 4083 AND Tcf7 <= 75 AND Fcrls <= 0	Liver
Rule9	Krt14 > 266 AND Oit1 > 18 AND Pax9 <= 33 AND Dsg3 <= 78	Bladder
Rule10	Krt14 > 266 AND Pitx2 > 0 AND Foxf1a <= 93 AND Clca2 <= 20	Tongue
Rule11	Krt14 > 266 AND Krt13 <= 0 AND Laptm5 <= 172 AND Krt8 > 3 AND Calml3 <= 240 AND Krt17 > 0 AND Calm4 <= 0 AND Ckmt1 <= 7	Mammary
Rule12	Mobp > 11 AND Tspan8 <= 49 AND Ptprcap <= 87 AND Tmem119 <= 9 AND Laptm5 <= 9 AND Cldn3 <= 2 AND Chodl <= 0 AND Mbp > 118	Brain Neurons
Rule13	Tmem45b > 41 AND Aqp3 > 23 AND Krt19 > 9 AND Cldn3 <= 22 AND Fxyd3 > 52	Bladder
Rule14	Pitx1 > 1 AND Tspan1 <= 5 AND Fxyd3 <= 47 AND Ptprc <= 2 AND Foxf1a > 0 AND Calml3 <= 0 AND 2610528A11Rik <= 5 AND Cldn3 <= 0 AND C1qa <= 1	Bladder
Rule15	Ptprcap > 7 AND Ccr9 > 1 AND Tcf7 > 3 AND Perp <= 12 AND Siglech <= 12 AND Lpcat2 <= 5 AND Aqp3 <= 6 AND Clca2 <= 0 AND Guca2a <= 0 AND Gpr34 <= 14 AND Tcf7 > 437 AND Sfn <= 16 AND Cpa1 <= 0 AND 2210415F13Rik <= 0 AND Lpcat2 <= 0 AND Try4 <= 0 AND Krt19 <= 0 AND Ccr9 > 314 AND Mbp <= 1145 AND Dmbt1 <= 0 AND Cldn3 <= 0 AND Ins2 <= 6 AND Sfn <= 1 AND Cela2a <= 1 AND Cdh1 <= 0 AND Chga <= 0 AND Cela…	Thymus
Rule16	Serpinb5 > 8 AND Lgals4 > 105 AND Cela3b <= 9 AND Trp63 <= 6	Colon
Rule17	Serpinb5 > 8 AND Gpa33 > 1 AND Cdx1 <= 1 AND Dsc3 <= 4 AND Tfap2b <= 2	Bladder
Rule18	Serpinb5 > 8 AND Oit1 > 13 AND Cela3b <= 9 AND Fam25c <= 8 AND Ptprc <= 0 AND Tmem45b <= 0 AND Ckmt1 <= 1863	Trachea
Rule19	Serpinb5 > 8 AND Pax9 <= 0 AND Dsc3 <= 0 AND Cd3e <= 5 AND Capns2 <= 1 AND Ins2 <= 0 AND Tmem45b <= 5 AND Scel <= 1 AND Sfn > 8 AND Trp63 <= 98 AND Krt15 <= 4268 AND Lpcat2 <= 205 AND Ptprc <= 0 AND Gpa33 <= 0 AND Cx3cr1 <= 0 AND Ccr9 <= 0 AND Gpr34 <= 0 AND Asb5 <= 0 AND Dsp <= 154	Mammary
Rule20	Ptprcap > 7 AND Cd3e <= 0 AND Fxyd3 <= 7 AND Ttr > 4 AND Scgn <= 21 AND Myb <= 2 AND Tmem27 <= 0 AND Fosl1 <= 2 AND Resp18 <= 0 AND Ttr > 7	Liver
Rule21	Ptprcap > 7 AND Cd3e <= 0 AND Fxyd3 <= 7 AND Hexb > 2462 AND Cd79b <= 1016	Brain Microglia
Rule22	Ptprcap > 7 AND Cd3e <= 0 AND Fxyd3 <= 7 AND Myb > 0 AND Pigr <= 6 AND Cd3d <= 54 AND Cd3g <= 2 AND Cd8b1 <= 5 AND Ctsd <= 3073 AND Tcf7 <= 16 AND Gpr34 <= 19 AND Ccr9 <= 659 AND S100a14 <= 0 AND Krt8 <= 116 AND Lgmn <= 81 AND Ptprcap > 28 AND Ptprc <= 382 AND Epcam <= 43 AND Ctsd <= 1691 AND Gc <= 0 AND Cx3cr1 <= 17 AND Krt15 <= 2 AND Myb > 3 AND Try4 <= 1 AND Ctrl <= 1 AND Sfn <= 1 AND Tspan8 <…	Marrow
Rule23	Ptprcap > 7 AND Cd3e <= 0 AND Krt5 <= 102 AND Cldn3 > 6 AND P2ry12 <= 0 AND Lgals4 <= 8 AND Krt15 <= 0 AND Laptm5 > 96 AND Mbp <= 25	Trachea
Rule24	Ptprcap > 7 AND Cd3e <= 0 AND Fxyd3 <= 7 AND Myb > 0 AND Cd3d <= 54 AND Pigr > 6 AND 2210415F13Rik <= 0 AND Tmem119 <= 0 AND Myb <= 165	Spleen
Rule25	Ptprcap > 7 AND Cd3e <= 0 AND Fxyd3 <= 7 AND Myb > 0 AND Cd3d <= 54 AND Ctsd <= 3178 AND Cd3g <= 2 AND Cd8b1 <= 5 AND Tcf7 <= 16 AND Scgn > 0 AND Hpgds <= 49	Marrow
Rule26	Ptprcap > 7 AND Cd3e <= 0 AND Fxyd3 <= 7 AND Myb > 0 AND Cd3d <= 54 AND Ctsd <= 3178 AND Cd3g <= 2 AND Cd8b1 <= 5 AND Tcf7 <= 16 AND Gpr34 <= 20 AND Krt19 <= 4 AND Lgmn <= 278 AND Ccr9 <= 659 AND Cdh17 <= 3 AND Ptprcap > 28 AND Anxa8 <= 1 AND Pcsk1n > 0	Marrow
Rule27	Ptprcap > 7 AND Cd3e <= 0 AND Fxyd3 <= 7 AND Myb > 0 AND Cd3d <= 54 AND Ctsd <= 3178 AND Cd3g <= 2 AND Cd8b1 <= 5 AND Tcf7 <= 16 AND Gpr34 <= 20 AND Krt19 <= 4 AND Lgmn <= 278 AND Ccr9 <= 659 AND Ptprcap > 28 AND Cdh17 <= 3 AND Anxa8 <= 1 AND Epcam <= 156 AND Gc > 0 AND Ctsd > 0	Marrow
Rule28	Ptprcap > 7 AND Cd3e <= 0 AND Fxyd3 <= 7 AND Myb > 0 AND Cd3d <= 54 AND Ctsd <= 3178 AND Cd3g <= 2 AND Cd8b1 <= 5 AND Tcf7 <= 16 AND Gpr34 <= 20 AND Krt19 <= 4 AND Lgmn <= 278 AND Ccr9 <= 659 AND Ptprcap > 28 AND Cdh17 <= 3 AND Anxa8 <= 1 AND Epcam <= 156 AND Lgals4 <= 65 AND Capns2 <= 0 AND Calm4 <= 0 AND Resp18 <= 0 AND Prss2 <= 0 AND Ptprc <= 352 AND Lpcat2 <= 222 AND Ctrl <= 24 AND Krt6a <= 0…	Marrow
Rule29	Asb5 > 4 AND Cx3cr1 <= 48 AND Cd79b <= 56 AND Foxf1a <= 44 AND Abcc8 <= 0 AND Chga <= 5 AND Tmem119 <= 32 AND Dsp <= 9 AND Epcam <= 87 AND Perp <= 128 AND Dmbt1 <= 0 AND Guca2a <= 0 AND Klk1 <= 0 AND 2210415F13Rik <= 0 AND Cd8b1 <= 1 AND Chodl > 1 AND Sfn <= 26 AND Ptprc <= 14 AND Cela2a <= 0 AND Ptprcap <= 0 AND Hpgds <= 18 AND S100a14 <= 0 AND Trim29 <= 0 AND Asb5 > 522	Muscle
Rule30	Ptprcap > 3 AND Ccr9 > 1 AND Cd3e > 0 AND Perp <= 11 AND Siglech <= 34 AND Lpcat2 <= 5 AND Gpr34 <= 6 AND Krt19 <= 2 AND Tcf7 > 130 AND Aqp3 <= 20 AND Myb > 0 AND Fosl1 <= 0 AND Sfn <= 25 AND Mbp <= 129 AND Epcam <= 3 AND Tspan8 <= 0 AND Dmbt1 <= 1 AND Lgals7 <= 6 AND Guca2a <= 0 AND Cdh1 <= 0 AND Cldn3 <= 2 AND Myb <= 270 AND Myo1a <= 0 AND Coro1a <= 4874	Thymus
Rule31	Ptprcap > 7 AND Cd3e <= 1 AND Krt5 > 265 AND Krt19 <= 35 AND Cx3cr1 <= 3 AND Lpcat2 <= 1	Skin
Rule32	Ptprcap > 7 AND Cd3e <= 1 AND Myb > 0 AND Gc <= 2 AND Anxa8 <= 3 AND Cd3g <= 1 AND Ctsd <= 3196 AND Tcf7 <= 1 AND Cd8b1 <= 5 AND Gpr34 <= 20 AND Siglech > 5 AND Ttr <= 0 AND Mobp <= 0 AND C1qb <= 0	Marrow
Rule33	Ptprcap > 7 AND Cd3e <= 1 AND Fxyd3 <= 7 AND Myb > 0 AND Gc <= 2 AND Cd8a <= 1 AND Klk1 <= 275 AND Anxa8 <= 3 AND Tmem119 <= 400 AND Cd3e <= 0 AND Ctsd <= 3650 AND Tcf7 <= 60 AND Cd3g <= 2 AND Siglech <= 123 AND Clca2 <= 1 AND Gpr34 <= 88 AND Chodl <= 0 AND Cdh17 <= 3 AND Chga > 0 AND Scgn <= 0	Marrow
Rule34	Ptprcap > 7 AND Cd3e <= 1 AND Fxyd3 <= 7 AND Myb > 0 AND Cldn3 <= 8 AND Cd8a <= 1 AND Klk1 <= 275 AND Tmem119 <= 400 AND Cd3e <= 0 AND Chga <= 0 AND Chodl <= 0 AND Tcf7 <= 2 AND Siglech <= 663 AND C1qc <= 60 AND S100a14 > 0 AND Gpx2 <= 3	Marrow
Rule35	Ptprcap > 7 AND Cd3e <= 1 AND Fxyd3 <= 7 AND Myb > 0 AND Cldn3 <= 8 AND Cd8a <= 1 AND Klk1 <= 275 AND Tmem119 <= 400 AND Cd3e <= 0 AND Chodl <= 0 AND Chga <= 0 AND Tcf7 <= 1 AND Siglech <= 663 AND C1qc <= 60 AND Cdh17 <= 6 AND Clca2 <= 1 AND Lgmn <= 119 AND Lgals4 <= 88 AND Tcf7 <= 0 AND Krt6a > 0 AND Myb > 1	Marrow
Rule36	Ptprcap > 7 AND Cd3e <= 1 AND Fxyd3 <= 7 AND Myb > 0 AND Cldn3 <= 8 AND Cd8a <= 1 AND Klk1 <= 275 AND Tmem119 <= 436 AND Chodl <= 0 AND Cd3e <= 0 AND Chga <= 0 AND Tcf7 <= 1 AND Siglech <= 663 AND C1qc <= 60 AND Krt6a <= 0 AND Clca2 <= 1 AND Cdh17 <= 6 AND Lgmn <= 82 AND Tcf7 <= 0 AND Guca2a <= 2 AND Krt13 <= 0 AND Csf1r <= 51 AND Resp18 <= 0 AND Gpx2 <= 0 AND Tspan8 <= 1 AND Prss2 > 0	Marrow
Rule37	Ptprcap > 7 AND Cd3e <= 1 AND Fxyd3 <= 7 AND Myb > 0 AND Cldn3 <= 8 AND Cd8a <= 1 AND Chodl <= 0 AND Klk1 <= 275 AND Tmem119 <= 436 AND Cd3e <= 0 AND Chga <= 0 AND Ctsd <= 3698 AND Tcf7 <= 60 AND Siglech <= 123 AND Cd3g <= 2 AND Gc <= 0 AND C1qa <= 20 AND Ckmt1 <= 1 AND Krt6a <= 0 AND Cdh17 <= 2 AND Gpr34 <= 13 AND Sfn <= 1 AND Lgals4 <= 88 AND Krt13 <= 0 AND Resp18 <= 0 AND Trim29 <= 0 AND Capns…	Marrow
Rule38	Ptprcap > 7 AND Cd3e <= 1 AND Fxyd3 <= 6 AND Fcrls <= 6 AND Myb > 0 AND Cldn3 <= 9 AND Tmem119 <= 436 AND Cd8a <= 1 AND Klk1 <= 275 AND Chodl <= 0 AND Chga <= 0 AND Cd3e <= 0 AND Tcf7 <= 1 AND Siglech <= 2045 AND Krt6a <= 0 AND Clca2 <= 1 AND Cdh17 <= 6 AND Resp18 <= 0 AND Krt13 <= 0 AND Try4 <= 0 AND Tcf7 <= 0 AND Ptprc <= 8 AND Cd8b1 <= 0 AND Anxa8 <= 1 AND Pkp1 <= 0 AND Tspan8 <= 1 AND Clps <=…	Marrow
Rule39	Ptprcap > 7 AND Cd3e <= 1 AND Fxyd3 <= 6 AND Fcrls <= 6 AND Tspan8 > 1 AND Tfap2b <= 1 AND Resp18 <= 0 AND Lgals4 <= 3 AND Krt5 <= 0 AND Myb <= 3 AND Cd79b <= 3	Lung
Rule40	Ptprcap > 7 AND Cd3e <= 1 AND Fxyd3 <= 6 AND Fcrls <= 6 AND Myb > 0 AND Cldn3 > 36 AND Sfn <= 5	Liver
Rule41	Ptprcap > 7 AND Cd3e <= 1 AND Fxyd3 <= 6 AND Fcrls <= 6 AND Myb > 0 AND Tmem119 > 528 AND Hexb <= 80	Lung
Rule42	Ptprcap > 7 AND Cd3e <= 1 AND Fxyd3 <= 6 AND Fcrls <= 6 AND Myb > 0 AND Cd8a <= 1 AND Klk1 <= 275 AND Anxa8 <= 6 AND Chodl <= 0 AND Chga <= 0 AND Cd3e <= 0 AND Tcf7 <= 3 AND Siglech <= 2297 AND Gc <= 0 AND Trp63 <= 0 AND Ckmt1 <= 1 AND Krt6a <= 0 AND Cd3g <= 2 AND Tcf7 <= 0 AND Gpx2 <= 0 AND Resp18 <= 0 AND Krt13 <= 0 AND Slc2a5 <= 0 AND Trim29 <= 0 AND Cdh17 <= 2 AND Sfn <= 1 AND Ctrl <= 6 AND P…	Marrow
Rule43	Ptprcap > 7 AND Cd3e <= 1 AND Fxyd3 <= 6 AND Fcrls <= 6 AND Tmem119 <= 9 AND Cdh1 <= 2 AND Myb > 0 AND Cd8b1 > 699 AND Hexb <= 106	Thymus
Rule44	Ptprcap > 7 AND Cd3e <= 1 AND Fxyd3 <= 6 AND Fcrls <= 6 AND Tmem119 <= 9 AND Cdh1 <= 2 AND Myb > 0 AND Cd8a <= 1 AND Chodl <= 0 AND Gpr34 <= 14 AND Ctsd > 3587 AND Ctsd > 4095 AND Rac2 <= 3601	Marrow
Rule45	Ptprcap > 7 AND Cd3e <= 1 AND Fxyd3 <= 6 AND Fcrls <= 6 AND Tmem119 <= 9 AND Cdh1 <= 2 AND Myb > 0 AND Ctsd <= 3587 AND Cd8a <= 1 AND Chodl <= 0 AND Gpr34 <= 14 AND Siglech <= 9 AND Cd8b1 > 2 AND Epcam <= 3	Spleen
Rule46	Ptprcap > 7 AND Cd3e <= 1 AND Fxyd3 <= 6 AND Fcrls <= 6 AND Myb > 0 AND Ctsd <= 3650 AND Chodl <= 0 AND Siglech <= 69 AND Cd8a <= 1 AND Anxa8 <= 6 AND Chga <= 0 AND Cd3e <= 0 AND Cd3d <= 197 AND Tcf7 <= 4 AND Gc <= 0 AND Trp63 <= 0 AND Ckmt1 <= 1 AND Krt6a <= 0 AND Cd3g <= 2 AND Tcf7 <= 0 AND Resp18 <= 0 AND Cx3cr1 <= 25 AND Gpx2 <= 0 AND Slc2a5 <= 0 AND Trim29 <= 0 AND Cdh17 <= 2 AND Sfn <= 1 AN…	Marrow
Rule47	Ptprcap > 7 AND Cd3e <= 1 AND Fxyd3 <= 6 AND Fcrls <= 6 AND Myb > 0 AND Ctsd <= 3650 AND Chodl <= 0 AND Siglech <= 69 AND Cd8a <= 1 AND Cdh1 <= 3 AND Gpr34 <= 20 AND Cd3e <= 0 AND Cd3d <= 197 AND Chga <= 0 AND Tcf7 <= 4 AND Gc <= 0 AND Dsc3 <= 0 AND Krt6a <= 0 AND Clca2 <= 1 AND Cd3g <= 2 AND Tcf7 <= 0 AND Resp18 <= 0 AND Gpx2 <= 0 AND Slc2a5 <= 0 AND Trim29 <= 0 AND Try4 <= 0 AND Serpinb5 <= 0 A…	Marrow
Rule48	Ptprcap > 7 AND Cd3e <= 1 AND Fxyd3 <= 6 AND Fcrls <= 6 AND Cdh1 <= 2 AND Tmem119 <= 6 AND Myb > 0 AND Ctsd > 3587	Lung
Rule49	Ptprcap > 7 AND Cd3e <= 1 AND Fxyd3 <= 6 AND Fcrls <= 6 AND Cdh1 <= 2 AND Myb > 0 AND Cd8a <= 1 AND Chodl <= 0 AND Gpr34 <= 20 AND Siglech > 11 AND Epcam <= 0	Marrow
Rule50	Ptprcap > 7 AND Cd3e <= 1 AND Fxyd3 <= 6 AND Fcrls <= 6 AND Cdh1 <= 2 AND Tmem119 <= 6 AND Myb > 0 AND Siglech <= 8 AND Cd8a <= 1 AND Chodl <= 0 AND Chga <= 0 AND Cd3e <= 0 AND Gpr34 <= 1 AND Tcf7 <= 4 AND Gc <= 0 AND Tmem119 > 1 AND Hexb > 0	Marrow
Rule51	Ptprcap > 7 AND Cd3e <= 1 AND Fxyd3 <= 6 AND Fcrls <= 6 AND Cdh1 <= 2 AND Tmem119 <= 6 AND Myb > 0 AND Siglech <= 8 AND Cd8a <= 1 AND Chodl <= 0 AND Chga <= 0 AND Cd3e <= 0 AND Gpr34 <= 1 AND Tcf7 <= 4 AND Gc <= 0 AND Cx3cr1 <= 15 AND Ckmt1 <= 1 AND Resp18 <= 0 AND Slc2a5 <= 0 AND Gpx2 <= 0 AND Krt6a <= 0 AND Cd3g <= 2 AND Tcf7 <= 0 AND Pax9 <= 0 AND Trim29 <= 0 AND Ctrl <= 6 AND Sfn <= 1 AND Tme…	Marrow
Rule52	Ptprcap > 7 AND Cd3e <= 1 AND Fxyd3 <= 6 AND Fcrls <= 6 AND Cdh1 <= 2 AND Tmem119 <= 6 AND Pnlip <= 0 AND Fosl1 <= 2 AND Myb > 0 AND Siglech > 8 AND Cd79b <= 0	Lung
Rule53	Ptprcap > 7 AND Cd3e <= 1 AND Fxyd3 <= 6 AND Fcrls <= 6 AND Cdh1 <= 2 AND Tmem119 <= 6 AND Pnlip <= 0 AND Myb > 0 AND Cd8a <= 1 AND Chodl <= 0 AND Chga <= 0 AND Cd3e <= 0 AND Cd3d <= 274 AND Gc > 2 AND C1qb > 1	Marrow
Rule54	Ptprcap > 7 AND Cd3e <= 1 AND Fxyd3 <= 6 AND Fcrls <= 6 AND Cdh1 <= 2 AND Tmem119 <= 6 AND Pnlip <= 0 AND Myb > 0 AND Cd8a <= 1 AND Chga <= 0 AND Chodl <= 0 AND Cd3e <= 0 AND Cd3d <= 274 AND Trp63 <= 0 AND Tcf7 <= 4 AND Gc <= 0 AND Ckmt1 <= 1 AND Cx3cr1 <= 15 AND Gpr34 <= 11 AND Resp18 <= 0 AND Gpx2 <= 0 AND Krt6a <= 0 AND Slc2a5 <= 0 AND Trim29 <= 0 AND Capns2 <= 0 AND Ctrl <= 6 AND Sfn <= 1 AND…	Marrow
Rule55	Ptprcap > 7 AND Cd3e <= 1 AND Fxyd3 <= 6 AND Fcrls <= 6 AND Cdh1 <= 2 AND Tmem119 <= 6 AND Pnlip <= 0 AND Fosl1 <= 2 AND Cela2a <= 0 AND Myb > 0 AND Chga <= 0 AND Cd8b1 <= 3 AND Chodl <= 0 AND Tcf7 <= 60 AND Tmem119 <= 1 AND Cd8a <= 0 AND Trp63 <= 0 AND Gc <= 0 AND Cd3g <= 1 AND Ckmt1 <= 1 AND Gpr34 > 1 AND Coro1a > 1115	Spleen
Rule56	Ptprcap > 7 AND Cd3e <= 1 AND Fxyd3 <= 6 AND Fcrls <= 6 AND Cdh1 <= 2 AND Tmem119 <= 6 AND Pnlip <= 0 AND Fosl1 <= 2 AND Myb > 0 AND Chga <= 0 AND Chodl <= 0 AND Cd8b1 <= 3 AND Tcf7 <= 60 AND Tmem119 <= 1 AND Cd3g <= 1 AND Cd8a <= 0 AND Gc <= 0 AND Trp63 <= 0 AND Ckmt1 <= 1 AND Resp18 <= 0 AND Cx3cr1 <= 16 AND Cd8b1 <= 0 AND Gpx2 <= 0 AND Slc2a5 <= 0 AND Tcf7 <= 0 AND Trim29 <= 0 AND Krt6a <= 0 A…	Marrow
Rule57	Ptprcap > 7 AND Cd3e <= 1 AND Fxyd3 <= 6 AND Fcrls <= 6 AND Cdh1 <= 2 AND Tmem119 <= 6 AND Pnlip <= 0 AND Fosl1 <= 2 AND Cela2a <= 0 AND Cd79b > 266 AND Tcf7 <= 2 AND Myb > 0 AND Tmem119 <= 1 AND Gc <= 0 AND Dmkn <= 1 AND Clca2 <= 1 AND Gpr34 <= 0 AND Fxyd3 <= 0 AND Resp18 <= 0 AND Trim29 <= 0 AND Serpinb5 <= 0 AND P2ry12 <= 0 AND Ctrl <= 6 AND Cdx1 <= 0 AND Krt13 <= 0 AND Lypd3 <= 0 AND Myb > 18…	Marrow
Rule58	Ptprcap > 7 AND Cd3e <= 1 AND Fxyd3 <= 6 AND Fcrls <= 6 AND Cdh1 <= 2 AND Tmem119 <= 6 AND Pnlip <= 0 AND Fosl1 <= 2 AND Cela2a <= 0 AND Cd79b > 266 AND Tcf7 <= 2 AND Resp18 <= 0 AND Ins2 <= 4 AND Oit1 <= 1 AND Krt6a <= 0 AND Krt13 <= 0 AND Myb > 0 AND Ttr <= 0 AND Dmkn <= 1 AND Serpinb5 <= 0 AND Cdx1 <= 0 AND Tmem119 <= 1 AND Trim29 <= 0 AND Gpx2 <= 0 AND Ctrl <= 6 AND Clca2 <= 0 AND Coro1a <= 6…	Marrow
Rule59	Ptprcap > 7 AND Cd3e <= 1 AND Fxyd3 <= 6 AND Fcrls <= 6 AND Cdh1 <= 2 AND Tmem119 <= 6 AND Pnlip <= 0 AND Fosl1 <= 2 AND Cela2a <= 0 AND Cd79b > 266 AND Tcf7 <= 2 AND Resp18 <= 0 AND Ins2 <= 4 AND Oit1 <= 1 AND Krt6a <= 0 AND Krt13 <= 0 AND Chga <= 0 AND Trim29 <= 0 AND Myb > 0 AND Gc <= 2 AND Tmem119 <= 1 AND Gpx2 <= 0 AND Cdx1 <= 0 AND Ctrl <= 6 AND 1190003J15Rik <= 0 AND Calm4 <= 0 AND Serpinb…	Marrow
Rule60	Ptprcap > 7 AND Cd3e <= 1 AND Fxyd3 <= 6 AND Fcrls <= 6 AND Cdh1 <= 2 AND Tmem119 <= 6 AND Pnlip <= 0 AND Fosl1 <= 2 AND Cela2a <= 0 AND Cd79b > 266 AND Tcf7 <= 2 AND Resp18 <= 0 AND Ins2 <= 4 AND Oit1 <= 1 AND Krt6a <= 0 AND Krt13 <= 0 AND Chga <= 0 AND Trim29 <= 0 AND Gpx2 <= 0 AND Dmkn <= 0 AND Myb > 0 AND Gc <= 2 AND Tmem119 <= 1 AND Cdx1 <= 0 AND Clca2 <= 0 AND Ctrl <= 6 AND 1190003J15Rik <=…	Marrow
Rule61	Ptprcap > 7 AND Cd3e <= 1 AND Fxyd3 <= 6 AND Fcrls <= 6 AND Cdh1 <= 2 AND Tmem119 <= 6 AND Pnlip <= 0 AND Fosl1 <= 2 AND Cela2a <= 0 AND Cd79b > 266 AND Tcf7 <= 2 AND Resp18 <= 0 AND Ins2 <= 4 AND Oit1 <= 1 AND Krt6a <= 0 AND Krt13 <= 0 AND Chga <= 0 AND Trim29 <= 0 AND Gpx2 <= 0 AND Dmkn <= 0 AND Myb > 0 AND Gc <= 2 AND Tmem119 <= 1 AND Cdx1 <= 0 AND Clca2 <= 0 AND Ctrl <= 6 AND 1190003J15Rik <=…	Spleen
Rule62	Ptprcap > 7 AND Cd3e <= 1 AND Fxyd3 <= 6 AND Fcrls <= 6 AND Cdh1 <= 2 AND Tmem119 <= 6 AND Pnlip <= 0 AND Fosl1 <= 2 AND Cela2a <= 0 AND Cd79b > 266 AND Tcf7 <= 2 AND Resp18 <= 0 AND Krt6a <= 0 AND Tmem27 <= 0 AND Oit1 <= 1 AND Krt13 <= 0 AND Chga <= 0 AND Ins2 <= 4 AND Trim29 <= 0 AND Gpx2 <= 0 AND Dmkn <= 0 AND Sycn <= 0 AND Myb > 0 AND Gc <= 2 AND Tmem119 <= 1 AND Cdx1 <= 0 AND Ctrl <= 6 AND C…	Spleen
Rule63	Ptprcap > 7 AND Cd3e <= 1 AND Fxyd3 <= 6 AND Fcrls <= 6 AND Cdh1 <= 2 AND Tmem119 <= 6 AND Pnlip <= 0 AND Fosl1 <= 2 AND Cela2a <= 0 AND Cd79b > 266 AND Tcf7 <= 2 AND Resp18 <= 0 AND Ins2 <= 4 AND Oit1 <= 1 AND Krt6a <= 0 AND Krt13 <= 0 AND Myb > 0 AND Gc <= 2 AND Tmem119 <= 1 AND Dmkn <= 1 AND Cdx1 <= 0 AND Gpx2 <= 0 AND Trim29 <= 0 AND Krt15 <= 2 AND Sfn <= 228 AND Clca2 <= 0 AND Chodl <= 0 AND…	Marrow
Rule64	Ptprcap > 7 AND Cd3e <= 1 AND Fxyd3 <= 6 AND Fcrls <= 6 AND Cdh1 <= 2 AND Tmem119 <= 6 AND Pnlip <= 0 AND Fosl1 <= 2 AND Cela2a <= 0 AND Cd79b > 266 AND Tcf7 <= 2 AND Resp18 <= 0 AND Oit1 <= 1 AND Krt6a <= 0 AND Tmem27 <= 0 AND Krt13 <= 0 AND Myb > 0 AND Gc <= 2 AND Tmem119 <= 1 AND Dmkn <= 1 AND Cd3g <= 1 AND Cdx1 <= 0 AND Gpx2 <= 0 AND Trim29 <= 0 AND Clca2 <= 0 AND Chodl <= 0 AND Ctrl <= 6 AND…	Spleen
Rule65	Ptprcap > 7 AND Cd3e <= 1 AND Fxyd3 <= 6 AND Fcrls <= 6 AND Cdh1 <= 2 AND Tmem119 <= 6 AND Pnlip <= 0 AND Fosl1 <= 2 AND Cela2a <= 0 AND Cd79b > 266 AND Tcf7 <= 2 AND Resp18 <= 0 AND Ins2 <= 4 AND Oit1 <= 1 AND Krt6a <= 0 AND Krt13 <= 0 AND Myb > 0 AND Gc <= 2 AND Tmem119 <= 1 AND Dmkn <= 1 AND Cd3g <= 1 AND Crybb1 <= 14 AND Cdx1 <= 0 AND 2210415F13Rik <= 2 AND Gpx2 <= 0 AND Trim29 <= 0 AND Hpgds…	Spleen
Rule66	Ptprcap > 7 AND Cd3e <= 1 AND Fxyd3 <= 6 AND Fcrls <= 6 AND Cdh1 <= 2 AND Tmem119 <= 6 AND Pnlip <= 0 AND Fosl1 <= 2 AND Cela2a <= 0 AND Myb > 0 AND Chga <= 0 AND Pax9 <= 6 AND Chodl > 0 AND Ctsd > 1	Fat
Rule67	Ptprcap > 7 AND Cd3e <= 1 AND Fxyd3 <= 6 AND Fcrls <= 6 AND Cdh1 <= 2 AND Tmem119 <= 6 AND Pnlip <= 0 AND Fosl1 <= 2 AND Cela2a <= 0 AND Myb > 0 AND Chga <= 0 AND Pax9 <= 6 AND Pitx1 <= 0 AND Cd8b1 <= 3 AND Cd8a <= 1 AND Gpr34 <= 1 AND Tmem119 <= 1 AND Cd3e <= 0 AND Cd3d <= 232 AND Gc <= 1 AND Tcf7 > 4 AND Rac2 > 799	Marrow
Rule68	Ptprcap > 7 AND Cd3e <= 1 AND Fxyd3 <= 6 AND Fcrls <= 6 AND Cdh1 <= 2 AND Tmem119 <= 6 AND Pnlip <= 0 AND Fosl1 <= 2 AND Prss2 <= 0 AND Cela2a <= 0 AND Cd79b > 266 AND Tcf7 <= 2 AND Resp18 <= 0 AND Myb > 0 AND Fcrls <= 0 AND Gc <= 2 AND Tmem119 <= 1 AND Dmkn <= 1 AND Fxyd3 <= 0 AND Cd3g <= 1 AND Crybb1 <= 14 AND Cx3cr1 <= 0 AND Cdx1 > 0	Marrow
Rule69	Ptprcap > 7 AND Cd3e <= 1 AND Fxyd3 <= 6 AND Fcrls <= 6 AND Cdh1 <= 2 AND Tmem119 <= 6 AND Pnlip <= 0 AND Fosl1 <= 2 AND Cela2a <= 0 AND Cd79b > 266 AND Tcf7 <= 2 AND Resp18 <= 0 AND Ins2 <= 4 AND Oit1 <= 1 AND Krt6a <= 0 AND Myb > 0 AND Gc <= 2 AND Tmem119 <= 1 AND Dmkn <= 1 AND Cd3g <= 1 AND Crybb1 <= 14 AND 2210415F13Rik <= 2 AND Cx3cr1 <= 0 AND Gpx2 <= 0 AND Krt13 <= 0 AND Tmem45b <= 0 AND Cs…	Marrow
Rule70	Ptprcap > 7 AND Cd3e <= 1 AND Fxyd3 <= 6 AND Fcrls <= 6 AND Cdh1 <= 2 AND Tmem119 <= 6 AND Pnlip <= 0 AND Fosl1 <= 2 AND Cela2a <= 0 AND Cd79b > 266 AND Tcf7 <= 2 AND Resp18 <= 0 AND Tmem27 <= 0 AND Ins2 <= 4 AND Oit1 <= 1 AND Krt6a <= 0 AND Krt13 <= 0 AND Myb > 0 AND Gc <= 2 AND Krt15 <= 3 AND Tmem119 <= 1 AND Sfn <= 228 AND Dmkn <= 1 AND Cd3g <= 1 AND 2210415F13Rik <= 2 AND Gpx2 <= 0 AND Tmem45…	Marrow
Rule71	Ptprcap > 7 AND Cd3e <= 1 AND Fxyd3 <= 6 AND Fcrls <= 6 AND Cdh1 <= 2 AND Tmem119 <= 6 AND Pnlip <= 0 AND Fosl1 <= 2 AND Ctrb1 > 0 AND Cd3d <= 0 AND Tcf7 <= 0 AND Gpr34 <= 0 AND Epcam <= 76 AND Cela3b <= 0 AND Siglech <= 0 AND Ptprcap > 53	Marrow
Rule72	Ptprcap > 7 AND Cd3e <= 1 AND Fxyd3 <= 6 AND Fcrls <= 6 AND Cdh1 <= 2 AND Tmem119 <= 6 AND Pnlip <= 0 AND Cela2a <= 0 AND Fosl1 <= 2 AND Cd79b > 266 AND Tcf7 <= 2 AND Resp18 <= 0 AND Ins2 <= 4 AND Oit1 <= 1 AND Calm4 <= 0 AND Krt13 <= 0 AND Krt6a <= 0 AND Chga <= 0 AND Gpx2 > 0 AND Gpr34 <= 0 AND Serpinb5 <= 0 AND Myb <= 0 AND Cdh1 <= 0 AND Ins2 <= 0 AND Mbp <= 0 AND Krt15 > 0	Spleen
Rule73	Ptprcap > 7 AND Cd3e <= 1 AND Fxyd3 <= 6 AND Fcrls <= 6 AND Cdh1 <= 2 AND Tmem119 <= 6 AND Pnlip <= 0 AND Cela2a <= 0 AND Fosl1 <= 2 AND Cd79b > 266 AND Tcf7 <= 2 AND Resp18 <= 0 AND Ins2 <= 4 AND Oit1 <= 1 AND Krt6a <= 0 AND Krt13 <= 0 AND Gpx2 > 0 AND Perp <= 1 AND Gpr34 <= 0 AND Pkp1 <= 0 AND Krt15 > 0	Marrow
Rule74	Ptprcap > 7 AND Cd3e <= 1 AND Fxyd3 <= 6 AND Fcrls <= 6 AND Cdh1 <= 2 AND Tmem119 <= 6 AND Pnlip <= 0 AND Cela2a <= 0 AND Fosl1 <= 2 AND Cd79b > 266 AND Tcf7 <= 2 AND Resp18 <= 0 AND Ins2 <= 4 AND Oit1 <= 1 AND Krt6a <= 0 AND Krt13 <= 0 AND Chga <= 0 AND Gpx2 <= 0 AND Trim29 <= 0 AND Dmkn <= 0 AND Myb <= 0 AND Siglech <= 0 AND Cx3cr1 <= 1 AND Ckmt1 > 0 AND Epcam <= 16 AND Csf1r <= 0 AND S100a14 <…	Spleen
Rule75	Ptprcap > 7 AND Cd3e <= 1 AND Fxyd3 <= 6 AND Fcrls <= 6 AND Cdh1 <= 2 AND Tmem119 <= 6 AND Pnlip <= 0 AND Cela2a <= 0 AND Fosl1 <= 2 AND Cd79b > 270 AND Tcf7 <= 2 AND Resp18 <= 0 AND Ins2 <= 4 AND Oit1 <= 1 AND Krt6a <= 0 AND Krt13 <= 0 AND Chga <= 0 AND Gpx2 <= 0 AND Trim29 <= 0 AND Dmkn <= 0 AND Ckmt1 > 0 AND Epcam <= 16 AND Csf1r <= 0 AND S100a14 <= 0 AND 2610528A11Rik <= 0 AND P2ry12 <= 0 AND…	Marrow
Rule76	Ptprcap > 7 AND Cd3e <= 1 AND Fxyd3 <= 6 AND Fcrls <= 6 AND Cdh1 <= 2 AND Tmem119 <= 6 AND Pnlip <= 0 AND Cela2a <= 0 AND Fosl1 <= 2 AND Cd79b > 270 AND Tcf7 <= 2 AND Resp18 <= 0 AND Ins2 <= 4 AND Oit1 <= 1 AND Krt6a <= 0 AND Krt13 <= 0 AND Chga <= 0 AND Gpx2 <= 0 AND Trim29 <= 0 AND Dmkn <= 0 AND Myb <= 0 AND Siglech <= 0 AND Cx3cr1 <= 1 AND P2ry13 <= 0 AND Gc <= 0 AND C1qc <= 1 AND Ttr <= 0 AND…	Spleen
Rule77	Ptprcap > 7 AND Cd3e <= 1 AND Fxyd3 <= 6 AND Fcrls <= 6 AND Cdh1 <= 2 AND Tmem119 <= 6 AND Pnlip <= 0 AND Cela2a <= 0 AND Fosl1 <= 2 AND Cd79b > 270 AND Tcf7 <= 2 AND Resp18 <= 0 AND Ins2 <= 4 AND Oit1 <= 1 AND Krt6a <= 0 AND Krt13 <= 0 AND Chga <= 0 AND Gpx2 <= 0 AND Trim29 <= 0 AND Dmkn <= 0 AND Myb <= 0 AND Siglech <= 0 AND Cx3cr1 <= 1 AND P2ry13 <= 0 AND Gc <= 0 AND C1qc <= 1 AND Ttr <= 0 AND…	Marrow
Rule78	Ptprcap > 7 AND Cd3e <= 1 AND Fxyd3 <= 6 AND Fcrls <= 6 AND Cdh1 <= 2 AND Tmem119 <= 6 AND Pnlip <= 0 AND Cela2a <= 0 AND Fosl1 <= 2 AND Cd79b > 270 AND Tcf7 <= 2 AND Resp18 <= 0 AND Ins2 <= 4 AND Oit1 <= 1 AND Krt6a <= 0 AND Krt13 <= 0 AND Chga <= 0 AND Gpx2 <= 0 AND Trim29 <= 0 AND Dmkn <= 0 AND Myb <= 0 AND Siglech <= 0 AND Cx3cr1 <= 1 AND P2ry13 <= 0 AND Gc <= 0 AND C1qc <= 1 AND Ttr <= 0 AND…	Spleen
Rule79	Ptprcap > 7 AND Cd3e <= 1 AND Fxyd3 <= 6 AND Fcrls <= 6 AND Cdh1 <= 2 AND Tmem119 <= 6 AND Pnlip <= 0 AND Cela2a <= 0 AND Fosl1 <= 2 AND Cd79b > 270 AND Tcf7 <= 2 AND Tmem27 <= 0 AND Resp18 <= 0 AND Ins2 <= 4 AND Oit1 <= 1 AND Krt6a <= 0 AND Krt13 <= 0 AND Chga <= 0 AND Gpx2 <= 0 AND Trim29 <= 0 AND Dmkn <= 0 AND Myb <= 0 AND Siglech <= 0 AND Cx3cr1 <= 1 AND P2ry13 <= 0 AND Gc <= 0 AND C1qc <= 1 …	Spleen
Rule80	Ptprcap > 7 AND Cd3e <= 1 AND Fxyd3 <= 6 AND Fcrls <= 6 AND Cdh1 <= 2 AND Tmem119 <= 6 AND Pnlip <= 0 AND Cela2a <= 0 AND Fosl1 <= 2 AND Cd79b > 270 AND Tcf7 <= 2 AND Tmem27 <= 0 AND Resp18 <= 0 AND Ins2 <= 4 AND Oit1 <= 1 AND Krt6a <= 0 AND Krt13 <= 0 AND Chga <= 0 AND Gpx2 <= 0 AND Trim29 <= 0 AND Dmkn <= 0 AND Myb <= 0 AND Siglech <= 0 AND Cx3cr1 <= 1 AND P2ry13 <= 0 AND Gc <= 0 AND C1qc <= 1 …	Spleen
Rule81	Ptprcap > 7 AND Cd3e <= 1 AND Fxyd3 <= 6 AND Fcrls <= 6 AND Cdh1 <= 2 AND Tmem119 <= 6 AND Pnlip <= 0 AND Cela2a <= 0 AND Fosl1 <= 2 AND Cd79b > 270 AND Tcf7 <= 2 AND Tmem27 <= 0 AND Resp18 <= 0 AND Ins2 <= 4 AND Oit1 <= 1 AND Krt6a <= 0 AND Krt13 <= 0 AND Chga <= 0 AND Gpx2 <= 0 AND Trim29 <= 0 AND Ckmt1 > 0 AND Epcam <= 15 AND Clca2 <= 0 AND C1qc <= 0 AND Dmkn <= 1 AND Csf1r <= 0 AND Mobp <= 0 …	Marrow
Rule82	Ptprcap > 7 AND Cd3e <= 1 AND Fxyd3 <= 6 AND Fcrls <= 6 AND Cdh1 <= 2 AND Tmem119 <= 6 AND Pnlip <= 0 AND Cela2a <= 0 AND Fosl1 <= 2 AND Cd79b > 270 AND Tcf7 <= 2 AND Tmem27 <= 0 AND Resp18 <= 0 AND Ins2 <= 4 AND Oit1 <= 1 AND Krt6a <= 0 AND Krt13 <= 0 AND Chga <= 0 AND Gpx2 <= 0 AND Trim29 <= 0 AND Dmkn <= 0 AND Myb <= 0 AND Siglech <= 0 AND Cx3cr1 <= 1 AND P2ry13 <= 0 AND Gc <= 0 AND C1qc <= 1 …	Spleen
Rule83	Ptprcap > 7 AND Cd3e <= 1 AND Fxyd3 <= 6 AND Fcrls <= 6 AND Cdh1 <= 2 AND Tmem119 <= 6 AND Pnlip <= 0 AND Cela2a <= 0 AND Fosl1 <= 2 AND Cd79b > 270 AND Tcf7 <= 2 AND Tmem27 <= 0 AND Resp18 <= 0 AND Ins2 <= 4 AND Oit1 <= 1 AND Krt6a <= 0 AND Krt13 <= 0 AND Chga <= 0 AND Gpx2 <= 0 AND Trim29 <= 0 AND Dmkn <= 0 AND Myb <= 0 AND Siglech <= 0 AND Cx3cr1 <= 1 AND P2ry13 <= 0 AND Gc <= 0 AND C1qc <= 1 …	Spleen
Rule84	Ptprcap > 7 AND Cd3e <= 1 AND Fxyd3 <= 6 AND Fcrls <= 6 AND Cdh1 <= 2 AND Tmem119 <= 6 AND Pnlip <= 0 AND Cela2a <= 0 AND Fosl1 <= 2 AND Cd79b > 270 AND Tcf7 <= 2 AND Tmem27 <= 0 AND Resp18 <= 0 AND Ins2 <= 4 AND Oit1 <= 1 AND Krt6a <= 0 AND Krt13 <= 0 AND Chga <= 0 AND Gpx2 <= 0 AND Trim29 <= 0 AND Dmkn <= 0 AND Myb <= 0 AND Siglech <= 0 AND Cx3cr1 <= 1 AND P2ry13 <= 0 AND Gc <= 0 AND C1qc <= 1 …	Spleen
Rule85	Tmem27 > 2 AND Chga <= 13 AND Myb <= 0 AND Lpcat2 <= 1 AND Fxyd3 <= 0 AND Gpr34 <= 5 AND Tmem119 <= 307 AND Rac2 <= 23	Kidney
Rule86	Ptprcap > 7 AND Cd3e <= 1 AND Fxyd3 <= 6 AND Fcrls <= 6 AND Cdh1 <= 2 AND Tmem119 <= 6 AND Pnlip <= 0 AND Cela2a <= 0 AND Fosl1 <= 2 AND Cd79b > 270 AND Tcf7 <= 2 AND Resp18 <= 0 AND Oit1 <= 1 AND Krt6a <= 0 AND Krt13 <= 0 AND Chga <= 0 AND Ins2 <= 4 AND Gpx2 <= 0 AND Trim29 <= 0 AND Dmkn <= 0 AND Myb <= 0 AND Siglech <= 0 AND Cx3cr1 <= 1 AND P2ry13 <= 0 AND Gc <= 0 AND C1qc <= 1 AND Ttr <= 0 AND…	Spleen
Rule87	Ptprcap > 7 AND Cd3e <= 1 AND Fxyd3 <= 6 AND Fcrls <= 6 AND Cdh1 <= 2 AND Tmem119 <= 6 AND Pnlip <= 0 AND Cela2a <= 0 AND Fosl1 <= 2 AND Cd79b > 270 AND Tcf7 <= 2 AND Resp18 <= 0 AND Oit1 <= 1 AND Krt6a <= 0 AND Krt13 <= 0 AND Chga <= 0 AND Ins2 <= 4 AND Gpx2 <= 0 AND Trim29 <= 0 AND Dmkn <= 0 AND Myb <= 0 AND Siglech <= 0 AND Cx3cr1 <= 1 AND P2ry13 <= 0 AND Gc <= 0 AND C1qc <= 1 AND Ttr <= 0 AND…	Spleen
Rule88	Ptprcap > 7 AND Cd3e <= 1 AND Fxyd3 <= 6 AND Fcrls <= 6 AND Tmem119 <= 9 AND Cdh1 <= 2 AND Pnlip <= 0 AND Cela2a <= 0 AND Cd79b > 270 AND Tcf7 <= 2 AND Resp18 <= 0 AND Ins2 <= 4 AND Calm4 <= 0 AND Oit1 <= 1 AND Krt13 <= 0 AND Krt6a <= 0 AND Chga <= 0 AND Gpx2 > 0 AND Gpr34 <= 0 AND Dmkn <= 0 AND Serpinb5 <= 0 AND Lypd3 <= 0 AND Lgals7 <= 0 AND C1qa <= 0 AND Tmem45b <= 0 AND C1qb <= 0 AND Mbp <= 0…	Spleen
Rule89	Ptprcap > 7 AND Cd3e <= 1 AND Fxyd3 <= 6 AND Fcrls <= 6 AND Tmem119 <= 9 AND Cdh1 <= 2 AND Pnlip <= 0 AND Cela2a <= 0 AND Cd79b > 270 AND Tcf7 <= 2 AND Resp18 <= 0 AND Ins2 <= 4 AND Calm4 <= 0 AND Gpx2 <= 0 AND Krt6a <= 0 AND Krt13 <= 0 AND Chga <= 0 AND Myb <= 0 AND Dmkn <= 0 AND Trim29 <= 0 AND Siglech <= 0 AND Cx3cr1 <= 1 AND Gc <= 0 AND C1qc <= 1 AND Ttr <= 0 AND P2ry13 <= 0 AND Ccr9 <= 0 AND…	Spleen
Rule90	Ptprcap > 7 AND Cd3e <= 1 AND Fxyd3 <= 6 AND Fcrls <= 6 AND Tmem119 <= 9 AND Cdh1 <= 2 AND Pnlip <= 0 AND Cela2a <= 0 AND Cd79b > 270 AND Tcf7 <= 2 AND Resp18 <= 0 AND Ins2 <= 4 AND Gpx2 <= 0 AND Krt6a <= 0 AND Krt13 <= 0 AND Chga <= 0 AND Myb <= 0 AND Dmkn <= 0 AND Epcam <= 42 AND Trim29 <= 0 AND Gc <= 0 AND P2ry13 <= 0 AND Cd8b1 <= 0 AND Siglech <= 0 AND C1qc <= 1 AND Ttr <= 0 AND Fcrls <= 0 AN…	Marrow
Rule91	Ptprcap > 7 AND Cd3e <= 1 AND Fxyd3 <= 6 AND Fcrls <= 6 AND Tmem119 <= 9 AND Cdh1 <= 2 AND Pnlip <= 0 AND Cela2a <= 0 AND Cd79b > 270 AND Tcf7 <= 2 AND Resp18 <= 0 AND Ins2 <= 4 AND Calm4 <= 0 AND Gpx2 <= 0 AND Krt6a <= 0 AND Krt13 <= 0 AND Chga <= 0 AND Myb <= 0 AND Dmkn <= 0 AND Epcam <= 42 AND Trim29 <= 0 AND Gc <= 0 AND Siglech <= 0 AND P2ry13 <= 0 AND C1qc <= 1 AND Cd8a <= 0 AND Fcrls <= 0 A…	Spleen
Rule92	Ptprcap > 7 AND Cd3e <= 1 AND Fxyd3 <= 6 AND Fcrls <= 6 AND Tmem119 <= 9 AND Cdh1 <= 2 AND Pnlip <= 0 AND Cela2a <= 0 AND Cd79b > 270 AND Tcf7 <= 2 AND Resp18 <= 0 AND Ins2 <= 4 AND Calm4 <= 0 AND Gpx2 <= 0 AND Krt6a <= 0 AND Krt13 <= 0 AND Chga <= 0 AND Myb <= 0 AND Dmkn <= 0 AND Epcam <= 42 AND Trim29 <= 0 AND Gc <= 0 AND Siglech <= 0 AND P2ry13 <= 0 AND C1qc <= 0 AND Fcrls <= 0 AND Cd8a <= 0 A…	Spleen
Rule93	Ptprcap > 7 AND Cd3e <= 1 AND Fxyd3 > 6 AND Cx3cr1 <= 3 AND Tfap2c <= 0 AND Krt17 <= 2	Trachea
Rule94	Ptprcap > 7 AND Cd3e <= 1 AND Dsp <= 6 AND Fcrls <= 6 AND Tmem119 <= 9 AND Cdh1 > 2 AND Tfap2b <= 1 AND B4galnt2 <= 4 AND Lgals7 <= 0 AND Lpcat2 > 44 AND Krt5 <= 0 AND 2210010C04Rik <= 41	Trachea
Rule95	Ptprcap > 7 AND Cd3e <= 1 AND Dsp <= 6 AND Fcrls <= 6 AND Tmem119 <= 9 AND Pnlip <= 0 AND Cdh1 > 2 AND Tfap2b > 1	Kidney
Rule96	Ptprcap > 7 AND Cd3e <= 1 AND Dsp <= 6 AND Fcrls <= 6 AND Tmem119 <= 9 AND Pnlip <= 0 AND Cdh1 > 2 AND B4galnt2 <= 4 AND Lgals7 <= 0 AND Cd3g > 13 AND Krt8 <= 12	Trachea
Rule97	Ptprcap > 7 AND Cd3e <= 1 AND Dsp <= 6 AND Fcrls <= 6 AND Tmem119 <= 9 AND Cdh1 > 2 AND B4galnt2 <= 4 AND Lgals7 <= 0 AND Slc2a5 <= 0 AND Krt19 <= 50 AND Cx3cr1 <= 1 AND Ins2 <= 4 AND Aqp3 <= 0 AND Myb <= 40	Marrow
Rule98	Ptprcap > 7 AND Ccr9 > 1 AND Siglech <= 176 AND Pigr > 1 AND Mbp <= 0	Spleen
Rule99	Ptprcap > 7 AND Ccr9 > 1 AND Siglech <= 176 AND Fosl1 <= 1 AND Tcf7 > 0 AND Perp <= 8 AND Clca2 <= 0 AND Lpcat2 <= 5 AND Myb > 206 AND Epcam <= 7 AND Mbp <= 1375 AND Gpr34 <= 6 AND Rnase1 <= 0 AND Cd3d > 396	Thymus
Rule100	Ptprcap > 7 AND Cd3e <= 1 AND Dsp <= 6 AND Fcrls <= 6 AND Tmem119 <= 9 AND Pnlip <= 0 AND Fosl1 <= 2 AND Prss2 <= 0 AND Cela2a <= 0 AND Cd79b > 270 AND Tcf7 <= 2 AND Resp18 <= 0 AND Ins2 <= 4 AND Oit1 <= 1 AND Krt6a <= 0 AND Krt13 <= 0 AND Gpx2 > 0 AND Dmkn <= 0 AND Siglech <= 0 AND Pigr <= 12 AND Aqp3 <= 0 AND C1qb <= 0 AND Dmbt1 <= 2 AND Perp <= 0	Marrow
Rule101	Ptprcap > 7 AND Cd3e <= 1 AND Dsp <= 6 AND Fcrls <= 6 AND Tmem119 <= 9 AND Pnlip <= 0 AND Fosl1 <= 2 AND Gpx2 <= 1 AND Prss2 <= 0 AND Cela2a <= 0 AND Cd79b > 270 AND Tcf7 <= 2 AND Resp18 <= 0 AND Ins2 <= 4 AND Krt6a <= 0 AND Krt13 <= 0 AND Chga <= 0 AND Myb > 11 AND Cdh1 <= 6 AND Csf1r <= 8 AND Hpgds <= 104 AND Prss32 <= 0 AND Crybb1 <= 14 AND P2ry13 <= 0 AND Trem2 <= 0 AND Guca2a <= 0 AND Lgals4…	Marrow
Rule102	Ptprcap > 7 AND Cd3e <= 1 AND Dsp <= 6 AND Fcrls <= 6 AND Tmem119 <= 9 AND Pnlip <= 0 AND Fosl1 <= 2 AND Gpx2 <= 1 AND Prss2 <= 0 AND Cela2a <= 0 AND Cd79b > 270 AND Tcf7 <= 2 AND Resp18 <= 0 AND Ins2 <= 4 AND Krt6a <= 0 AND Krt13 <= 0 AND Chga <= 0 AND Epcam <= 42 AND Ccr9 <= 2 AND Gc <= 0 AND Asb5 > 0 AND Cx3cr1 <= 2 AND Cd79b > 623 AND C1qc <= 0	Spleen
Rule103	Ptprcap > 7 AND Cd3e <= 1 AND Dsp <= 6 AND Fcrls <= 6 AND Tmem119 <= 9 AND Pnlip <= 0 AND Fosl1 <= 2 AND Gpx2 <= 1 AND Prss2 <= 0 AND Cela2a <= 0 AND Cd79b > 270 AND Tcf7 <= 2 AND Resp18 <= 0 AND Ins2 <= 4 AND Krt6a <= 0 AND Krt13 <= 0 AND Chga <= 0 AND Epcam <= 42 AND Ccr9 <= 2 AND Gc <= 0 AND Dmkn <= 0 AND P2ry13 <= 0 AND C1qc <= 0 AND Siglech <= 0 AND Fcrls <= 0 AND Ttr <= 0 AND C1qb <= 0 AND …	Spleen
Rule104	Ptprcap > 7 AND Cd3e <= 1 AND Dsp <= 6 AND Fcrls <= 6 AND Tmem119 <= 9 AND Pnlip <= 0 AND Fosl1 <= 2 AND Gpx2 <= 1 AND Prss2 <= 0 AND Cela2a <= 0 AND Cd79b > 270 AND Tcf7 <= 2 AND Resp18 <= 0 AND Ins2 <= 4 AND Krt6a <= 0 AND Krt13 <= 0 AND Chga <= 0 AND Epcam <= 42 AND Ccr9 <= 2 AND Gc <= 0 AND Dmkn <= 0 AND P2ry13 <= 0 AND C1qc <= 0 AND Siglech <= 0 AND Fcrls <= 0 AND Ttr <= 0 AND C1qb <= 0 AND …	Marrow
Rule105	Ptprcap > 7 AND Cd3e <= 1 AND Dsp <= 6 AND Fcrls <= 6 AND Tmem119 <= 9 AND Pnlip <= 0 AND Fosl1 <= 2 AND Gpx2 <= 1 AND Prss2 <= 0 AND Cela2a <= 0 AND Cd79b > 270 AND Tcf7 <= 2 AND Resp18 <= 0 AND Ins2 <= 4 AND Krt6a <= 0 AND Krt13 <= 0 AND Chga <= 0 AND Epcam <= 42 AND Ccr9 <= 2 AND Cd8b1 <= 0 AND Gc > 0 AND Chodl <= 0 AND Coro1a <= 1913 AND Ptprc <= 1928 AND Ttr <= 5 AND Cx3cr1 <= 21 AND Coro1a …	Spleen
Rule106	Ptprcap > 7 AND Cd3e <= 1 AND Dsp <= 6 AND Fcrls <= 6 AND Tmem119 <= 9 AND Pnlip <= 0 AND Fosl1 <= 2 AND Gpx2 <= 1 AND Prss2 <= 0 AND Cela2a <= 0 AND Cd79b > 270 AND Tcf7 <= 2 AND Gc <= 0 AND Resp18 <= 0 AND Krt13 <= 0 AND Krt6a <= 0 AND Chga <= 0 AND Epcam <= 40 AND Dmkn <= 0 AND Siglech <= 0 AND C1qc <= 1 AND Trim29 <= 0 AND P2ry13 <= 0 AND Cd8a <= 0 AND Ins2 <= 0 AND Fcrls <= 0 AND Ttr <= 0 AN…	Spleen
Rule107	Ptprcap > 7 AND Cd3e <= 1 AND Dsp <= 6 AND Fcrls <= 6 AND Tmem119 <= 9 AND Pnlip <= 0 AND Fosl1 <= 2 AND Gpx2 <= 1 AND Prss2 <= 0 AND Cela2a <= 0 AND Cd79b > 270 AND Tcf7 <= 2 AND Gc <= 0 AND Resp18 <= 0 AND Krt13 <= 0 AND Krt6a <= 0 AND Chga <= 0 AND Epcam <= 40 AND Dmkn <= 0 AND Siglech <= 0 AND C1qc <= 1 AND Trim29 <= 0 AND P2ry13 <= 0 AND Cd8a <= 0 AND Ins2 <= 0 AND Fcrls <= 0 AND Ttr <= 0 AN…	Spleen
Rule108	Ptprcap > 7 AND Cd3e <= 1 AND Dsp <= 6 AND Fcrls <= 6 AND Tmem119 <= 9 AND Pnlip <= 0 AND Fosl1 <= 2 AND Gpx2 <= 1 AND Prss2 <= 0 AND Cela2a <= 0 AND Cd79b > 270 AND Tcf7 <= 2 AND Gc <= 0 AND Resp18 <= 0 AND Krt13 <= 0 AND Krt6a <= 0 AND Chga <= 0 AND Epcam <= 40 AND Ins2 <= 6 AND Ccr9 <= 2 AND Dmkn <= 0 AND P2ry13 <= 0 AND C1qc <= 0 AND Siglech <= 0 AND Fcrls <= 0 AND Ttr <= 0 AND C1qb <= 0 AND …	Spleen
Rule109	Ptprcap > 7 AND Cd3e <= 1 AND Dsp <= 6 AND Fcrls <= 6 AND Tmem119 <= 9 AND Cldn3 > 3 AND P2ry12 <= 0 AND Ptprcap <= 106	Lung
Rule110	Ptprcap > 7 AND Cd3e <= 1 AND Dsp <= 6 AND Fcrls <= 6 AND Tmem119 <= 9 AND Pnlip <= 0 AND Fosl1 <= 2 AND Prss2 <= 0 AND Gpx2 <= 1 AND Cela2a <= 0 AND Ccr9 <= 20 AND Cd79b > 270 AND Tcf7 <= 2 AND Gc <= 0 AND Resp18 <= 0 AND Krt13 <= 0 AND Krt6a <= 0 AND Chga <= 0 AND Epcam <= 23 AND Dmkn <= 0 AND P2ry13 <= 0 AND Cd8a <= 0 AND Ccr9 > 2 AND Oit1 <= 0 AND Ctsd <= 279	Spleen
Rule111	Ptprcap > 7 AND Ccr9 > 1 AND Siglech <= 199 AND Fosl1 <= 2 AND Tcf7 > 0 AND Perp <= 8 AND Clca2 <= 0 AND Aqp3 <= 20 AND Cd79b <= 570 AND Myb <= 1 AND Prss2 <= 1 AND Guca2a <= 0 AND Dmbt1 > 1 AND Coro1a > 704	Spleen
Rule112	Ptprcap > 7 AND Ccr9 > 1 AND Siglech <= 199 AND Fosl1 <= 2 AND Tcf7 > 0 AND Perp <= 8 AND Clca2 <= 0 AND Aqp3 <= 20 AND Cd79b <= 570 AND Myb <= 1 AND Prss2 <= 1 AND Guca2a <= 0 AND Gc > 0 AND C1qc <= 12	Thymus
Rule113	Ptprcap > 7 AND Ccr9 > 1 AND Siglech <= 199 AND Fosl1 <= 2 AND Tcf7 > 0 AND Perp <= 8 AND Clca2 <= 0 AND Aqp3 <= 20 AND Cd79b <= 570 AND Myb <= 1 AND Prss2 <= 1 AND Guca2a <= 0 AND Krt8 <= 2 AND 2210415F13Rik <= 0 AND Myb > 0 AND Tcf7 > 65	Thymus
Rule114	Ptprcap > 7 AND Ccr9 > 1 AND Siglech <= 199 AND Fosl1 <= 2 AND Tcf7 > 0 AND Perp <= 8 AND Clca2 > 0 AND Tcf7 <= 652 AND P2ry12 <= 0 AND Coro1a <= 1396	Spleen
Rule115	Ptprcap > 7 AND Ccr9 > 1 AND Siglech <= 199 AND Fosl1 <= 2 AND Tcf7 > 0 AND Lpcat2 <= 5 AND Perp <= 2 AND Myb <= 220 AND Prss2 > 1 AND Cdh1 <= 0 AND Csf1r <= 9	Thymus
Rule116	Ptprcap > 7 AND Ccr9 > 1 AND Siglech <= 199 AND Fosl1 <= 2 AND Tcf7 > 0 AND Lpcat2 <= 5 AND Perp <= 2 AND Myb <= 220 AND Prss2 <= 0 AND 2210415F13Rik <= 0 AND Gc > 0 AND C1qc <= 12	Thymus
Rule117	Ptprcap > 7 AND Ccr9 > 1 AND Siglech <= 199 AND Fosl1 <= 2 AND Tcf7 > 0 AND Lpcat2 <= 5 AND Perp <= 2 AND Myb <= 220 AND Prss2 <= 0 AND 2210415F13Rik <= 0 AND Csf1r <= 1 AND Aqp3 <= 26 AND Ins2 > 0 AND Aqp3 <= 0 AND Klk1 <= 1 AND Sfn <= 61 AND Scgn <= 0 AND Cdx1 <= 0 AND Krt8 <= 5 AND Tspan8 <= 0 AND Gc <= 1 AND Slc2a5 <= 0 AND Lgals7 <= 6 AND Csf1r <= 0 AND Fcrls <= 0 AND Cpa1 <= 0 AND Ctrb1 <= …	Thymus
Rule118	Ptprcap > 7 AND Cd3e <= 1 AND Dsp <= 6 AND Fcrls <= 6 AND Tmem119 <= 9 AND Pnlip <= 0 AND Fosl1 <= 2 AND Gpx2 <= 1 AND Prss2 <= 0 AND Cela2a <= 0 AND Cd79b > 270 AND Tcf7 <= 2 AND Gc <= 0 AND Resp18 <= 0 AND Epcam <= 203 AND Krt13 <= 0 AND Krt6a <= 0 AND Chga <= 0 AND Ccr9 <= 2 AND Dmkn <= 0 AND Siglech <= 0 AND Ttr <= 0 AND Ins2 <= 4 AND Trim29 <= 0 AND C1qc <= 0 AND P2ry13 <= 0 AND Mobp <= 1 AN…	Spleen
Rule119	Ptprcap > 7 AND Cd3e <= 1 AND Dsp <= 6 AND Fcrls <= 6 AND Tmem119 <= 9 AND Pnlip <= 0 AND Fosl1 <= 2 AND Gpx2 <= 1 AND Prss2 <= 0 AND Cela2a <= 0 AND Cd79b > 264 AND Tcf7 <= 2 AND Gc <= 0 AND Resp18 <= 0 AND Krt6a <= 0 AND Krt13 <= 0 AND Chga <= 0 AND Ccr9 <= 2 AND Epcam <= 23 AND Ins2 <= 4 AND Dmkn <= 0 AND P2ry13 <= 0 AND C1qc <= 0 AND Perp <= 0 AND Dmbt1 <= 0 AND Cd8a <= 0 AND Krt15 <= 1 AND T…	Spleen
Rule120	Ptprcap > 7 AND Cd3e <= 1 AND Dsp <= 6 AND Fcrls <= 6 AND Tmem119 <= 9 AND Pnlip <= 0 AND Fosl1 <= 2 AND Gpx2 <= 1 AND Prss2 <= 0 AND Cela2a <= 0 AND Cd79b > 264 AND Tcf7 <= 2 AND Gc <= 0 AND Resp18 <= 0 AND Krt6a <= 0 AND Krt13 <= 0 AND Chga <= 0 AND Ccr9 <= 2 AND Epcam <= 23 AND Ins2 <= 4 AND Dmkn <= 0 AND P2ry13 <= 0 AND C1qc <= 0 AND Perp <= 0 AND Dmbt1 <= 0 AND Ptprc > 3 AND Cd8a <= 0 AND Mo…	Spleen
Rule121	Ptprcap > 7 AND Cd3e <= 1 AND Dsp <= 6 AND Fcrls <= 6 AND Tmem119 <= 9 AND Pnlip <= 0 AND Fosl1 <= 2 AND Gpx2 <= 1 AND Prss2 <= 0 AND Cela2a <= 0 AND Cd79b > 264 AND Tcf7 <= 2 AND Gc <= 0 AND Resp18 <= 0 AND Krt6a <= 0 AND Krt13 <= 0 AND Chga <= 0 AND Ccr9 <= 2 AND Epcam <= 23 AND Ins2 <= 4 AND Dmkn <= 0 AND P2ry13 <= 0 AND C1qc <= 0 AND Siglech <= 0 AND Fcrls <= 0 AND Ttr <= 0 AND C1qb <= 0 AND …	Spleen
Rule122	Ptprcap > 7 AND Cd3e <= 1 AND Dsp <= 6 AND Fcrls <= 6 AND Tmem119 <= 9 AND Pnlip <= 0 AND Fosl1 <= 2 AND Gpx2 <= 1 AND Prss2 <= 0 AND Cela2a <= 0 AND Cd79b > 264 AND Tcf7 <= 2 AND Gc <= 0 AND Resp18 <= 0 AND Krt6a <= 0 AND Krt13 <= 0 AND Chga <= 0 AND Ccr9 <= 2 AND Epcam <= 23 AND Ins2 <= 4 AND Dmkn <= 0 AND P2ry13 <= 0 AND C1qc <= 0 AND Siglech <= 0 AND Fcrls <= 0 AND Ttr <= 0 AND Dmbt1 <= 0 AND…	Spleen
Rule123	Ptprcap > 7 AND Cd3e <= 1 AND Dsp <= 6 AND Fcrls <= 6 AND Tmem119 <= 9 AND Pnlip <= 0 AND Fosl1 <= 2 AND Gpx2 <= 1 AND Prss2 <= 0 AND Cela2a <= 0 AND Cd79b > 264 AND Tcf7 <= 2 AND Gc <= 0 AND Resp18 <= 0 AND Krt6a <= 0 AND Krt13 <= 0 AND Chga <= 0 AND Ccr9 <= 2 AND Epcam <= 23 AND Ins2 <= 4 AND Dmkn <= 0 AND P2ry13 <= 0 AND C1qc <= 0 AND Siglech <= 0 AND Fcrls <= 0 AND Ttr <= 0 AND Dmbt1 <= 0 AND…	Spleen
Rule124	Ptprcap > 7 AND Cd3e <= 1 AND Dsp <= 6 AND Fcrls <= 6 AND Tmem119 <= 9 AND Pnlip <= 0 AND Fosl1 <= 2 AND Gpx2 <= 1 AND Prss2 <= 0 AND Cela2a <= 0 AND Cd79b > 264 AND Tcf7 <= 2 AND Gc <= 0 AND Resp18 <= 0 AND Krt6a <= 0 AND Krt13 <= 0 AND Chga <= 0 AND Ccr9 <= 2 AND Epcam <= 23 AND Ins2 <= 4 AND Dmkn <= 0 AND P2ry13 <= 0 AND C1qc <= 0 AND Siglech <= 0 AND Fcrls <= 0 AND Ttr <= 0 AND Dmbt1 <= 0 AND…	Spleen
Rule125	Ptprcap > 7 AND Cd3e <= 1 AND Dsp <= 6 AND Fcrls <= 6 AND Tmem119 <= 9 AND Pnlip <= 0 AND Fosl1 <= 2 AND Gpx2 <= 1 AND Prss2 <= 0 AND Cela2a <= 0 AND Cd79b > 264 AND Tcf7 <= 2 AND Gc <= 0 AND Resp18 <= 0 AND Krt6a <= 0 AND Krt13 <= 0 AND Chga <= 0 AND Ccr9 <= 0 AND Epcam > 23 AND Perp <= 0 AND Siglech <= 0 AND Anxa8 <= 1 AND Ckmt1 <= 0 AND Trem2 <= 0 AND Dsc3 <= 0 AND Krt14 <= 2 AND Ttr <= 0 AND …	Spleen
Rule126	Ptprcap > 7 AND 1190003J15Rik > 3 AND Scel > 2	Skin
Rule127	Ptprcap > 7 AND Cd3e <= 1 AND Dsp <= 6 AND Fcrls <= 6 AND Tmem119 <= 9 AND Pnlip <= 0 AND Fosl1 <= 2 AND Gpx2 <= 1 AND Prss2 <= 0 AND Cela2a <= 0 AND P2ry12 > 5 AND Cd3e <= 0 AND Ins2 <= 4 AND Gpr34 <= 8 AND Hexb <= 266 AND Trem2 <= 2 AND Cd79b <= 255	Marrow
Rule128	Ptprcap > 7 AND Cd3e <= 1 AND Dsp <= 6 AND Fcrls <= 6 AND Tmem119 <= 9 AND Pnlip <= 0 AND Fosl1 <= 2 AND Gpx2 <= 1 AND Prss2 <= 0 AND Cela2a <= 0 AND Cd79b > 270 AND Epcam <= 23 AND Tcf7 <= 52 AND Gc <= 0 AND Resp18 <= 0 AND Krt13 <= 0 AND Ccr9 <= 2 AND Cd8b1 <= 0 AND Ins2 <= 3 AND Krt6a <= 0 AND Chga <= 0 AND P2ry13 <= 0 AND C1qc <= 0 AND Dmkn <= 0 AND Dmbt1 <= 0 AND Perp <= 0 AND Ptprc > 3 AND …	Marrow
Rule129	Ptprcap > 7 AND Cd3e <= 1 AND Dsp <= 6 AND Fcrls <= 6 AND Tmem119 <= 9 AND Pnlip <= 0 AND Fosl1 <= 2 AND Gpx2 <= 1 AND Prss2 <= 0 AND Cela2a <= 0 AND Cd79b > 270 AND Epcam <= 23 AND Tcf7 <= 52 AND Gc <= 0 AND Resp18 <= 0 AND Krt13 <= 0 AND Ccr9 <= 2 AND Cd8b1 <= 0 AND Ins2 <= 3 AND Krt6a <= 0 AND Chga <= 0 AND P2ry13 <= 0 AND C1qc <= 0 AND Dmkn <= 0 AND Dmbt1 <= 0 AND Perp <= 0 AND Ptprc > 3 AND …	Spleen
Rule130	Ptprcap > 7 AND Cd3e <= 1 AND Dsp <= 6 AND Fcrls <= 6 AND Tmem119 <= 9 AND Pnlip <= 0 AND Fosl1 <= 2 AND Gpx2 <= 1 AND Prss2 <= 0 AND Cela2a <= 0 AND Cd79b > 270 AND Epcam <= 23 AND Tcf7 <= 52 AND Gc <= 0 AND Resp18 <= 0 AND Krt13 <= 0 AND Ccr9 <= 2 AND Cd8b1 <= 0 AND Ins2 <= 3 AND Krt6a <= 0 AND Chga <= 0 AND P2ry13 <= 0 AND C1qc <= 0 AND Dmkn <= 0 AND Perp <= 0 AND Dmbt1 <= 0 AND Ptprc > 3 AND …	Spleen
Rule131	Ptprcap > 7 AND Cd3e <= 1 AND Dsp <= 6 AND Fcrls <= 6 AND Tmem119 <= 9 AND Pnlip <= 0 AND Fosl1 <= 2 AND Gpx2 <= 1 AND Prss2 <= 0 AND Cela2a <= 0 AND Cd79b > 270 AND Epcam <= 23 AND Tcf7 <= 52 AND Gc <= 0 AND Resp18 <= 0 AND Krt13 <= 0 AND Ccr9 <= 2 AND Cd8b1 <= 0 AND Ins2 <= 3 AND Krt6a <= 0 AND Chga <= 0 AND P2ry13 <= 0 AND C1qc <= 0 AND Dmkn <= 0 AND Perp <= 0 AND Dmbt1 <= 0 AND Ttr <= 0 AND F…	Spleen
Rule132	Ptprcap > 7 AND Cd3e <= 1 AND Dsp <= 6 AND Fcrls <= 6 AND Tmem119 <= 9 AND Pnlip <= 0 AND Fosl1 <= 2 AND Gpx2 <= 1 AND Prss2 <= 0 AND Cela2a <= 0 AND Cd79b > 270 AND Tcf7 <= 2 AND Epcam <= 23 AND Gc <= 0 AND Resp18 <= 0 AND Ccr9 <= 2 AND Krt13 <= 0 AND Cd8b1 <= 0 AND Krt6a <= 0 AND Chga <= 0 AND Ins2 <= 4 AND P2ry13 <= 0 AND C1qc <= 0 AND Fcrls <= 0 AND Dmkn <= 0 AND Ttr <= 0 AND Perp <= 0 AND Mo…	Spleen
Rule133	Ptprcap > 7 AND Cd3e <= 1 AND Dsp <= 6 AND Fcrls <= 6 AND Tmem119 <= 9 AND Pnlip <= 0 AND Fosl1 <= 2 AND Gpx2 <= 1 AND Prss2 <= 0 AND Cela2a <= 0 AND Cd79b > 270 AND Tcf7 <= 2 AND Epcam <= 23 AND Gc <= 0 AND Resp18 <= 0 AND Ccr9 <= 2 AND Krt13 <= 0 AND Cd8b1 <= 0 AND Krt6a <= 0 AND Chga <= 0 AND Ins2 <= 4 AND P2ry13 <= 0 AND C1qc <= 0 AND Fcrls <= 0 AND Dmkn <= 0 AND Ttr <= 0 AND Perp <= 0 AND Mo…	Marrow
Rule134	Ptprcap > 7 AND Cd3e <= 1 AND Dsp <= 6 AND Fcrls <= 6 AND Tmem119 <= 9 AND Pnlip <= 0 AND Fosl1 <= 2 AND Gpx2 <= 1 AND Prss2 <= 0 AND Cela2a <= 0 AND Cd79b > 270 AND Tcf7 <= 2 AND Epcam <= 23 AND Gc <= 0 AND Resp18 <= 0 AND Ccr9 <= 2 AND Krt13 <= 0 AND Cd8b1 <= 0 AND Krt6a <= 0 AND Chga <= 0 AND Ins2 <= 4 AND P2ry13 <= 0 AND C1qc <= 0 AND Fcrls <= 0 AND Dmkn <= 0 AND Ttr <= 0 AND Perp <= 0 AND Mo…	Marrow
Rule135	Ptprcap > 7 AND Cd3e <= 1 AND Dsp <= 6 AND Fcrls <= 6 AND Tmem119 <= 9 AND Pnlip <= 0 AND Fosl1 <= 2 AND Gpx2 <= 1 AND Prss2 <= 0 AND Cela2a <= 0 AND Cd79b > 270 AND Tcf7 <= 2 AND Epcam <= 23 AND Gc <= 0 AND Resp18 <= 0 AND Ccr9 <= 2 AND Cd8b1 <= 0 AND Krt13 <= 0 AND Krt6a <= 0 AND Chga <= 0 AND Ins2 <= 4 AND P2ry13 <= 0 AND C1qc <= 0 AND Fcrls <= 0 AND Dmkn <= 0 AND Ttr <= 0 AND Perp <= 0 AND Mo…	Spleen
Rule136	Ptprcap > 7 AND Cd3e <= 1 AND Dsp <= 6 AND Fcrls <= 6 AND Tmem119 <= 9 AND Pnlip <= 0 AND Fosl1 <= 2 AND Gpx2 <= 1 AND Prss2 <= 0 AND Cela2a <= 0 AND Cd79b > 270 AND Tcf7 <= 2 AND Epcam <= 23 AND Gc <= 0 AND Resp18 <= 0 AND Ccr9 <= 2 AND Krt13 <= 0 AND Cd8b1 <= 0 AND Ins2 <= 3 AND Krt6a <= 0 AND Chga <= 0 AND P2ry13 <= 0 AND C1qc <= 0 AND Fcrls <= 0 AND Anxa8 <= 0 AND Dmkn <= 0 AND C1qb <= 0 AND …	Marrow
Rule137	Ptprcap > 7 AND Cd3e <= 1 AND Dsp <= 6 AND Fcrls <= 6 AND Tmem119 <= 9 AND Pnlip <= 0 AND Fosl1 <= 2 AND Gpx2 <= 1 AND Prss2 <= 0 AND Cela2a <= 0 AND Cd79b > 270 AND Tcf7 <= 2 AND Epcam <= 23 AND Gc <= 0 AND Resp18 <= 0 AND Ccr9 <= 2 AND Krt13 <= 0 AND Cd8b1 <= 0 AND Ins2 <= 3 AND Krt6a <= 0 AND Chga <= 0 AND P2ry13 <= 0 AND C1qc <= 0 AND Fcrls <= 0 AND Anxa8 <= 0 AND Dmkn <= 0 AND C1qb <= 0 AND …	Spleen
Rule138	Ptprcap > 7 AND Ttr > 3 AND Siglech <= 2 AND Fxyd3 <= 4 AND Sfn <= 18 AND Tmem27 <= 0 AND Fosl1 <= 3 AND Cd3e > 1	Liver
Rule139	Ptprcap > 7 AND Cd3e <= 1 AND Dsp <= 6 AND Fcrls <= 6 AND Tmem119 <= 9 AND Pnlip <= 0 AND Fosl1 <= 2 AND Gpx2 <= 1 AND Prss2 <= 0 AND Cela2a <= 0 AND Cd79b > 270 AND Tcf7 <= 2 AND Epcam <= 23 AND Gc <= 0 AND Resp18 <= 0 AND Ccr9 <= 2 AND Krt13 <= 0 AND Cd8b1 <= 0 AND Ins2 <= 3 AND Krt6a <= 0 AND Chga <= 0 AND P2ry13 <= 0 AND C1qc <= 0 AND Fcrls <= 0 AND Anxa8 <= 0 AND Dmkn <= 0 AND C1qb <= 0 AND …	Marrow
Rule140	Ptprcap > 7 AND Cd3e <= 1 AND Dsp <= 6 AND Fcrls <= 6 AND Tmem119 <= 9 AND Pnlip <= 0 AND Fosl1 <= 2 AND Gpx2 <= 1 AND Prss2 <= 0 AND Cela2a <= 0 AND Cd79b > 270 AND Tcf7 <= 2 AND Epcam <= 23 AND Gc <= 0 AND Resp18 <= 0 AND Ccr9 <= 2 AND Krt13 <= 0 AND Cd8b1 <= 0 AND Ins2 <= 3 AND Krt6a <= 0 AND Chga <= 0 AND P2ry13 <= 0 AND C1qc <= 0 AND Fcrls <= 0 AND Anxa8 <= 0 AND Dmkn <= 0 AND Ttr <= 0 AND C…	Marrow
Rule141	Ptprcap > 7 AND Cd3e <= 1 AND Dsp <= 6 AND Fcrls <= 6 AND Tmem119 <= 9 AND Pnlip <= 0 AND Fosl1 <= 2 AND Gpx2 <= 1 AND Prss2 <= 0 AND Cela2a <= 0 AND Cd79b > 270 AND Tcf7 <= 2 AND Epcam <= 23 AND Gc <= 0 AND Resp18 <= 0 AND Ccr9 <= 2 AND Krt13 <= 0 AND Cd8b1 <= 0 AND Ins2 <= 3 AND Krt6a <= 0 AND Chga <= 0 AND P2ry13 <= 0 AND C1qc <= 0 AND Dmkn <= 0 AND Perp <= 0 AND Dmbt1 <= 0 AND Ttr <= 0 AND Fc…	Marrow
Rule142	Ptprcap > 7 AND Cd3e <= 1 AND Dsp <= 6 AND Fcrls <= 6 AND Tmem119 <= 9 AND Pnlip <= 0 AND Fosl1 <= 2 AND Gpx2 <= 1 AND Prss2 <= 0 AND Cela2a <= 0 AND Cd79b > 270 AND Tcf7 <= 2 AND Epcam <= 23 AND Gc <= 0 AND Resp18 <= 0 AND Ccr9 <= 2 AND Cd8b1 <= 0 AND Krt13 <= 0 AND Ins2 <= 3 AND Krt6a <= 0 AND Chga <= 0 AND P2ry13 <= 0 AND C1qc <= 0 AND Dmkn <= 0 AND Perp <= 0 AND Dmbt1 <= 0 AND Ttr <= 0 AND Fc…	Spleen
Rule143	Ptprcap > 7 AND Cd3e <= 1 AND Dsp <= 6 AND Fcrls <= 6 AND Tmem119 <= 9 AND Pnlip <= 0 AND Fosl1 <= 2 AND Gpx2 <= 1 AND Prss2 <= 0 AND Cela2a <= 0 AND Cd79b > 270 AND Tcf7 <= 2 AND Epcam <= 23 AND Gc <= 0 AND Resp18 <= 0 AND Ccr9 <= 2 AND Krt13 <= 0 AND Cd8b1 <= 0 AND Ins2 <= 3 AND Krt6a <= 0 AND Chga <= 0 AND P2ry13 <= 0 AND C1qc <= 0 AND Anxa8 <= 0 AND Dmkn <= 0 AND Fcrls <= 0 AND Ttr <= 0 AND C…	Marrow
Rule144	Ptprcap > 7 AND Cd3e <= 1 AND Dsp <= 6 AND Fcrls <= 6 AND Tmem119 <= 9 AND Pnlip <= 0 AND Fosl1 <= 2 AND Gpx2 <= 1 AND Prss2 <= 0 AND Cela2a <= 0 AND Cd79b > 270 AND Tcf7 <= 2 AND Epcam <= 23 AND Gc <= 0 AND Resp18 <= 0 AND Ccr9 <= 2 AND Krt13 <= 0 AND Cd8b1 <= 0 AND Ins2 <= 3 AND Krt6a <= 0 AND Chga <= 0 AND P2ry13 <= 0 AND C1qc <= 0 AND Anxa8 <= 0 AND Dmkn <= 0 AND Fcrls <= 0 AND Ttr <= 0 AND C…	Spleen
Rule145	Ptprcap > 7 AND Cd3e <= 1 AND Dsp <= 6 AND Fcrls <= 6 AND Tmem119 <= 9 AND Pnlip <= 0 AND Fosl1 <= 2 AND Gpx2 <= 1 AND Prss2 <= 0 AND Cela2a <= 0 AND Cd79b > 270 AND Tcf7 <= 2 AND Epcam <= 23 AND Gc <= 0 AND Resp18 <= 0 AND Ccr9 <= 2 AND Krt13 <= 0 AND Cd8b1 <= 0 AND Ins2 <= 3 AND Krt6a <= 0 AND Chga <= 0 AND P2ry13 <= 0 AND C1qc <= 0 AND Anxa8 <= 0 AND Dmkn <= 0 AND Fcrls <= 0 AND Ttr <= 0 AND C…	Marrow
Rule146	Ptprcap > 7 AND Cd3e <= 1 AND Dsp <= 6 AND Fcrls <= 6 AND Tmem119 <= 9 AND Pnlip <= 0 AND Fosl1 <= 2 AND Gpx2 <= 1 AND Prss2 <= 0 AND Cela2a <= 0 AND Cd79b > 270 AND Tcf7 <= 2 AND Epcam <= 23 AND Gc <= 0 AND Resp18 <= 0 AND Ccr9 <= 2 AND Krt13 <= 0 AND Cd8b1 <= 0 AND Krt6a <= 0 AND Chga <= 0 AND Ins2 <= 6 AND P2ry13 <= 0 AND C1qc <= 0 AND Fcrls <= 0 AND Anxa8 <= 0 AND Dmkn <= 0 AND Ttr <= 0 AND P…	Spleen
Rule147	Ptprcap > 7 AND Cd3e <= 1 AND Dsp <= 6 AND Fcrls <= 6 AND Tmem119 <= 9 AND Pnlip <= 0 AND Fosl1 <= 2 AND Gpx2 <= 1 AND Prss2 <= 0 AND Cela2a <= 0 AND Cd79b > 270 AND Tcf7 <= 2 AND Epcam <= 23 AND Gc <= 0 AND Resp18 <= 0 AND Ccr9 <= 2 AND Krt13 <= 0 AND Cd8b1 <= 0 AND Ins2 <= 3 AND Krt6a <= 0 AND Chga <= 0 AND P2ry13 <= 0 AND C1qc <= 0 AND Anxa8 <= 0 AND Dmkn <= 0 AND Epcam <= 1 AND Fcrls <= 0 AND…	Spleen
Rule148	Ptprcap > 7 AND Cd3e <= 1 AND Dsp <= 6 AND Fcrls <= 6 AND Tmem119 <= 9 AND Pnlip <= 0 AND Fosl1 <= 2 AND P2ry12 <= 3 AND Prss2 <= 0 AND Cela2a <= 0 AND Cd79b > 270 AND Oit1 > 1 AND Krt15 <= 0 AND Krt14 > 1	Lung
Rule149	Ptprcap > 7 AND Cd3e <= 1 AND Dsp <= 6 AND Fcrls <= 6 AND Tmem119 <= 9 AND Pnlip <= 0 AND Fosl1 <= 2 AND Prss2 <= 0 AND P2ry12 <= 3 AND Cela2a <= 0 AND Cd79b > 270 AND Tcf7 <= 2 AND Epcam <= 23 AND Gc <= 0 AND Ccr9 <= 2 AND Resp18 <= 0 AND Krt13 <= 0 AND Krt6a <= 0 AND Chga <= 0 AND Ins2 <= 6 AND Dmbt1 > 0 AND Anxa8 <= 0 AND Cd79b > 422 AND Csf1r <= 0 AND Serpinb5 <= 0 AND Eps8l3 <= 0 AND C1qa <=…	Spleen
Rule150	Ptprcap > 7 AND Cd3e <= 1 AND Dsp <= 6 AND Fcrls <= 6 AND Tmem119 <= 9 AND Pnlip <= 0 AND Fosl1 <= 2 AND Prss2 <= 0 AND P2ry12 <= 3 AND Cela2a <= 0 AND Cd79b > 270 AND Tcf7 <= 2 AND Epcam <= 23 AND Gc <= 0 AND Ccr9 <= 2 AND Resp18 <= 0 AND Krt13 <= 0 AND Krt6a <= 0 AND Dmbt1 <= 0 AND Chga <= 0 AND Ins2 <= 6 AND P2ry13 <= 0 AND Dmkn <= 0 AND C1qc <= 1 AND Siglech <= 0 AND Cx3cr1 <= 0 AND Epcam <= …	Marrow
Rule151	Ptprcap > 7 AND Cd3e <= 1 AND Dsp <= 6 AND Fcrls <= 6 AND Tmem119 <= 9 AND Pnlip <= 0 AND Fosl1 <= 2 AND Prss2 <= 0 AND P2ry12 <= 3 AND Cela2a <= 0 AND Cd79b > 270 AND Tcf7 <= 2 AND Epcam <= 23 AND Gc <= 0 AND Ccr9 <= 2 AND Resp18 <= 0 AND Krt13 <= 0 AND Krt6a <= 0 AND Dmbt1 <= 0 AND Chga <= 0 AND Ins2 <= 6 AND Dmkn <= 0 AND P2ry13 <= 0 AND C1qc <= 1 AND Siglech <= 0 AND Cx3cr1 <= 0 AND Epcam <= …	Spleen
Rule152	Ptprcap > 7 AND Cd3e <= 1 AND Dsp <= 6 AND Fcrls <= 6 AND Tmem119 <= 9 AND Pnlip <= 0 AND Fosl1 <= 2 AND P2ry12 <= 4 AND Prss2 <= 0 AND Cela2a <= 0 AND Cd79b > 270 AND Tcf7 <= 2 AND Epcam <= 23 AND Gc <= 0 AND Ccr9 <= 2 AND Resp18 <= 0 AND Krt13 <= 0 AND Cd8b1 <= 0 AND Ins2 <= 3 AND Krt6a <= 0 AND Dmbt1 > 0 AND Anxa8 <= 0 AND Cd79b > 451 AND B4galnt2 <= 0 AND Oit1 <= 0 AND Epcam <= 0 AND Dmbt1 <=…	Marrow
Rule153	Ptprcap > 7 AND Cd3e <= 1 AND Dsp <= 6 AND Fcrls <= 6 AND Tmem119 <= 9 AND Pnlip <= 0 AND Fosl1 <= 2 AND P2ry12 <= 4 AND Prss2 <= 0 AND Cela2a <= 0 AND Cd79b > 270 AND Tcf7 <= 2 AND Epcam <= 23 AND Gc <= 0 AND Ccr9 <= 2 AND Resp18 <= 0 AND Krt13 <= 0 AND Cd8b1 <= 0 AND Ins2 <= 3 AND Krt6a <= 0 AND Chga <= 0 AND P2ry13 <= 0 AND C1qc <= 0 AND Epcam <= 1 AND Anxa8 <= 0 AND Dmkn <= 0 AND C1qb <= 0 AN…	Spleen
Rule154	Ptprcap > 7 AND Cd3e <= 1 AND Dsp <= 6 AND Fcrls <= 6 AND Tmem119 <= 9 AND Pnlip <= 0 AND Fosl1 <= 2 AND P2ry12 <= 4 AND Prss2 <= 0 AND Cela2a <= 0 AND Cd79b > 270 AND Tcf7 <= 2 AND Epcam <= 23 AND Gc <= 0 AND Ccr9 <= 2 AND Resp18 <= 0 AND Krt13 <= 0 AND Cd8b1 <= 0 AND Ins2 <= 3 AND Krt6a <= 0 AND Chga <= 0 AND P2ry13 <= 0 AND C1qc <= 0 AND Epcam <= 1 AND Anxa8 <= 0 AND Dmkn <= 0 AND C1qb <= 0 AN…	Marrow
Rule155	Ptprcap > 7 AND Cd3e <= 1 AND Dsp <= 6 AND Fcrls <= 6 AND Tmem119 <= 9 AND Pnlip <= 0 AND Fosl1 <= 2 AND P2ry12 <= 4 AND Prss2 <= 0 AND Cela2a <= 0 AND Cd79b > 270 AND Tcf7 <= 2 AND Epcam <= 23 AND Gc <= 0 AND Ccr9 <= 2 AND Resp18 <= 0 AND Krt13 <= 0 AND Cd8b1 <= 0 AND Ins2 <= 3 AND Krt6a <= 0 AND Chga <= 0 AND P2ry13 <= 0 AND C1qc <= 0 AND Epcam <= 1 AND Anxa8 <= 0 AND Dmkn <= 0 AND C1qb <= 0 AN…	Spleen
Rule156	Ptprcap > 7 AND Cd3e <= 1 AND Dsp <= 6 AND Fcrls <= 6 AND Tmem119 <= 9 AND Pnlip <= 0 AND Fosl1 <= 2 AND P2ry12 <= 4 AND Prss2 <= 0 AND Cela2a <= 0 AND Resp18 <= 0 AND Cd79b > 270 AND Tcf7 <= 2 AND Epcam <= 23 AND Gc <= 0 AND Ccr9 <= 2 AND Krt13 <= 0 AND Cd8b1 <= 0 AND Ins2 <= 3 AND Krt6a <= 0 AND Chga <= 0 AND P2ry13 <= 0 AND C1qc <= 0 AND Epcam <= 1 AND Anxa8 <= 0 AND Dmkn <= 0 AND C1qb <= 0 AN…	Marrow
Rule157	Ptprcap > 7 AND Cd3e <= 1 AND Dsp <= 6 AND Fcrls <= 6 AND Tmem119 <= 9 AND Pnlip <= 0 AND Fosl1 <= 2 AND P2ry12 <= 4 AND Prss2 <= 0 AND Cela2a <= 0 AND Resp18 <= 0 AND Cd79b > 270 AND Tcf7 <= 2 AND Epcam <= 23 AND Gc <= 0 AND Ccr9 <= 2 AND Krt13 <= 0 AND Cd8b1 <= 0 AND Ins2 <= 3 AND Krt6a <= 0 AND Chga <= 0 AND P2ry13 <= 0 AND C1qc <= 0 AND Perp <= 0 AND Dmkn <= 0 AND Epcam <= 1 AND Mobp <= 0 AND…	Spleen
Rule158	Ptprcap > 7 AND Cd3e <= 1 AND Dsp <= 6 AND Fcrls <= 6 AND Tmem119 <= 9 AND Pnlip <= 0 AND Fosl1 <= 2 AND P2ry12 <= 4 AND Prss2 <= 0 AND Cela2a <= 0 AND Resp18 <= 0 AND Cd79b > 270 AND Tcf7 <= 2 AND Epcam <= 23 AND Gc <= 0 AND Ccr9 <= 2 AND Krt13 <= 0 AND Cd8b1 <= 0 AND Ins2 <= 3 AND Krt6a <= 0 AND Chga <= 0 AND P2ry13 <= 0 AND C1qc <= 0 AND Perp <= 0 AND Dmkn <= 0 AND Epcam <= 1 AND Mobp <= 0 AND…	Spleen
Rule159	Ptprcap > 7 AND Cd3e <= 1 AND Dsp <= 6 AND Fcrls <= 6 AND Tmem119 <= 9 AND Pnlip <= 0 AND Fosl1 <= 2 AND P2ry12 <= 4 AND Prss2 <= 0 AND Cela2a <= 0 AND Resp18 <= 0 AND Cd79b > 270 AND Tcf7 <= 2 AND Epcam <= 23 AND Gc <= 0 AND Ccr9 <= 2 AND Krt13 <= 0 AND Cd8b1 <= 0 AND Ins2 <= 3 AND Krt6a <= 0 AND Chga <= 0 AND P2ry13 <= 0 AND C1qc <= 0 AND Cx3cr1 <= 0 AND C1qb <= 0 AND Cd8a <= 0 AND Fcrls <= 0 A…	Spleen
Rule160	Ptprcap > 7 AND Cd3e <= 1 AND Dsp <= 6 AND Fcrls <= 6 AND Tmem119 <= 9 AND Pnlip <= 0 AND Fosl1 <= 2 AND P2ry12 <= 4 AND Prss2 <= 0 AND Cela2a <= 0 AND Resp18 <= 0 AND Cd79b > 270 AND Tcf7 <= 2 AND Epcam <= 23 AND Gc <= 0 AND Ccr9 <= 2 AND Krt13 <= 0 AND Krt6a <= 0 AND Chga <= 0 AND Ins2 <= 6 AND Perp <= 0 AND Dmkn <= 0 AND C1qc <= 1 AND P2ry13 <= 0 AND Cx3cr1 <= 0 AND Cd8a <= 0 AND Epcam <= 1 AN…	Spleen
Rule161	Ptprcap > 7 AND Cd3e <= 1 AND Dsp <= 6 AND Fcrls <= 6 AND Tmem119 <= 9 AND Pnlip <= 0 AND Fosl1 <= 2 AND P2ry12 <= 4 AND Prss2 <= 0 AND Cela2a <= 0 AND Resp18 <= 0 AND Cd79b > 270 AND Tcf7 <= 2 AND Epcam <= 23 AND Gc <= 0 AND Ccr9 <= 2 AND Ins2 <= 6 AND Krt6a <= 0 AND Krt13 <= 0 AND Chga <= 0 AND Perp <= 0 AND Dmkn <= 0 AND C1qc <= 1 AND P2ry13 <= 0 AND Cx3cr1 <= 0 AND Cd8a <= 0 AND Epcam <= 1 AN…	Spleen
Rule162	Ptprcap > 7 AND Cd3e <= 1 AND Dsp <= 6 AND Fcrls <= 6 AND Tmem119 <= 9 AND Pnlip <= 0 AND Fosl1 <= 2 AND P2ry12 <= 4 AND Prss2 <= 0 AND Cela2a <= 0 AND Resp18 <= 0 AND Cd79b > 270 AND Tcf7 <= 2 AND Epcam <= 23 AND Gc <= 0 AND Ccr9 <= 2 AND Ins2 <= 6 AND Krt6a <= 0 AND Krt13 <= 0 AND Chga <= 0 AND Perp <= 0 AND Dmkn <= 0 AND C1qc <= 1 AND P2ry13 <= 0 AND Cx3cr1 <= 0 AND Cd8a <= 0 AND Epcam > 1 AND…	Marrow
Rule163	Ptprcap > 7 AND Cd3e <= 1 AND Dsp <= 6 AND Fcrls <= 6 AND Tmem119 <= 9 AND Pnlip <= 0 AND Fosl1 <= 2 AND P2ry12 <= 4 AND Prss2 <= 0 AND Cela2a <= 0 AND Resp18 <= 0 AND Cd79b > 270 AND Tcf7 <= 2 AND Epcam <= 23 AND Gc <= 0 AND Ccr9 <= 2 AND Ins2 <= 6 AND Krt6a <= 0 AND Krt13 <= 0 AND Chga <= 0 AND Perp <= 0 AND Dmkn <= 0 AND C1qc <= 1 AND P2ry13 <= 0 AND Cx3cr1 <= 0 AND Cd8a <= 0 AND Epcam > 1 AND…	Spleen
Rule164	Ptprcap > 7 AND Cd3e <= 1 AND Dsp <= 6 AND Fcrls <= 6 AND Tmem119 <= 9 AND Pnlip <= 0 AND Cela2a <= 0 AND Epcam <= 4 AND Myb > 0 AND Scgn <= 0 AND Siglech > 510 AND P2ry12 <= 0 AND Epcam <= 0	Thymus
Rule165	Ptprcap > 7 AND Cd3e <= 1 AND Dsp <= 6 AND Fcrls <= 6 AND Tmem119 <= 9 AND Pnlip <= 0 AND Cela2a <= 0 AND Epcam <= 4 AND Cd79b > 236 AND Tcf7 <= 2 AND Gc <= 0 AND Resp18 <= 0 AND Ccr9 <= 2 AND Ins2 <= 4 AND Krt6a <= 0 AND Krt13 <= 0 AND Chga <= 0 AND Dmkn <= 0 AND C1qc <= 0 AND P2ry13 <= 0 AND Epcam <= 1 AND Ttr <= 0 AND Cx3cr1 <= 0 AND Perp <= 0 AND C1qb <= 0 AND Cd8a <= 0 AND Fcrls <= 0 AND Dmb…	Spleen
Rule166	Ptprcap > 7 AND Cd3e <= 1 AND Dsp <= 6 AND Fcrls <= 6 AND Tmem119 <= 9 AND Pnlip <= 0 AND Cela2a <= 0 AND Epcam <= 4 AND Cd79b > 236 AND Tcf7 <= 2 AND Gc <= 0 AND Resp18 <= 0 AND Ccr9 <= 2 AND Ins2 <= 4 AND Krt6a <= 0 AND Krt13 <= 0 AND Chga <= 0 AND Dmkn <= 0 AND C1qc <= 0 AND P2ry13 <= 0 AND Epcam <= 1 AND Ttr <= 0 AND Cx3cr1 <= 0 AND Perp <= 0 AND C1qb <= 0 AND Cd8a <= 0 AND Fcrls <= 0 AND Dmb…	Marrow
Rule167	Ptprcap > 7 AND Cd3e <= 1 AND Dsp <= 6 AND Fcrls <= 6 AND Tmem119 <= 9 AND Pnlip <= 0 AND Cela2a <= 0 AND Epcam <= 4 AND Cd79b > 236 AND Tcf7 <= 2 AND Gc <= 0 AND Resp18 <= 0 AND Ccr9 <= 2 AND Ins2 <= 4 AND Krt6a <= 0 AND Krt13 <= 0 AND Chga <= 0 AND Dmkn <= 0 AND C1qc <= 0 AND P2ry13 <= 0 AND Epcam <= 1 AND Ttr <= 0 AND Cx3cr1 <= 0 AND Perp <= 0 AND C1qb <= 0 AND Cd8a <= 0 AND Fcrls <= 0 AND Dmb…	Spleen
Rule168	Pcsk1n > 1 AND Ins2 > 27 AND Tmem119 <= 99 AND Pcsk1n > 4	Pancreas
Rule169	Pcsk1n > 1 AND Ptprc <= 6 AND Pax9 <= 2 AND Tmem27 <= 1 AND Ins2 <= 33 AND Krt8 <= 11 AND Foxf1a <= 11 AND Dsp <= 1 AND Tmem119 <= 155 AND Scgn <= 0 AND Cldn7 <= 2 AND Cdh1 <= 3 AND Try5 <= 0 AND Crybb1 <= 12 AND Pkp1 <= 0 AND Ttr <= 3	Brain Neurons
Rule170	Ptprcap > 3 AND Cd3e > 1 AND 1190003J15Rik > 3 AND Cd79b <= 8 AND Tcf7 <= 39	Liver
Rule171	Ptprcap > 3 AND Cd3e > 1 AND Fosl1 <= 1 AND Lpcat2 <= 5 AND Gc > 2 AND Krt15 <= 1 AND Asb5 <= 1 AND Cd3e <= 100	Liver
Rule172	Ptprcap > 3 AND Cd3e > 1 AND Asb5 > 3 AND Ctsd <= 337	Muscle
Rule173	Ptprcap > 3 AND Cd3e > 1 AND Fosl1 <= 1 AND Lpcat2 <= 5 AND Tmem27 > 2 AND Cd8a <= 814 AND Hexb > 1	Spleen
Rule174	Ptprcap > 3 AND Cd3e > 1 AND Fosl1 <= 1 AND Lpcat2 <= 5 AND Perp <= 5 AND Ccr9 > 1 AND Siglech <= 26 AND Myb > 220 AND Cd3d <= 1196 AND Cd3e > 66	Thymus
Rule175	Ptprcap > 3 AND Cd3e > 1 AND Fosl1 <= 1 AND Lpcat2 <= 5 AND Perp <= 5 AND Foxf1a > 0 AND C1qb <= 10 AND Fam25c <= 1 AND Abcc8 <= 0 AND Sfn <= 5 AND Lgmn <= 8 AND Prss2 <= 23 AND Ccr9 <= 2	Lung
Rule176	Ptprcap > 3 AND Cd3e > 1 AND Fosl1 <= 1 AND Lpcat2 <= 5 AND Perp <= 5 AND Ccr9 > 1 AND Siglech <= 26 AND Myb > 220 AND C1qa <= 0 AND Coro1a <= 1008 AND Cd3g <= 376	Thymus
Rule177	Ptprcap > 3 AND Cd3e > 1 AND Fosl1 <= 1 AND Lpcat2 <= 5 AND Perp <= 5 AND Ccr9 > 1 AND Myb > 220 AND C1qa <= 0 AND Lpcat2 <= 0 AND Cldn7 <= 0 AND Ctrb1 <= 0 AND Cd3d <= 319	Trachea
Rule178	Ptprcap > 3 AND Cd3e > 1 AND Fosl1 <= 1 AND Lpcat2 <= 5 AND Perp <= 5 AND Ccr9 > 1 AND Siglech <= 26 AND Ins2 <= 0 AND Gpr34 <= 296 AND 2210415F13Rik <= 0 AND Chga <= 1 AND Try4 <= 0 AND Guca2a <= 0 AND Cela2a > 0 AND Cldn3 <= 0	Thymus
Rule179	Ptprcap > 3 AND Cd3e > 1 AND Fosl1 <= 1 AND Lpcat2 <= 5 AND Perp <= 5 AND Ccr9 > 1 AND Siglech <= 26 AND Ins2 <= 0 AND Gpr34 <= 296 AND 2210415F13Rik <= 0 AND Try4 > 0 AND Myb <= 34	Thymus
Rule180	Ptprcap > 3 AND Cd3e > 1 AND Fosl1 <= 1 AND Lpcat2 <= 5 AND Perp <= 5 AND Cela2a > 0 AND Cdh1 <= 0 AND Cldn3 <= 4 AND Hpgds <= 20 AND Tmem119 <= 4 AND Epcam <= 6 AND Tm4sf4 <= 0 AND Lgals4 <= 0 AND Rac2 > 2044 AND Krt15 <= 0 AND Csf1r <= 0	Lung
Rule181	Ptprcap > 3 AND Cd3e > 1 AND Fosl1 <= 1 AND Lpcat2 <= 5 AND Perp <= 5 AND Ccr9 > 1 AND Siglech <= 26 AND Ins2 <= 0 AND Gpr34 <= 296 AND Guca2a <= 0 AND 2210415F13Rik <= 0 AND Ttr > 0 AND Rac2 <= 3106	Thymus
Rule182	Ptprcap > 3 AND Cd3e > 1 AND Fosl1 <= 1 AND Lpcat2 <= 5 AND Perp <= 5 AND Ccr9 > 1 AND Siglech <= 26 AND Ins2 <= 0 AND Gpr34 <= 296 AND Chga <= 1 AND Guca2a <= 0 AND 2210415F13Rik <= 0 AND Tcf7 > 990 AND Cela2a <= 0 AND Dmbt1 <= 10 AND Rnase1 <= 0 AND Csf1r <= 8 AND Myb <= 203	Thymus
Rule183	Ptprcap > 3 AND Cd3e <= 1 AND Fxyd3 <= 1 AND Foxf1a > 2 AND Fosl1 <= 17	Lung
Rule184	Ptprcap > 3 AND Cd3e <= 1 AND Fxyd3 <= 1 AND Asb5 > 3 AND Chga <= 0 AND Lpcat2 <= 1 AND Ctsd <= 454	Muscle
Rule185	Ptprcap > 3 AND Cd3e <= 1 AND Fxyd3 <= 1 AND Fcrls <= 6 AND Tmem119 <= 7 AND Pnlip <= 0 AND Cd79b > 100 AND Prss2 <= 0 AND Cela2a <= 0 AND Tcf7 <= 2 AND Epcam <= 23 AND Resp18 > 0 AND Tcf7 <= 0 AND Tmem119 <= 1 AND Dmbt1 <= 0 AND Serpinb5 <= 0 AND Oit1 <= 0 AND Ptprcap > 67 AND Dmkn <= 0 AND Ttr <= 1 AND Siglech <= 0 AND Lgals4 <= 0 AND Sfn <= 0 AND Gpr34 <= 0 AND Hexb <= 110	Marrow
Rule186	Ptprcap > 3 AND Cd3e <= 1 AND Fxyd3 <= 1 AND Fcrls <= 6 AND Tmem119 <= 7 AND Pnlip <= 0 AND Cd79b > 100 AND Prss2 <= 0 AND Cela2a <= 0 AND Tcf7 <= 2 AND Epcam <= 23 AND Ins2 <= 4 AND Ccr9 <= 2 AND Resp18 <= 0 AND Krt13 <= 0 AND Gc <= 0 AND Chga <= 0 AND Krt6a <= 0 AND Cd79b > 409 AND Epcam <= 1 AND Dmkn <= 0 AND C1qc <= 0 AND P2ry13 <= 0 AND Hpgds <= 13 AND Cd8b1 <= 0 AND Krt15 <= 2 AND Lgals7 <=…	Spleen
Rule187	Ptprcap > 3 AND Cd3e <= 1 AND Fxyd3 <= 1 AND Fcrls <= 6 AND Tmem119 <= 7 AND Pnlip <= 0 AND Cd79b > 100 AND Prss2 <= 0 AND Cela2a <= 0 AND Tcf7 <= 2 AND Epcam <= 23 AND Ins2 <= 4 AND Ccr9 <= 2 AND Resp18 <= 0 AND Krt13 <= 0 AND Gc <= 0 AND Chga <= 0 AND Krt6a <= 0 AND Cd79b > 409 AND Guca2a > 0 AND Ptprcap <= 2572 AND Lgals7 <= 0 AND Dmkn <= 0 AND Lypd3 <= 0 AND Lpcat2 <= 198 AND Perp > 0	Marrow
Rule188	Ptprcap > 3 AND Cd3e <= 1 AND Fxyd3 <= 1 AND Fcrls <= 6 AND Fosl1 <= 1 AND Pnlip <= 0 AND Tmem119 > 7 AND C1qa <= 160 AND Lgals7 <= 6 AND Rac2 <= 19 AND Cd79b <= 6	Fat
Rule189	Ptprcap > 3 AND Cd3e <= 1 AND Fxyd3 <= 1 AND Fcrls <= 6 AND Tmem119 <= 9 AND Pnlip <= 0 AND Cd79b > 100 AND Prss2 <= 0 AND Cela2a <= 0 AND Tcf7 <= 2 AND Epcam <= 23 AND Ins2 <= 4 AND Resp18 <= 0 AND Ccr9 <= 2 AND Krt13 <= 0 AND Chga <= 0 AND Gc <= 0 AND Cd79b > 409 AND Lypd3 <= 0 AND Krt6a <= 0 AND Epcam <= 1 AND Dmkn <= 0 AND C1qc <= 0 AND P2ry13 <= 0 AND Cd8b1 <= 0 AND Krt15 <= 2 AND Guca2a > 0…	Marrow
Rule190	Ptprcap > 3 AND Cd3e <= 1 AND Fxyd3 <= 1 AND Fcrls <= 6 AND Tmem119 <= 9 AND Pnlip <= 0 AND Cd79b > 100 AND Prss2 <= 0 AND Cela2a <= 0 AND Tcf7 <= 2 AND Epcam <= 23 AND Ins2 <= 4 AND Resp18 <= 0 AND Ccr9 <= 2 AND Krt13 <= 0 AND Chga <= 0 AND Gc <= 0 AND Krt6a <= 0 AND Cd79b > 409 AND C1qc <= 0 AND Epcam <= 1 AND P2ry13 <= 0 AND Cd8b1 <= 0 AND Hpgds <= 13 AND Trem2 <= 0 AND Mobp <= 1 AND Lypd3 <= …	Marrow
Rule191	Ptprcap > 3 AND Cd3e <= 1 AND Fxyd3 <= 1 AND Fcrls <= 6 AND Tmem119 <= 9 AND Pnlip <= 0 AND Cd79b > 100 AND Prss2 <= 0 AND Cela2a <= 0 AND Tcf7 <= 2 AND Epcam <= 23 AND Ins2 <= 4 AND Resp18 <= 0 AND Ccr9 <= 2 AND Krt13 <= 0 AND Chga <= 0 AND Gc <= 0 AND Krt6a <= 0 AND Cd79b > 409 AND C1qc <= 0 AND Epcam <= 1 AND P2ry13 <= 0 AND Cd8b1 <= 0 AND Hpgds <= 13 AND Trem2 <= 0 AND Lypd3 <= 0 AND Mobp <= …	Spleen
Rule192	Ptprcap > 3 AND Cd3e <= 1 AND Fxyd3 <= 1 AND Fcrls <= 6 AND Tmem119 <= 9 AND Pnlip <= 0 AND Cd79b > 100 AND Prss2 <= 0 AND Cela2a <= 0 AND Tcf7 <= 2 AND Epcam <= 23 AND Ins2 <= 4 AND Resp18 <= 0 AND Krt13 <= 0 AND Ccr9 <= 0 AND Chga <= 0 AND Gc <= 0 AND Cd79b > 409 AND Lypd3 <= 0 AND Krt6a <= 0 AND Epcam <= 1 AND Dmkn <= 0 AND C1qc <= 0 AND P2ry13 <= 0 AND Hpgds <= 13 AND Krt15 <= 2 AND Cd8a <= 0…	Spleen
Rule193	Ptprcap > 3 AND Cd3e <= 1 AND Fxyd3 <= 1 AND Fcrls <= 6 AND Tmem119 <= 9 AND Pnlip <= 0 AND Cd79b > 100 AND Prss2 <= 0 AND Cela2a <= 0 AND Tcf7 <= 2 AND Epcam <= 23 AND Ins2 <= 4 AND Resp18 <= 0 AND Krt13 <= 0 AND Ccr9 <= 0 AND Chga <= 0 AND Gc <= 0 AND Cd79b > 409 AND Lypd3 <= 0 AND Krt6a <= 0 AND Epcam <= 1 AND Anxa8 <= 0 AND C1qc <= 0 AND P2ry13 <= 0 AND Cd8a <= 0 AND Krt15 <= 2 AND Hpgds <= 1…	Spleen
Rule194	Ptprcap > 3 AND Cd3e <= 1 AND Fxyd3 <= 1 AND Fcrls <= 6 AND Tmem119 <= 9 AND Pnlip <= 0 AND Cd79b > 100 AND Prss2 <= 0 AND Cela2a <= 0 AND Tcf7 <= 2 AND Epcam <= 23 AND Ins2 <= 4 AND Krt13 <= 0 AND Resp18 <= 0 AND Ccr9 <= 0 AND Chga <= 0 AND Gc <= 0 AND Cd79b > 409 AND Lypd3 <= 0 AND Krt6a <= 0 AND Klk1 > 0 AND Ttr <= 0 AND Guca2a <= 1 AND Klk1 <= 2 AND Siglech <= 0 AND Tspan8 <= 0 AND Cdhr5 <= 0…	Spleen
Rule195	Ptprcap > 3 AND Cd3e <= 1 AND Fxyd3 <= 1 AND Fcrls <= 6 AND Tmem119 <= 9 AND Pnlip <= 0 AND Cd79b > 100 AND Prss2 <= 0 AND Cela2a <= 0 AND Tcf7 <= 2 AND Epcam <= 23 AND Ins2 <= 4 AND Krt13 <= 0 AND Resp18 <= 0 AND Ccr9 <= 0 AND Klk1 > 0 AND Klk1 <= 67 AND Ttr > 0 AND Pigr <= 0	Fat
Rule196	Ptprcap > 3 AND Cd3e <= 1 AND Fxyd3 <= 1 AND Fcrls <= 6 AND Tmem119 <= 9 AND Pnlip <= 0 AND Cd79b > 100 AND Prss2 <= 0 AND Cela2a <= 0 AND Tcf7 <= 2 AND Epcam <= 23 AND Ins2 <= 4 AND Resp18 <= 0 AND Krt13 <= 0 AND Klk1 > 0 AND Coro1a > 1 AND Tmem27 <= 0 AND Dsp <= 0 AND Sycn <= 0 AND P2ry12 <= 12 AND Chga <= 0 AND C1qc <= 0 AND Tspan8 <= 0 AND Cdx1 <= 0 AND Serpinb5 <= 0 AND Clca2 <= 0 AND Rac2 >…	Marrow
Rule197	Ptprcap > 3 AND Cd3e <= 1 AND Fxyd3 <= 1 AND Fcrls <= 6 AND Tmem119 <= 9 AND Pnlip <= 0 AND Cd79b > 100 AND Prss2 <= 0 AND Cela2a <= 0 AND Tcf7 <= 2 AND Epcam <= 23 AND Ins2 <= 4 AND Resp18 <= 0 AND Krt13 <= 0 AND Ccr9 <= 0 AND Chga <= 0 AND Gc <= 0 AND Cd79b > 409 AND Lypd3 <= 0 AND Klk1 > 0 AND Guca2a <= 1 AND Siglech <= 0 AND Klk1 <= 2 AND Dsp <= 0 AND Sycn <= 0 AND Cdx1 <= 0 AND Serpinb5 <= 0…	Spleen
Rule198	Ptprcap > 3 AND Cd3e <= 1 AND Fxyd3 <= 1 AND Fcrls <= 6 AND Tmem119 <= 9 AND Pnlip <= 0 AND Cd79b > 100 AND Prss2 <= 0 AND Cela2a <= 0 AND Tcf7 <= 2 AND Epcam <= 23 AND Ins2 <= 4 AND Resp18 <= 0 AND Krt13 <= 0 AND Ccr9 <= 0 AND Klk1 > 0 AND Klk1 <= 67 AND Ptprcap <= 3488 AND Dsp <= 0 AND Sycn <= 0 AND Tspan8 <= 0 AND Cdx1 <= 0 AND Chga <= 0 AND C1qc <= 0 AND Serpinb5 <= 0 AND Cx3cr1 <= 0 AND Tmem…	Marrow
Rule199	Ptprcap > 3 AND Cd3e <= 1 AND Fxyd3 <= 1 AND Fcrls <= 6 AND Tmem119 <= 9 AND Pnlip <= 0 AND Cd79b > 100 AND Prss2 <= 0 AND Cela2a <= 0 AND Tcf7 <= 2 AND Epcam <= 23 AND Ins2 <= 4 AND Resp18 <= 0 AND Krt13 <= 0 AND Ccr9 <= 0 AND Chga <= 0 AND Krt6a <= 0 AND Gc <= 0 AND Cd79b > 409 AND Epcam <= 1 AND Anxa8 <= 0 AND C1qc <= 0 AND P2ry13 <= 0 AND Trem2 <= 0 AND Dmkn <= 0 AND Hpgds <= 13 AND C1qb <= 0…	Spleen
Rule200	Ptprcap > 3 AND Cd3e <= 1 AND Fxyd3 <= 1 AND Fcrls <= 6 AND Tmem119 > 9 AND Fosl1 <= 4 AND Ttr <= 0 AND Hpgds <= 1 AND Lgals7 <= 6 AND Ptprc > 2 AND C1qc <= 0	Marrow
Rule201	Ptprcap > 3 AND Cd3e <= 1 AND Fxyd3 <= 1 AND Tmem119 <= 7 AND Fcrls > 8 AND Cd79b > 146 AND Cx3cr1 <= 0	Muscle
Rule202	Ptprcap > 3 AND Cd3e <= 1 AND Fxyd3 <= 1 AND Tmem119 <= 7 AND Fcrls > 8 AND Cd79b <= 300 AND Lpcat2 <= 5 AND Cela2a <= 0	Fat
Rule203	Ptprcap > 3 AND Cd3e <= 1 AND Fxyd3 <= 1 AND Fcrls <= 6 AND Tmem119 <= 23 AND Pnlip <= 0 AND Cd79b > 100 AND Prss2 <= 0 AND Cela2a <= 0 AND Tcf7 <= 2 AND Epcam <= 23 AND Ins2 <= 4 AND Resp18 <= 0 AND Krt13 <= 0 AND Ccr9 <= 0 AND Chga <= 0 AND Krt6a <= 0 AND Gc <= 0 AND Cd79b > 409 AND Epcam <= 1 AND Anxa8 <= 0 AND C1qc <= 0 AND P2ry13 <= 0 AND Trem2 <= 0 AND Dmkn <= 0 AND C1qb <= 0 AND Lypd3 <= 0…	Marrow
Rule204	Ptprcap > 3 AND Cd3e <= 1 AND Fxyd3 <= 1 AND Fcrls <= 6 AND Tmem119 <= 23 AND Pnlip <= 0 AND Cd79b > 100 AND Prss2 <= 0 AND Cela2a <= 0 AND Tcf7 <= 2 AND Epcam <= 23 AND Ins2 <= 4 AND Resp18 <= 0 AND Krt13 <= 0 AND Ccr9 <= 0 AND Chga <= 0 AND Krt6a <= 0 AND Gc <= 0 AND Cd79b > 409 AND Epcam <= 1 AND Anxa8 <= 0 AND C1qc <= 0 AND P2ry13 <= 0 AND Trem2 <= 0 AND Dmkn <= 0 AND Myb <= 1 AND Hpgds <= 13…	Spleen
Rule205	Ptprcap > 3 AND Cd3e <= 1 AND Fxyd3 <= 1 AND Fcrls <= 6 AND Tmem119 <= 23 AND Pnlip <= 0 AND Cd79b > 100 AND Prss2 <= 0 AND Cela2a <= 0 AND Tcf7 <= 2 AND Epcam <= 23 AND Ins2 <= 4 AND Resp18 <= 0 AND Krt13 <= 0 AND Ccr9 <= 0 AND Chga <= 0 AND Krt6a <= 0 AND Gc <= 0 AND Cd79b > 409 AND Epcam <= 1 AND Anxa8 <= 0 AND C1qc <= 0 AND P2ry13 <= 0 AND Trem2 <= 0 AND Dmkn <= 0 AND Hpgds <= 13 AND C1qb <= …	Spleen
Rule206	Ptprcap > 3 AND Cd3e > 1 AND Fosl1 > 1 AND Trim29 <= 28 AND Rac2 <= 448 AND C1qa <= 0 AND Trem2 <= 0	Trachea
Rule207	Ptprcap > 3 AND Cd3e > 1 AND Lpcat2 <= 5 AND Perp <= 5 AND Cela2a > 0 AND Hpgds <= 20 AND Cdh1 > 0	Trachea
Rule208	Ptprcap > 3 AND Cd3e > 1 AND Lpcat2 <= 5 AND Perp <= 5 AND Pnlip > 0 AND Fosl1 <= 3 AND Rac2 > 1383 AND Sycn <= 0 AND Csf1r <= 0 AND Cd8a <= 599	Lung
Rule209	Ptprcap > 3 AND Cd3e > 1 AND Lpcat2 <= 5 AND Perp <= 5 AND Cela2a > 0 AND Cldn3 <= 4 AND Hpgds <= 20 AND Epcam > 6	Lung
Rule210	Ptprcap > 3 AND Cd3e > 1 AND Lpcat2 <= 5 AND Perp <= 5 AND Cela2a > 0 AND Cldn3 <= 4 AND Hpgds <= 20 AND Tmem119 <= 4 AND Ptprc > 1652 AND Tm4sf4 <= 0	Lung
Rule211	Ptprcap > 3 AND Cd3e > 1 AND Lpcat2 <= 5 AND Perp <= 5 AND Cela2a > 0 AND Hpgds <= 20 AND Cldn3 <= 4 AND Tmem119 <= 4 AND Siglech <= 0 AND Tcf7 <= 175 AND Krt19 <= 0	Fat
Rule212	Ptprcap > 3 AND Cd3e > 1 AND Lpcat2 <= 5 AND Perp <= 5 AND Tcf7 > 48 AND Krt13 > 0 AND Krt8 <= 0 AND Cd8a > 762	Thymus
Rule213	Ptprcap > 3 AND Cd3e > 1 AND Krt13 > 0 AND Chga <= 0 AND Klk1 <= 0 AND Clca2 <= 0 AND Krt8 <= 0 AND Gpr34 > 0 AND Anxa8 <= 0	Thymus
Rule214	Ptprcap > 3 AND Cd3e > 1 AND Krt13 > 0 AND Chga <= 0 AND Clca2 <= 0 AND Klk1 <= 0 AND Krt8 <= 0 AND Epcam <= 577 AND Lgals4 <= 29 AND Pax9 <= 0 AND Laptm5 > 322 AND Krt14 > 0	Fat
Rule215	Ptprcap > 3 AND Cd3e > 1 AND Lpcat2 <= 5 AND Perp <= 5 AND Tcf7 > 48 AND Prss2 > 0 AND Col17a1 <= 0 AND Epcam <= 23 AND Aqp3 <= 70 AND Tspan8 <= 0 AND C1qa <= 0 AND Lgmn <= 0 AND Prss2 <= 20 AND Guca2a <= 0 AND Dmbt1 <= 0 AND Tcf7 > 387	Thymus
Rule216	Ptprcap > 3 AND Cd3e > 1 AND Lpcat2 <= 5 AND Perp <= 5 AND Tcf7 > 48 AND Prss2 > 0 AND Col17a1 <= 0 AND C1qa <= 0 AND Cd8a > 366	Thymus
Rule217	Ptprcap > 3 AND Cd3e > 1 AND Lpcat2 <= 5 AND Perp <= 5 AND Tcf7 > 48 AND Prss2 > 0 AND Col17a1 <= 0 AND C1qa > 0	Thymus
Rule218	Ptprcap > 3 AND Cd3e > 1 AND Prss2 > 0 AND Dsp <= 0 AND Lpcat2 <= 22 AND Col17a1 <= 0 AND Epcam <= 241 AND Clps <= 0 AND C1qb <= 0 AND Fxyd3 <= 0 AND Scgn <= 0 AND Ptprcap > 52 AND Klk1 <= 0 AND Prss2 <= 620 AND Try5 <= 0 AND Ctsd > 23	Lung
Rule219	Ptprcap > 3 AND Cd3e > 1 AND Lpcat2 <= 5 AND Perp <= 5 AND Tcf7 > 48 AND Ccr9 > 0 AND Sfn <= 73 AND Gpr34 <= 387 AND Laptm5 <= 5474 AND Hpgds > 34 AND Mbp <= 4	Spleen
Rule220	Ptprcap > 3 AND Cd3e > 1 AND Lpcat2 <= 5 AND Perp <= 5 AND Tcf7 > 48 AND Ccr9 > 0 AND Sfn <= 73 AND Gpr34 > 387	Lung
Rule221	Ptprcap > 3 AND Cd3e > 1 AND Lpcat2 <= 5 AND Perp <= 5 AND Tcf7 > 48 AND Ccr9 > 0 AND Sfn > 73	Lung
Rule222	Ptprcap > 3 AND Cd3e > 1 AND Lpcat2 <= 5 AND Perp <= 5 AND Tcf7 > 48 AND Ccr9 > 0 AND Laptm5 <= 5474 AND Ins2 <= 0 AND Chga > 1 AND Laptm5 <= 159	Spleen
Rule223	Ptprcap > 3 AND Cd3e > 1 AND Lpcat2 <= 5 AND Perp <= 5 AND Tcf7 > 48 AND Ccr9 > 0 AND Laptm5 <= 5474 AND Resp18 > 0 AND Ccr9 > 32	Thymus
Rule224	Ptprcap > 3 AND Cd3e > 1 AND Lpcat2 <= 5 AND Perp <= 5 AND Tcf7 > 48 AND Chga <= 0 AND C1qa > 2 AND Ttr <= 0 AND Gc <= 0 AND Cd3d > 153 AND Coro1a <= 4291	Thymus
Rule225	Ptprcap > 3 AND Cd3e > 1 AND Lpcat2 <= 3 AND Tmem27 <= 0 AND Krt13 > 0 AND Chga <= 0 AND Ccr9 <= 21 AND Myb <= 14 AND Laptm5 <= 649	Muscle
Rule226	Ptprcap > 3 AND Cd3e > 1 AND Lpcat2 <= 3 AND Tmem27 <= 0 AND Perp > 5 AND 2210415F13Rik <= 0 AND Clps <= 0 AND Ccr9 > 309 AND S100a14 <= 25	Thymus
Rule227	Ptprcap > 3 AND Cd3e > 1 AND Perp <= 5 AND Lpcat2 <= 3 AND Tcf7 > 48 AND Chga <= 0 AND Ccr9 > 0 AND Laptm5 <= 5474 AND Cldn3 > 4 AND Krt8 <= 8	Trachea
Rule228	Ptprcap > 3 AND Cd3e > 1 AND Perp <= 5 AND Lpcat2 <= 3 AND Crybb1 <= 0 AND Tcf7 > 52 AND Chga <= 0 AND Laptm5 <= 5311 AND Ccr9 > 0 AND Perp > 1 AND Ptprcap <= 533	Trachea
Rule229	Ptprcap > 3 AND Cd3e > 1 AND Perp <= 5 AND Lpcat2 <= 3 AND Crybb1 <= 0 AND Tcf7 > 52 AND Chga <= 0 AND Laptm5 <= 5311 AND Ccr9 > 0 AND Try4 > 0 AND Col17a1 <= 9	Thymus
Rule230	Ptprcap > 3 AND Cd3e > 1 AND Perp <= 5 AND Lpcat2 <= 3 AND Crybb1 <= 0 AND Tcf7 > 52 AND Chga <= 0 AND Ccr9 > 0 AND Laptm5 <= 5474 AND Col17a1 <= 12 AND Ins2 <= 0 AND Tcf7 <= 1075 AND 2210415F13Rik <= 0 AND Cd3g > 1025 AND Lgals4 <= 1 AND Mbp <= 69	Thymus
Rule231	Ptprcap > 3 AND Cd3e <= 1 AND Fxyd3 <= 1 AND Fcrls <= 6 AND Tmem119 <= 23 AND Pnlip <= 0 AND Cd79b > 100 AND Prss2 <= 0 AND Cela2a <= 0 AND Tcf7 <= 2 AND Epcam <= 23 AND Ins2 <= 4 AND Resp18 <= 0 AND Krt13 <= 0 AND Ccr9 <= 0 AND Chga <= 0 AND Krt6a <= 0 AND Gc <= 0 AND Cd79b > 409 AND Klk1 > 0 AND C1qc <= 0 AND Guca2a <= 1 AND Dsp <= 0 AND Sycn <= 0 AND Klk1 <= 2 AND Lgals4 <= 0 AND Klk1 <= 1 AND…	Marrow
Rule232	Ptprcap > 3 AND Cd3e <= 1 AND Fxyd3 <= 1 AND Fcrls <= 6 AND Tmem119 <= 23 AND Pnlip <= 0 AND Cd79b > 100 AND Prss2 <= 0 AND Cela2a <= 0 AND Tcf7 <= 2 AND Epcam <= 23 AND Ins2 <= 4 AND Resp18 <= 0 AND Krt13 <= 0 AND Ccr9 <= 0 AND Chga <= 0 AND Krt6a <= 0 AND Gc <= 0 AND Cd79b > 409 AND Epcam <= 1 AND Anxa8 <= 0 AND C1qc <= 0 AND P2ry13 <= 0 AND Trem2 <= 0 AND Dmkn <= 0 AND Hpgds <= 13 AND C1qb <= …	Spleen
Rule233	Ptprcap > 3 AND Cd3e <= 1 AND Fxyd3 <= 1 AND Fcrls <= 6 AND Tmem119 <= 23 AND Pnlip <= 0 AND Cd79b > 100 AND Prss2 <= 0 AND Cela2a <= 0 AND Tcf7 <= 2 AND Epcam <= 23 AND Ins2 <= 4 AND Resp18 <= 0 AND Krt13 <= 0 AND Ccr9 <= 0 AND Chga <= 0 AND Krt6a <= 0 AND Gc <= 0 AND Cd79b > 409 AND Epcam <= 1 AND Anxa8 <= 0 AND C1qc <= 0 AND P2ry13 <= 0 AND Trem2 <= 0 AND Dmkn <= 0 AND Hpgds <= 13 AND C1qb <= …	Spleen
Rule234	Ptprcap > 3 AND Cd3e <= 1 AND Fxyd3 <= 1 AND Fcrls <= 6 AND Tmem119 <= 23 AND Pnlip <= 0 AND Cd79b > 100 AND Prss2 <= 0 AND Cela2a <= 0 AND Tcf7 <= 2 AND Epcam <= 23 AND Ins2 <= 4 AND Resp18 <= 0 AND Krt13 <= 0 AND Ccr9 <= 0 AND Chga <= 0 AND Krt6a <= 0 AND Gc <= 0 AND Cd79b > 409 AND Epcam <= 1 AND Anxa8 <= 0 AND Cldn7 > 0 AND Csf1r <= 0 AND Lgals4 <= 1 AND Crybb1 <= 5 AND Dmkn <= 0 AND Perp <= …	Spleen
Rule235	Ptprcap > 3 AND Cd3e <= 1 AND Fxyd3 <= 1 AND Fcrls <= 6 AND Tmem119 <= 23 AND Pnlip > 0 AND Dsp <= 0 AND Tmem119 <= 4 AND Lypd3 <= 0 AND Cd3g <= 61 AND Gpr34 > 7	Thymus
Rule236	Ptprcap > 3 AND Cd3e <= 1 AND Fxyd3 <= 1 AND Fcrls <= 6 AND Tmem119 <= 23 AND Cela2a <= 0 AND Cd79b > 100 AND Pnlip <= 0 AND Tcf7 <= 2 AND Epcam <= 7 AND Ins2 <= 4 AND Resp18 <= 0 AND Krt13 <= 0 AND Ccr9 <= 0 AND Trim29 <= 0 AND Mobp <= 1 AND Krt5 <= 1 AND Epcam <= 2 AND Lypd3 <= 0 AND Chga <= 0 AND Cx3cr1 <= 1 AND Gc <= 0 AND C1qc <= 1 AND Fosl1 <= 0 AND Cd79b > 1060 AND Cd8a <= 0 AND Pigr > 2 A…	Spleen
Rule237	Ptprcap > 3 AND Cd3e <= 1 AND Fxyd3 <= 1 AND Fcrls <= 6 AND Tmem119 <= 23 AND Cela2a <= 0 AND Cd79b > 100 AND Pnlip <= 0 AND Tcf7 <= 2 AND Epcam <= 7 AND Ins2 <= 4 AND Resp18 <= 0 AND Krt13 <= 0 AND Ccr9 <= 0 AND Trim29 <= 0 AND Mobp <= 1 AND Krt5 <= 1 AND Epcam <= 2 AND Lypd3 <= 0 AND Chga <= 0 AND Cx3cr1 <= 1 AND Gc <= 0 AND C1qc <= 1 AND Fosl1 <= 0 AND Cd79b > 1060 AND Cd8a <= 0 AND Krt5 <= 0 …	Spleen
Rule238	Ptprcap > 3 AND Cd3e <= 1 AND Fxyd3 <= 1 AND Fcrls <= 6 AND Tmem119 <= 23 AND Cela2a <= 0 AND Cd79b > 100 AND Pnlip <= 0 AND Tcf7 <= 2 AND Epcam <= 7 AND Ins2 <= 4 AND Resp18 <= 0 AND Krt13 <= 0 AND Ccr9 <= 0 AND Trim29 <= 0 AND Chga <= 0 AND Cx3cr1 <= 1 AND Krt5 <= 1 AND Epcam <= 2 AND Lypd3 <= 0 AND Gc <= 0 AND C1qc <= 1 AND Fosl1 <= 0 AND Mobp <= 1 AND Cldn7 > 0 AND Cx3cr1 <= 0 AND P2ry12 <= 1…	Marrow
Rule239	Ptprcap > 3 AND Cd3e <= 1 AND Fxyd3 <= 1 AND Fcrls <= 6 AND Tmem119 <= 23 AND Cela2a <= 0 AND Cd79b > 100 AND Pnlip <= 0 AND Tcf7 <= 2 AND Epcam <= 7 AND Ins2 <= 4 AND Resp18 <= 0 AND Krt13 <= 0 AND Ccr9 <= 0 AND Trim29 <= 0 AND Chga <= 0 AND Cx3cr1 <= 1 AND Epcam <= 2 AND Krt5 <= 1 AND Fosl1 <= 0 AND Lypd3 <= 0 AND Gc <= 0 AND C1qc <= 1 AND Mobp <= 1 AND Cd79b > 1060 AND Cd8a <= 0 AND Krt5 <= 0 …	Spleen
Rule240	Ptprcap > 3 AND Cd3e <= 1 AND Fxyd3 <= 1 AND Fcrls <= 6 AND Tmem119 <= 23 AND Cela2a <= 0 AND Cd79b > 100 AND Pnlip <= 0 AND Tcf7 <= 2 AND Epcam <= 7 AND Ins2 <= 4 AND Resp18 <= 0 AND Krt13 <= 0 AND Ccr9 <= 0 AND Trim29 <= 0 AND Chga <= 0 AND Cx3cr1 <= 1 AND Krt5 <= 1 AND Epcam <= 2 AND Lypd3 <= 0 AND Gc <= 0 AND C1qc <= 1 AND Fosl1 <= 0 AND Mobp <= 1 AND Cd79b > 1060 AND Cd8a <= 0 AND Krt5 <= 0 …	Marrow
Rule241	Ptprcap > 3 AND Cd3e <= 1 AND Fxyd3 <= 1 AND Fcrls <= 6 AND Tmem119 <= 23 AND Cela2a <= 0 AND Cd79b > 100 AND Pnlip <= 0 AND Tcf7 <= 2 AND Epcam <= 7 AND Ins2 <= 4 AND Resp18 <= 0 AND Krt13 <= 0 AND Ccr9 <= 0 AND Trim29 <= 0 AND Chga <= 0 AND Cx3cr1 <= 1 AND Epcam <= 2 AND Krt5 <= 1 AND Fosl1 <= 0 AND Lypd3 <= 0 AND Gc <= 0 AND C1qc <= 1 AND Mobp <= 1 AND Cd79b > 1060 AND Cd8a <= 0 AND Krt5 <= 0 …	Spleen
Rule242	Ptprcap > 3 AND Cd3e <= 1 AND Fxyd3 <= 1 AND Fcrls <= 6 AND Tmem119 <= 23 AND Cela2a <= 0 AND Cd79b > 100 AND Pnlip <= 0 AND Tcf7 <= 2 AND Epcam <= 7 AND Ins2 <= 4 AND Resp18 <= 0 AND Krt13 <= 0 AND Ccr9 <= 0 AND Trim29 <= 0 AND Chga <= 0 AND Krt5 <= 1 AND Epcam <= 2 AND Lypd3 <= 0 AND Cx3cr1 <= 1 AND Gc <= 0 AND C1qc <= 1 AND Fosl1 <= 0 AND Mobp <= 1 AND Cd79b > 1060 AND Cd8a <= 0 AND Krt5 <= 0 …	Spleen
Rule243	Ptprcap > 3 AND Cd3e > 1 AND Perp <= 5 AND 2610528A11Rik > 0 AND Gc <= 0 AND P2ry12 <= 0 AND Resp18 <= 0	Spleen
Rule244	Ptprcap > 3 AND Cd3e > 1 AND 2610528A11Rik > 0 AND Gc > 0	Kidney
Rule245	Ptprcap > 3 AND Cd3e > 1 AND Perp <= 5 AND Lpcat2 <= 2 AND Crybb1 <= 0 AND Tcf7 > 53 AND Coro1a <= 0 AND Lgmn > 46	Kidney
Rule246	Ptprcap > 3 AND Cd3e > 1 AND Perp <= 5 AND Lpcat2 <= 2 AND Crybb1 <= 0 AND Tcf7 > 41 AND Laptm5 <= 5058 AND Resp18 > 0 AND Ccr9 > 0 AND Cd8b1 <= 321	Lung
Rule247	Ptprcap > 3 AND Cd3e > 1 AND Perp <= 5 AND Lpcat2 <= 2 AND Crybb1 <= 0 AND Tcf7 > 41 AND Laptm5 <= 5058 AND Ins2 <= 0 AND Tspan8 <= 1 AND Fosl1 <= 0 AND Cd79b <= 343 AND Dmkn <= 0 AND Mobp <= 0 AND Ccr9 > 0 AND Col17a1 <= 0 AND Myb <= 224 AND Aqp3 > 43 AND Ptprcap <= 820	Spleen
Rule248	Ptprcap > 3 AND Cd3e > 1 AND Perp <= 5 AND Lpcat2 <= 2 AND Crybb1 <= 0 AND Tcf7 > 53 AND Laptm5 <= 5058 AND Fosl1 <= 0 AND Ins2 <= 0 AND Tspan8 > 1 AND Lgals7 > 0	Spleen
Rule249	Ptprcap > 3 AND Cd3e > 1 AND Perp <= 5 AND Lpcat2 <= 2 AND Crybb1 <= 0 AND Tcf7 > 41 AND Laptm5 <= 5058 AND Ins2 <= 0 AND Fosl1 <= 0 AND Cd79b <= 343 AND Tspan8 <= 0 AND Mobp <= 0 AND Krt6a <= 0 AND Ccr9 > 0 AND Col17a1 <= 0 AND Tcf7 <= 1075 AND Guca2a <= 0 AND Lgals7 <= 0 AND Hexb > 428 AND Tmem119 <= 1 AND Ccr9 > 12	Spleen
Rule250	Ptprcap > 3 AND Cd3e > 1 AND Perp <= 5 AND Lpcat2 <= 2 AND Crybb1 <= 0 AND Tcf7 > 41 AND Laptm5 <= 5058 AND Ins2 <= 0 AND Tspan8 <= 0 AND Ccr9 > 0 AND Col17a1 <= 12 AND Myb <= 224 AND Dmkn > 0 AND Ccr9 > 97	Thymus
Rule251	Ptprcap > 3 AND Cd3e > 1 AND Perp <= 5 AND Lpcat2 <= 2 AND C1qb > 9 AND Fcrls > 17 AND Gpr34 > 22	Trachea
Rule252	Ptprcap > 3 AND Cd3e > 1 AND Perp <= 5 AND Lpcat2 <= 2 AND Tcf7 > 41 AND Laptm5 <= 5058 AND Ins2 <= 0 AND Tspan8 <= 0 AND Ccr9 > 0 AND Col17a1 <= 10 AND Myb <= 224 AND Krt8 > 1 AND Cldn7 <= 0 AND Ccr9 > 19	Spleen
Rule253	Ptprcap > 3 AND Cd3e > 1 AND Perp <= 5 AND Lpcat2 <= 2 AND Tcf7 > 41 AND Laptm5 <= 5058 AND Ins2 <= 0 AND Ccr9 > 0 AND Col17a1 <= 10 AND Tcf7 <= 1075 AND Krt6a > 0 AND Hexb <= 2	Thymus
Rule254	Ptprcap > 3 AND Cd3e > 1 AND Perp <= 5 AND Lpcat2 <= 2 AND Tcf7 > 41 AND Laptm5 <= 5058 AND Ins2 <= 0 AND Krt6a <= 0 AND Fosl1 <= 0 AND Dmkn <= 0 AND Ccr9 > 0 AND Col17a1 > 10 AND Try4 <= 0	Spleen
Rule255	Ptprcap > 3 AND Cd3e > 1 AND Perp <= 5 AND Lpcat2 <= 2 AND Tcf7 > 41 AND Laptm5 <= 5058 AND Cd79b <= 343 AND Fosl1 <= 0 AND Krt6a <= 0 AND Ctrb1 > 0 AND Rnase1 <= 0 AND Cd3e <= 193 AND Ins2 <= 5 AND Cx3cr1 <= 0 AND Mbp <= 62	Thymus
Rule256	Ptprcap > 3 AND Cd3e > 1 AND Perp <= 5 AND Lpcat2 <= 2 AND Tcf7 > 41 AND Laptm5 <= 5058 AND Ins2 <= 0 AND Tspan8 <= 0 AND Ccr9 > 0 AND Col17a1 <= 0 AND Myb <= 224 AND Lgals7 <= 0 AND Tcf7 <= 1075 AND 2210415F13Rik <= 0 AND Slc2a5 > 0 AND Coro1a > 2665	Spleen
Rule257	Ptprcap > 3 AND Cd3e > 1 AND Perp <= 5 AND Lpcat2 <= 2 AND Tcf7 > 41 AND Laptm5 <= 5058 AND Ins2 <= 0 AND Tspan8 <= 0 AND Ccr9 > 0 AND Col17a1 <= 0 AND Myb <= 223 AND Lgals7 <= 0 AND Tmem119 <= 1 AND Tcf7 <= 1075 AND 2210415F13Rik <= 0 AND Cd79b <= 222 AND Trem2 > 0 AND Ccr9 > 88	Thymus
Rule258	Ptprcap > 3 AND Cd3e > 1 AND Perp <= 5 AND Lpcat2 <= 2 AND Tcf7 > 52 AND Laptm5 <= 5058 AND Fosl1 <= 2 AND Ins2 <= 0 AND Tspan8 <= 0 AND Ccr9 > 0 AND Col17a1 <= 0 AND Myb <= 223 AND Lgals7 <= 0 AND Tmem119 <= 1 AND Tcf7 <= 1075 AND 2210415F13Rik <= 0 AND Csf1r > 0 AND Lpcat2 <= 0	Thymus
Rule259	Ptprcap > 3 AND Cd3e <= 1 AND Fxyd3 <= 1 AND Fcrls <= 6 AND Tmem119 <= 23 AND Cela2a <= 0 AND Cd79b > 100 AND Pnlip <= 0 AND Tcf7 <= 2 AND Epcam <= 7 AND Ins2 <= 4 AND Resp18 <= 0 AND Krt13 <= 0 AND Ccr9 <= 0 AND Trim29 <= 0 AND Chga <= 0 AND Krt5 <= 1 AND Epcam <= 2 AND Lypd3 <= 0 AND Cx3cr1 <= 1 AND Gc <= 0 AND C1qc <= 1 AND Fosl1 <= 0 AND Mobp <= 1 AND Cd79b > 1060 AND Cd8a <= 0 AND Krt5 <= 0 …	Marrow
Rule260	Ptprcap > 3 AND Cd3e > 1 AND Perp <= 5 AND Lpcat2 <= 2 AND Tcf7 > 52 AND Fosl1 <= 2 AND Laptm5 <= 5058 AND Ins2 <= 0 AND Tspan8 <= 0 AND Sfn > 54 AND Tspan1 <= 191 AND C1qb <= 0 AND Cd79b <= 284 AND Cd3e > 36	Spleen
Rule261	Ptprcap > 3 AND Cd3e <= 1 AND Fxyd3 <= 1 AND Fcrls <= 6 AND Tmem119 <= 23 AND Cela2a <= 0 AND Cd79b > 100 AND Pnlip <= 0 AND Tcf7 <= 2 AND Epcam <= 7 AND Ins2 <= 4 AND Resp18 <= 0 AND Krt13 <= 0 AND Ccr9 <= 0 AND Trim29 <= 0 AND Chga <= 0 AND Krt5 <= 1 AND Epcam <= 2 AND Lypd3 <= 0 AND Cx3cr1 <= 1 AND Gc <= 0 AND C1qc <= 1 AND Fosl1 <= 0 AND Mobp <= 1 AND Cd79b > 1060 AND Cd8a <= 0 AND Krt5 <= 0 …	Spleen
Rule262	Ptprcap > 3 AND Cd3e <= 1 AND Fxyd3 <= 1 AND Fcrls <= 5 AND Tmem119 <= 23 AND Cela2a <= 0 AND Cd79b > 100 AND Pnlip <= 0 AND Tcf7 <= 2 AND Epcam <= 7 AND Ins2 <= 4 AND Resp18 <= 0 AND Krt13 <= 0 AND Ccr9 <= 0 AND Trim29 <= 0 AND Chga <= 0 AND Krt5 <= 1 AND Lypd3 <= 0 AND Epcam <= 2 AND Cx3cr1 <= 1 AND Gc <= 0 AND C1qc <= 1 AND Fosl1 <= 0 AND Mobp <= 1 AND Cd79b > 1060 AND Cd8a <= 0 AND Krt5 <= 0 …	Fat
Rule263	Ptprcap > 3 AND Cd3e <= 1 AND Fxyd3 <= 1 AND Fcrls <= 5 AND Tmem119 <= 23 AND Cela2a <= 0 AND Cd79b > 100 AND Pnlip <= 0 AND Tcf7 <= 2 AND Epcam <= 7 AND Ins2 <= 4 AND Resp18 <= 0 AND Krt13 <= 0 AND Ccr9 <= 0 AND Trim29 <= 0 AND Chga <= 0 AND Krt5 <= 1 AND Epcam <= 2 AND Lypd3 <= 0 AND Cx3cr1 <= 1 AND Gc <= 0 AND C1qc <= 1 AND Fosl1 <= 0 AND Mobp <= 1 AND Cd79b > 1060 AND Cd8a <= 0 AND Krt5 <= 0 …	Spleen
Rule264	Ptprcap > 3 AND Cd3e > 1 AND Perp <= 5 AND Lpcat2 <= 2 AND Tcf7 > 52 AND Fosl1 <= 2 AND Laptm5 <= 5058 AND Ins2 <= 0 AND Sfn <= 52 AND Tspan8 <= 0 AND Krt6a <= 0 AND Mobp <= 0 AND Csf1r <= 6 AND Cd3g > 451 AND Oit1 > 0 AND 2210415F13Rik <= 0	Spleen
Rule265	Ptprcap > 3 AND Cd3e <= 1 AND Fxyd3 <= 1 AND Fcrls <= 5 AND Tmem119 <= 23 AND Pnlip > 0 AND Dsp <= 0 AND Pigr <= 20 AND Cd3g <= 61 AND Lgmn <= 94 AND Pax9 <= 0 AND Cdh1 <= 0 AND Myb > 0	Marrow
Rule266	Ptprcap > 3 AND Cd3e <= 1 AND Fxyd3 <= 1 AND Fcrls <= 5 AND Tmem119 <= 23 AND Pnlip <= 0 AND Cd79b > 100 AND Prss2 <= 0 AND Cela2a <= 0 AND Tcf7 <= 2 AND Epcam <= 23 AND Ins2 <= 4 AND Resp18 <= 0 AND Krt13 <= 0 AND Ccr9 <= 0 AND Chga <= 0 AND Krt6a <= 0 AND Gc <= 0 AND Cd79b > 409 AND Epcam <= 1 AND Anxa8 <= 0 AND Dmkn <= 0 AND C1qc <= 0 AND P2ry13 <= 0 AND Gpr34 <= 0 AND Cd8a <= 0 AND Hpgds <= 1…	Spleen
Rule267	Ptprcap > 3 AND Cd3e > 1 AND Perp <= 5 AND Lpcat2 <= 2 AND Tcf7 > 41 AND Fosl1 > 2 AND Myb <= 159 AND Krt14 <= 0 AND Epcam <= 4 AND Hexb <= 1	Fat
Rule268	Ptprcap > 3 AND Cd3e > 1 AND Perp <= 5 AND Lpcat2 <= 2 AND Tcf7 > 52 AND Laptm5 <= 5058 AND Ins2 <= 0 AND Sfn <= 52 AND Tspan8 <= 0 AND Cd3g > 454 AND Krt6a <= 0 AND Dmkn <= 0 AND Fosl1 <= 0 AND Sycn <= 0 AND Phgr1 <= 0 AND B4galnt2 <= 0 AND 2210415F13Rik > 0 AND Ccr9 <= 25 AND Slc2a5 <= 0 AND Cd3e <= 287	Spleen
Rule269	Ptprcap > 3 AND Cd3e > 1 AND Perp <= 5 AND Lpcat2 <= 2 AND Tcf7 > 52 AND Laptm5 <= 5058 AND Cd79b <= 343 AND Chga <= 0 AND Ccr9 > 0 AND Col17a1 <= 3 AND Slc2a5 > 0	Thymus
Rule270	Ptprcap > 3 AND Cd3e > 1 AND Perp <= 5 AND Lpcat2 <= 2 AND Tcf7 > 52 AND Laptm5 <= 5058 AND Cd79b <= 343 AND Chga <= 0 AND Ccr9 > 0 AND Col17a1 <= 3 AND Mbp <= 1179 AND Ctrb1 > 0 AND Ptprcap <= 743	Lung
Rule271	Ptprcap > 3 AND Cd3e > 1 AND Perp <= 5 AND Lpcat2 <= 2 AND Tcf7 > 52 AND Laptm5 <= 5058 AND Cd79b <= 343 AND Chga <= 0 AND Ccr9 > 0 AND Col17a1 <= 3 AND Trem2 > 0 AND Hexb > 0	Thymus
Rule272	Ptprcap > 3 AND Cd3e > 1 AND Perp <= 5 AND Lpcat2 <= 2 AND Tcf7 > 52 AND Laptm5 <= 5058 AND Cd79b <= 343 AND Chga <= 0 AND Krt6a <= 0 AND C1qa <= 1 AND Fosl1 <= 0 AND Ccr9 > 0 AND Col17a1 > 0 AND Hexb <= 7	Thymus
Rule273	Ptprcap > 3 AND Cd3e > 1 AND Perp <= 5 AND Lpcat2 <= 2 AND Tcf7 > 52 AND Laptm5 <= 5058 AND Cd79b <= 343 AND Chga <= 0 AND Krt6a <= 0 AND C1qa <= 1 AND Fosl1 <= 0 AND Ccr9 > 0 AND Ins2 > 0 AND B4galnt2 <= 41 AND Scgn <= 0 AND Gpr34 <= 0 AND Cpa1 <= 0 AND Pnlip <= 0 AND Tspan8 <= 0 AND Krt19 <= 1 AND P2ry12 <= 0 AND Tmem119 <= 0 AND Coro1a <= 6712 AND Ttr <= 0 AND Klk1 <= 0 AND Lpcat2 <= 0 AND C1q…	Thymus
Rule274	Ptprcap > 3 AND Cd3e <= 1 AND Fxyd3 <= 1 AND Fcrls <= 5 AND Tmem119 <= 23 AND Pnlip <= 0 AND Cd79b > 100 AND Prss2 <= 0 AND Cela2a <= 0 AND Tcf7 <= 2 AND Epcam <= 23 AND Ins2 <= 4 AND Resp18 <= 0 AND Krt13 <= 0 AND Ccr9 <= 0 AND Chga <= 0 AND Krt6a <= 0 AND Gc <= 0 AND Cd79b > 409 AND Epcam <= 1 AND Anxa8 <= 0 AND Dmkn <= 0 AND C1qc <= 0 AND Trim29 <= 0 AND P2ry13 <= 0 AND Gpr34 <= 0 AND Cd8a <= …	Marrow
Rule275	Ptprcap > 3 AND Cd3e <= 1 AND Fxyd3 <= 1 AND Fcrls <= 5 AND Tmem119 <= 23 AND Pnlip <= 0 AND Cd79b > 100 AND Prss2 <= 0 AND Cela2a <= 0 AND Tcf7 <= 2 AND Epcam <= 23 AND Ins2 <= 4 AND Resp18 <= 0 AND Krt13 <= 0 AND Ccr9 <= 0 AND Chga <= 0 AND Krt6a <= 0 AND Gc <= 0 AND Cd79b > 409 AND Epcam <= 1 AND Anxa8 <= 0 AND Dmkn <= 0 AND C1qc <= 0 AND Trim29 <= 0 AND P2ry13 <= 0 AND Gpr34 <= 0 AND Cd8a <= …	Spleen
Rule276	Ptprcap > 3 AND Cd3e > 1 AND Perp <= 5 AND Lpcat2 <= 2 AND Tcf7 > 52 AND Laptm5 <= 5058 AND Chga <= 0 AND Cd79b <= 343 AND Krt6a <= 0 AND C1qa <= 1 AND Csf1r > 3 AND Hexb <= 1	Spleen
Rule277	Ptprcap > 3 AND Cd3e > 1 AND Perp <= 5 AND Lpcat2 <= 2 AND Tcf7 > 52 AND Laptm5 <= 5058 AND Chga <= 0 AND Cd79b <= 343 AND Krt6a <= 0 AND C1qa <= 1 AND Fosl1 <= 0 AND Mobp <= 0 AND Cd3g > 453 AND Asb5 > 1 AND Krt17 <= 0	Trachea
Rule278	Ptprcap > 3 AND Cd3e > 1 AND Perp <= 5 AND Lpcat2 <= 2 AND Tcf7 > 52 AND Laptm5 <= 5058 AND Chga <= 0 AND Cd79b <= 343 AND Krt6a <= 0 AND C1qa <= 1 AND Fosl1 <= 0 AND Mobp <= 0 AND Ccr9 > 0 AND Ins2 <= 0 AND Tcf7 <= 1075 AND Tmem119 <= 1 AND Lgals7 <= 0 AND Csf1r > 0 AND Siglech <= 0	Thymus
Rule279	Ptprcap > 3 AND Cd3e > 1 AND Perp <= 5 AND Lpcat2 <= 2 AND Tcf7 > 52 AND Laptm5 <= 5058 AND Chga <= 0 AND Cd79b <= 343 AND Krt6a <= 0 AND C1qa <= 1 AND Fosl1 <= 0 AND Mobp <= 0 AND Tspan8 <= 0 AND Ccr9 > 0 AND Ins2 <= 0 AND Csf1r <= 0 AND Tcf7 <= 1075 AND Lgals7 <= 0 AND Guca2a <= 0 AND Krt5 > 0	Thymus
Rule280	Ptprcap > 3 AND Cd3e > 1 AND Perp <= 5 AND Lpcat2 <= 2 AND Tcf7 > 41 AND Laptm5 <= 5058 AND Cd79b <= 343 AND Chga <= 0 AND Csf1r > 3 AND Sfn <= 0 AND C1qa <= 1 AND Ctsd > 298	Marrow
Rule281	Ptprcap > 3 AND Cd3e > 1 AND Perp <= 5 AND Lpcat2 <= 2 AND Tcf7 > 41 AND Laptm5 <= 5058 AND Cd79b <= 343 AND Chga <= 0 AND Krt6a <= 0 AND Mobp <= 0 AND Foxf1a <= 0 AND Cd3g > 453 AND Tspan8 <= 0 AND Myb > 233 AND Ctsd <= 23	Thymus
Rule282	Ptprcap > 3 AND Cd3e > 1 AND Perp <= 5 AND Lpcat2 <= 2 AND Tcf7 > 41 AND Laptm5 <= 5058 AND Cd79b <= 343 AND Ins2 <= 0 AND Krt6a <= 0 AND Tspan8 <= 0 AND Myb <= 274 AND Mobp <= 0 AND Cd3g > 451 AND Sycn <= 0 AND Sfn > 55	Fat
Rule283	Ptprcap > 3 AND Cd3e > 1 AND Perp <= 5 AND Lpcat2 <= 2 AND Tcf7 > 41 AND Laptm5 <= 5058 AND Cd79b <= 343 AND Krt6a <= 0 AND Mobp <= 0 AND Resp18 > 0 AND Dmbt1 <= 0 AND Hpgds <= 3 AND Siglech <= 0 AND Myb <= 1 AND C1qc <= 1	Fat
Rule284	Ptprcap > 3 AND Cd3e > 1 AND Perp <= 5 AND Lpcat2 <= 2 AND Tcf7 > 41 AND Laptm5 <= 5058 AND Cd79b <= 343 AND Krt6a <= 0 AND Mobp <= 0 AND Chga <= 0 AND Fosl1 <= 0 AND Cd3g > 453 AND Myb <= 278 AND Foxf1a <= 0 AND Tspan8 <= 0 AND Phgr1 <= 0 AND Ptprc <= 2122 AND Sfn <= 28 AND Dmkn <= 0 AND Aqp3 <= 99 AND Trem2 > 0 AND Trem2 <= 1	Thymus
Rule285	Ptprcap > 3 AND Cd3e > 1 AND Perp <= 5 AND Lpcat2 <= 2 AND C1qb > 9 AND Hpgds <= 0 AND Fcrls <= 17 AND Asb5 <= 0	Liver
Rule286	Ptprcap > 3 AND Cd3e > 1 AND Perp <= 5 AND Lpcat2 <= 2 AND Tcf7 > 52 AND Laptm5 <= 5058 AND Chga <= 0 AND Fosl1 <= 0 AND Krt6a <= 0 AND Cd79b <= 343 AND Mobp <= 0 AND Cd3g > 453 AND Myb <= 278 AND Tspan8 <= 0 AND Phgr1 > 0	Spleen
Rule287	Ptprcap > 3 AND Cd3e > 1 AND Perp <= 5 AND Lpcat2 <= 2 AND Tcf7 > 52 AND Laptm5 <= 5058 AND Chga <= 0 AND Krt6a <= 0 AND Fosl1 <= 0 AND Cd79b <= 343 AND Mobp <= 0 AND Cd3g > 453 AND Myb > 278	Trachea
Rule288	Ptprcap > 3 AND Cd3e > 1 AND Perp <= 5 AND Lpcat2 <= 2 AND Tcf7 > 52 AND Laptm5 <= 5058 AND Chga <= 0 AND Fosl1 <= 0 AND Krt6a <= 0 AND Cd79b <= 343 AND Mobp <= 0 AND Csf1r <= 1 AND Ins2 > 1 AND Calm4 <= 1 AND Gc <= 1 AND Ctrb1 > 0 AND Ptprcap > 614	Fat
Rule289	Ptprcap > 3 AND Cd3e > 1 AND Perp <= 5 AND Lpcat2 <= 2 AND Tcf7 > 52 AND Laptm5 <= 5058 AND Chga <= 0 AND Fosl1 <= 0 AND Krt6a <= 0 AND Cd79b <= 343 AND Mobp <= 0 AND Cd3g > 453 AND Tspan8 <= 0 AND Ptprc <= 2122 AND Coro1a > 562 AND Dmkn <= 0 AND Dmbt1 > 0 AND Lgals7 > 0	Spleen
Rule290	Ptprcap > 3 AND Cd3e > 1 AND Perp <= 5 AND Lpcat2 <= 2 AND Tcf7 > 52 AND Laptm5 <= 5058 AND Chga <= 0 AND Fosl1 <= 0 AND Krt6a <= 0 AND Cd79b <= 343 AND Mobp <= 0 AND Csf1r <= 1 AND Cd3g > 453 AND Foxf1a > 0 AND Hexb > 0	Thymus
Rule291	Ptprcap > 3 AND Cd3e > 1 AND Perp <= 5 AND Lpcat2 <= 2 AND Tcf7 > 52 AND Laptm5 <= 5058 AND Chga <= 0 AND Fosl1 <= 0 AND Krt6a <= 0 AND Cd79b <= 343 AND Mobp <= 0 AND Csf1r <= 1 AND Cd3g > 453 AND Tspan8 <= 0 AND Ptprc <= 2122 AND Guca2a <= 0 AND Sfn <= 28 AND Coro1a > 562 AND Gc <= 0 AND Ttr > 0 AND Fcrls <= 0	Thymus
Rule292	Ptprcap > 3 AND Cd3e > 1 AND Perp <= 5 AND Lpcat2 <= 2 AND Tcf7 > 52 AND Laptm5 <= 5058 AND Chga <= 0 AND Fosl1 <= 0 AND Krt6a <= 0 AND Cd79b <= 343 AND Mobp <= 0 AND Cd3g > 477 AND Tspan8 <= 0 AND Ptprc <= 2122 AND Sfn <= 28 AND Aqp3 <= 47 AND Gc <= 0 AND Ins2 > 0 AND Tcf7 > 152 AND Krt8 <= 0 AND Cd3e > 68	Thymus
Rule293	Ptprcap > 3 AND Cd3e > 1 AND Perp <= 5 AND Lpcat2 <= 2 AND Tcf7 > 52 AND Laptm5 <= 5058 AND Krt6a <= 0 AND Chga <= 0 AND Fosl1 <= 0 AND Cd79b <= 343 AND Mobp <= 0 AND Ccr9 > 0 AND Ins2 <= 0 AND Csf1r <= 0 AND Tcf7 <= 1044 AND Lgals7 <= 0 AND Guca2a <= 0 AND 2210415F13Rik <= 0 AND Try5 <= 0 AND Lgmn > 0 AND Ctsd <= 1052	Thymus
Rule294	Ptprcap > 3 AND Cd3d > 59 AND Tmem27 > 1 AND Cx3cr1 <= 0	Kidney
Rule295	Ptprcap > 3 AND Cd3d > 59 AND Perp <= 5 AND Lpcat2 <= 2 AND Krt6a > 0 AND Myb <= 21 AND 2210415F13Rik <= 0 AND Cd79b <= 340 AND Ccr9 <= 28 AND Cd3g <= 653 AND Perp <= 0 AND Fcrls <= 0 AND Krt13 <= 0 AND Ctsd <= 617	Muscle
Rule296	Ptprcap > 3 AND Cd3d > 59 AND Perp <= 5 AND Lpcat2 <= 2 AND Ins2 <= 0 AND Gc <= 0 AND Chga <= 1 AND Cd3g > 483 AND Cdh17 > 0 AND Hexb <= 1 AND Epcam <= 0	Liver
Rule297	Ptprcap > 3 AND Cd3d > 59 AND Perp <= 5 AND Lpcat2 <= 2 AND Ins2 <= 0 AND Gc <= 0 AND Chga <= 1 AND Cd3g > 483 AND Krt19 > 14	Lung
Rule298	Ptprcap > 3 AND Cd3d > 59 AND Perp <= 5 AND Lpcat2 <= 2 AND Ins2 <= 0 AND Gc <= 0 AND Chga <= 1 AND Cd3g > 483 AND Csf1r > 2 AND C1qc <= 0	Lung
Rule299	Ptprcap > 3 AND Cd3d > 59 AND Perp <= 5 AND Lpcat2 <= 2 AND Ins2 <= 0 AND Gc <= 0 AND Chga <= 1 AND Col17a1 <= 0 AND Cd3g > 483 AND Pigr > 0 AND Aqp3 <= 0	Spleen
Rule300	Ptprcap > 3 AND Cd3d > 59 AND Perp <= 5 AND Lpcat2 <= 2 AND Ins2 <= 0 AND Gc <= 0 AND Chga <= 1 AND Col17a1 <= 0 AND Cd3g > 483 AND 2210415F13Rik > 0 AND Lgmn <= 16 AND Krt8 > 0	Spleen
Rule301	Ptprcap > 3 AND Cd3d > 59 AND Perp <= 5 AND Lpcat2 <= 2 AND Ins2 <= 0 AND Gc <= 0 AND Chga <= 1 AND Col17a1 <= 0 AND Cd3g > 483 AND 2210415F13Rik > 0 AND Lgmn <= 16	Marrow
Rule302	Ptprcap > 3 AND Cd3d > 59 AND Perp <= 5 AND Lpcat2 <= 2 AND Ins2 <= 0 AND Gc <= 0 AND Chga <= 1 AND Cd3g > 483 AND Tspan8 <= 0 AND Klk1 <= 0 AND Dmkn <= 0 AND Guca2a > 0 AND Krt8 > 0	Spleen
Rule303	Ptprcap > 3 AND Cd3d > 59 AND Perp <= 5 AND Lpcat2 <= 2 AND Ins2 <= 0 AND Gc <= 0 AND Chga <= 1 AND Cd3g > 483 AND Tspan8 <= 0 AND Klk1 <= 0 AND Ckmt1 <= 0 AND Gpr34 <= 10 AND Dmkn <= 0 AND Krt15 <= 1 AND Ptprc <= 1200 AND Gpx2 <= 0 AND Perp > 0 AND Cldn7 > 0	Thymus
Rule304	Ptprcap > 3 AND Cd3d > 59 AND Lpcat2 <= 2 AND Perp > 5 AND Klk1 <= 1 AND Krt14 <= 1 AND Ptprcap <= 378	Trachea
Rule305	Ptprcap > 3 AND Cd3d > 59 AND Lpcat2 <= 2 AND Ins2 <= 0 AND Gc <= 0 AND Chga <= 1 AND Col17a1 <= 0 AND Cd3g > 483 AND Klk1 <= 0 AND Tspan8 <= 0 AND Ckmt1 <= 0 AND Gpr34 <= 10 AND Krt15 <= 1 AND Perp > 0 AND Krt8 <= 1 AND Gpr34 <= 0 AND Ctsd > 3	Fat
Rule306	Ptprcap > 3 AND Cd3d > 59 AND Lpcat2 <= 2 AND Ins2 <= 0 AND Gc <= 0 AND Chga <= 1 AND Col17a1 <= 0 AND Cd3g > 483 AND Klk1 <= 0 AND Tspan8 <= 0 AND Ckmt1 <= 0 AND Gpr34 <= 10 AND Krt15 <= 1 AND Ptprc <= 1200 AND Krt5 <= 0 AND Gpx2 <= 0 AND Serpinb5 <= 0 AND Coro1a > 728 AND Hpgds <= 0 AND Cd8b1 <= 313 AND Mobp <= 0 AND Krt6a <= 0 AND Anxa8 <= 0 AND Krt19 > 1 AND Krt8 <= 0	Spleen
Rule307	Ptprcap > 3 AND Cd3d > 59 AND Lpcat2 <= 2 AND Ins2 <= 0 AND Gc <= 0 AND Chga <= 1 AND Col17a1 <= 0 AND Cd3g > 483 AND Klk1 <= 0 AND Tspan8 <= 0 AND Ckmt1 <= 0 AND Foxf1a <= 0 AND Gpr34 <= 10 AND Krt15 <= 1 AND Ptprc <= 1200 AND Krt5 <= 0 AND Serpinb5 <= 0 AND Coro1a > 728 AND Cd8b1 <= 313 AND Mobp <= 0 AND Cx3cr1 <= 83 AND Cd79b <= 12 AND Hpgds <= 0 AND Krt6a <= 0 AND Trem2 <= 0 AND Anxa8 <= 0 AN…	Thymus
Rule308	Lgals7 > 29 AND Cd3g <= 46 AND Foxf1a > 119 AND S100a14 > 0	Bladder
Rule309	Lgals7 > 29 AND Cd3g <= 46 AND Pax9 > 2 AND Tfap2b <= 1 AND Krt19 <= 308 AND Cd8a <= 70	Tongue
Rule310	Ptprcap > 3 AND Cd3g <= 1 AND Fxyd3 <= 1 AND Cd3e > 82 AND Hexb <= 325 AND Cd79b <= 37 AND P2ry12 > 0 AND Gpr34 <= 0	Thymus
Rule311	Ptprcap > 3 AND Cd3g <= 1 AND Fxyd3 <= 1 AND Fcrls <= 5 AND Tmem119 <= 23 AND Cd8a <= 2 AND Fosl1 > 1 AND Dsc3 <= 0 AND P2ry12 <= 111 AND Foxf1a <= 0 AND Gpr34 <= 146 AND Tm4sf4 <= 0 AND Coro1a > 545 AND C1qb <= 0	Marrow
Rule312	Ptprcap > 3 AND Cd3g <= 1 AND Fxyd3 <= 1 AND Fcrls <= 5 AND Tmem119 <= 23 AND Fosl1 <= 1 AND Cd8a <= 1 AND Pnlip <= 0 AND Myb > 1 AND Scgn <= 0 AND Tcf7 <= 77 AND Gpr34 <= 127 AND Pax9 > 6	Spleen
Rule313	Ptprcap > 3 AND Cd3g <= 1 AND Fxyd3 <= 1 AND Fcrls <= 5 AND Tmem119 <= 23 AND Fosl1 <= 1 AND Cd8a <= 1 AND Pnlip <= 0 AND Myb > 1 AND Scgn <= 0 AND Tcf7 <= 77 AND Gpr34 <= 127 AND Crybb1 <= 15 AND Siglech > 2730 AND C1qb <= 0	Marrow
Rule314	Ptprcap > 3 AND Cd3g <= 1 AND Fxyd3 <= 1 AND Fcrls <= 5 AND Tmem119 <= 23 AND Fosl1 <= 1 AND Cd8a <= 1 AND Pnlip <= 0 AND Myb > 1 AND Siglech <= 2730 AND Epcam <= 160 AND Scgn <= 0 AND Tcf7 <= 77 AND Tm4sf4 <= 0 AND Crybb1 <= 15 AND Clps <= 0 AND Cd79b <= 1464 AND Ckmt1 <= 0 AND Cx3cr1 <= 22 AND Ctrl <= 28 AND Ptprc <= 1263 AND 2210415F13Rik <= 2 AND C1qb <= 1	Marrow
Rule315	Ptprcap > 3 AND Cd3g <= 1 AND Fxyd3 <= 1 AND Fcrls <= 5 AND Tmem119 <= 23 AND Fosl1 <= 1 AND Cd8a <= 1 AND Cela3b <= 0 AND Pnlip <= 0 AND Cela2a <= 0 AND Gpx2 <= 0 AND Epcam <= 5 AND Csf1r <= 133 AND Cd79b > 238 AND Tcf7 <= 2 AND Gc <= 0 AND Ins2 <= 5 AND Trim29 <= 0 AND Krt6a <= 0 AND Resp18 <= 0 AND Krt13 <= 0 AND C1qc <= 1 AND Epcam <= 1 AND Dmkn <= 0 AND Chga <= 0 AND Cx3cr1 <= 1 AND Krt14 <=…	Marrow
Rule316	Ptprcap > 3 AND Cd3g <= 1 AND Fxyd3 <= 1 AND Fcrls <= 5 AND Tmem119 <= 23 AND Fosl1 <= 1 AND Cd8a <= 1 AND Cela3b <= 0 AND Pnlip <= 0 AND Cela2a <= 0 AND Gpx2 <= 0 AND Epcam <= 5 AND Csf1r <= 133 AND Cd79b > 238 AND Tcf7 <= 2 AND Gc <= 0 AND Ins2 <= 5 AND Trim29 <= 0 AND Krt6a <= 0 AND Resp18 <= 0 AND Krt13 <= 0 AND C1qc <= 1 AND Epcam <= 1 AND Dmkn <= 0 AND Chga <= 0 AND Cx3cr1 <= 1 AND Krt14 <=…	Spleen
Rule317	Ptprcap > 3 AND Cd3g <= 1 AND Fxyd3 <= 1 AND Fcrls <= 5 AND Tmem119 <= 23 AND Fosl1 <= 1 AND Cd8a <= 1 AND Cela3b <= 0 AND Pnlip <= 0 AND Cela2a <= 0 AND Gpx2 <= 0 AND Epcam <= 5 AND Csf1r <= 133 AND Cd79b > 238 AND Tcf7 <= 2 AND Gc <= 0 AND Ins2 <= 5 AND Trim29 <= 0 AND Krt6a <= 0 AND Resp18 <= 0 AND Krt13 <= 0 AND C1qc <= 1 AND Epcam <= 1 AND Dmkn <= 0 AND Chga <= 0 AND Cx3cr1 <= 1 AND Krt14 <=…	Spleen
Rule318	Ptprcap > 3 AND Cd3g <= 1 AND Fxyd3 <= 1 AND Fcrls <= 5 AND Tmem119 <= 23 AND Fosl1 <= 1 AND Cd8a <= 1 AND Cela3b <= 0 AND Pnlip <= 0 AND Cela2a <= 0 AND Cdx1 > 0 AND P2ry12 <= 2 AND Lgmn <= 0 AND Try4 <= 0 AND Perp > 0	Marrow
Rule319	Ptprcap > 3 AND Cd3g <= 1 AND Fxyd3 <= 1 AND Fcrls <= 5 AND Tmem119 <= 23 AND Fosl1 <= 1 AND Cd8a <= 1 AND Cela3b <= 0 AND Pnlip <= 0 AND Cela2a <= 0 AND Gpx2 <= 0 AND Epcam <= 5 AND Csf1r <= 133 AND Cd79b > 238 AND Tcf7 <= 2 AND Gc <= 0 AND Ins2 <= 5 AND Trim29 <= 0 AND Krt13 <= 0 AND Resp18 <= 0 AND Krt6a <= 0 AND C1qc <= 1 AND Epcam <= 1 AND Dmkn <= 0 AND Chga <= 0 AND Cx3cr1 <= 1 AND Krt14 <=…	Marrow
Rule320	Ptprcap > 3 AND Cd3g <= 1 AND Fxyd3 <= 1 AND Fcrls <= 5 AND Tmem119 <= 23 AND Fosl1 <= 1 AND Cd8a <= 1 AND Cela3b <= 0 AND Pnlip <= 0 AND Cela2a <= 0 AND Gpx2 <= 0 AND Epcam <= 5 AND Csf1r <= 133 AND Cd79b > 238 AND Tcf7 <= 2 AND Gc <= 0 AND Ins2 <= 5 AND Trim29 <= 0 AND Krt13 <= 0 AND Resp18 <= 0 AND Krt6a <= 0 AND C1qc <= 1 AND Epcam <= 1 AND Dmkn <= 0 AND Klk1 > 0 AND 2210415F13Rik <= 0 AND Ra…	Spleen
Rule321	Ptprcap > 3 AND Cd3g <= 1 AND Fxyd3 <= 1 AND Fcrls <= 5 AND Tmem119 <= 23 AND Fosl1 <= 1 AND P2ry12 <= 3 AND Pnlip <= 0 AND Cd8b1 <= 1 AND Prss2 <= 0 AND Cela2a <= 0 AND Epcam <= 5 AND Cd79b > 236 AND Tcf7 <= 2 AND Ccr9 > 2 AND Mobp <= 0 AND Hpgds <= 2 AND Krt8 <= 1	Lung
Rule322	Ptprcap > 3 AND Cd3g <= 1 AND Fxyd3 <= 1 AND Fcrls <= 5 AND Tmem119 <= 23 AND Fosl1 <= 1 AND P2ry12 <= 3 AND Pnlip <= 0 AND Prss2 <= 0 AND Cd8b1 <= 1 AND Cela2a <= 0 AND Epcam <= 5 AND Trem2 > 1 AND Tcf7 <= 0 AND P2ry13 <= 0 AND Ccr9 <= 20 AND Lgmn <= 184 AND Cldn7 <= 0 AND Lpcat2 > 3	Lung
Rule323	Ptprcap > 3 AND Cd3g <= 1 AND Fxyd3 <= 1 AND Fcrls <= 5 AND Tmem119 <= 23 AND Fosl1 <= 1 AND P2ry12 <= 3 AND Pnlip <= 0 AND Prss2 <= 0 AND Cd8b1 <= 1 AND Cela2a <= 0 AND Epcam <= 5 AND Cd79b > 236 AND Tcf7 <= 2 AND Gc <= 0 AND Calm4 <= 0 AND Ins2 <= 6 AND Resp18 > 0 AND Lpcat2 <= 0 AND C1qc <= 0 AND Krt8 <= 0	Fat
Rule324	Ptprcap > 3 AND Cd3g <= 1 AND Fxyd3 <= 1 AND Fcrls <= 5 AND Tmem119 <= 23 AND Fosl1 <= 1 AND P2ry12 <= 3 AND Pnlip <= 0 AND Prss2 <= 0 AND Cd8b1 <= 1 AND Cela2a <= 0 AND Epcam <= 5 AND Cd79b > 236 AND Tcf7 <= 2 AND Gc <= 0 AND Calm4 <= 0 AND Ins2 <= 6 AND Klk1 <= 0 AND Krt13 <= 0 AND Trim29 <= 0 AND C1qc <= 1 AND Epcam <= 1 AND Lypd3 <= 0 AND Krt6a <= 0 AND Anxa8 <= 0 AND Dmkn <= 0 AND Ttr <= 0 A…	Spleen
Rule325	Ptprcap > 3 AND Cd3g <= 1 AND Fxyd3 <= 1 AND Fcrls <= 5 AND Tmem119 <= 23 AND Fosl1 <= 1 AND P2ry12 <= 3 AND Pnlip <= 0 AND Prss2 <= 0 AND Cd8b1 <= 1 AND Cela2a <= 0 AND Epcam <= 5 AND Cd79b > 236 AND Tcf7 <= 2 AND Calm4 <= 0 AND Gc <= 0 AND Ins2 <= 6 AND Klk1 <= 0 AND Krt13 <= 0 AND Trim29 <= 0 AND C1qc <= 1 AND Epcam <= 1 AND Lypd3 <= 0 AND Krt5 <= 1 AND Chga <= 0 AND Cx3cr1 <= 1 AND Mobp <= 1 …	Marrow
Rule326	Ptprcap > 8 AND Cd3g <= 1 AND Krt19 <= 2 AND Fcrls <= 5 AND Pnlip <= 0 AND Cd8a <= 4 AND Col17a1 > 1 AND Coro1a > 1812	Spleen
Rule327	Ptprcap > 3 AND Cd3g <= 1 AND Fxyd3 > 1 AND Them5 <= 1 AND Klk1 <= 0 AND Dsc3 <= 37 AND Krt8 > 0	Mammary
Rule328	Ptprcap > 3 AND Cd3g <= 1 AND Col17a1 > 1 AND Ptprcap <= 68 AND Ptprc > 26	Trachea
Rule329	Ptprcap > 8 AND Cd3g <= 1 AND Tmem119 <= 5 AND Pnlip <= 0 AND Cd8a <= 3 AND Cela2a <= 0 AND Epcam <= 5 AND Fosl1 <= 0 AND Pigr > 2 AND Ins2 > 0 AND Coro1a > 250 AND Rac2 <= 1369	Liver
Rule330	Ptprcap > 8 AND Cd3g <= 1 AND Tmem119 <= 5 AND Pnlip <= 0 AND Cd8a <= 3 AND Cela2a <= 0 AND Epcam <= 4 AND Fosl1 <= 0 AND Cd79b > 236 AND Tcf7 <= 2 AND Ins2 <= 6 AND Cd8b1 <= 0 AND Klk1 > 0 AND Klk1 <= 16 AND Guca2a <= 0 AND Prss2 <= 0 AND Resp18 <= 0 AND Coro1a <= 4545 AND Dsp <= 0 AND P2ry13 <= 0 AND P2ry12 <= 0 AND Lpcat2 <= 16 AND Krt14 <= 0 AND Ctsd > 0	Marrow
Rule331	Ptprcap > 8 AND Cd3g <= 1 AND Tmem119 <= 5 AND Pnlip <= 0 AND Cd8a <= 3 AND Cela2a <= 0 AND Epcam <= 4 AND Fosl1 <= 0 AND Cd79b > 236 AND Tcf7 <= 2 AND Ins2 <= 6 AND Cd8b1 <= 0 AND Trim29 <= 0 AND Klk1 <= 0 AND Krt5 <= 1 AND Lypd3 <= 0 AND C1qc <= 1 AND Gc <= 0 AND Krt13 <= 0 AND Krt14 <= 0 AND Cd8a <= 0 AND Krt15 <= 2 AND Mobp <= 1 AND Dmbt1 <= 0 AND Chga <= 0 AND Cx3cr1 <= 1 AND Epcam <= 1 AND …	Spleen
Rule332	Ptprcap > 8 AND Cd3g <= 1 AND Tmem119 <= 5 AND Pnlip <= 0 AND Cd8a <= 3 AND Cela2a <= 0 AND Epcam <= 4 AND Fosl1 <= 0 AND Cd79b > 236 AND Tcf7 <= 2 AND Ins2 <= 6 AND Cd8b1 <= 0 AND Trim29 <= 0 AND Klk1 <= 0 AND Krt5 <= 1 AND Lypd3 <= 0 AND C1qc <= 1 AND Gc <= 0 AND Krt13 <= 0 AND Krt14 <= 0 AND Cd8a <= 0 AND Krt15 <= 2 AND Mobp <= 1 AND Dmbt1 <= 0 AND Chga <= 0 AND Cx3cr1 <= 1 AND Epcam <= 1 AND …	Spleen
Rule333	Ptprcap > 8 AND Cd3g <= 1 AND Tmem119 <= 5 AND Pnlip <= 0 AND Cd8a <= 3 AND Cela2a <= 0 AND Epcam <= 4 AND Fosl1 <= 0 AND Cd79b > 236 AND Tcf7 <= 2 AND Ins2 <= 6 AND Cd8b1 <= 0 AND Trim29 <= 0 AND Klk1 <= 0 AND Krt5 <= 1 AND Lypd3 <= 0 AND C1qc <= 1 AND Gc <= 0 AND Krt13 <= 0 AND Krt14 <= 0 AND Cd8a <= 0 AND Krt15 <= 2 AND Mobp <= 1 AND Chga <= 0 AND Cx3cr1 <= 1 AND Epcam <= 1 AND Ttr <= 0 AND Cd…	Spleen
Rule334	Ptprcap > 8 AND Cd3g <= 1 AND Tmem119 <= 5 AND Pnlip <= 0 AND Cd8a <= 3 AND Cela2a <= 0 AND Epcam <= 4 AND Fosl1 <= 0 AND Cd79b > 236 AND Tcf7 <= 2 AND Ins2 <= 6 AND Cd8b1 <= 0 AND Trim29 <= 0 AND Klk1 <= 0 AND Krt5 <= 1 AND Lypd3 <= 0 AND C1qc <= 1 AND Gc <= 0 AND Krt13 <= 0 AND Krt14 <= 0 AND Cd8a <= 0 AND Krt15 <= 2 AND Mobp <= 1 AND Chga <= 0 AND Cx3cr1 <= 1 AND Epcam <= 1 AND Ttr <= 0 AND Cd…	Marrow
Rule335	Ptprcap > 8 AND Cd3g <= 1 AND Tmem119 <= 5 AND Pnlip <= 0 AND Cd8a <= 3 AND Cela2a <= 0 AND Epcam <= 4 AND Fosl1 <= 0 AND Cd79b > 236 AND Tcf7 <= 2 AND Ins2 <= 6 AND Cd8b1 <= 0 AND Trim29 <= 0 AND Klk1 <= 0 AND Krt5 <= 1 AND Lypd3 <= 0 AND C1qc <= 1 AND Gc <= 0 AND Krt13 <= 0 AND Krt14 <= 0 AND Cd8a <= 0 AND Krt15 <= 2 AND Mobp <= 1 AND Chga <= 0 AND Cx3cr1 <= 1 AND Epcam <= 1 AND Ttr <= 0 AND Cd…	Spleen
Rule336	Ptprcap > 8 AND Cd3g <= 1 AND Tmem119 <= 5 AND Pnlip <= 0 AND Cd8a <= 3 AND Cela2a <= 0 AND Epcam <= 4 AND Fosl1 <= 0 AND Cd79b > 236 AND Tcf7 <= 2 AND Ins2 <= 6 AND Cd8b1 <= 0 AND Trim29 <= 0 AND Klk1 <= 0 AND Krt5 <= 1 AND Lypd3 <= 0 AND C1qc <= 1 AND Gc <= 0 AND Krt13 <= 0 AND Krt14 <= 0 AND Dmbt1 > 0 AND Sfn <= 6 AND Pigr <= 0	Marrow
Rule337	Ptprcap > 8 AND Cd3g <= 1 AND Tmem119 <= 5 AND Pnlip <= 0 AND Cd8a <= 3 AND Cela2a <= 0 AND Epcam <= 4 AND Fosl1 <= 0 AND Cd79b > 236 AND Tcf7 <= 2 AND Ins2 <= 6 AND Cd8b1 <= 0 AND Trim29 <= 0 AND Klk1 <= 0 AND Krt5 <= 1 AND Lypd3 <= 0 AND C1qc <= 1 AND Gc <= 0 AND Krt13 <= 0 AND Krt14 <= 0 AND Cd8a <= 0 AND Krt15 <= 2 AND Mobp <= 1 AND Chga <= 0 AND Cx3cr1 <= 1 AND Epcam <= 1 AND Ttr <= 0 AND Cd…	Spleen
Rule338	Ptprcap > 8 AND Cd3g <= 1 AND Tmem119 <= 5 AND Pnlip <= 0 AND Cd8a <= 3 AND Cela2a <= 0 AND Epcam <= 4 AND Fosl1 <= 0 AND Cd79b > 236 AND Tcf7 <= 2 AND Ins2 <= 6 AND Cd8b1 <= 0 AND Trim29 <= 0 AND Klk1 <= 0 AND Krt5 <= 1 AND Lypd3 <= 0 AND C1qc <= 1 AND Gc <= 0 AND Krt13 <= 0 AND Krt14 <= 0 AND Cd8a <= 0 AND Krt15 <= 2 AND Mobp <= 1 AND Chga <= 0 AND Cx3cr1 <= 1 AND Epcam <= 1 AND Ttr <= 0 AND Kr…	Spleen
Rule339	Ptprcap > 3 AND Cd3g <= 1 AND Tmem119 <= 7 AND Cd8a <= 2 AND Pnlip > 0 AND Dsp <= 0 AND C1qa <= 0 AND Dmkn <= 9 AND Lgmn <= 94 AND Pigr <= 9 AND Cx3cr1 > 0	Lung
Rule340	Ptprcap > 3 AND Cd3g <= 1 AND Tmem119 <= 7 AND Cd8a <= 2 AND Ctrb1 > 0 AND Krt6a <= 0 AND Ccr9 <= 0 AND Pigr <= 12 AND Cd79b > 2074 AND Ins2 <= 5	Marrow
Rule341	Ptprcap > 3 AND Cd3g <= 1 AND Tmem119 <= 7 AND Ctrb1 > 0 AND Krt6a <= 0 AND Ccr9 <= 0 AND C1qb <= 2 AND Mbp <= 2 AND Krt15 > 0 AND C1qa <= 0 AND Cela3b <= 0 AND Hexb <= 32	Fat
Rule342	Ptprcap > 3 AND Cd3g <= 1 AND Tmem119 <= 7 AND Cd8a <= 2 AND Ctrb1 > 0 AND Krt6a <= 0 AND Ccr9 <= 0 AND Mbp <= 2 AND Krt15 > 0 AND C1qa <= 0	Lung
Rule343	Ptprcap > 3 AND Cd3g <= 1 AND Tmem119 <= 7 AND Cd8a <= 2 AND Pnlip <= 0 AND Fosl1 <= 0 AND Cela2a <= 0 AND Cdh1 <= 0 AND Gpr34 <= 28 AND Lpcat2 <= 138 AND Epcam <= 3 AND Cdhr5 <= 0 AND Cd79b > 270 AND Tcf7 <= 2 AND Calm4 <= 0 AND Cd8b1 <= 0 AND Ins2 <= 6 AND Klk1 <= 0 AND Trim29 <= 0 AND Gc <= 0 AND C1qa <= 2 AND C1qc <= 1 AND Krt13 <= 0 AND Krt6a <= 0 AND Krt14 <= 0 AND Krt15 <= 2 AND Cd8a <= 0 …	Spleen
Rule344	Ptprcap > 3 AND Cd3g <= 1 AND Tmem119 <= 7 AND Cd8a <= 2 AND Pnlip <= 0 AND Fosl1 <= 0 AND Cela2a <= 0 AND Cdh1 <= 0 AND Gpr34 <= 28 AND Lpcat2 <= 138 AND Epcam <= 3 AND Cdhr5 <= 0 AND Cd79b > 270 AND Tcf7 <= 2 AND Calm4 <= 0 AND Cd8b1 <= 0 AND Ins2 <= 6 AND Klk1 <= 0 AND Trim29 <= 0 AND Gc <= 0 AND C1qa <= 2 AND C1qc <= 1 AND Krt13 <= 0 AND Krt6a <= 0 AND Anxa8 <= 0 AND Cd8a <= 0 AND Cd79b > 114…	Marrow
Rule345	Ptprcap > 3 AND Cd3g <= 1 AND Tmem119 <= 7 AND Cd8a <= 2 AND Pnlip <= 0 AND Fosl1 <= 0 AND Cela2a <= 0 AND Cdh1 <= 0 AND Gpr34 <= 28 AND Lpcat2 <= 138 AND Epcam <= 3 AND Cdhr5 <= 0 AND Cd79b > 270 AND Tcf7 <= 2 AND Calm4 <= 0 AND Cd8b1 <= 0 AND Ins2 <= 6 AND Klk1 <= 0 AND Trim29 <= 0 AND Gc <= 0 AND C1qa <= 2 AND Mobp > 1 AND Trem2 <= 1 AND Lpcat2 <= 0 AND Ptprcap > 205	Spleen
Rule346	Ptprcap > 3 AND Cd3g <= 1 AND Tmem119 <= 7 AND Cd8a <= 2 AND Pnlip <= 0 AND Fosl1 <= 0 AND Cela2a <= 0 AND Cdh1 <= 0 AND Gpr34 <= 28 AND Lpcat2 <= 138 AND Epcam <= 3 AND Cdhr5 <= 0 AND Cd79b > 270 AND Tcf7 <= 2 AND Calm4 <= 0 AND Mobp <= 1 AND Cd8b1 <= 0 AND Klk1 <= 0 AND Ins2 <= 6 AND Gc <= 0 AND C1qa <= 2 AND C1qc > 2 AND Hexb <= 0 AND Sfn <= 43	Liver
Rule347	Ptprcap > 3 AND Cd3g <= 1 AND Tmem119 <= 7 AND Cd8a <= 2 AND Pnlip <= 0 AND Fosl1 <= 0 AND Cela2a <= 0 AND Cdh1 <= 0 AND Gpr34 <= 28 AND Mbp <= 426 AND Epcam <= 3 AND Cd79b > 174 AND Tcf7 <= 1 AND Mobp <= 1 AND Ins2 <= 6 AND Krt13 <= 0 AND Cd8b1 <= 0 AND Trim29 <= 0 AND Klk1 <= 0 AND Gc <= 0 AND C1qa <= 1 AND Krt6a <= 0 AND Anxa8 <= 0 AND Cd79b > 1149 AND Tmem27 <= 0 AND Krt15 <= 3 AND Cd8a <= 0 …	Spleen
Rule348	Ptprcap > 3 AND Cd3g <= 1 AND Tmem119 <= 7 AND Cd8a <= 2 AND Pnlip <= 0 AND Fosl1 <= 0 AND Cela2a <= 0 AND Cdh1 <= 0 AND Gpr34 <= 28 AND Mbp <= 426 AND Epcam <= 3 AND Cd79b > 174 AND Tcf7 <= 1 AND Mobp <= 1 AND Ins2 <= 6 AND Krt13 <= 0 AND Cd8b1 <= 0 AND Trim29 <= 0 AND Klk1 <= 0 AND Gc <= 0 AND C1qa <= 1 AND Krt6a <= 0 AND Anxa8 <= 0 AND Cd79b > 1149 AND Tmem27 <= 0 AND Cd8a <= 0 AND Krt15 <= 3 …	Marrow
Rule349	Ptprcap > 3 AND Cd3g <= 1 AND Tmem119 <= 7 AND Cd8a <= 2 AND Pnlip <= 0 AND Fosl1 <= 0 AND Cela2a <= 0 AND Cdh1 <= 0 AND Gpr34 <= 28 AND Mbp <= 426 AND Epcam <= 3 AND Cd79b > 174 AND Tcf7 <= 1 AND Mobp <= 1 AND Ins2 <= 6 AND Krt13 <= 0 AND Cd8b1 <= 0 AND Trim29 <= 0 AND Klk1 <= 0 AND Gc <= 0 AND C1qa <= 1 AND Krt6a <= 0 AND Anxa8 <= 0 AND Cd79b > 1149 AND Tmem27 <= 0 AND Cd8a <= 0 AND Krt15 <= 3 …	Spleen
Rule350	Ptprcap > 3 AND Cd3g <= 1 AND Tmem119 <= 7 AND Cd8a <= 2 AND Pnlip <= 0 AND Fosl1 <= 0 AND Dmbt1 <= 0 AND Cela2a <= 0 AND Cdh1 <= 0 AND Gpr34 <= 28 AND Epcam <= 3 AND Lpcat2 <= 138 AND Sycn > 0 AND Ptprcap > 10 AND Siglech <= 0 AND Slc2a5 <= 0 AND Klk1 <= 0 AND Sfn <= 5 AND B4galnt2 <= 0 AND Lgmn <= 255 AND Lgals4 <= 0	Marrow
Rule351	Ptprcap > 3 AND Cd3g <= 1 AND Tmem119 <= 7 AND Cd8a <= 2 AND Pnlip <= 0 AND Fosl1 <= 0 AND Cela2a <= 0 AND Cdh1 <= 0 AND Gpr34 <= 28 AND Mbp <= 426 AND Epcam <= 3 AND Cd79b > 174 AND Tcf7 <= 1 AND Mobp <= 1 AND Ins2 <= 6 AND Krt13 <= 0 AND Cd8b1 <= 0 AND Trim29 <= 0 AND Klk1 <= 0 AND Gc <= 0 AND C1qa <= 1 AND Krt6a <= 0 AND Anxa8 <= 0 AND Tmem119 <= 1 AND Cd8a <= 0 AND Cd79b > 1149 AND Krt15 <= 3…	Spleen
Rule352	Ptprcap > 3 AND Cd3g <= 1 AND Tmem119 <= 7 AND Cd8a <= 2 AND Pnlip <= 0 AND Fosl1 <= 0 AND Cela2a <= 0 AND Cdh1 <= 0 AND Gpr34 <= 28 AND Mbp <= 426 AND Epcam <= 3 AND Cd79b > 174 AND Tcf7 <= 1 AND Mobp <= 1 AND Ins2 <= 6 AND Krt13 <= 0 AND Cd8b1 <= 0 AND Trim29 <= 0 AND Klk1 <= 0 AND Gc <= 0 AND C1qa <= 1 AND Krt6a <= 0 AND Anxa8 <= 0 AND Tmem119 <= 1 AND Cd8a <= 0 AND Cd79b > 1149 AND Krt15 <= 3…	Spleen
Rule353	Ptprcap > 3 AND Cd3g <= 1 AND Tmem119 <= 7 AND Cd8a <= 2 AND Pnlip <= 0 AND Fosl1 <= 0 AND Dmbt1 <= 0 AND Cela2a <= 0 AND Cdh1 <= 0 AND Gpr34 <= 28 AND Epcam <= 3 AND Lpcat2 <= 138 AND Cdhr5 <= 0 AND Ccr9 > 4 AND Sfn <= 17 AND Ctrb1 <= 0 AND Dmkn <= 0 AND Cldn3 <= 0 AND Csf1r <= 719 AND P2ry12 <= 102 AND Hpgds <= 18 AND Cd3e <= 1	Marrow
Rule354	Ptprcap > 8 AND Cd3g <= 1 AND Tmem119 <= 5 AND P2ry12 > 5 AND Ptprcap <= 48	Trachea
Rule355	Ptprcap > 8 AND Cd3g <= 1 AND Tmem119 <= 5 AND C1qc > 244 AND Ccr9 <= 20 AND Pigr <= 0 AND Hexb > 92	Kidney
Rule356	Ptprcap > 8 AND Cd3g <= 1 AND Tmem119 <= 5 AND Cd8b1 <= 3 AND Pnlip <= 0 AND Calm4 > 0 AND 1190003J15Rik <= 5 AND Pigr <= 0 AND Klk10 <= 0 AND Cldn3 <= 0 AND Dsg3 <= 0 AND 1190003J15Rik <= 0 AND Krt19 <= 0 AND P2ry13 <= 0 AND Myb <= 0 AND Trim29 <= 0 AND C1qc <= 0 AND Krt15 > 0	Fat
Rule357	Ptprcap > 8 AND Cd3g <= 1 AND Tmem119 <= 5 AND Cd8b1 <= 3 AND Pnlip <= 0 AND Cela2a <= 0 AND Cdh1 <= 0 AND Fosl1 <= 0 AND Epcam <= 3 AND Myb > 0 AND Scgn <= 0 AND Cd3d <= 182 AND Tcf7 > 45 AND Tmem119 <= 0 AND Ctsd <= 719	Trachea
Rule358	Ptprcap > 8 AND Cd3g <= 1 AND Tmem119 <= 5 AND Cd8b1 <= 3 AND Pnlip <= 0 AND Cela2a <= 0 AND Cdh1 <= 0 AND Gpr34 <= 104 AND Fosl1 <= 0 AND Epcam <= 3 AND Lpcat2 <= 115 AND Krt13 <= 0 AND Tmem27 <= 0 AND Cd79b > 296 AND Mobp <= 1 AND Ins2 <= 6 AND Tcf7 > 8 AND Lgals4 <= 20	Marrow
Rule359	Ptprcap > 8 AND Cd3g <= 1 AND Tmem119 <= 5 AND Cd8b1 <= 3 AND Pnlip <= 0 AND Cela2a <= 0 AND Dsc3 <= 0 AND Fosl1 <= 0 AND Epcam <= 3 AND Lpcat2 <= 115 AND Cd79b > 270 AND Mobp <= 1 AND Ins2 <= 6 AND Klk1 <= 0 AND Gc <= 0 AND Trim29 <= 0 AND Krt13 <= 0 AND Lypd3 <= 0 AND Krt5 <= 1 AND Tmem27 <= 0 AND Krt14 <= 0 AND Cd8a <= 0 AND Krt15 <= 2 AND Chga <= 0 AND Cx3cr1 <= 1 AND C1qb <= 0 AND Cdh17 <= 0…	Spleen
Rule360	Ptprcap > 8 AND Cd3g <= 1 AND Tmem119 <= 5 AND Cd8b1 <= 3 AND Pnlip <= 0 AND Cela2a <= 0 AND Dsc3 <= 0 AND Fosl1 <= 0 AND Epcam <= 3 AND Lpcat2 <= 115 AND Cd79b > 270 AND Mobp <= 1 AND Ins2 <= 6 AND Klk1 <= 0 AND Gc <= 0 AND Trim29 <= 0 AND Krt13 <= 0 AND Lypd3 <= 0 AND Krt5 <= 1 AND Tmem27 <= 0 AND Cx3cr1 <= 1 AND Chga <= 0 AND Anxa8 <= 0 AND Krt14 <= 0 AND Krt15 <= 2 AND C1qb <= 0 AND Cdh17 <= …	Spleen
Rule361	Ptprcap > 8 AND Cd3g <= 1 AND Tmem119 <= 5 AND Cd8b1 <= 3 AND Pnlip <= 0 AND Cela2a <= 0 AND Dsc3 <= 0 AND Fosl1 <= 0 AND Epcam <= 3 AND Lpcat2 <= 115 AND Cd79b > 296 AND Mobp <= 1 AND Ins2 <= 6 AND Gc <= 0 AND Klk1 <= 0 AND Trim29 <= 0 AND Krt13 <= 0 AND Lypd3 <= 0 AND Cx3cr1 <= 1 AND Krt5 <= 1 AND Tmem27 <= 0 AND Chga <= 0 AND Anxa8 <= 0 AND Krt14 <= 0 AND Krt15 <= 2 AND C1qa > 1 AND Sfn <= 14 …	Spleen
Rule362	Ptprcap > 8 AND Cd3g <= 1 AND Tmem119 <= 5 AND Cd8b1 <= 3 AND Pnlip <= 0 AND Cela2a <= 0 AND Cdh1 <= 0 AND Gpr34 <= 104 AND Fosl1 <= 0 AND Epcam <= 3 AND Lpcat2 <= 115 AND Krt13 <= 0 AND Tmem27 <= 0 AND Cd79b > 296 AND Mobp <= 1 AND Ins2 <= 6 AND Gc <= 0 AND Lypd3 <= 0 AND Cd8b1 <= 0 AND Klk1 <= 0 AND Krt6a <= 0 AND Cd8a <= 0 AND Anxa8 <= 0 AND Krt15 <= 2 AND Sfn <= 5 AND Asb5 > 0 AND Krt5 <= 0 A…	Fat
Rule363	Ptprcap > 8 AND Cd3g <= 1 AND Tmem119 <= 5 AND Cd8b1 <= 3 AND Pnlip <= 0 AND Cela2a <= 0 AND Dsc3 <= 0 AND Fosl1 <= 0 AND Epcam <= 3 AND Lpcat2 <= 115 AND Cd79b > 296 AND Mobp <= 1 AND Ins2 <= 6 AND Gc <= 0 AND Klk1 <= 0 AND Krt13 <= 0 AND Lypd3 <= 0 AND Krt6a <= 0 AND Krt14 <= 0 AND Krt15 <= 2 AND Tmem27 <= 0 AND Cd8a <= 0 AND Chga <= 0 AND Cx3cr1 <= 1 AND Cdh17 > 3 AND C1qb > 0	Spleen
Rule364	Ptprcap > 8 AND Cd3g <= 1 AND Tmem119 <= 5 AND Cd8b1 <= 3 AND Pnlip <= 0 AND Cela2a <= 0 AND Dsc3 <= 0 AND Fosl1 <= 0 AND Epcam <= 3 AND Lpcat2 <= 115 AND Cd79b > 296 AND Mobp <= 1 AND Ins2 <= 6 AND Gc <= 0 AND Klk1 <= 0 AND Krt13 <= 0 AND Lypd3 <= 0 AND Krt6a <= 0 AND Krt14 <= 0 AND Krt15 <= 2 AND Tmem27 <= 0 AND Cd8a <= 0 AND Lgmn <= 314 AND C1qc <= 1 AND Cx3cr1 <= 0 AND Cdh17 > 2 AND Fam25c <=…	Muscle
Rule365	Ptprcap > 8 AND Cd3g <= 1 AND Tmem119 <= 5 AND Cd8b1 <= 3 AND Pnlip <= 0 AND Cela2a <= 0 AND Dsc3 <= 0 AND Fosl1 <= 0 AND Epcam <= 3 AND Lpcat2 <= 115 AND Cd79b > 296 AND Mobp <= 1 AND Ins2 <= 6 AND Gc <= 0 AND Klk1 <= 0 AND Krt13 <= 0 AND Lypd3 <= 0 AND Krt6a <= 0 AND Krt14 <= 0 AND Krt15 <= 2 AND Tmem27 <= 0 AND Cd8a <= 0 AND Lgmn <= 314 AND C1qc <= 1 AND Cx3cr1 <= 0 AND Chga <= 0 AND C1qb <= 0…	Spleen
Rule366	Ptprcap > 8 AND Cd3g <= 1 AND Tmem119 <= 5 AND Cd8b1 <= 3 AND Pnlip <= 0 AND Cela2a <= 0 AND Dsc3 <= 0 AND Fosl1 <= 0 AND Epcam <= 3 AND Lpcat2 <= 115 AND Cd79b > 296 AND Mobp <= 1 AND Ins2 <= 6 AND Gc <= 0 AND Klk1 <= 0 AND Krt13 <= 0 AND Lypd3 <= 0 AND Krt6a <= 0 AND Krt14 <= 0 AND Krt15 <= 2 AND Tmem27 <= 0 AND Cd8a <= 0 AND Lgmn <= 314 AND C1qc <= 1 AND Cx3cr1 <= 0 AND Chga <= 0 AND C1qb <= 0…	Spleen
Rule367	Ptprcap > 8 AND Cd3g <= 1 AND Tmem119 <= 5 AND Perp <= 7 AND Ctrb1 > 0 AND Ccr9 <= 0 AND Krt6a <= 0 AND Cldn7 <= 0 AND Mbp <= 37 AND Tmem27 <= 0 AND 2210415F13Rik <= 0	Fat
Rule368	Ptprcap > 8 AND Cd3g <= 1 AND Tmem119 <= 5 AND Perp <= 7 AND Pnlip <= 0 AND Cd3e <= 23 AND Prss2 <= 0 AND Fosl1 <= 0 AND Cela2a <= 0 AND Gpr34 <= 29 AND Epcam <= 3 AND Lpcat2 <= 110 AND Mobp <= 1 AND Tmem27 <= 0 AND Cd8a <= 0 AND Krt13 <= 0 AND Cd79b > 296 AND Ins2 <= 6 AND Gc <= 0 AND Lypd3 <= 0 AND Klk1 <= 0 AND Anxa8 <= 0 AND Krt6a <= 0 AND Krt15 <= 2 AND Sfn <= 5 AND Dmkn <= 0 AND Krt14 <= 0 …	Marrow
Rule369	Ptprcap > 8 AND Cd3g <= 1 AND Tmem119 <= 5 AND Perp <= 7 AND Pnlip <= 0 AND Cd3e <= 23 AND Prss2 <= 0 AND Fosl1 <= 0 AND Cela2a <= 0 AND Gpr34 <= 29 AND Epcam <= 3 AND Lpcat2 <= 110 AND Mobp <= 1 AND Tmem27 <= 0 AND Cd8a <= 0 AND Krt13 <= 0 AND Cd79b > 296 AND Ins2 <= 6 AND Lypd3 <= 0 AND Gc <= 0 AND Klk1 <= 0 AND Anxa8 <= 0 AND Krt6a <= 0 AND Krt15 <= 2 AND Krt14 <= 0 AND Lgmn <= 314 AND C1qc <=…	Spleen
Rule370	Ptprcap > 8 AND Cd3g <= 1 AND Tmem119 <= 5 AND Perp <= 7 AND Pnlip <= 0 AND Cd3e <= 23 AND Prss2 <= 0 AND Fosl1 <= 0 AND Cela2a <= 0 AND Gpr34 <= 29 AND Epcam <= 3 AND Mobp <= 1 AND Cd8a <= 4 AND Tmem27 <= 0 AND Lpcat2 <= 115 AND Krt13 <= 0 AND Cd79b > 296 AND Cd8b1 <= 0 AND Ins2 <= 6 AND Gc <= 0 AND Klk1 <= 0 AND Lypd3 <= 0 AND Cd8a <= 0 AND Krt6a <= 0 AND Anxa8 <= 0 AND Krt15 <= 2 AND Sfn <= 5 …	Spleen
Rule371	Ptprcap > 8 AND Cd3g <= 1 AND Tmem119 <= 5 AND Perp <= 7 AND Pnlip <= 0 AND Cd3e <= 23 AND Prss2 <= 0 AND Gpr34 <= 29 AND Fosl1 <= 0 AND Cd8a <= 4 AND Cela2a <= 0 AND Epcam <= 3 AND Mobp <= 1 AND Tmem27 <= 0 AND Lpcat2 <= 115 AND Krt13 <= 0 AND Cd79b > 296 AND Cd8b1 <= 0 AND Ins2 <= 6 AND Gc <= 0 AND Klk1 <= 0 AND Lypd3 <= 0 AND Cd8a <= 0 AND Krt6a <= 0 AND Anxa8 <= 0 AND Krt15 <= 2 AND Sfn <= 5 …	Marrow
Rule372	Ptprcap > 8 AND Cd3g <= 1 AND Tmem119 <= 5 AND Perp <= 7 AND Pnlip <= 0 AND Cd3e <= 23 AND Prss2 <= 0 AND Fosl1 <= 0 AND Cela2a <= 0 AND Gpr34 <= 29 AND Epcam <= 3 AND Lpcat2 <= 110 AND Mobp <= 1 AND Tmem27 <= 0 AND Cd8a > 3 AND Ins2 <= 5 AND Laptm5 > 22 AND Krt8 <= 1 AND Ptprcap > 73 AND Ptprcap <= 262	Marrow
Rule373	Ptprcap > 8 AND Cd3g <= 1 AND Tmem119 <= 5 AND Perp <= 7 AND Cd8b1 <= 3 AND Pnlip <= 0 AND Gpr34 <= 108 AND Fosl1 <= 0 AND Prss2 <= 0 AND Cela2a <= 0 AND Epcam <= 3 AND Mobp <= 1 AND Lpcat2 <= 115 AND Krt13 <= 0 AND Cd3e <= 9 AND Tmem27 <= 0 AND Cd79b > 296 AND Cd8b1 > 0 AND Ttr <= 0 AND Csf1r <= 0 AND Cd79b <= 2725 AND P2ry12 <= 0 AND Ptprcap > 202	Fat
Rule374	Ptprcap > 8 AND Cd3g <= 1 AND Tmem119 <= 5 AND Perp <= 7 AND Cd8b1 <= 3 AND Pnlip <= 0 AND Gpr34 <= 108 AND Fosl1 <= 0 AND Prss2 <= 0 AND Cela2a <= 0 AND Epcam <= 3 AND Mobp <= 1 AND Lpcat2 <= 115 AND Krt13 <= 0 AND Cd3e <= 9 AND Tmem27 <= 0 AND Cd79b > 296 AND Ins2 <= 6 AND Gc <= 0 AND Lypd3 <= 0 AND Klk1 <= 0 AND Cd8a <= 0 AND Krt6a <= 0 AND Anxa8 <= 0 AND Krt15 <= 2 AND Sfn <= 5 AND Dmkn <= 0 …	Spleen
Rule375	Ptprcap > 8 AND Cd3g <= 1 AND Tmem119 <= 5 AND Perp <= 7 AND Cd8b1 <= 3 AND Pnlip <= 0 AND Gpr34 <= 108 AND Fosl1 <= 0 AND Prss2 <= 0 AND Cela2a <= 0 AND Epcam <= 3 AND Mobp <= 1 AND Lpcat2 <= 115 AND Krt13 <= 0 AND Cd3e <= 9 AND Tmem27 <= 0 AND Cd79b > 296 AND Ins2 <= 6 AND Gc <= 0 AND Lypd3 <= 0 AND Klk1 <= 0 AND Cd8a <= 0 AND Krt6a <= 0 AND Anxa8 <= 0 AND Krt15 <= 2 AND Sfn <= 5 AND Dmkn <= 0 …	Spleen
Rule376	Ptprcap > 8 AND Cd3g <= 1 AND Tmem119 <= 5 AND Perp <= 7 AND Cd8b1 <= 3 AND Pnlip <= 0 AND Gpr34 <= 108 AND Fosl1 <= 0 AND Prss2 <= 0 AND Cela2a <= 0 AND Epcam <= 3 AND Mobp <= 1 AND Lpcat2 <= 115 AND Krt13 <= 0 AND Cd3e <= 9 AND Tmem27 <= 0 AND Cd79b > 296 AND Ins2 <= 6 AND Gc <= 0 AND Lypd3 <= 0 AND Klk1 <= 0 AND Cd8a <= 0 AND Krt6a <= 0 AND Anxa8 <= 0 AND Krt15 <= 2 AND Sfn <= 5 AND Dmkn <= 0 …	Spleen
Rule377	Ptprcap > 8 AND Cd3g <= 1 AND Tmem119 <= 5 AND Perp <= 7 AND Cd8b1 <= 3 AND Pnlip <= 0 AND Gpr34 <= 108 AND Fosl1 <= 0 AND Prss2 <= 0 AND Cela2a <= 0 AND Epcam <= 3 AND Mobp <= 1 AND Lpcat2 <= 115 AND Krt13 <= 0 AND Cd3e <= 9 AND Tmem27 <= 0 AND Cd79b > 296 AND Gc <= 0 AND Klk1 <= 0 AND Ins2 <= 6 AND Lypd3 <= 0 AND Cd8a <= 0 AND Krt6a <= 0 AND Anxa8 <= 0 AND Krt15 <= 2 AND Sfn <= 5 AND Dmkn <= 0 …	Spleen
Rule378	Ptprcap > 8 AND Cd3g <= 1 AND Tmem119 <= 5 AND Perp <= 7 AND Cd8b1 <= 3 AND Pnlip <= 0 AND Gpr34 <= 108 AND Fosl1 <= 0 AND Prss2 <= 0 AND Cela2a <= 0 AND Epcam <= 3 AND Mobp <= 1 AND Lpcat2 <= 115 AND Tmem27 <= 0 AND Cd8a <= 0 AND Krt13 <= 0 AND Cd79b > 296 AND Gc <= 0 AND Klk1 <= 0 AND Ins2 <= 3 AND Lypd3 <= 0 AND Krt6a <= 0 AND Anxa8 <= 0 AND Chga <= 0 AND Sfn <= 5 AND Krt15 <= 2 AND Hpgds <= 9…	Fat
Rule379	Ptprcap > 8 AND Cd3g <= 1 AND Tmem119 <= 5 AND Perp <= 7 AND Cd8b1 <= 3 AND Pnlip <= 0 AND Gpr34 <= 108 AND Fosl1 <= 0 AND Prss2 <= 0 AND Cela2a <= 0 AND Epcam <= 3 AND Mobp <= 1 AND Lpcat2 <= 115 AND Tmem27 <= 0 AND Cd8a <= 0 AND Krt13 <= 0 AND Cd79b > 296 AND Gc <= 0 AND Klk1 <= 0 AND Trim29 <= 0 AND Ins2 <= 3 AND Lypd3 <= 0 AND Cx3cr1 <= 1 AND Krt5 <= 1 AND Chga <= 0 AND Anxa8 <= 0 AND Sfn <= …	Spleen
Rule380	Ptprcap > 8 AND Cd3g <= 1 AND Tmem119 <= 5 AND Perp <= 7 AND Cd8b1 <= 3 AND Pnlip <= 0 AND Gpr34 <= 108 AND Fosl1 <= 0 AND Prss2 <= 0 AND Cela2a <= 0 AND Epcam <= 3 AND Mobp <= 1 AND Lpcat2 <= 115 AND Tmem27 <= 0 AND Cd8a <= 0 AND Krt13 <= 0 AND Cd79b > 296 AND Gc <= 0 AND Klk1 <= 0 AND Trim29 <= 0 AND Ins2 <= 3 AND Lypd3 <= 0 AND Cx3cr1 <= 1 AND Krt5 <= 1 AND Chga <= 0 AND Anxa8 <= 0 AND Sfn <= …	Spleen
Rule381	Ptprcap > 8 AND Cd3g <= 1 AND Tmem119 <= 5 AND Perp <= 7 AND Cd8b1 <= 3 AND Pnlip <= 0 AND Gpr34 <= 108 AND Fosl1 <= 0 AND Prss2 <= 0 AND Cela2a <= 0 AND Epcam <= 3 AND Mobp <= 1 AND Lpcat2 <= 115 AND Tmem27 <= 0 AND Cd3e <= 10 AND Cd8a <= 0 AND Krt13 <= 0 AND Cd79b > 296 AND Gc <= 0 AND Klk1 <= 0 AND Trim29 <= 0 AND Ins2 <= 3 AND Lypd3 <= 0 AND Cx3cr1 <= 1 AND Krt5 <= 1 AND Chga <= 0 AND Anxa8 <…	Spleen
Rule382	Ptprcap > 8 AND Cd3g <= 1 AND Tmem119 <= 5 AND Perp <= 7 AND Cd8b1 <= 3 AND Pnlip <= 0 AND Gpr34 <= 108 AND Fosl1 <= 0 AND Prss2 <= 0 AND Cela2a <= 0 AND Epcam <= 3 AND Mobp <= 1 AND Lpcat2 <= 115 AND Tmem27 <= 0 AND Cd3e <= 10 AND Cd8a <= 0 AND Krt13 <= 0 AND Cd79b > 296 AND Gc <= 0 AND Klk1 <= 0 AND Trim29 <= 0 AND Ins2 <= 3 AND Lypd3 <= 0 AND Cx3cr1 <= 1 AND Krt5 <= 1 AND Chga > 0 AND Aqp3 <= …	Spleen
Rule383	Ptprcap > 8 AND Cd3g <= 1 AND Tmem119 <= 5 AND Perp <= 7 AND Cd8b1 <= 3 AND Pnlip <= 0 AND Gpr34 <= 108 AND Fosl1 <= 0 AND Prss2 <= 0 AND Cela2a <= 0 AND Epcam <= 3 AND Mobp <= 1 AND Lpcat2 <= 115 AND Tmem27 <= 0 AND Cd3e <= 10 AND Cd8a <= 0 AND Krt13 <= 0 AND Cd79b > 296 AND Gc <= 0 AND Klk1 <= 0 AND Trim29 <= 0 AND Ins2 <= 3 AND Lypd3 <= 0 AND Cx3cr1 <= 1 AND Krt5 <= 1 AND Chga > 0 AND Ccr9 <= …	Marrow
Rule384	Ptprcap > 8 AND Cd3g <= 1 AND Tmem119 <= 5 AND Perp <= 7 AND Cd8b1 <= 3 AND Pnlip <= 0 AND Gpr34 <= 108 AND Fosl1 <= 0 AND Prss2 <= 0 AND Cela2a <= 0 AND Epcam <= 3 AND Mobp <= 1 AND Lpcat2 <= 115 AND Tmem27 <= 0 AND Cd3e <= 10 AND Cd8a <= 0 AND Krt13 <= 0 AND Cd79b > 296 AND Gc <= 0 AND Klk1 <= 0 AND Chga <= 1 AND Ins2 <= 6 AND Lypd3 <= 0 AND Cx3cr1 <= 1 AND Trim29 <= 0 AND Anxa8 <= 0 AND Krt15 …	Spleen
Rule385	Ptprcap > 8 AND Cd3g <= 1 AND Tmem119 <= 5 AND Perp <= 7 AND Cd8b1 <= 3 AND Pnlip <= 0 AND Gpr34 <= 108 AND Fosl1 <= 0 AND Prss2 <= 0 AND Cela2a <= 0 AND Epcam <= 3 AND Mobp <= 1 AND Lpcat2 <= 115 AND Tmem27 <= 0 AND Cd3e <= 10 AND Cd8a <= 0 AND Krt13 <= 0 AND Ctsd <= 543 AND Cd79b > 296 AND Ins2 <= 6 AND Lypd3 <= 0 AND Myb > 0 AND Mbp <= 1 AND Krt14 <= 0 AND Ptprc <= 281	Muscle
Rule386	Ptprcap > 8 AND Cd3g <= 1 AND Tmem119 <= 5 AND Perp <= 7 AND Cd8b1 <= 3 AND Pnlip <= 0 AND Gpr34 <= 108 AND Fosl1 <= 0 AND Prss2 <= 0 AND Cela2a <= 0 AND Epcam <= 3 AND Mobp <= 1 AND Lpcat2 <= 115 AND Tmem27 <= 0 AND Cd3e <= 10 AND Cd8a <= 0 AND Krt13 <= 0 AND Cd79b > 296 AND Gc <= 0 AND Klk1 <= 0 AND Trim29 <= 0 AND Lypd3 <= 0 AND Ins2 <= 3 AND Cx3cr1 <= 1 AND Krt5 <= 1 AND Sfn <= 5 AND Dmkn <= …	Spleen
Rule387	Ptprcap > 8 AND Cd3g <= 1 AND Tmem119 <= 5 AND Perp <= 7 AND Cd8b1 <= 3 AND Pnlip <= 0 AND Gpr34 <= 108 AND Fosl1 <= 0 AND Prss2 <= 0 AND Cela2a <= 0 AND Epcam <= 3 AND Mobp <= 1 AND Lpcat2 <= 115 AND Tmem27 <= 0 AND Cd3e <= 10 AND Cd8a <= 0 AND Krt6a <= 0 AND Krt13 <= 0 AND Cd79b > 270 AND Tcf7 <= 0 AND Klk1 > 0 AND Klk1 <= 13 AND 2210415F13Rik <= 0 AND Siglech <= 0 AND Lgmn <= 0 AND Hexb <= 1	Spleen
Rule388	Ptprcap > 8 AND Cd3g <= 1 AND Tmem119 <= 5 AND Perp <= 7 AND Cd8b1 <= 3 AND Pnlip <= 0 AND Gpr34 <= 108 AND Fosl1 <= 0 AND Prss2 <= 0 AND Cela2a <= 0 AND Epcam <= 3 AND Mobp <= 1 AND Lpcat2 <= 115 AND Tmem27 <= 0 AND Cd3e <= 10 AND Cd8a <= 0 AND Krt6a <= 0 AND Krt13 <= 0 AND Cd79b > 270 AND Klk1 > 0 AND 2210415F13Rik <= 0 AND Klk1 <= 12 AND Siglech <= 0	Marrow
Rule389	Ptprcap > 8 AND Cd3g <= 1 AND Tmem119 <= 5 AND Perp <= 7 AND Cd8b1 <= 3 AND Pnlip <= 0 AND Gpr34 <= 108 AND Fosl1 <= 0 AND Prss2 <= 0 AND Cela2a <= 0 AND Epcam <= 3 AND Mobp <= 1 AND Lpcat2 <= 115 AND Tmem27 <= 0 AND Cd3e <= 10 AND Cd8a <= 0 AND Krt6a <= 0 AND Krt13 <= 0 AND Cd79b > 270 AND Tcf7 <= 0 AND Chga <= 1 AND Ins2 <= 6 AND Gc <= 0 AND Anxa8 <= 0 AND Lgmn <= 314 AND Gpr34 <= 0 AND Krt14 <…	Marrow
Rule390	Ptprcap > 8 AND Cd3g <= 1 AND Tmem119 <= 5 AND Perp <= 7 AND Cd8b1 <= 3 AND Pnlip <= 0 AND Gpr34 <= 108 AND Fosl1 <= 0 AND Prss2 <= 0 AND Cela2a <= 0 AND Epcam <= 3 AND Mobp <= 1 AND Lpcat2 <= 115 AND Tmem27 <= 0 AND Cd3e <= 10 AND Cd8a <= 0 AND Krt6a <= 0 AND Krt13 <= 0 AND Cd79b > 270 AND Tcf7 <= 0 AND Chga <= 1 AND Ins2 <= 6 AND Gc <= 0 AND Anxa8 <= 0 AND Lgmn <= 314 AND Gpr34 <= 0 AND Krt14 <…	Spleen
Rule391	Ptprcap > 8 AND Cd3g <= 1 AND Tmem119 <= 5 AND Perp <= 7 AND Cd8b1 <= 3 AND Pnlip <= 0 AND Gpr34 <= 108 AND Fosl1 <= 0 AND Prss2 <= 0 AND Cela2a <= 0 AND Epcam <= 3 AND Mobp <= 1 AND Lpcat2 <= 115 AND Tmem27 <= 0 AND Cd3e <= 10 AND Cd8a <= 0 AND Krt6a <= 0 AND Krt13 <= 0 AND Cd79b > 270 AND Tcf7 <= 0 AND Chga <= 1 AND Ins2 <= 6 AND Gc <= 0 AND Anxa8 <= 0 AND Lgmn <= 314 AND Gpr34 <= 0 AND Krt14 <…	Spleen
Rule392	Ptprcap > 8 AND Cd3g <= 1 AND Tmem119 <= 5 AND Perp <= 7 AND Cd8b1 <= 3 AND Pnlip <= 0 AND Gpr34 <= 108 AND Fosl1 <= 0 AND Prss2 <= 0 AND Cela2a <= 0 AND Epcam <= 3 AND Mobp <= 1 AND Lpcat2 <= 115 AND Tmem27 <= 0 AND Cd3e <= 10 AND Cd8a <= 0 AND Krt6a <= 0 AND Krt13 <= 0 AND Cd79b > 270 AND Tcf7 <= 0 AND Chga <= 1 AND Ins2 <= 6 AND Gc <= 0 AND Anxa8 <= 0 AND Lgmn <= 314 AND Gpr34 <= 0 AND Krt14 <…	Spleen
Rule393	Ptprcap > 8 AND Cd3g <= 1 AND Tmem119 <= 5 AND Perp <= 7 AND Cd8b1 <= 3 AND Pnlip <= 0 AND Gpr34 <= 108 AND Fosl1 <= 0 AND Prss2 <= 0 AND Cela2a <= 0 AND Epcam <= 3 AND Mobp <= 1 AND Lpcat2 <= 115 AND Tmem27 <= 0 AND Cd3e <= 10 AND Cd8a <= 0 AND Krt6a <= 0 AND Krt13 <= 0 AND Cd79b > 270 AND Tcf7 <= 0 AND Chga <= 1 AND Gc <= 0 AND Anxa8 <= 0 AND Ins2 <= 0 AND P2ry13 <= 0 AND Lypd3 <= 0 AND Cd79b >…	Spleen
Rule394	Ptprcap > 8 AND Cd3g <= 1 AND Tmem119 <= 5 AND Perp <= 7 AND Cd8b1 <= 3 AND Pnlip <= 0 AND Gpr34 <= 108 AND Fosl1 <= 0 AND Prss2 <= 0 AND Cela2a <= 0 AND Epcam <= 3 AND Mobp <= 1 AND Lpcat2 <= 115 AND Tmem27 <= 0 AND Cd3e <= 10 AND Cd8a <= 0 AND Krt6a <= 0 AND Krt13 <= 0 AND Cd79b > 270 AND Tcf7 <= 0 AND Chga <= 1 AND Gc <= 0 AND Anxa8 <= 0 AND Ins2 <= 0 AND P2ry13 <= 0 AND Lypd3 <= 0 AND Cd79b >…	Spleen
Rule395	Ptprcap > 8 AND Cd3g <= 1 AND Tmem119 <= 5 AND Perp <= 7 AND Cd8b1 <= 3 AND Pnlip <= 0 AND Gpr34 <= 108 AND Fosl1 <= 0 AND Prss2 <= 0 AND Cela2a <= 0 AND Epcam <= 3 AND Mobp <= 1 AND Lpcat2 <= 115 AND Tmem27 <= 0 AND Cd3e <= 10 AND Cd8a <= 0 AND Krt6a <= 0 AND Krt13 <= 0 AND Cd79b > 270 AND Tcf7 <= 0 AND Chga <= 1 AND Gc <= 0 AND Anxa8 <= 0 AND Ins2 <= 0 AND P2ry13 <= 0 AND Lypd3 <= 0 AND Cd79b >…	Spleen
Rule396	Ptprcap > 8 AND Cd3g <= 1 AND Tmem119 <= 5 AND Perp <= 7 AND Cd8b1 <= 3 AND Pnlip <= 0 AND Gpr34 <= 108 AND Fosl1 <= 0 AND Prss2 <= 0 AND Cela2a <= 0 AND Epcam <= 3 AND Mobp <= 1 AND Lpcat2 <= 115 AND Tmem27 <= 0 AND Cd3e <= 10 AND Cd8a <= 0 AND Krt6a <= 0 AND Krt13 <= 0 AND Cd79b > 270 AND Tcf7 <= 0 AND Chga <= 1 AND Gc <= 0 AND Anxa8 <= 0 AND Ins2 <= 0 AND P2ry13 <= 0 AND Lypd3 <= 0 AND Cd79b >…	Spleen
Rule397	Ptprcap > 8 AND Cd3g <= 1 AND Tmem119 <= 5 AND Perp <= 7 AND Cd8b1 <= 3 AND Pnlip <= 0 AND Gpr34 <= 108 AND Fosl1 <= 0 AND Prss2 <= 0 AND Cela2a <= 0 AND Epcam <= 3 AND Mobp <= 1 AND Lpcat2 <= 115 AND Tmem27 <= 0 AND Cd3e <= 10 AND Cd8a <= 0 AND Krt6a <= 0 AND Krt13 <= 0 AND Cd79b > 270 AND Tcf7 > 1 AND Ins2 <= 3 AND Mbp <= 0	Muscle
Rule398	Ptprcap > 8 AND Cd3g <= 1 AND Tmem119 <= 5 AND Perp <= 7 AND Cd8b1 <= 3 AND Pnlip <= 0 AND Gpr34 <= 108 AND Fosl1 <= 0 AND Prss2 <= 0 AND Cela2a <= 0 AND Epcam <= 3 AND Mobp <= 1 AND Lpcat2 <= 115 AND Tmem27 <= 0 AND Cd3e <= 10 AND Cd8a <= 0 AND Krt6a <= 0 AND Krt13 <= 0 AND Cd79b > 270 AND Chga <= 1 AND Ins2 <= 6 AND Gc <= 0 AND Anxa8 <= 0 AND Sfn <= 5 AND Lypd3 <= 0 AND Oit1 > 0 AND Epcam <= 1 …	Marrow
Rule399	Ptprcap > 8 AND Cd3g <= 1 AND Tmem119 <= 5 AND Perp <= 7 AND Cd8b1 <= 3 AND Pnlip <= 0 AND Gpr34 <= 108 AND Fosl1 <= 0 AND Prss2 <= 0 AND Cela2a <= 0 AND Epcam <= 3 AND Mobp <= 1 AND Lpcat2 <= 115 AND Tmem27 <= 0 AND Cd3e <= 10 AND Cd8a <= 0 AND Krt6a <= 0 AND Krt13 <= 0 AND Cd79b > 270 AND Chga <= 1 AND Ins2 <= 6 AND Gc <= 0 AND Anxa8 <= 0 AND Sfn <= 5 AND Lypd3 <= 0 AND Cd79b <= 1952 AND Hpgds …	Spleen
Rule400	Ptprcap > 8 AND Cd3g <= 1 AND Tmem119 <= 5 AND Perp <= 7 AND Cd8b1 <= 3 AND Pnlip <= 0 AND Gpr34 <= 108 AND Fosl1 <= 0 AND Prss2 <= 0 AND Cela2a <= 0 AND Epcam <= 3 AND Mobp <= 1 AND Lpcat2 <= 115 AND Tmem27 <= 0 AND Cd3e <= 10 AND Cd8a <= 0 AND Krt6a <= 0 AND Krt13 <= 0 AND Cd79b > 270 AND Chga <= 1 AND Ins2 <= 6 AND Gc <= 0 AND Anxa8 <= 0 AND Lgmn > 314 AND Clca2 <= 0 AND Pigr <= 0 AND Chga <= …	Spleen
Rule401	Ptprcap > 8 AND Cd3g <= 1 AND Tmem119 <= 5 AND Perp <= 7 AND Cd8b1 <= 3 AND Pnlip <= 0 AND Gpr34 <= 108 AND Fosl1 <= 0 AND Prss2 <= 0 AND Cela2a <= 0 AND Epcam <= 3 AND Mobp <= 1 AND Lpcat2 <= 115 AND Tmem27 <= 0 AND Cd3e <= 10 AND Cd8a <= 0 AND Krt6a <= 0 AND Krt13 <= 0 AND Cd79b > 270 AND Chga <= 1 AND Ins2 <= 6 AND Gc <= 0 AND Anxa8 <= 0 AND Lgmn <= 314 AND Trim29 <= 0 AND Gpr34 <= 0 AND P2ry1…	Spleen
Rule402	Ptprcap > 8 AND Cd3g <= 1 AND Tmem119 <= 5 AND Perp <= 7 AND Cd8b1 <= 3 AND Pnlip <= 0 AND Gpr34 <= 108 AND Fosl1 <= 0 AND Prss2 <= 0 AND Cela2a <= 0 AND Epcam <= 3 AND Mobp <= 1 AND Lpcat2 <= 115 AND Tmem27 <= 0 AND Cd3e <= 10 AND Cd8a <= 0 AND Krt6a <= 0 AND Krt13 <= 0 AND Cd79b > 270 AND Chga <= 1 AND Ins2 <= 6 AND Gc <= 0 AND Anxa8 <= 0 AND Lgmn <= 314 AND Trim29 > 0 AND Tcf7 <= 0 AND Cldn3 <…	Fat
Rule403	Ptprcap > 8 AND Cd3g <= 1 AND Tmem119 <= 5 AND Perp <= 7 AND Cd8b1 <= 3 AND Pnlip <= 0 AND Gpr34 <= 108 AND Fosl1 <= 0 AND Prss2 <= 0 AND Cela2a <= 0 AND Epcam <= 3 AND Mobp <= 1 AND Lpcat2 <= 115 AND Tmem27 <= 0 AND Cd3e <= 10 AND Cd8a <= 0 AND Krt6a <= 0 AND Krt13 <= 0 AND Cd79b > 270 AND Chga <= 1 AND Ins2 <= 6 AND Gc <= 0 AND Anxa8 <= 0 AND Lgmn <= 314 AND Gpr34 <= 0 AND Cd79b <= 1940 AND Ttr…	Spleen
Rule404	Ptprcap > 8 AND Cd3g <= 1 AND Tmem119 <= 5 AND Perp <= 7 AND Cd8b1 <= 3 AND Pnlip <= 0 AND Gpr34 <= 108 AND Fosl1 <= 0 AND Prss2 <= 0 AND Cela2a <= 0 AND Epcam <= 3 AND Mobp <= 1 AND Lpcat2 <= 115 AND Tmem27 <= 0 AND Cd3e <= 10 AND Cd8a <= 0 AND Krt6a <= 0 AND Krt13 <= 0 AND Cd79b > 270 AND Chga <= 1 AND Ins2 <= 6 AND Gc <= 0 AND Anxa8 <= 0 AND Lgmn <= 314 AND Gpr34 <= 0 AND Ttr <= 0 AND C1qb <= …	Marrow
Rule405	Ptprcap > 8 AND Cd3g <= 1 AND Tmem119 <= 5 AND Perp <= 7 AND Cd8b1 <= 3 AND Gpr34 <= 108 AND Pnlip <= 0 AND Fosl1 <= 0 AND Prss2 <= 0 AND Cela2a <= 0 AND Epcam <= 3 AND Mobp <= 1 AND Lpcat2 <= 115 AND Tmem27 <= 0 AND Cd3e <= 10 AND Cd8a <= 0 AND Krt6a <= 0 AND Krt13 <= 0 AND Cd79b > 270 AND Chga <= 1 AND Ins2 <= 6 AND Gc <= 0 AND Anxa8 <= 0 AND Lgmn <= 314 AND Gpr34 <= 0 AND Cd79b <= 1940 AND Ttr…	Spleen
Rule406	Ptprcap > 8 AND Cd3g <= 1 AND Tmem119 <= 5 AND Perp <= 7 AND Cd8b1 <= 3 AND Gpr34 <= 108 AND Pnlip <= 0 AND Fosl1 <= 0 AND Prss2 <= 0 AND Cela2a <= 0 AND Epcam <= 3 AND Mobp <= 1 AND Lpcat2 <= 115 AND Tmem27 <= 0 AND Cd3e <= 10 AND Cd8a <= 0 AND Krt6a <= 0 AND Krt13 <= 0 AND Coro1a > 418 AND Anxa8 > 1 AND C1qb <= 0 AND Tmem119 <= 0	Lung
Rule407	Ptprcap > 8 AND Cd3g <= 1 AND Tmem119 <= 5 AND Perp <= 7 AND Cd8b1 <= 3 AND Gpr34 <= 108 AND Pnlip <= 0 AND Fosl1 <= 0 AND Prss2 <= 0 AND Cela2a <= 0 AND Epcam <= 3 AND Mobp <= 1 AND Tmem27 <= 0 AND Lpcat2 <= 115 AND Cd3e <= 10 AND Cd8a <= 0 AND Krt6a <= 0 AND Krt13 <= 0 AND Cdh1 <= 0 AND Klk1 <= 0 AND Ptprcap > 143 AND Tcf7 > 285 AND Krt5 <= 0 AND C1qb <= 0	Marrow
Rule408	Ptprcap > 8 AND Cd3g <= 1 AND Tmem119 <= 5 AND Perp <= 7 AND Cd8b1 <= 3 AND Gpr34 <= 108 AND Pnlip <= 0 AND Fosl1 <= 0 AND Prss2 <= 0 AND Cela2a <= 0 AND Epcam <= 3 AND Mobp <= 1 AND Tmem27 <= 0 AND Lpcat2 <= 115 AND Cd3e <= 10 AND Cd8a <= 0 AND Krt6a <= 0 AND Krt13 <= 0 AND Cdh1 <= 0 AND Ckmt1 > 0 AND Klk1 <= 0 AND Chga > 0 AND Ctsd <= 2	Fat
Rule409	Ptprcap > 8 AND Cd3g <= 1 AND Tmem119 <= 5 AND Perp <= 7 AND Cd8b1 <= 3 AND Gpr34 <= 108 AND Pnlip <= 0 AND Fosl1 <= 0 AND Prss2 <= 0 AND Cela2a <= 0 AND Epcam <= 3 AND Mobp <= 1 AND Tmem27 <= 0 AND Lpcat2 <= 115 AND Cd3e <= 10 AND Cd8a <= 0 AND Krt6a <= 0 AND Krt13 <= 0 AND Cdh1 <= 0 AND Klk1 <= 0 AND Cd79b > 270 AND Chga <= 1 AND Ins2 <= 6 AND Gc <= 0 AND Anxa8 <= 0 AND Krt15 <= 2 AND Lgmn <= 3…	Spleen
Rule410	Ptprcap > 8 AND Cd3g <= 1 AND Tmem119 <= 5 AND Perp <= 7 AND Cd8b1 <= 3 AND Gpr34 <= 108 AND Pnlip <= 0 AND Fosl1 <= 0 AND Prss2 <= 0 AND Cela2a <= 0 AND Epcam <= 3 AND Mobp <= 1 AND Tmem27 <= 0 AND Cd8a <= 0 AND Lpcat2 <= 115 AND Krt6a <= 0 AND Cdh1 <= 0 AND Krt13 <= 0 AND Klk1 <= 0 AND Cd79b > 270 AND Chga <= 1 AND Ins2 > 6 AND Krt19 <= 0 AND Krt8 <= 0 AND C1qb <= 0 AND P2ry12 <= 0 AND Mbp <= 4…	Lung
Rule411	Ptprcap > 8 AND Cd3g <= 1 AND Tmem119 <= 5 AND Perp <= 7 AND Cd8b1 <= 3 AND Gpr34 <= 114 AND Pnlip <= 0 AND Fosl1 <= 0 AND Prss2 <= 0 AND Cela2a <= 0 AND Epcam <= 3 AND Mobp <= 1 AND Lpcat2 <= 115 AND Tmem27 <= 0 AND Cd3e <= 10 AND Cd8a <= 0 AND Krt6a <= 0 AND Krt13 <= 0 AND Cdh1 <= 0 AND Klk1 <= 0 AND Cd79b > 270 AND Chga <= 1 AND Gc <= 0 AND Anxa8 <= 0 AND Krt15 <= 2 AND Lgmn <= 314 AND Cd79b >…	Spleen
Rule412	Ptprcap > 8 AND Cd3g <= 1 AND Tmem119 <= 5 AND Perp <= 7 AND Cd8b1 <= 3 AND Gpr34 <= 114 AND Pnlip <= 0 AND Fosl1 <= 0 AND Prss2 <= 0 AND Cela2a <= 0 AND Epcam <= 3 AND Mobp <= 1 AND Lpcat2 <= 115 AND Tmem27 <= 0 AND Cd3e <= 10 AND Cd8a <= 0 AND Krt6a <= 0 AND Krt13 <= 0 AND Cdh1 <= 0 AND Klk1 <= 0 AND Cd79b > 270 AND Chga <= 1 AND Gc <= 0 AND Anxa8 <= 0 AND Krt15 <= 2 AND Lgmn <= 314 AND Cd79b >…	Spleen
Rule413	Ptprcap > 8 AND Cd3g <= 1 AND Tmem119 <= 5 AND Perp <= 7 AND Cd8b1 <= 3 AND Gpr34 <= 114 AND Pnlip <= 0 AND Fosl1 <= 0 AND Prss2 <= 0 AND Cela2a <= 0 AND Epcam <= 3 AND Mobp <= 1 AND Lpcat2 <= 115 AND Tmem27 <= 0 AND Cd3e <= 10 AND Cd8a <= 0 AND Krt6a <= 0 AND Krt13 <= 0 AND Cdh1 <= 0 AND Klk1 <= 0 AND Cd79b > 270 AND Chga <= 1 AND Gc <= 0 AND Anxa8 <= 0 AND Krt15 <= 2 AND Lgmn <= 314 AND Cd79b >…	Spleen
Rule414	Ptprcap > 8 AND Cd3g <= 1 AND Tmem119 <= 5 AND Perp <= 7 AND Cd8b1 <= 3 AND Gpr34 <= 114 AND Pnlip <= 0 AND Fosl1 <= 0 AND Prss2 <= 0 AND Cela2a <= 0 AND Epcam <= 3 AND Mobp <= 1 AND Lpcat2 <= 115 AND Tmem27 <= 0 AND Cd3e <= 10 AND Cd8a <= 0 AND Krt6a <= 0 AND Krt13 <= 0 AND Cdh1 <= 0 AND Klk1 <= 0 AND Cd79b > 270 AND Chga <= 1 AND Gc <= 0 AND Anxa8 <= 0 AND Krt15 <= 2 AND Lgmn <= 314 AND Cd79b >…	Spleen
Rule415	Ptprcap > 8 AND Cd3g <= 1 AND Tmem119 <= 5 AND Dsp > 2 AND Krt19 <= 58 AND C1qc > 0	Muscle
Rule416	Ptprcap > 8 AND Cd3g <= 1 AND Tmem119 <= 5 AND Perp <= 7 AND Cd8b1 <= 3 AND Gpr34 <= 108 AND Pnlip <= 0 AND Fosl1 <= 0 AND Prss2 <= 0 AND Cela2a <= 0 AND Epcam <= 3 AND Mobp <= 1 AND Lpcat2 <= 115 AND Tmem27 <= 0 AND Cd3e <= 10 AND Cd8a <= 0 AND Krt6a <= 0 AND Krt13 <= 0 AND Cdh1 <= 0 AND Klk1 <= 0 AND Cd79b > 270 AND Chga <= 1 AND Gc <= 0 AND Anxa8 <= 0 AND Krt15 <= 2 AND Lgmn <= 314 AND Cd79b >…	Marrow
Rule417	Ptprcap > 8 AND Cd3g <= 1 AND Tmem119 <= 5 AND Perp <= 7 AND Cd8b1 <= 3 AND Gpr34 <= 108 AND Pnlip <= 0 AND Fosl1 <= 0 AND Prss2 <= 0 AND Cela2a <= 0 AND Epcam <= 3 AND Mobp <= 1 AND Tmem27 <= 0 AND Cd8a <= 0 AND Lpcat2 <= 115 AND Krt6a <= 0 AND Cdh1 <= 0 AND Krt13 <= 0 AND Klk1 <= 0 AND Cd79b > 270 AND Chga <= 1 AND Gc <= 0 AND Anxa8 <= 0 AND Krt15 <= 2 AND Lgmn <= 314 AND Cd79b > 1920 AND Cdhr5…	Spleen
Rule418	Ptprcap > 8 AND Cd3g <= 1 AND Tmem119 <= 5 AND Perp <= 7 AND Cd8b1 <= 3 AND Gpr34 <= 108 AND Pnlip <= 0 AND Fosl1 <= 0 AND Prss2 <= 0 AND Cela2a <= 0 AND Epcam <= 3 AND Mobp <= 1 AND Tmem27 <= 0 AND Cd8a <= 0 AND Lpcat2 <= 115 AND Krt6a <= 0 AND Cdh1 <= 0 AND Krt13 <= 0 AND Klk1 <= 0 AND Cd79b > 270 AND Chga <= 1 AND Gc <= 0 AND Anxa8 <= 0 AND Krt15 <= 2 AND Lgmn <= 314 AND Cd79b > 1920 AND Cdhr5…	Marrow
Rule419	Ptprcap > 8 AND Cd3g <= 1 AND Tmem119 <= 5 AND Perp <= 7 AND Cd8b1 <= 3 AND Gpr34 <= 108 AND Pnlip <= 0 AND Fosl1 <= 0 AND Prss2 <= 0 AND Cela2a <= 0 AND Epcam <= 3 AND Mobp <= 1 AND Tmem27 <= 0 AND Cd8a <= 0 AND Lpcat2 <= 115 AND Krt6a <= 0 AND Cdh1 <= 0 AND Krt13 <= 0 AND Klk1 <= 0 AND Cd79b > 270 AND Chga <= 1 AND Gc <= 0 AND Anxa8 <= 0 AND Krt15 <= 2 AND Lgmn <= 314 AND Cd79b > 1920 AND Cdhr5…	Spleen
Rule420	Ptprcap > 8 AND Cd3g <= 1 AND Tmem119 <= 5 AND Perp <= 7 AND Cd8b1 <= 3 AND Gpr34 <= 108 AND Pnlip <= 0 AND Fosl1 <= 0 AND Prss2 <= 0 AND Cela2a <= 0 AND Epcam <= 3 AND Mobp <= 1 AND Tmem27 <= 0 AND Cd8a <= 0 AND Lpcat2 <= 115 AND Krt6a <= 0 AND Cdh1 <= 0 AND Krt13 <= 0 AND Klk1 <= 0 AND Cd79b > 270 AND Chga <= 1 AND Gc <= 0 AND Anxa8 <= 0 AND Krt15 <= 1 AND Lgmn <= 314 AND Cd79b <= 1940 AND Ttr …	Spleen
Rule421	Ptprcap > 8 AND Cd3g <= 1 AND Tmem119 <= 5 AND Perp <= 7 AND Cd8b1 <= 3 AND Gpr34 <= 114 AND Pnlip <= 0 AND Fosl1 <= 0 AND Prss2 <= 0 AND Cela2a <= 0 AND Epcam <= 3 AND Mobp <= 1 AND Tmem27 <= 0 AND Cd8a <= 0 AND Lpcat2 <= 115 AND Krt6a <= 0 AND Cdh1 <= 0 AND Krt13 <= 0 AND Klk1 <= 0 AND Cd79b > 270 AND Epcam <= 1 AND Chga <= 1 AND Gc <= 0 AND Anxa8 <= 0 AND Krt15 <= 1 AND Lgmn <= 314 AND Cd79b <…	Marrow
Rule422	Ptprcap > 8 AND Cd3g <= 1 AND Tmem119 <= 5 AND Perp <= 7 AND Cd8b1 <= 3 AND Gpr34 <= 114 AND Pnlip <= 0 AND Fosl1 <= 0 AND Prss2 <= 0 AND Cela2a <= 0 AND Epcam <= 3 AND Mobp <= 1 AND Tmem27 <= 0 AND Cd8a <= 0 AND Lpcat2 <= 115 AND Krt6a <= 0 AND Cdh1 <= 0 AND Krt13 <= 0 AND Klk1 <= 0 AND Cd79b > 270 AND Epcam <= 1 AND Chga <= 1 AND Gc <= 0 AND Anxa8 <= 0 AND Krt15 <= 1 AND Lgmn <= 314 AND Cd79b <…	Spleen
Rule423	Ptprcap > 8 AND Cd3g <= 1 AND Tmem119 <= 5 AND Perp <= 7 AND Cd8b1 <= 3 AND Gpr34 <= 114 AND Pnlip <= 0 AND Fosl1 <= 0 AND Prss2 <= 0 AND Cela2a <= 0 AND Epcam <= 3 AND Mobp <= 1 AND Tmem27 <= 0 AND Cd8a <= 0 AND Lpcat2 <= 115 AND Krt6a <= 0 AND Cd3e > 19 AND Ccr9 <= 0 AND Hexb <= 90	Spleen
Rule424	Ptprcap > 8 AND Cd3g <= 1 AND Tmem119 <= 5 AND Cd3e <= 26 AND Perp <= 7 AND Pnlip <= 0 AND Prss2 <= 0 AND Gpr34 <= 29 AND Fosl1 <= 0 AND Cela2a <= 0 AND Chga <= 1 AND Mobp <= 1 AND Epcam <= 3 AND Krt6a > 0 AND Tspan1 <= 0 AND Lgals4 <= 0 AND Oit1 > 0	Marrow
Rule425	Ptprcap > 8 AND Cd3g <= 1 AND Tmem119 <= 5 AND Cd3e <= 26 AND Perp <= 7 AND Pnlip <= 0 AND Prss2 <= 0 AND Gpr34 <= 29 AND Fosl1 <= 0 AND Cela2a <= 0 AND Chga <= 1 AND Mobp <= 1 AND Epcam <= 3 AND Krt6a > 0 AND Tspan1 > 0	Spleen
Rule426	Ptprcap > 8 AND Cd3g <= 1 AND Tmem119 <= 5 AND Cd3e <= 26 AND Perp <= 7 AND Pnlip <= 0 AND Prss2 <= 0 AND Gpr34 <= 29 AND Fosl1 <= 0 AND Cela2a <= 0 AND Chga <= 1 AND Mobp <= 1 AND Krt6a > 0 AND Krt13 <= 5 AND Resp18 <= 0 AND Pigr <= 0 AND Krt19 <= 0 AND 2210415F13Rik <= 0 AND Cx3cr1 <= 47 AND Lgals4 > 0	Marrow
Rule427	Ptprcap > 8 AND Cd3g <= 1 AND Tmem119 <= 5 AND Cd3e <= 26 AND Perp <= 7 AND Pnlip <= 0 AND Prss2 <= 0 AND Gpr34 <= 29 AND Fosl1 <= 0 AND Cela2a <= 0 AND Chga <= 1 AND Mobp <= 1 AND Krt6a > 0 AND Cldn3 <= 0 AND Resp18 <= 0 AND Krt13 <= 5 AND Tmem45b <= 0 AND Cx3cr1 <= 47 AND 2210415F13Rik <= 0 AND Dsc3 > 0 AND Ctsd > 0	Fat
Rule428	Ptprcap > 8 AND Cd3g <= 1 AND Tmem119 <= 5 AND Cd3e <= 26 AND Perp <= 7 AND Pnlip <= 0 AND Prss2 <= 0 AND Gpr34 <= 29 AND Fosl1 <= 0 AND Cela2a <= 0 AND Chga <= 1 AND Mobp <= 1 AND Krt6a > 0 AND Dsc3 <= 0 AND Cldn3 <= 0 AND Krt13 <= 5 AND Tmem45b <= 0 AND Trem2 <= 20 AND Krt8 > 0 AND Serpinb5 <= 0 AND Aqp3 <= 0 AND Hpgds <= 3	Marrow
Rule429	Ptprcap > 8 AND Cd3g <= 1 AND Tmem119 <= 5 AND Cd3e <= 26 AND Perp <= 7 AND Pnlip <= 0 AND Prss2 <= 0 AND Gpr34 <= 29 AND Fosl1 <= 0 AND Cela2a <= 0 AND Chga <= 1 AND Mobp <= 1 AND Krt6a > 0 AND Dsc3 <= 0 AND Crybb1 <= 9 AND Cldn3 <= 0 AND Tmem45b <= 0 AND Krt13 <= 5 AND Krt19 <= 0 AND Guca2a <= 0 AND Lypd3 <= 0 AND Coro1a > 1634 AND C1qc <= 0 AND C1qb <= 0 AND Lgmn <= 7 AND Krt14 > 0	Fat
Rule430	Ptprcap > 3 AND Cd3g <= 1 AND Tmem119 <= 7 AND Fosl1 > 1 AND Hpgds <= 33 AND Tspan8 <= 0 AND Ptprcap <= 60 AND Krt14 <= 1 AND Cd79b <= 3	Trachea
Rule431	Ptprcap > 3 AND Cd3g <= 1 AND Tmem119 <= 7 AND Perp <= 7 AND Cd8b1 <= 1 AND Cd8a <= 1 AND Pnlip <= 0 AND Gpr34 <= 28 AND Cela2a <= 0 AND Gpx2 <= 0 AND Cdhr5 <= 0 AND Sycn > 0 AND Tspan8 <= 0 AND Laptm5 <= 22	Trachea
Rule432	Ptprcap > 3 AND Cd3g <= 1 AND Tmem119 <= 7 AND Perp <= 7 AND Cd8b1 <= 1 AND Cd8a <= 1 AND Dmkn <= 1 AND Gpr34 <= 28 AND Cpa1 > 0 AND Klk1 <= 1 AND Tmem27 <= 0 AND Reg1 <= 0 AND Laptm5 <= 395 AND Chga <= 0	Fat
Rule433	Ptprcap > 3 AND Cd3g <= 1 AND Tmem119 <= 7 AND Perp <= 7 AND Cd8b1 <= 1 AND Cd8a <= 1 AND Dmkn <= 1 AND Gpr34 <= 28 AND Pnlip <= 0 AND Gpx2 <= 0 AND Cdhr5 <= 0 AND Cela2a > 0 AND Sfn <= 1 AND C1qa <= 0 AND Tcf7 <= 0 AND 2210415F13Rik <= 0 AND Rac2 > 679 AND Cd79b <= 3876 AND Tmem119 <= 0 AND Ctsd <= 2400	Marrow
Rule434	Ptprcap > 3 AND Cd3g <= 1 AND Tmem119 <= 7 AND Cela2a <= 0 AND Perp <= 7 AND Cd8b1 <= 1 AND Cd8a <= 1 AND Gpr34 <= 28 AND Pnlip > 0 AND C1qa <= 0 AND Rac2 <= 562 AND Ptprcap <= 300 AND Lgals4 <= 0 AND Lgmn <= 21	Fat
Rule435	Ptprcap > 3 AND Cd3g <= 1 AND Tmem119 <= 7 AND Cela2a <= 0 AND Perp <= 7 AND Cd8b1 <= 1 AND Cd8a <= 1 AND Gpr34 <= 28 AND Gpx2 <= 0 AND Pnlip > 0 AND Resp18 <= 1 AND Tmem119 <= 0 AND Oit1 <= 0 AND Cpa1 <= 0 AND Ptprc > 43	Lung
Rule436	Ptprcap > 3 AND Cd3g <= 1 AND Tmem119 <= 7 AND Cela2a <= 0 AND Perp <= 7 AND Cd8b1 <= 1 AND Cd8a <= 1 AND Gpr34 <= 28 AND Gpx2 <= 0 AND Cdhr5 <= 0 AND Epcam <= 2 AND Krt6a > 0 AND Mobp <= 0 AND Gpr34 > 0 AND Lypd3 <= 0	Fat
Rule437	Ptprcap > 3 AND Cd3g <= 1 AND Tmem119 <= 7 AND Cela2a <= 0 AND Perp <= 7 AND Cd8b1 <= 1 AND Cd8a <= 1 AND Gpr34 <= 28 AND Gpx2 <= 0 AND Cdhr5 <= 0 AND Epcam <= 2 AND Fosl1 > 0 AND Hpgds <= 22 AND 2210415F13Rik <= 0 AND Tspan8 <= 0 AND Clca2 <= 0 AND P2ry12 <= 111 AND Fxyd3 <= 0 AND Cd3d <= 3 AND Krt19 <= 0 AND Epcam <= 0 AND Gpr34 <= 0 AND Hexb > 0	Fat
Rule438	Ptprcap > 3 AND Cd3g <= 1 AND Tmem119 <= 7 AND Cela2a <= 0 AND Perp <= 7 AND Cd8b1 <= 1 AND Cd8a <= 1 AND Gpr34 <= 28 AND Gpx2 <= 0 AND Cdhr5 <= 0 AND Epcam <= 2 AND Krt6a > 0 AND Gpr34 <= 0 AND Mobp <= 0 AND Cd79b <= 1072 AND Lgals7 <= 0 AND Lypd3 <= 0 AND Krt17 <= 0 AND Ptprcap > 402 AND Hexb <= 0	Spleen
Rule439	Ptprcap > 3 AND Cd3g <= 1 AND Tmem119 <= 7 AND Cela2a <= 0 AND Perp <= 7 AND Cd8b1 <= 1 AND Cd8a <= 1 AND Gpr34 <= 28 AND Gpx2 <= 0 AND Cdhr5 <= 0 AND Krt6a > 0 AND Mobp <= 0 AND Dsc3 > 0	Marrow
Rule440	Ptprcap > 3 AND Cd3g <= 1 AND Tmem119 <= 7 AND Cela2a <= 0 AND Perp <= 7 AND Cd8b1 <= 1 AND Cd8a <= 1 AND Gpr34 <= 28 AND Gpx2 <= 0 AND Cdhr5 <= 0 AND Krt6a > 0 AND Mobp <= 0 AND Cldn3 <= 0 AND Krt19 > 0 AND Serpinb5 <= 0	Marrow
Rule441	Ptprcap > 3 AND Cd3g <= 1 AND Tmem119 <= 7 AND Cela2a <= 0 AND Perp <= 7 AND Cd8b1 <= 1 AND Cd8a <= 1 AND Gpr34 <= 28 AND Gpx2 <= 0 AND Cdhr5 <= 0 AND Krt6a > 0 AND Mobp <= 0 AND Cldn3 <= 0 AND Krt19 <= 0 AND Trem2 <= 20 AND Tmem45b <= 0 AND Guca2a <= 0 AND Krt17 <= 16 AND Lypd3 > 0 AND Gpr34 > 0	Lung
Rule442	Ptprcap > 3 AND Cd3g <= 1 AND Tmem119 <= 7 AND Cela2a <= 0 AND Perp <= 7 AND Cd8b1 <= 1 AND Cd8a <= 1 AND Gpr34 <= 28 AND Gpx2 <= 0 AND Cdhr5 <= 0 AND Krt6a > 0 AND Mobp <= 0 AND Tmem45b <= 0 AND Trem2 <= 20 AND 2210415F13Rik <= 0 AND Cd79b <= 1173 AND Krt17 <= 16 AND Lgals7 <= 0 AND Aqp3 <= 0 AND Laptm5 > 430 AND Krt17 <= 0	Muscle
Rule443	Ptprcap > 3 AND Cd3g <= 1 AND Tmem119 <= 7 AND Cela2a <= 0 AND Perp <= 7 AND Cd8b1 <= 1 AND Cd8a <= 1 AND Gpr34 <= 18 AND Gpx2 <= 0 AND Cdhr5 <= 0 AND Epcam <= 4 AND Guca2a <= 0 AND Krt13 <= 0 AND Cd79b > 296 AND Mobp <= 1 AND Klk1 > 0 AND Klk1 <= 12 AND P2ry13 <= 0 AND Lpcat2 <= 65	Fat
Rule444	Ptprcap > 3 AND Cd3g <= 1 AND Tmem119 <= 7 AND Cela2a <= 0 AND Perp <= 7 AND Cd8b1 <= 1 AND Cd8a <= 1 AND Gpr34 <= 18 AND Gpx2 <= 0 AND Cdhr5 <= 0 AND Epcam <= 4 AND Guca2a <= 0 AND Krt13 <= 0 AND Cd79b > 296 AND Mobp <= 1 AND Chga <= 1 AND Gc <= 0 AND Krt6a <= 0 AND Anxa8 <= 0 AND Lgmn <= 306 AND Cd8a <= 0 AND Krt14 <= 0 AND Epcam <= 1 AND Rac2 > 0 AND Krt15 <= 2 AND Csf1r <= 2 AND Cd79b > 1951 …	Spleen
Rule445	Ptprcap > 3 AND Cd3g <= 1 AND Tmem119 <= 7 AND Cela2a <= 0 AND Perp <= 7 AND Cd8b1 <= 1 AND Cd8a <= 1 AND Gpr34 <= 18 AND Gpx2 <= 0 AND Cdhr5 <= 0 AND Epcam <= 4 AND Guca2a <= 0 AND Krt13 <= 0 AND Cd79b > 296 AND Mobp <= 1 AND Gc <= 0 AND Krt6a <= 0 AND Anxa8 <= 0 AND Epcam <= 1 AND Sfn <= 3 AND Klk1 > 0 AND Klk1 <= 12 AND Ptprcap <= 393	Marrow
Rule446	Ptprcap > 3 AND Cd3g <= 1 AND Tmem119 <= 7 AND Cela2a <= 0 AND Perp <= 7 AND Cd8b1 <= 1 AND Cd8a <= 1 AND Gpr34 <= 18 AND Gpx2 <= 0 AND Cdhr5 <= 0 AND Epcam <= 4 AND Guca2a <= 0 AND Krt13 <= 0 AND Cd79b > 296 AND Mobp <= 1 AND Chga <= 1 AND Gc <= 0 AND Krt6a <= 0 AND Anxa8 <= 0 AND Lgmn <= 306 AND Cd8a <= 0 AND Krt14 <= 0 AND Epcam <= 1 AND Rac2 > 0 AND Krt15 <= 2 AND Csf1r <= 2 AND Cd79b > 1959 …	Spleen
Rule447	Ptprcap > 3 AND Cd3g <= 1 AND Tmem119 <= 7 AND Cela2a <= 0 AND Perp <= 7 AND Cd8b1 <= 1 AND Cd8a <= 1 AND Gpr34 <= 18 AND Gpx2 <= 0 AND Cdhr5 <= 0 AND Epcam <= 4 AND Guca2a <= 0 AND Krt13 <= 0 AND Cd79b > 296 AND Mobp <= 1 AND Chga <= 1 AND Gc <= 0 AND Krt6a <= 0 AND Anxa8 <= 0 AND Lgmn <= 306 AND Cd8a <= 0 AND Cd79b <= 1959 AND Sfn <= 3 AND Lypd3 <= 0 AND Fam25c > 0 AND Calm4 <= 0	Fat
Rule448	Ptprcap > 3 AND Cd3g <= 1 AND Tmem119 <= 7 AND Cela2a <= 0 AND Perp <= 7 AND Cd8b1 <= 1 AND Cd8a <= 1 AND Gpr34 <= 18 AND Gpx2 <= 0 AND Cdhr5 <= 0 AND Epcam <= 4 AND Guca2a <= 0 AND Krt13 <= 0 AND Cd79b > 296 AND Mobp <= 1 AND Chga <= 1 AND Gc <= 0 AND Krt6a <= 0 AND Anxa8 <= 0 AND Lgmn <= 306 AND Cd8a <= 0 AND Cd79b <= 1959 AND Sfn <= 3 AND Lypd3 <= 0 AND Hpgds <= 34 AND Cd3g > 0 AND Krt14 <= 0	Fat
Rule449	Ptprcap > 3 AND Cd3g <= 1 AND Tmem119 <= 7 AND Cela2a <= 0 AND Cd8b1 <= 1 AND Perp <= 33 AND Cd8a <= 1 AND Gpr34 <= 18 AND Dmbt1 <= 0 AND Cdhr5 <= 0 AND Epcam <= 4 AND Cd79b > 270 AND Mobp <= 1 AND Chga <= 1 AND Krt6a <= 0 AND Gc <= 0 AND Krt13 <= 0 AND Anxa8 <= 0 AND Lgmn <= 306 AND Cd8a <= 0 AND Perp <= 1 AND Cd79b <= 1959 AND Lypd3 <= 0 AND Lgals4 > 0 AND Pnlip <= 0 AND Gpr34 <= 0 AND Ins2 <= …	Spleen
Rule450	Ptprcap > 3 AND Cd3g <= 1 AND Tmem119 <= 7 AND Cela2a <= 0 AND Cd8b1 <= 1 AND Perp <= 33 AND Cd8a <= 1 AND Gpx2 <= 1 AND Gpr34 <= 28 AND Cdhr5 <= 0 AND Epcam <= 4 AND Guca2a <= 0 AND Krt13 <= 0 AND Cd79b > 296 AND Mobp <= 1 AND Chga <= 1 AND Gc <= 0 AND Krt6a <= 0 AND Hexb <= 820 AND Anxa8 <= 0 AND Krt14 <= 0 AND Cd8a <= 0 AND Epcam <= 1 AND Krt17 <= 0 AND Rac2 > 13 AND Krt15 <= 2 AND Csf1r <= 2 …	Spleen
Rule451	Ptprcap > 3 AND Cd3g <= 1 AND Tmem119 <= 6 AND Cela2a <= 0 AND Perp <= 7 AND Cd8b1 <= 1 AND Cd8a <= 1 AND Gpr34 <= 18 AND Gpx2 <= 0 AND Cdhr5 <= 0 AND Epcam <= 4 AND Guca2a > 0 AND Mobp <= 10 AND Oit1 <= 0 AND P2ry13 <= 6 AND Csf1r > 1	Lung
Rule452	Ptprcap > 3 AND Cd3g <= 1 AND Tmem119 <= 6 AND Cela2a <= 0 AND Perp <= 7 AND Cd8b1 <= 1 AND Cd8a <= 1 AND Gpr34 <= 18 AND Gpx2 <= 0 AND Cdhr5 <= 0 AND Epcam <= 4 AND Cd79b > 270 AND Mobp <= 1 AND Krt6a > 0 AND C1qc > 0 AND Coro1a > 490	Fat
Rule453	Ptprcap > 3 AND Cd3g <= 1 AND Tmem119 <= 6 AND Cela2a <= 0 AND Perp <= 7 AND Cd8b1 <= 1 AND Cd8a <= 1 AND Gpr34 <= 18 AND Gpx2 <= 0 AND Cdhr5 <= 0 AND Epcam <= 4 AND Cd79b > 270 AND Mobp <= 1 AND Chga <= 1 AND Gc <= 0 AND Anxa8 <= 0 AND Lpcat2 > 84 AND Rac2 <= 3964 AND C1qa <= 0	Spleen
Rule454	Ptprcap > 3 AND Cd3g <= 1 AND Tmem119 <= 6 AND Dmkn > 1 AND Cela2a <= 0 AND Chga <= 0 AND Krt8 <= 0 AND Crybb1 <= 5 AND Cdh1 <= 0 AND Krt14 > 1	Muscle
Rule455	Ptprcap > 3 AND Cd3g <= 1 AND Tmem119 <= 6 AND Perp <= 7 AND Cela2a <= 0 AND Cd8b1 <= 1 AND Cd8a <= 1 AND Gpr34 <= 8 AND Lpcat2 <= 115 AND Cdhr5 <= 0 AND Epcam <= 1 AND Mobp <= 1 AND Oit1 > 0 AND Trem2 <= 0 AND Ttr <= 0 AND Krt13 <= 0 AND Col17a1 <= 0 AND Phgr1 <= 0 AND Tmem119 <= 0 AND Chga <= 0 AND 2210415F13Rik <= 0 AND Dmkn <= 0 AND Krt17 <= 0 AND Perp <= 0 AND Anxa8 <= 0	Spleen
Rule456	Ptprcap > 3 AND Cd3g <= 1 AND Tmem119 <= 6 AND Perp <= 7 AND Cela2a <= 0 AND Cd8b1 <= 1 AND Cd8a <= 1 AND Gpr34 <= 8 AND Lpcat2 <= 115 AND Cdhr5 <= 0 AND Epcam <= 1 AND Oit1 > 0 AND Trem2 <= 0 AND Ttr <= 0 AND Lgmn <= 8 AND Ctsd <= 624 AND Krt13 <= 0 AND Krt8 <= 0	Marrow
Rule457	Ptprcap > 3 AND Cd3g <= 1 AND Tmem119 <= 6 AND Perp <= 7 AND Cela2a <= 0 AND Cd8b1 <= 1 AND Cd8a <= 1 AND Gpr34 <= 8 AND Lpcat2 <= 115 AND Cdhr5 <= 0 AND Epcam <= 1 AND Mobp <= 1 AND Klk1 <= 0 AND Oit1 <= 0 AND Krt13 <= 0 AND Cd3e <= 3 AND Cdh1 <= 0 AND Fosl1 > 0 AND Hpgds <= 22 AND P2ry12 <= 0 AND Ptprcap > 15	Marrow
Rule458	Ptprcap > 3 AND Cd3g <= 1 AND Tmem119 <= 6 AND Perp <= 7 AND Cela2a <= 0 AND Cd8b1 <= 1 AND Cd8a <= 1 AND Gpr34 <= 8 AND Lpcat2 <= 115 AND Cdhr5 <= 0 AND Epcam <= 1 AND Mobp <= 1 AND Klk1 <= 0 AND Oit1 <= 0 AND Cd79b > 264 AND Gc <= 0 AND Krt6a <= 0 AND Krt13 <= 0 AND Krt14 <= 0 AND Krt17 <= 0 AND Cd8a <= 0 AND Tmem27 > 0 AND C1qb <= 4 AND C1qc > 0	Spleen
Rule459	Ptprcap > 3 AND Cd3g <= 1 AND Tmem119 <= 6 AND Perp <= 7 AND Cela2a <= 0 AND Cd8b1 <= 1 AND Cd8a <= 1 AND Tmem27 <= 0 AND Dmbt1 <= 0 AND Gpr34 <= 28 AND Lpcat2 <= 115 AND Cdhr5 <= 0 AND Epcam <= 2 AND Mobp <= 1 AND Ctsd <= 579 AND Cd79b > 296 AND Chga <= 1 AND Gc <= 0 AND Krt13 <= 0 AND Krt14 <= 0 AND Cd8a <= 0 AND Krt17 <= 0 AND Guca2a > 0 AND Tspan1 <= 0 AND Mbp <= 0 AND Rac2 > 1075	Marrow
Rule460	Ptprcap > 3 AND Cd3g <= 1 AND Tmem119 <= 6 AND Perp <= 7 AND Cela2a <= 0 AND Cd8b1 <= 1 AND Cd8a <= 1 AND Tmem27 <= 0 AND Dmbt1 <= 0 AND Gpr34 <= 28 AND Lpcat2 <= 115 AND Cdhr5 <= 0 AND Epcam <= 2 AND Mobp <= 1 AND Ctsd <= 579 AND Cd79b > 296 AND Chga <= 1 AND Gc <= 0 AND Krt13 <= 0 AND Anxa8 <= 0 AND Krt14 <= 0 AND Krt17 <= 0 AND Cd8a <= 0 AND Rac2 > 13 AND Krt15 <= 2 AND Hpgds <= 35 AND Csf1r <…	Spleen
Rule461	Lgals7 > 27 AND Cd3d <= 4 AND Sfn > 0 AND Chodl <= 36 AND Krt8 > 340 AND Cd8a <= 0 AND Tmem45b <= 22 AND Fam25c <= 101	Mammary
Rule462	Ptprcap > 3 AND Cd3g <= 1 AND Tmem119 <= 6 AND Perp <= 7 AND Cela2a <= 0 AND Cd8b1 <= 1 AND Cd8a <= 1 AND Tmem27 <= 0 AND Dmbt1 <= 0 AND Gpr34 <= 28 AND Lpcat2 <= 115 AND Cdhr5 <= 0 AND Epcam <= 2 AND Mobp <= 1 AND Ctsd <= 579 AND Cd79b > 296 AND Chga <= 1 AND Gc <= 0 AND Krt13 <= 0 AND Krt14 <= 0 AND Cd8a <= 0 AND Krt17 <= 0 AND Lgmn <= 314 AND Fcrls <= 1 AND Krt15 <= 2 AND Krt6a <= 0 AND Cd79b …	Marrow
Rule463	Ptprcap > 3 AND Cd3g <= 1 AND Tmem119 <= 6 AND Perp <= 7 AND Cela2a <= 0 AND Cd8b1 <= 1 AND Cd8a <= 1 AND Tmem27 <= 0 AND Dmbt1 <= 0 AND Gpr34 <= 28 AND Lpcat2 <= 115 AND Cdhr5 <= 0 AND Epcam <= 2 AND Mobp <= 1 AND Ctsd <= 579 AND Cd79b > 296 AND Chga <= 1 AND Gc <= 0 AND Krt13 <= 0 AND Krt14 <= 0 AND Cd8a <= 0 AND Krt17 <= 0 AND Ptprcap <= 1415 AND Krt5 <= 0 AND Fcrls <= 1 AND Chga <= 0 AND Cx3c…	Marrow
Rule464	Ptprcap > 3 AND Cd3g <= 1 AND Tmem119 <= 6 AND Perp <= 7 AND Cela2a <= 0 AND Cd8b1 <= 1 AND Cd8a <= 1 AND Tmem27 <= 0 AND Dmbt1 <= 0 AND Gpr34 <= 28 AND Lpcat2 <= 115 AND Cdhr5 <= 0 AND Epcam <= 2 AND Mobp <= 1 AND Ctsd <= 579 AND Cd79b > 296 AND Chga <= 1 AND Gc <= 0 AND Krt13 <= 0 AND Krt14 <= 0 AND Cd8a <= 0 AND Krt17 <= 0 AND Lgmn <= 314 AND Fcrls <= 1 AND Krt15 <= 2 AND Krt6a <= 0 AND Cd79b …	Spleen
Rule465	Ptprcap > 3 AND Cd3g <= 1 AND Tmem119 <= 6 AND Perp <= 7 AND Cela2a <= 0 AND Cd8b1 <= 1 AND Cd8a <= 1 AND Tmem27 <= 0 AND Dmbt1 <= 0 AND Gpr34 <= 28 AND Lpcat2 <= 115 AND Cdhr5 <= 0 AND Epcam <= 2 AND Mobp <= 1 AND Ctsd <= 579 AND Cd79b > 296 AND Chga <= 1 AND Gc <= 0 AND Krt13 <= 0 AND Krt14 <= 0 AND Cd8a <= 0 AND Krt17 <= 0 AND Lgmn <= 314 AND Fcrls <= 1 AND Krt15 <= 2 AND Krt6a <= 0 AND Cd79b …	Marrow
Rule466	Ptprcap > 3 AND Cd3g <= 1 AND Tmem119 <= 6 AND Perp <= 7 AND Cela2a <= 0 AND Cd8b1 <= 1 AND Cd8a <= 1 AND Tmem27 <= 0 AND Dmbt1 <= 0 AND Gpr34 <= 28 AND Lpcat2 <= 115 AND Cdhr5 <= 0 AND Epcam <= 2 AND Mobp <= 1 AND Ctsd <= 579 AND Cd79b > 296 AND Chga <= 1 AND Gc <= 0 AND Krt13 <= 0 AND Krt14 <= 0 AND Cd8a <= 0 AND Krt17 <= 0 AND Lgmn <= 314 AND Fcrls <= 1 AND Krt15 <= 2 AND Krt6a <= 0 AND Cd79b …	Spleen
Rule467	Ptprcap > 3 AND Cd3g <= 1 AND Tmem119 <= 6 AND Perp <= 7 AND Cela2a <= 0 AND Cd8b1 <= 1 AND Cd8a <= 1 AND Tmem27 <= 0 AND Dmbt1 <= 0 AND Gpr34 <= 28 AND Lpcat2 <= 115 AND Cdhr5 <= 0 AND Epcam <= 2 AND Mobp <= 1 AND Ctsd <= 579 AND Cd79b > 296 AND Chga <= 1 AND Gc <= 0 AND Krt13 <= 0 AND Krt14 <= 0 AND Cd8a <= 0 AND Krt17 <= 0 AND Ptprcap <= 1415 AND Krt5 <= 0 AND Fcrls <= 1 AND Chga <= 0 AND Cx3c…	Spleen
Rule468	Ptprcap > 3 AND Cd3g <= 1 AND Tmem119 <= 6 AND Perp <= 7 AND Cela2a <= 0 AND Cd8b1 <= 1 AND Cd8a <= 1 AND Tmem27 <= 0 AND Dmbt1 <= 0 AND Gpr34 <= 28 AND Lpcat2 <= 115 AND Cdhr5 <= 0 AND Epcam <= 2 AND Mobp <= 1 AND Oit1 <= 0 AND Klk1 <= 0 AND Ctsd <= 579 AND Cd79b > 296 AND Chga <= 1 AND Gc <= 0 AND Krt13 <= 0 AND Anxa8 <= 0 AND Lgmn > 314 AND Clca2 <= 0 AND Pigr <= 0 AND Coro1a > 5381 AND P2ry12…	Lung
Rule469	Ptprcap > 3 AND Cd3g <= 1 AND Tmem119 <= 6 AND Perp <= 7 AND Cela2a <= 0 AND Cd8b1 <= 1 AND Cd8a <= 1 AND Tmem27 <= 0 AND Dmbt1 <= 0 AND Gpr34 <= 28 AND Lpcat2 <= 115 AND Cdhr5 <= 0 AND Epcam <= 2 AND Mobp <= 1 AND Oit1 <= 0 AND Klk1 <= 0 AND Ctsd <= 579 AND Cd79b > 296 AND Chga <= 1 AND Gc <= 0 AND Krt13 <= 0 AND Anxa8 <= 0 AND Cx3cr1 <= 1 AND P2ry13 <= 0 AND Cd8a <= 0 AND Krt15 <= 2 AND Ins2 <=…	Fat
Rule470	Ptprcap > 3 AND Cd3g <= 1 AND Tmem119 <= 6 AND Perp <= 7 AND Cela2a <= 0 AND Cd8b1 <= 1 AND Cd8a <= 1 AND Tmem27 <= 0 AND Dmbt1 <= 0 AND Gpr34 <= 28 AND Lpcat2 <= 115 AND Cdhr5 <= 0 AND Epcam <= 2 AND Mobp <= 1 AND Oit1 <= 0 AND Klk1 <= 0 AND Ctsd <= 579 AND Cd79b > 296 AND Chga <= 1 AND Gc <= 0 AND Krt13 <= 0 AND Anxa8 <= 0 AND Cx3cr1 <= 1 AND Krt15 <= 2 AND P2ry13 <= 0 AND Cd8a <= 0 AND Ins2 <=…	Marrow
Rule471	Ptprcap > 3 AND Cd3g <= 1 AND Tmem119 <= 6 AND Perp <= 7 AND Cela2a <= 0 AND Cd8b1 <= 1 AND Cd8a <= 1 AND Tmem27 <= 0 AND Dmbt1 <= 0 AND Gpr34 <= 28 AND Lpcat2 <= 115 AND Cdhr5 <= 0 AND Epcam <= 2 AND Mobp <= 1 AND Oit1 <= 0 AND Klk1 <= 0 AND Ctsd <= 579 AND Cd79b > 296 AND Chga <= 1 AND Gc <= 0 AND Krt13 <= 0 AND Anxa8 <= 0 AND Cx3cr1 <= 1 AND P2ry13 <= 0 AND Cd8a <= 0 AND Krt15 <= 2 AND Ins2 <=…	Spleen
Rule472	Ptprcap > 3 AND Cd3g <= 1 AND Tmem119 <= 6 AND Perp <= 7 AND Cela2a <= 0 AND Cd8b1 <= 1 AND Cd8a <= 1 AND Tmem27 <= 0 AND Dmbt1 <= 0 AND Gpr34 <= 28 AND Lpcat2 <= 115 AND Cdhr5 <= 0 AND Epcam <= 2 AND Mobp <= 1 AND Oit1 <= 0 AND Klk1 <= 0 AND Ctsd <= 579 AND Cd79b > 296 AND Chga <= 1 AND Gc <= 0 AND Krt13 <= 0 AND Anxa8 <= 0 AND Cx3cr1 <= 1 AND Krt15 <= 2 AND Cd8a <= 0 AND P2ry13 <= 0 AND Ins2 <=…	Marrow
Rule473	Ptprcap > 3 AND Cd3g <= 1 AND Tmem119 <= 6 AND Perp <= 7 AND Cela2a <= 0 AND Cd8b1 <= 1 AND Cd8a <= 1 AND Tmem27 <= 0 AND Dmbt1 <= 0 AND Gpr34 <= 28 AND Lpcat2 <= 115 AND Cdhr5 <= 0 AND Epcam <= 3 AND Mobp <= 1 AND Oit1 <= 0 AND Klk1 <= 0 AND Ctsd <= 579 AND Cd79b > 296 AND Chga <= 1 AND Gc <= 0 AND Krt13 <= 0 AND Anxa8 <= 0 AND Cx3cr1 <= 1 AND P2ry13 <= 0 AND Cd8a <= 0 AND Krt15 <= 2 AND Ins2 <=…	Spleen
Rule474	Ptprcap > 3 AND Cd3g <= 1 AND Tmem119 <= 6 AND Perp <= 7 AND Cela2a <= 0 AND Cd8b1 <= 1 AND Cd8a <= 1 AND Tmem27 <= 0 AND Gpx2 <= 0 AND Gpr34 <= 28 AND Lpcat2 <= 115 AND Cdhr5 <= 0 AND Epcam <= 2 AND Mobp <= 1 AND Ctsd <= 579 AND Cd79b > 320 AND Chga <= 1 AND Gc <= 0 AND Anxa8 <= 0 AND Krt13 <= 0 AND Cx3cr1 <= 1 AND P2ry13 <= 0 AND Cd8a <= 0 AND Gpr34 <= 0 AND Krt15 <= 2 AND Ins2 <= 0 AND Fcrls <…	Spleen
Rule475	Ptprcap > 3 AND Cd3g <= 1 AND Tmem119 <= 6 AND Perp <= 7 AND Cela2a <= 0 AND Cd8b1 <= 1 AND Cd8a <= 1 AND Tmem27 <= 0 AND Gpx2 <= 0 AND Gpr34 <= 28 AND Lpcat2 <= 115 AND Cdhr5 <= 0 AND Epcam <= 2 AND Mobp <= 1 AND Ctsd <= 579 AND Cd79b > 320 AND Chga <= 1 AND Gc <= 0 AND Anxa8 <= 0 AND Krt13 <= 0 AND Cx3cr1 <= 1 AND P2ry13 <= 0 AND Cd8a <= 0 AND Gpr34 <= 0 AND Krt15 <= 2 AND Ins2 <= 0 AND Fcrls <…	Marrow
Rule476	Ptprcap > 3 AND Cd3g <= 1 AND Tmem119 <= 6 AND Perp <= 7 AND Cela2a <= 0 AND Cd8b1 <= 1 AND Cd8a <= 1 AND Tmem27 <= 0 AND Gpx2 <= 0 AND Gpr34 <= 28 AND Lpcat2 <= 115 AND Cdhr5 <= 0 AND Epcam <= 2 AND Mobp <= 1 AND Ctsd <= 579 AND Cd79b > 320 AND Chga <= 1 AND Gc <= 0 AND Anxa8 <= 0 AND Krt13 <= 0 AND Cx3cr1 <= 1 AND Cd8a <= 0 AND Krt15 <= 2 AND Fcrls <= 0 AND P2ry13 <= 0 AND Ins2 <= 0 AND Gpr34 <…	Marrow
Rule477	Ptprcap > 3 AND Cd3g <= 1 AND Tmem119 <= 6 AND Perp <= 7 AND Cela2a <= 0 AND Cd8b1 <= 1 AND Cd8a <= 1 AND Tmem27 <= 0 AND Gpx2 <= 0 AND Gpr34 <= 28 AND Lpcat2 <= 115 AND Cdhr5 <= 0 AND Epcam <= 2 AND Mobp <= 1 AND Ctsd <= 579 AND Cd79b > 320 AND Chga <= 1 AND Gc <= 0 AND Anxa8 <= 0 AND Krt13 <= 0 AND Cx3cr1 <= 1 AND P2ry13 <= 0 AND Cd8a <= 0 AND Krt15 <= 2 AND Ins2 <= 0 AND Gpr34 <= 0 AND Fcrls <…	Marrow
Rule478	Ptprcap > 3 AND Cd3g <= 1 AND Tmem119 <= 6 AND Perp <= 7 AND Cela2a <= 0 AND Cd8b1 <= 1 AND Cd8a <= 1 AND Tmem27 <= 0 AND Gpx2 <= 0 AND Gpr34 <= 28 AND Lpcat2 <= 115 AND Cdhr5 <= 0 AND Epcam <= 2 AND Mobp <= 1 AND Ctsd <= 579 AND Cd79b > 320 AND Chga <= 1 AND Gc <= 0 AND Anxa8 <= 0 AND Cx3cr1 <= 1 AND Krt13 <= 0 AND Cd8a <= 0 AND Krt15 <= 2 AND Fcrls <= 0 AND P2ry13 <= 0 AND Ins2 <= 0 AND Gpr34 <…	Spleen
Rule479	Ptprcap > 3 AND Cd3g > 1 AND Lpcat2 <= 3 AND Tcf7 > 52 AND Fosl1 > 2 AND Myb <= 159 AND Krt14 <= 0	Marrow
Rule480	Ptprcap > 3 AND Cd3g > 1 AND Lpcat2 <= 3 AND Tcf7 > 52 AND Cela2a > 0 AND Hpgds <= 2 AND Sfn <= 0 AND Tm4sf4 <= 0	Thymus
Rule481	Ptprcap > 3 AND Cela2a <= 0 AND Cd3e > 1 AND Lpcat2 <= 2 AND Tcf7 > 52 AND Ins2 <= 0 AND Tspan8 <= 0 AND Dmkn <= 0 AND Ccr9 > 0 AND Perp <= 7 AND Col17a1 <= 0 AND Trem2 <= 0 AND Csf1r <= 0 AND Ctrb1 <= 0 AND Lgals7 <= 0 AND Tcf7 <= 1044 AND Rac2 <= 192 AND Cd3e > 3	Thymus
Rule482	Chodl > 2 AND Dmkn > 5 AND Krt13 <= 4 AND Calml3 <= 2 AND Capns2 <= 0	Bladder
Rule483	Chodl > 2 AND Tspan8 <= 1 AND Foxf1a <= 1 AND Cdh1 <= 1 AND Pitx1 <= 24 AND Tmem119 <= 129 AND Epcam <= 3 AND Pigr <= 0 AND Cd8a <= 3 AND Oit1 <= 0 AND Dsp <= 5 AND Guca2a <= 0 AND Chga <= 1 AND Pkp1 <= 0 AND Lpcat2 <= 1 AND 2210415F13Rik <= 0 AND Dmbt1 <= 0 AND Klk1 <= 0 AND Tmem119 <= 21 AND Epcam <= 1 AND Chodl > 4 AND Pitx1 <= 0 AND Prss2 <= 0 AND Ptprcap <= 0 AND Dsc3 <= 0 AND Tmem27 <= 0 AN…	Muscle
Rule484	Ptprcap > 3 AND Cela2a <= 0 AND Cd3e > 1 AND Lpcat2 <= 2 AND Ins2 <= 0 AND Csf1r > 5 AND Mobp <= 0 AND Ctsd > 220 AND Fcrls <= 69	Marrow
Rule485	Ptprcap > 3 AND Cela2a <= 0 AND Cd3e > 1 AND Lpcat2 <= 2 AND Ins2 <= 0 AND Perp <= 1 AND Chga <= 0 AND Col17a1 <= 0 AND Gpr34 > 5 AND Gc <= 0 AND Krt14 <= 2 AND Crybb1 <= 2 AND Fosl1 <= 4 AND Aqp3 > 154 AND Cd8b1 <= 1289	Trachea
Rule486	Ptprcap > 3 AND Cela2a <= 0 AND Cd3d > 74 AND Fam25c > 0 AND Tmem119 <= 0 AND Csf1r <= 0	Trachea
Rule487	Ptprcap > 3 AND Cela2a <= 0 AND Cd3d > 74 AND Lpcat2 <= 2 AND Crybb1 > 0 AND Gpr34 <= 2 AND 2210415F13Rik <= 0 AND Krt15 <= 0	Thymus
Rule488	Ptprcap > 3 AND Cela2a <= 0 AND Cd3d > 74 AND Lpcat2 <= 2 AND Ins2 <= 0 AND Chga <= 1 AND Col17a1 <= 0 AND Gc <= 0 AND Fcrls > 0 AND Pigr <= 0 AND Fcrls > 5 AND Tcf7 <= 22	Liver
Rule489	Ptprcap > 3 AND Cela2a <= 0 AND Cd3d > 74 AND Crybb1 <= 1 AND Csf1r > 12 AND Ctrl <= 20 AND Tmem119 <= 0 AND P2ry12 <= 0 AND Fcrls <= 66 AND Cd8a > 2	Lung
Rule490	Ptprcap > 3 AND Cela2a <= 0 AND Cd3d > 74 AND Crybb1 <= 1 AND Lpcat2 <= 2 AND Ins2 <= 0 AND Chga <= 1 AND Col17a1 <= 0 AND Gc <= 0 AND Fcrls > 0 AND Pigr <= 0 AND Slc2a5 <= 1 AND Epcam <= 220 AND Siglech <= 2 AND Hpgds <= 0 AND 2210415F13Rik <= 0 AND Asb5 <= 0 AND Aqp3 <= 1 AND Serpinb5 <= 0 AND Csf1r <= 10 AND Myb <= 0 AND Krt15 <= 2 AND Laptm5 > 722 AND Cd8b1 <= 2556 AND Hexb <= 1235	Thymus
Rule491	Ptprcap > 3 AND Cela2a <= 0 AND Cd3e > 1 AND Perp <= 5 AND Lpcat2 <= 2 AND Ins2 <= 0 AND Cldn3 > 1 AND Hexb <= 35 AND Cd3e <= 11	Lung
Rule492	Ptprcap > 3 AND Cela2a <= 0 AND Cd3e > 1 AND Perp <= 5 AND Lpcat2 <= 2 AND Ins2 <= 0 AND Col17a1 <= 0 AND Chga <= 0 AND Cd3g > 483 AND Cdh17 > 0 AND Hexb <= 1	Liver
Rule493	Ptprcap > 3 AND Cela2a <= 0 AND Cd3e > 1 AND Perp <= 5 AND Lpcat2 <= 2 AND Ins2 <= 0 AND Col17a1 <= 0 AND Chga <= 0 AND Gc <= 0 AND Krt15 <= 1 AND Cd3d > 413 AND Tspan8 > 2	Lung
Rule494	Ptprcap > 3 AND Cela2a <= 0 AND Cd3e > 1 AND Perp <= 5 AND Lpcat2 <= 2 AND Ins2 <= 0 AND Col17a1 <= 0 AND Chga <= 0 AND Gc <= 0 AND Krt15 <= 1 AND Cd3d > 413 AND Dmkn <= 0 AND Fxyd3 <= 0 AND Klk1 > 1 AND Hexb <= 1 AND Cdx1 <= 0	Lung
Rule495	Ptprcap > 3 AND Cela2a <= 0 AND Cd3e > 1 AND Perp <= 5 AND Lpcat2 <= 2 AND Ins2 <= 0 AND Col17a1 <= 0 AND Chga <= 0 AND Krt15 <= 1 AND Cd3g > 483 AND Myb > 252 AND Gpr34 <= 59	Fat
Rule496	Ptprcap > 3 AND Cela2a <= 0 AND Cd3e > 1 AND Perp <= 5 AND Lpcat2 <= 2 AND Ins2 <= 0 AND Col17a1 <= 0 AND Chga <= 0 AND Krt15 <= 1 AND Cd3g > 483 AND Myb > 215 AND C1qa <= 0	Trachea
Rule497	Ptprcap > 3 AND Cela2a <= 0 AND Cd3e > 1 AND Perp <= 5 AND Lpcat2 <= 2 AND Ins2 <= 0 AND Col17a1 <= 0 AND Chga <= 0 AND Krt15 <= 1 AND Cd3g > 483 AND Ckmt1 > 0 AND Mbp <= 241 AND Dmkn <= 0 AND Ccr9 <= 12	Spleen
Rule498	Ptprcap > 3 AND Cela2a <= 0 AND Cd3e > 1 AND Perp <= 5 AND Lpcat2 <= 2 AND Ins2 <= 0 AND Col17a1 <= 0 AND Chga <= 0 AND Krt15 <= 1 AND Cd3g > 483 AND Ckmt1 > 0 AND Hexb <= 1	Lung
Rule499	Ptprcap > 3 AND Cela2a <= 0 AND Cd3e > 1 AND Perp <= 5 AND Lpcat2 <= 2 AND Ins2 <= 0 AND Col17a1 <= 0 AND Chga <= 0 AND Krt15 <= 1 AND Cd3g > 483 AND Coro1a > 744 AND Guca2a <= 0 AND 1190003J15Rik <= 0 AND Dmkn > 0 AND Lgals4 <= 0	Thymus
Rule500	Ptprcap > 3 AND Cela2a <= 0 AND Cd3e > 1 AND Perp <= 5 AND Lpcat2 <= 2 AND Ins2 <= 0 AND Col17a1 <= 0 AND Chga <= 0 AND Krt15 <= 1 AND Cd3g > 483 AND Coro1a > 744 AND Guca2a <= 0 AND 1190003J15Rik <= 0 AND Ptprc <= 2040 AND Anxa8 > 0 AND Krt15 <= 0	Thymus
Rule501	Ptprcap > 3 AND Cela2a <= 0 AND Cd3e > 1 AND Perp <= 5 AND Lpcat2 <= 2 AND Ins2 <= 0 AND Col17a1 <= 0 AND Chga <= 0 AND Krt15 <= 1 AND Cd3g > 483 AND Coro1a > 744 AND Guca2a <= 0 AND 1190003J15Rik <= 0 AND Gpx2 <= 0 AND Tspan8 <= 0 AND Gc > 0	Thymus
Rule502	Ptprcap > 3 AND Cela2a <= 0 AND Cd3e > 1 AND Perp <= 5 AND Lpcat2 <= 2 AND Ins2 <= 0 AND Col17a1 <= 0 AND Gc <= 0 AND Chga <= 0 AND Krt15 <= 1 AND Cd3d > 413 AND Dmkn <= 0 AND Fxyd3 <= 0 AND Guca2a <= 0 AND 2210415F13Rik <= 0 AND Ctrl <= 0 AND Mobp <= 0 AND Cx3cr1 > 8 AND Hexb <= 146	Thymus
Rule503	Ptprcap > 3 AND Cela2a <= 0 AND Cd3e > 1 AND Perp <= 5 AND Lpcat2 <= 2 AND Ins2 <= 0 AND Col17a1 <= 0 AND Gc <= 0 AND Chga <= 0 AND Krt15 <= 1 AND Cd3d > 413 AND Dmkn <= 0 AND Cx3cr1 > 1 AND Cx3cr1 <= 89	Spleen
Rule504	Ptprcap > 3 AND Cela2a <= 0 AND Cd3e > 1 AND Perp <= 5 AND Lpcat2 <= 2 AND Ins2 <= 0 AND Col17a1 <= 0 AND Gc <= 0 AND Chga <= 0 AND Krt15 <= 1 AND Cd3d > 413 AND Dmkn <= 0 AND Cd79b <= 1438 AND Fxyd3 <= 0 AND 2210415F13Rik > 0 AND Cd8b1 <= 511 AND Hexb <= 0	Spleen
Rule505	Ptprcap > 3 AND Cela2a <= 0 AND Cd3e > 1 AND Perp <= 5 AND Lpcat2 <= 2 AND Ins2 <= 0 AND Col17a1 <= 0 AND Gc <= 0 AND Chga <= 0 AND Krt15 <= 1 AND Cd3d > 413 AND Dmkn <= 0 AND Cd79b > 1438	Marrow
Rule506	Ptprcap > 3 AND Cela2a <= 0 AND Cd3e > 1 AND Perp <= 5 AND Lpcat2 <= 2 AND Ins2 <= 0 AND Col17a1 <= 0 AND Gc <= 0 AND Chga <= 0 AND Krt15 <= 1 AND Cd3d > 413 AND Krt14 <= 2 AND Dmkn > 0 AND Lgals4 > 0	Lung
Rule507	Ptprcap > 3 AND Cela2a <= 0 AND Cd3e > 1 AND Perp <= 5 AND Lpcat2 <= 2 AND Ins2 <= 0 AND Col17a1 <= 0 AND Gc <= 0 AND Chga <= 0 AND Krt15 <= 1 AND Cd3d > 413 AND Krt14 <= 2 AND Fxyd3 <= 0 AND Guca2a <= 0 AND Krt5 <= 0 AND Cd8a > 4055 AND Gpr34 <= 0	Thymus
Rule508	Ptprcap > 3 AND Cela2a <= 0 AND Cd3e > 1 AND Perp <= 5 AND Lpcat2 <= 2 AND Ins2 <= 0 AND Col17a1 <= 0 AND Gc <= 0 AND Chga <= 0 AND Krt15 <= 1 AND Cd3d > 413 AND Krt14 <= 2 AND 2210415F13Rik > 0 AND Trem2 <= 0	Marrow
Rule509	Ptprcap > 3 AND Cela2a <= 0 AND Cd3e > 1 AND Perp <= 5 AND Lpcat2 <= 2 AND Ins2 <= 0 AND Col17a1 <= 0 AND Gc <= 0 AND Chga <= 0 AND Krt15 <= 1 AND Cd3d > 413 AND Krt14 <= 2 AND Fxyd3 <= 0 AND Guca2a <= 0 AND Krt5 <= 0 AND Ptprc <= 1726 AND Ttr > 0 AND Lgmn <= 0	Marrow
Rule510	Ptprcap > 3 AND Cela2a <= 0 AND Cd3e > 1 AND Perp <= 5 AND Lpcat2 <= 2 AND Ins2 <= 0 AND Col17a1 <= 0 AND Gc <= 0 AND Chga <= 0 AND Krt15 <= 1 AND Cd3d > 413 AND Guca2a <= 0 AND Fxyd3 <= 0 AND Mobp <= 0 AND Tspan1 <= 0 AND Ptprc <= 1726 AND Krt5 <= 0 AND Serpinb5 <= 0 AND Lpcat2 <= 0 AND Slc2a5 <= 0 AND Perp <= 0 AND Cdh1 <= 0 AND Tcf7 > 2472 AND Coro1a > 2247	Thymus
Rule511	Ptprcap > 3 AND Cela2a <= 0 AND Cd3e > 1 AND Perp <= 5 AND Lpcat2 <= 2 AND Ins2 <= 0 AND Col17a1 <= 0 AND Gc <= 0 AND Chga <= 0 AND Krt15 <= 1 AND Cd3d > 425 AND Guca2a <= 0 AND Fxyd3 <= 0 AND Krt14 <= 2 AND Krt5 <= 0 AND Tcf7 > 2705 AND Ptprcap <= 1170	Marrow
Rule512	Ptprcap > 3 AND Cela2a <= 0 AND Cd3e > 1 AND Perp <= 5 AND Lpcat2 <= 2 AND Ins2 <= 0 AND Col17a1 <= 0 AND Gc <= 0 AND Chga <= 0 AND Krt15 <= 1 AND Cd3d > 425 AND Guca2a <= 0 AND Krt14 <= 2 AND Fxyd3 <= 0 AND Krt5 <= 0 AND Cldn3 > 0 AND Epcam > 2	Thymus
Rule513	Ptprcap > 3 AND Cela2a <= 0 AND Cd3e > 1 AND Perp <= 5 AND Lpcat2 <= 2 AND Ins2 <= 0 AND Col17a1 <= 0 AND Gc <= 0 AND Chga <= 0 AND Krt15 <= 1 AND Cd3d > 425 AND Guca2a <= 0 AND Krt14 <= 2 AND Fxyd3 <= 0 AND Krt5 <= 0 AND Serpinb5 <= 0 AND Slc2a5 > 0	Thymus
Rule514	Ptprcap > 3 AND Cela2a <= 0 AND Cd3e > 1 AND Perp <= 5 AND Lpcat2 <= 2 AND Ins2 <= 0 AND Col17a1 <= 0 AND Gc <= 0 AND Chga <= 0 AND Krt15 <= 1 AND Cd3d > 425 AND Guca2a <= 0 AND Krt14 <= 2 AND Fxyd3 <= 0 AND Krt5 <= 0 AND Serpinb5 <= 0 AND Mobp > 0 AND Cd8b1 <= 80	Spleen
Rule515	Ptprcap > 3 AND Cela2a <= 0 AND Cd3e > 1 AND Perp <= 5 AND Lpcat2 <= 2 AND Ins2 <= 0 AND Col17a1 <= 0 AND Gc <= 0 AND Chga <= 0 AND Krt15 <= 1 AND Cd3d > 425 AND Krt14 <= 2 AND Fxyd3 <= 0 AND Mobp > 0 AND Coro1a > 3252	Marrow
Rule516	Ptprcap > 3 AND Cela2a <= 0 AND Cd3e > 1 AND Perp <= 5 AND Lpcat2 <= 2 AND Ins2 <= 0 AND Col17a1 <= 0 AND Gc <= 0 AND Chga <= 0 AND Krt15 <= 1 AND Cd3d > 425 AND Krt14 <= 2 AND Fxyd3 <= 0 AND Guca2a <= 0 AND Krt5 <= 0 AND Ptprc <= 1726 AND Serpinb5 <= 0 AND Lpcat2 > 0 AND Fcrls <= 0 AND Asb5 <= 0 AND Epcam <= 9	Thymus
Rule517	Ptprcap > 3 AND Cela2a <= 0 AND Cd3e > 1 AND Perp <= 5 AND Lpcat2 <= 2 AND Ins2 <= 0 AND Col17a1 <= 0 AND Gc <= 0 AND Chga <= 0 AND Krt15 <= 1 AND Cd3d > 425 AND Krt14 <= 2 AND Fxyd3 <= 0 AND Guca2a <= 0 AND Lpcat2 > 0 AND Ptprcap <= 1383 AND Epcam <= 9	Spleen
Rule518	Ptprcap > 3 AND Cela2a <= 0 AND Cd3e > 1 AND Perp <= 5 AND Lpcat2 <= 2 AND Ins2 <= 0 AND Col17a1 <= 0 AND Gc <= 0 AND Chga <= 0 AND Krt15 <= 1 AND Cd3d > 425 AND Krt14 <= 2 AND Lpcat2 > 0 AND Tmem119 <= 0	Fat
Rule519	Ptprcap > 3 AND Cela2a <= 0 AND Cd3e > 1 AND Perp <= 5 AND Lpcat2 <= 2 AND Ins2 <= 0 AND Col17a1 <= 0 AND Gc <= 0 AND Chga <= 0 AND Krt15 <= 1 AND Cd3d > 425 AND Krt14 <= 2 AND Fxyd3 <= 0 AND Guca2a <= 0 AND Cdh1 <= 0 AND Ptprc <= 1726 AND Krt5 <= 0 AND Serpinb5 <= 0 AND Cd3e <= 35 AND Cd3g <= 333 AND Perp <= 0	Spleen
Rule520	Ptprcap > 3 AND Cela2a <= 0 AND Cd3e > 1 AND Perp <= 5 AND Lpcat2 <= 2 AND Ins2 <= 0 AND Col17a1 <= 0 AND Gc <= 0 AND Chga <= 0 AND Krt15 <= 1 AND Cd3d > 425 AND Krt14 <= 2 AND Fxyd3 <= 0 AND Guca2a <= 0 AND Ptprc <= 1726 AND Cdh1 <= 0 AND Krt5 <= 0 AND P2ry13 <= 0 AND Cd3e <= 35 AND Clca2 <= 0 AND Lgmn <= 1 AND Perp <= 0 AND C1qa <= 1 AND P2ry12 <= 1 AND C1qc <= 0 AND Tmem119 > 0	Thymus
Rule521	Ptprcap > 3 AND Cela2a <= 0 AND Cd3e > 0 AND Lpcat2 <= 3 AND Col17a1 > 0 AND Cd79b <= 359 AND Mbp <= 4 AND C1qb <= 0 AND 1190003J15Rik <= 1	Fat
Rule522	Ptprcap > 3 AND Cela2a <= 0 AND Cd3e > 1 AND Perp <= 7 AND Lpcat2 <= 2 AND Ins2 <= 0 AND Col17a1 <= 0 AND Gc <= 0 AND Chga <= 0 AND Krt15 <= 1 AND C1qc <= 0 AND Ccr9 > 0 AND Gpx2 <= 0 AND Siglech <= 1 AND Dsc3 <= 0 AND Pigr <= 0 AND Tmem119 <= 0 AND Trem2 <= 0 AND Guca2a <= 0 AND Lypd3 <= 0 AND Klk1 <= 0 AND Ckmt1 <= 0 AND Tspan8 <= 0 AND Krt8 <= 2 AND Gpr34 <= 4 AND Try5 <= 0 AND Pnlip <= 0 AND …	Thymus
Rule523	Ptprcap > 3 AND Cela2a <= 0 AND Cd3e > 0 AND Lpcat2 <= 3 AND Ins2 <= 0 AND Col17a1 <= 0 AND Perp > 2 AND Trim29 <= 69 AND Lgals4 <= 0 AND Ctsd <= 110	Muscle
Rule524	Ptprcap > 3 AND Cela2a <= 0 AND Cd3e > 0 AND Lpcat2 <= 3 AND Ins2 <= 0 AND Col17a1 <= 0 AND Gc <= 0 AND Coro1a > 124 AND Cx3cr1 <= 71 AND Chga <= 0 AND Krt15 <= 1 AND Fcrls <= 0 AND C1qc > 0 AND Them5 <= 0 AND Cd79b <= 822 AND Krt5 <= 0 AND Tmem119 <= 2 AND Dmkn <= 0 AND P2ry12 <= 2 AND Cldn7 <= 0 AND Epcam <= 22 AND Cx3cr1 <= 1 AND Aqp3 <= 42 AND Ttr <= 0 AND Guca2a <= 0 AND Krt14 > 0 AND C1qb <…	Thymus
Rule525	Ptprcap > 3 AND Cela2a <= 0 AND Cd3e > 0 AND Lpcat2 <= 3 AND Ins2 <= 0 AND Col17a1 <= 0 AND Gc <= 0 AND Coro1a > 124 AND Cx3cr1 <= 71 AND Chga <= 0 AND Krt15 <= 1 AND Fcrls <= 0 AND Cd3g <= 323 AND Tcf7 > 1242 AND Ctsd > 34	Thymus
Rule526	Ptprcap > 3 AND Cela2a <= 0 AND Tmem119 <= 6 AND Lpcat2 <= 20 AND Cd3g <= 1 AND Cd8b1 <= 1 AND Cdhr5 <= 0 AND Epcam <= 3 AND Cd8a <= 1 AND Tmem27 <= 0 AND Cd3e <= 2 AND Mobp <= 1 AND Ctsd <= 579 AND Cx3cr1 <= 1 AND Cd79b > 320 AND Chga <= 1 AND Krt6a <= 0 AND Gc <= 0 AND Krt13 <= 0 AND Cd8a <= 0 AND Anxa8 <= 0 AND Krt14 <= 0 AND Prss2 > 0 AND Coro1a > 871	Lung
Rule527	Ptprcap > 3 AND Cela2a <= 0 AND Tmem119 <= 6 AND Lpcat2 <= 20 AND Cd3g <= 1 AND Cd8b1 <= 1 AND Cdhr5 <= 0 AND Epcam <= 3 AND Cd8a <= 1 AND Tmem27 <= 0 AND Cd3e <= 2 AND Mobp <= 1 AND Ctsd <= 579 AND Cx3cr1 <= 1 AND Cd79b > 320 AND Chga <= 1 AND Krt6a <= 0 AND Gc <= 0 AND Krt13 <= 0 AND Cd8a <= 0 AND Anxa8 <= 0 AND Krt14 <= 0 AND Krt15 <= 2 AND Krt17 <= 0 AND Fcrls <= 0 AND Lgals4 > 1 AND Laptm5 <…	Marrow
Rule528	Ptprcap > 3 AND Cela2a <= 0 AND Tmem119 <= 6 AND Lpcat2 <= 20 AND Cd3g <= 1 AND Cd8b1 <= 1 AND Cdhr5 <= 0 AND Epcam <= 3 AND Cd8a <= 1 AND Tmem27 <= 0 AND Cd3e <= 2 AND Mobp <= 1 AND Ctsd <= 579 AND Cx3cr1 <= 1 AND Cd79b > 320 AND Chga <= 1 AND Krt6a <= 0 AND Gc <= 0 AND Krt13 <= 0 AND Cd8a <= 0 AND Anxa8 <= 0 AND Lypd3 <= 0 AND Krt15 <= 2 AND Krt14 <= 0 AND Krt17 <= 0 AND Chga <= 0 AND Fcrls <= …	Marrow
Rule529	Ptprcap > 3 AND Cela2a <= 0 AND Tmem119 <= 6 AND Lpcat2 <= 20 AND Cd3g <= 1 AND Cd8b1 <= 1 AND Cdhr5 <= 0 AND Epcam <= 3 AND Cd8a <= 1 AND Tmem27 <= 0 AND Cd3e <= 2 AND Mobp <= 1 AND Ctsd <= 579 AND Cx3cr1 <= 1 AND Cd79b > 320 AND Chga <= 1 AND Krt6a <= 0 AND Gc <= 0 AND Krt13 <= 0 AND Cd8a <= 0 AND Anxa8 <= 0 AND Lypd3 <= 0 AND Krt15 <= 2 AND Krt14 <= 0 AND Krt17 <= 0 AND Chga <= 0 AND Fcrls <= …	Spleen
Rule530	Ptprcap > 3 AND Cela2a <= 0 AND Tmem119 <= 6 AND Lpcat2 <= 20 AND Cd3g <= 1 AND Cd8b1 <= 1 AND Cdhr5 <= 0 AND Epcam <= 3 AND Cd8a <= 1 AND Tmem27 <= 0 AND Cd3e <= 2 AND Ctsd <= 579 AND Mobp <= 1 AND Cx3cr1 <= 1 AND Cd79b > 320 AND Chga <= 1 AND Krt6a <= 0 AND Gc <= 0 AND Krt13 <= 0 AND Cd8a <= 0 AND Anxa8 <= 0 AND Lypd3 <= 0 AND Krt15 <= 2 AND Krt14 <= 0 AND Krt17 <= 0 AND Chga <= 0 AND Fcrls <= …	Spleen
Rule531	Foxf1a > 1 AND Pitx1 > 0 AND Krt5 <= 0 AND Trim29 <= 0 AND Calm4 <= 0 AND Krt17 <= 0 AND 2610528A11Rik <= 22	Bladder
Rule532	Foxf1a > 1 AND Fosl1 > 0 AND Krt13 <= 1 AND Chodl <= 95 AND Lypd3 <= 0 AND Dmkn <= 23 AND Mobp <= 0 AND Cx3cr1 <= 0 AND Krt17 <= 0 AND Rnase1 <= 3 AND Mbp <= 6 AND Ctsd > 7 AND P2ry12 <= 1 AND Fcrls <= 0 AND Tspan8 <= 1 AND Hexb <= 466 AND C1qa <= 0 AND C1qc <= 0 AND Oit1 <= 0 AND Ctrb1 <= 5 AND Dmbt1 <= 0 AND Guca2a <= 0 AND Trim29 <= 0 AND Klk1 <= 0 AND Gpr34 <= 0 AND Epcam <= 0 AND Lgmn > 1	Trachea
Rule533	Ptprcap > 3 AND Cela2a <= 0 AND Tmem119 <= 6 AND Cd3g <= 1 AND Perp <= 7 AND Cd8b1 <= 1 AND Cd8a <= 1 AND Gpr34 <= 51 AND Tmem27 > 0 AND Pigr <= 0 AND Pcsk1n > 0	Fat
Rule534	Ptprcap > 3 AND Cela2a <= 0 AND Tmem119 <= 6 AND Cd3g <= 1 AND Perp <= 7 AND Cd8b1 <= 1 AND Cd8a <= 1 AND Gpr34 <= 51 AND Gpx2 <= 0 AND Tmem27 > 0 AND Siglech > 0 AND C1qb <= 0	Fat
Rule535	Ptprcap > 3 AND Cela2a <= 0 AND Tmem119 <= 6 AND Cd3g <= 1 AND Perp <= 7 AND Cd8b1 <= 1 AND Cd8a <= 1 AND Gpr34 <= 51 AND Gpx2 <= 0 AND Tmem27 > 0 AND Siglech <= 0 AND Fcrls <= 0 AND Anxa8 <= 0 AND Pigr <= 0 AND Chga <= 0 AND Hexb <= 34 AND C1qc <= 1 AND Cd79b <= 89	Kidney
Rule536	Ptprcap > 3 AND Cela2a <= 0 AND Tmem119 <= 6 AND Cd3g <= 1 AND Perp <= 7 AND Cd8b1 <= 1 AND Cd8a <= 1 AND Gpr34 <= 51 AND Gpx2 <= 0 AND Cdhr5 <= 0 AND Lpcat2 <= 115 AND Epcam <= 1 AND Mobp <= 1 AND Ctsd <= 579 AND Cx3cr1 <= 1 AND Cd79b > 398 AND Tmem27 > 0 AND C1qc <= 1 AND P2ry12 <= 1	Marrow
Rule537	Ptprcap > 3 AND Cela2a <= 0 AND Tmem119 <= 6 AND Lpcat2 <= 20 AND Cd3g <= 1 AND Perp <= 8 AND Cd8b1 <= 1 AND Cdhr5 <= 0 AND Cd8a <= 1 AND Epcam <= 3 AND Cd3e <= 2 AND Mobp <= 1 AND Ctsd <= 579 AND Cx3cr1 <= 1 AND Krt19 > 1 AND Cd79b <= 581 AND Laptm5 <= 354	Lung
Rule538	Ptprcap > 3 AND Cela2a <= 0 AND Tmem119 <= 6 AND Lpcat2 <= 20 AND Cd3g <= 1 AND Perp <= 8 AND Cd8b1 <= 1 AND Cdhr5 <= 0 AND Cd8a <= 1 AND Epcam <= 3 AND Cd3e <= 2 AND Mobp <= 1 AND Ctsd <= 579 AND Cx3cr1 <= 1 AND Cd3d <= 0 AND Cd79b > 335 AND Chga <= 1 AND Krt6a <= 0 AND Gc <= 0 AND Cd8a <= 0 AND Krt15 <= 2 AND Anxa8 > 0 AND Pigr <= 0 AND Siglech <= 0 AND Anxa8 <= 1 AND P2ry12 <= 2 AND Ptprcap > …	Spleen
Rule539	Ptprcap > 3 AND Cela2a <= 0 AND Tmem119 <= 6 AND Lpcat2 <= 20 AND Cd3g <= 1 AND Perp <= 8 AND Cd8b1 <= 1 AND Cdhr5 <= 0 AND Cd8a <= 1 AND Epcam <= 3 AND Cd3e <= 2 AND Mobp <= 1 AND Oit1 <= 0 AND Klk1 > 0 AND Ckmt1 > 0 AND Hexb <= 1	Brain Neurons
Rule540	Ptprcap > 3 AND Cela2a <= 0 AND Tmem119 <= 6 AND Lpcat2 <= 20 AND Cd3g <= 1 AND Perp <= 8 AND Cd8b1 <= 1 AND Cdhr5 <= 0 AND Cd8a <= 1 AND Epcam <= 3 AND Cd3e <= 2 AND Mobp <= 1 AND Oit1 <= 0 AND Ctsd <= 579 AND Cx3cr1 <= 1 AND Cd3d <= 0 AND Cd79b > 337 AND Chga <= 1 AND Krt6a <= 0 AND Anxa8 <= 0 AND Krt15 <= 2 AND Gc <= 0 AND Cd8a <= 0 AND Krt13 <= 0 AND Lypd3 <= 0 AND Krt14 <= 0 AND C1qc > 1 AND…	Spleen
Rule541	Ptprcap > 3 AND Cela2a <= 0 AND Tmem119 <= 6 AND Cd3g <= 1 AND Perp <= 7 AND Cd8b1 <= 1 AND Cd8a <= 1 AND Gpr34 <= 51 AND Dmbt1 <= 0 AND Cdhr5 <= 0 AND Lpcat2 <= 115 AND Cdh1 <= 0 AND Epcam <= 3 AND Oit1 > 0 AND Trem2 <= 0 AND Chga <= 0 AND Col17a1 <= 0 AND Guca2a <= 0 AND Mbp <= 0	Marrow
Rule542	Ptprcap > 3 AND Cela2a <= 0 AND Tmem119 <= 6 AND Lpcat2 <= 20 AND Cd3g <= 1 AND Perp <= 8 AND Cd8b1 <= 1 AND Cdhr5 <= 0 AND Cd8a <= 1 AND Epcam <= 3 AND Cd3e <= 2 AND Mobp <= 1 AND Ctsd <= 579 AND Cx3cr1 <= 1 AND Cd3d <= 0 AND Cd79b > 335 AND Chga <= 1 AND Krt6a <= 0 AND Anxa8 <= 0 AND Krt15 <= 2 AND Gc <= 0 AND Cd8a <= 0 AND Krt13 <= 0 AND Lypd3 <= 0 AND Krt14 <= 0 AND C1qc > 1 AND Tmem27 <= 0 A…	Marrow
Rule543	Ptprcap > 3 AND Cela2a <= 0 AND Tmem119 <= 6 AND Lpcat2 <= 20 AND Cd3g <= 1 AND Perp <= 8 AND Cd8b1 <= 1 AND Cdhr5 <= 0 AND Cd8a <= 1 AND Epcam <= 3 AND Cd3e <= 2 AND Mobp <= 1 AND Ctsd <= 579 AND Cx3cr1 <= 1 AND Cd3d <= 0 AND Cd79b > 335 AND Chga <= 1 AND Gc <= 0 AND Krt6a <= 0 AND Cd8a <= 0 AND Anxa8 <= 0 AND Krt15 <= 2 AND Krt13 <= 0 AND Lypd3 <= 0 AND Krt14 <= 0 AND C1qc > 1 AND Tmem27 <= 0	Spleen
Rule544	Ptprcap > 3 AND Cela2a <= 0 AND Tmem119 <= 6 AND Lpcat2 <= 20 AND Cd3g <= 1 AND Perp <= 8 AND Cd8b1 <= 1 AND Cdhr5 <= 0 AND Cd8a <= 1 AND Epcam <= 3 AND Cd3e <= 2 AND Mobp <= 1 AND Ctsd <= 579 AND Cx3cr1 <= 1 AND Cd3d <= 0 AND Cd79b > 335 AND Chga <= 1 AND Gc <= 0 AND Krt6a <= 0 AND Cd8a <= 0 AND Anxa8 <= 0 AND Krt15 <= 2 AND Krt13 <= 0 AND Lypd3 <= 0 AND Krt14 <= 0 AND Krt17 <= 0 AND Fcrls <= 0 …	Marrow
Rule545	Ptprcap > 3 AND Cela2a <= 0 AND Tmem119 <= 6 AND Lpcat2 <= 20 AND Cd3g <= 1 AND Perp <= 8 AND Cd8b1 <= 1 AND Cdhr5 <= 0 AND Cd8a <= 1 AND Epcam <= 3 AND Cd3e <= 2 AND Mobp <= 1 AND Ctsd <= 579 AND Cx3cr1 <= 1 AND Cd3d <= 0 AND Cd79b > 335 AND Chga <= 1 AND Gc <= 0 AND Krt6a <= 0 AND Cd8a <= 0 AND Anxa8 <= 0 AND Krt15 <= 2 AND Krt13 <= 0 AND Lypd3 <= 0 AND Krt14 <= 0 AND Krt17 <= 0 AND Krt5 > 0 AN…	Spleen
Rule546	Ptprcap > 3 AND Cela2a <= 0 AND Tmem119 <= 6 AND Lpcat2 <= 20 AND Cd3g <= 1 AND Perp <= 8 AND Cd8b1 <= 1 AND Cdhr5 <= 0 AND Cd8a <= 1 AND Epcam <= 3 AND Cd3e <= 2 AND Mobp <= 1 AND Ctsd <= 579 AND Cx3cr1 <= 1 AND Cd3d <= 0 AND Cd79b > 335 AND Chga <= 1 AND Gc <= 0 AND Krt6a <= 0 AND Cd8a <= 0 AND Anxa8 <= 0 AND Krt15 <= 2 AND Krt14 <= 0 AND Krt5 <= 0 AND Krt17 <= 0 AND Chga <= 0 AND Tmem119 <= 1 …	Liver
Rule547	Ptprcap > 3 AND Cela2a <= 0 AND Tmem119 <= 6 AND Lpcat2 <= 20 AND Cd3g <= 1 AND Perp <= 8 AND Cd8b1 <= 1 AND Cdhr5 <= 0 AND Cd8a <= 1 AND Epcam <= 3 AND Cd3e <= 2 AND Mobp <= 1 AND Ctsd <= 579 AND Cx3cr1 <= 1 AND Cd3d <= 0 AND Cd79b > 335 AND Chga <= 1 AND Gc <= 0 AND Krt6a <= 0 AND Cd8a <= 0 AND Anxa8 <= 0 AND Krt15 <= 2 AND Krt14 <= 0 AND Krt5 <= 0 AND Krt17 <= 0 AND Chga <= 0 AND Tmem119 <= 1 …	Marrow
Rule548	Ptprcap > 3 AND Cela2a <= 0 AND Tmem119 <= 6 AND Lpcat2 <= 20 AND Cd3g <= 1 AND Perp <= 8 AND Cd8b1 <= 1 AND Cdhr5 <= 0 AND Cd8a <= 1 AND Epcam <= 3 AND Cd3e <= 2 AND Mobp <= 1 AND Ctsd <= 579 AND Cx3cr1 <= 1 AND Krt13 <= 0 AND Cd79b > 236 AND Chga <= 1 AND Cd8a <= 0 AND Anxa8 <= 0 AND Gc <= 0 AND Lypd3 <= 0 AND P2ry13 <= 0 AND C1qc <= 1 AND Krt8 > 1 AND Tmem119 <= 0 AND Krt8 <= 6 AND 2210415F13R…	Spleen
Rule549	Ptprcap > 3 AND Cela2a <= 0 AND Tmem119 <= 6 AND Lpcat2 <= 20 AND Cd3g <= 1 AND Perp <= 8 AND Cd8b1 <= 1 AND Cd8a <= 1 AND Cdhr5 <= 0 AND Epcam <= 3 AND Cd3e <= 2 AND Mobp <= 1 AND Ctsd <= 579 AND Cx3cr1 <= 1 AND Krt13 <= 0 AND Cd3d <= 0 AND Chga <= 0 AND Cd79b > 455 AND Gc <= 0 AND Anxa8 <= 0 AND Krt14 <= 0 AND Krt15 > 3 AND Ptprc <= 630 AND Ptprcap > 133	Spleen
Rule550	Ptprcap > 3 AND Cela2a <= 0 AND Tmem119 <= 6 AND Lpcat2 <= 20 AND Cd3g <= 1 AND Perp <= 8 AND Cd8b1 <= 1 AND Cd8a <= 1 AND Cdhr5 <= 0 AND Epcam <= 3 AND Cd3e <= 2 AND Mobp <= 1 AND Ctsd <= 579 AND Cx3cr1 <= 1 AND Krt13 <= 0 AND Cd3d <= 0 AND Chga <= 0 AND Krt15 <= 2 AND Anxa8 > 0 AND Ins2 <= 6 AND Pigr <= 0 AND Epcam <= 0 AND Ttr <= 0 AND Klk1 <= 1 AND Lgals7 <= 0 AND Cx3cr1 <= 0 AND Laptm5 <= 23…	Marrow
Rule551	Ptprcap > 3 AND Cela2a <= 0 AND Tmem119 <= 6 AND Lpcat2 <= 20 AND Cd3g <= 1 AND Perp <= 8 AND Cd8b1 <= 1 AND Cd8a <= 1 AND Cdhr5 <= 0 AND Epcam <= 3 AND Cd3e <= 2 AND Mobp <= 1 AND Ctsd <= 579 AND Cx3cr1 <= 1 AND Krt13 <= 0 AND Cd3d <= 0 AND Chga <= 0 AND Krt15 <= 2 AND Anxa8 > 0 AND Ins2 <= 6 AND Pigr <= 0 AND Epcam <= 0 AND Klk1 <= 1 AND Ttr <= 0 AND Mbp <= 0 AND Tmem119 <= 0 AND Hexb > 1	Fat
Rule552	Ptprcap > 3 AND Cela2a <= 0 AND Tmem119 <= 6 AND Lpcat2 <= 20 AND Cd3g <= 1 AND Perp <= 8 AND Cd8b1 <= 1 AND Cdhr5 <= 0 AND Cd8a <= 1 AND Epcam <= 3 AND Cd3e <= 2 AND Mobp <= 1 AND Ctsd <= 579 AND Cx3cr1 <= 1 AND Krt13 <= 0 AND Cd3d <= 0 AND Chga <= 0 AND Krt15 <= 2 AND Cd79b > 453 AND Gc <= 0 AND Krt14 <= 0 AND Krt5 <= 0 AND Cd8a <= 0 AND Krt17 <= 0 AND Tmem119 <= 1 AND Cx3cr1 <= 0 AND C1qb <= 0…	Spleen
Rule553	Ptprcap > 3 AND Cela2a <= 0 AND Tmem119 <= 6 AND Lpcat2 <= 20 AND Cd3g <= 1 AND Perp <= 8 AND Cd8b1 <= 1 AND Cd8a <= 1 AND Cdhr5 <= 0 AND Epcam <= 3 AND Cd3e <= 2 AND Mobp <= 1 AND Ctsd <= 579 AND Cx3cr1 <= 1 AND Krt13 <= 0 AND Cd3d <= 0 AND Chga <= 0 AND Krt15 <= 2 AND Cd79b > 453 AND Gc <= 0 AND Krt14 <= 0 AND Krt5 <= 0 AND Krt17 <= 0 AND Cd8a <= 0 AND Fcrls <= 0 AND Tmem119 <= 1 AND C1qb <= 0 …	Marrow
Rule554	Ptprcap > 3 AND Cela2a <= 0 AND Tmem119 <= 6 AND Lpcat2 <= 20 AND Cd3g <= 1 AND Perp <= 8 AND Cd8b1 <= 1 AND Cdhr5 <= 0 AND Cd8a <= 1 AND Epcam <= 3 AND Cd3e <= 2 AND Mobp <= 1 AND Ctsd <= 579 AND Cx3cr1 <= 1 AND Cd3d <= 0 AND Krt13 <= 0 AND Chga <= 0 AND Krt15 <= 2 AND Cd79b > 453 AND Gc <= 0 AND Krt14 <= 0 AND Krt5 <= 0 AND Krt17 <= 0 AND Cd8a <= 0 AND Fcrls <= 0 AND Tmem119 <= 1 AND C1qb <= 0 …	Spleen
Rule555	Ptprcap > 3 AND Cela2a <= 0 AND Tmem119 <= 6 AND Lpcat2 <= 20 AND Cd3g <= 1 AND Perp <= 8 AND Cd8b1 <= 1 AND Cd8a <= 1 AND Cdhr5 <= 0 AND Epcam <= 3 AND Cd3e <= 2 AND Mobp <= 1 AND Ctsd <= 579 AND Cx3cr1 <= 1 AND Cd3d <= 0 AND Krt13 <= 0 AND Chga <= 0 AND Krt15 <= 2 AND Cd79b > 453 AND Gc <= 0 AND Krt14 <= 0 AND Krt5 <= 0 AND Krt17 <= 0 AND Cd8a <= 0 AND Fcrls <= 0 AND Tmem119 <= 1 AND C1qb <= 0 …	Spleen
Rule556	Ptprcap > 3 AND Cela2a <= 0 AND Tmem119 <= 6 AND Lpcat2 <= 20 AND Cd3g <= 1 AND Perp <= 8 AND Cd8b1 <= 1 AND Cd8a <= 1 AND Cdhr5 <= 0 AND Epcam <= 3 AND Cd3e <= 2 AND Mobp <= 1 AND Ctsd <= 579 AND Cx3cr1 <= 1 AND Cd3d <= 0 AND Krt13 <= 0 AND Chga <= 0 AND Krt15 <= 2 AND Cd79b > 453 AND Gc <= 0 AND Krt14 <= 0 AND Krt5 <= 0 AND Krt17 <= 0 AND Cd8a <= 0 AND Fcrls <= 0 AND Tmem119 <= 1 AND C1qb <= 0 …	Marrow
Rule557	Ptprcap > 3 AND Cela2a <= 0 AND Tmem119 <= 6 AND Lpcat2 <= 20 AND Cd3g <= 1 AND Perp <= 8 AND Cd8b1 <= 1 AND Cd8a <= 1 AND Cdhr5 <= 0 AND Epcam <= 3 AND Cd3e <= 2 AND Mobp <= 1 AND Ctsd <= 579 AND Cx3cr1 <= 1 AND Cd3d <= 0 AND Krt13 <= 0 AND Chga <= 0 AND Krt15 <= 2 AND Cd79b > 453 AND Gc <= 0 AND Krt14 <= 0 AND Krt5 <= 0 AND Krt17 <= 0 AND Cd8a <= 0 AND Fcrls <= 0 AND Tmem119 <= 1 AND C1qb <= 0 …	Spleen
Rule558	Ptprcap > 3 AND Cela2a <= 0 AND Tmem119 <= 6 AND Lpcat2 <= 20 AND Cd3g > 1 AND Ins2 <= 0 AND Chga <= 0 AND Col17a1 > 1 AND Pigr <= 9	Trachea
Rule559	Ptprcap > 3 AND Cela2a <= 0 AND Tmem119 <= 6 AND Lpcat2 <= 20 AND Cd3g > 1 AND Ins2 <= 0 AND Chga <= 0 AND Gc <= 0 AND Lpcat2 <= 2 AND Coro1a > 200 AND Cx3cr1 <= 87 AND Krt15 <= 1 AND Fcrls <= 0 AND Cd3g <= 323 AND Pnlip > 0	Thymus
Rule560	Ptprcap > 3 AND Cela2a <= 0 AND Tmem119 <= 6 AND Lpcat2 <= 20 AND Cd3g > 1 AND Ins2 <= 0 AND Chga <= 0 AND Gc <= 0 AND Lpcat2 <= 2 AND Coro1a > 200 AND Cx3cr1 <= 87 AND Krt15 <= 1 AND Fcrls <= 0 AND Cd3g <= 323 AND Krt6a <= 0 AND Dmkn <= 0 AND Anxa8 > 0 AND P2ry12 <= 0	Spleen
Rule561	Ptprcap > 3 AND Cela2a <= 0 AND Tmem119 <= 6 AND Lpcat2 <= 20 AND Cd3g > 1 AND Ins2 <= 0 AND Chga <= 0 AND Gc <= 0 AND Lpcat2 <= 2 AND Coro1a > 200 AND Cx3cr1 <= 87 AND Krt15 <= 1 AND Fcrls <= 0 AND Cd3g <= 323 AND Krt6a <= 0 AND Dmkn <= 0 AND Ccr9 <= 1 AND Gpr34 > 68 AND Cd3e <= 42	Thymus
Rule562	Ptprcap > 3 AND Cela2a <= 0 AND Tmem119 <= 6 AND Lpcat2 <= 20 AND Cd3g > 1 AND Ins2 <= 0 AND Chga <= 0 AND Gc <= 0 AND Lpcat2 <= 2 AND Coro1a > 200 AND Cx3cr1 <= 87 AND Krt15 <= 1 AND Fcrls <= 0 AND Cd3g <= 323 AND Krt6a <= 0 AND Dmkn <= 0 AND Ccr9 <= 1 AND Ptprc > 2 AND C1qc <= 1 AND Ptprcap <= 826 AND Anxa8 > 0	Muscle
Rule563	Ptprcap > 3 AND Cela2a <= 0 AND Tmem119 <= 6 AND Lpcat2 <= 20 AND Cd3g > 1 AND Ins2 <= 0 AND Chga <= 0 AND Gc <= 0 AND Lpcat2 <= 2 AND Coro1a > 200 AND Cx3cr1 <= 87 AND Krt15 <= 1 AND Fcrls <= 0 AND Cd3g <= 323 AND Krt6a <= 0 AND Dmkn <= 0 AND Ccr9 <= 1 AND Ptprc > 2 AND C1qc <= 1 AND Ptprcap <= 826 AND Tmem119 <= 0 AND C1qa <= 0 AND Mobp <= 1 AND Trim29 <= 0 AND Krt5 <= 0 AND Perp <= 0 AND Fxyd3…	Marrow
Rule564	Ptprcap > 3 AND Cela2a <= 0 AND Tmem119 <= 6 AND Lpcat2 <= 20 AND Cd3g > 1 AND Ins2 <= 0 AND Chga <= 0 AND Gc <= 0 AND Lpcat2 <= 2 AND Coro1a > 200 AND Cx3cr1 <= 87 AND Krt15 <= 1 AND Fcrls <= 0 AND Cd3g <= 323 AND Krt6a <= 0 AND Dmkn <= 0 AND Ccr9 <= 1 AND Ptprc > 2 AND C1qc <= 1 AND Ptprcap <= 826 AND Tmem119 <= 0 AND C1qa <= 0 AND Mobp <= 1 AND Trim29 <= 0 AND Krt5 <= 0 AND Perp <= 0 AND Tspan…	Spleen
Rule565	Ptprcap > 3 AND Cela2a <= 0 AND Tmem119 <= 6 AND Lpcat2 <= 20 AND Cd3g <= 1 AND Perp <= 8 AND Cd8b1 <= 1 AND Cd8a <= 1 AND Cdhr5 <= 0 AND Epcam <= 3 AND Cd3e <= 2 AND Mobp <= 1 AND Ctsd <= 579 AND Cx3cr1 <= 1 AND Cd3d <= 0 AND Krt13 <= 0 AND Chga <= 0 AND Krt15 <= 2 AND Ttr <= 0 AND Cd79b > 453 AND Gc <= 0 AND Krt14 <= 0 AND Krt5 <= 0 AND Krt17 <= 0 AND Cd8a <= 0 AND Fcrls <= 0 AND C1qa > 0 AND T…	Spleen
Rule566	Klk1 > 3 AND Krt19 <= 1 AND Cela3b <= 4 AND Rac2 <= 3 AND Siglech <= 3 AND Fosl1 <= 0 AND Oit1 <= 0 AND Dsg3 <= 3 AND Pcsk1n <= 0 AND Tmem119 <= 7 AND Cd79b <= 0 AND Hpgds <= 0 AND Lgals4 <= 0	Kidney
Rule567	Lgals7 > 85 AND Cd3d <= 58 AND Krt5 > 1 AND Gpx2 <= 1272 AND Fosl1 <= 694 AND Anxa8 > 1 AND Pitx1 <= 5 AND Pigr <= 1 AND Tspan1 <= 1 AND Sfn <= 7047 AND Rnase1 <= 1 AND Krt13 <= 108	Skin
Rule568	Ptprcap > 3 AND Cela2a <= 0 AND Tmem119 <= 6 AND Lpcat2 <= 20 AND Cd3g <= 1 AND Perp <= 8 AND Cd8b1 <= 1 AND Cd8a <= 1 AND Cdhr5 <= 0 AND Epcam <= 3 AND Cd3e <= 2 AND Mobp <= 1 AND Ctsd <= 579 AND Cx3cr1 <= 1 AND Cd3d <= 0 AND Krt13 <= 0 AND Chga <= 0 AND Krt15 <= 2 AND Ttr <= 0 AND Cd79b > 453 AND Gc <= 0 AND Krt14 <= 0 AND Krt5 <= 0 AND C1qa > 0 AND Tmem27 <= 0 AND Krt15 <= 0 AND P2ry12 <= 0	Marrow
Rule569	Ptprcap > 3 AND Cela2a <= 0 AND Tmem119 <= 6 AND Lpcat2 <= 20 AND Cd3g <= 1 AND Perp <= 8 AND Cd8b1 <= 1 AND Cd8a <= 1 AND Cdhr5 <= 0 AND Epcam <= 3 AND Cd3e <= 2 AND Mobp <= 1 AND Ctsd <= 579 AND Cx3cr1 <= 1 AND Cd3d <= 0 AND Krt13 <= 0 AND Chga <= 0 AND Krt15 <= 2 AND Ttr <= 0 AND Cd79b > 453 AND Gc <= 0 AND C1qb <= 0 AND Trem2 > 0 AND Krt17 <= 0	Fat
Rule570	Ptprcap > 3 AND Cela2a <= 0 AND Tmem119 <= 6 AND Lpcat2 <= 20 AND Cd3g <= 1 AND Perp <= 8 AND Cd8b1 <= 1 AND Cd8a <= 1 AND Cdhr5 <= 0 AND Epcam <= 3 AND Cd3e <= 2 AND Mobp <= 1 AND Ctsd <= 579 AND Cx3cr1 <= 1 AND Cd3d <= 0 AND Krt13 <= 0 AND Chga <= 0 AND Krt15 <= 2 AND Ttr <= 0 AND Cd79b > 453 AND Gc <= 0 AND C1qb <= 0 AND Anxa8 <= 0 AND Fcrls <= 0 AND Gpr34 <= 0 AND P2ry13 <= 0 AND Cd8a <= 0 AN…	Spleen
Rule571	Ptprcap > 3 AND Cela2a <= 0 AND Tmem119 <= 6 AND Lpcat2 <= 20 AND Cd3g <= 1 AND Perp <= 8 AND Cd8b1 <= 1 AND Cd8a <= 1 AND Cdhr5 <= 0 AND Epcam <= 3 AND Cd3e <= 2 AND Mobp <= 1 AND Ctsd <= 579 AND Cx3cr1 <= 1 AND Cd3d <= 0 AND Krt13 <= 0 AND Chga <= 0 AND Krt15 <= 2 AND Ttr <= 0 AND Cd79b > 453 AND Gc <= 0 AND C1qb <= 0 AND Anxa8 <= 0 AND Fcrls <= 0 AND Gpr34 <= 0 AND P2ry13 <= 0 AND Cd8a <= 0 AN…	Spleen
Rule572	Ptprcap > 3 AND Cela2a <= 0 AND Tmem119 <= 6 AND Lpcat2 <= 20 AND Cd3g <= 1 AND Perp <= 8 AND Cd8b1 <= 1 AND Cd8a <= 1 AND Cdhr5 <= 0 AND Epcam <= 3 AND Cd3e <= 2 AND Mobp <= 1 AND Ctsd <= 579 AND Cx3cr1 <= 1 AND Cd3d > 0 AND Dmkn <= 0 AND Epcam <= 0 AND Myb <= 28 AND Slc2a5 <= 1 AND Hexb <= 147 AND Gpr34 <= 0 AND Ccr9 <= 0 AND Coro1a <= 258	Muscle
Rule573	Ptprcap > 3 AND Cela2a <= 0 AND Tmem119 <= 6 AND Lpcat2 <= 20 AND Cd3g <= 1 AND Perp <= 8 AND Cd3d > 95 AND P2ry12 > 0 AND Hexb <= 8	Liver
Rule574	Ptprcap > 3 AND Cela2a <= 0 AND Tmem119 <= 6 AND Lpcat2 <= 20 AND Cd3g <= 1 AND Perp <= 8 AND Cd3d > 95 AND P2ry12 <= 0 AND Perp <= 0 AND Gc <= 0 AND 1190003J15Rik <= 0 AND Tcf7 <= 760 AND Rac2 > 91	Fat
Rule575	Ptprcap > 3 AND Cela2a <= 0 AND Tmem119 <= 6 AND Lpcat2 <= 20 AND Cd3g <= 1 AND Cd3e > 26 AND P2ry12 <= 0 AND Lpcat2 <= 4 AND Tcf7 > 7	Thymus
Rule576	Ptprcap > 3 AND Cela2a <= 0 AND Tmem119 <= 6 AND Lpcat2 <= 20 AND Cd3g <= 1 AND Perp <= 8 AND Cd8b1 <= 1 AND Cdhr5 <= 0 AND Cd8a <= 1 AND Epcam <= 3 AND Mobp <= 1 AND Cd79b > 8 AND Tcf7 > 0 AND Sfn > 0 AND Asb5 <= 0 AND Cd79b <= 1187	Muscle
Rule577	Ptprcap > 3 AND Cela2a <= 0 AND Tmem119 <= 6 AND Lpcat2 <= 20 AND Cd3g <= 1 AND Perp <= 8 AND Cd8b1 <= 1 AND Cdhr5 <= 0 AND Cd8a <= 1 AND Epcam <= 3 AND Mobp <= 1 AND Cd79b > 8 AND Krt13 <= 0 AND Cd79b <= 296 AND Oit1 <= 0 AND Trem2 <= 2 AND Tm4sf4 <= 0 AND Tmem45b <= 0 AND Tcf7 <= 2 AND Myb > 0	Marrow
Rule578	Ptprcap > 3 AND Cela2a <= 0 AND Tmem119 <= 6 AND Lpcat2 <= 20 AND Cd3g <= 1 AND Perp <= 8 AND Cd8b1 <= 1 AND Cdhr5 <= 0 AND Cd8a <= 1 AND Epcam <= 3 AND Mobp <= 1 AND Cd79b > 8 AND Krt13 <= 0 AND Cd79b <= 296 AND Oit1 <= 0 AND Trem2 <= 2 AND Tm4sf4 <= 0 AND Tmem45b <= 0 AND Tcf7 > 2	Marrow
Rule579	Ptprcap > 3 AND Cela2a <= 0 AND Tmem119 <= 6 AND Lpcat2 <= 20 AND Cd3g <= 1 AND Perp <= 8 AND Cd8b1 <= 1 AND Cdhr5 <= 0 AND Cd8a <= 1 AND Epcam <= 3 AND Cd3e <= 0 AND Mobp <= 1 AND Cd79b > 8 AND Krt13 <= 0 AND Cd79b <= 296 AND Oit1 <= 0 AND Trem2 <= 2 AND Tm4sf4 <= 0 AND Tmem45b <= 0 AND Resp18 > 0 AND Ttr <= 0	Muscle
Rule580	Ptprcap > 3 AND Cela2a <= 0 AND Tmem119 <= 6 AND Lpcat2 <= 20 AND Cd3g <= 1 AND Perp <= 8 AND Cd8b1 <= 1 AND Cdhr5 <= 0 AND Cd8a <= 1 AND Epcam <= 3 AND Cd3e <= 0 AND Mobp <= 1 AND Cd79b > 8 AND Krt13 <= 0 AND Cd79b <= 296 AND Oit1 <= 0 AND Trem2 <= 2 AND Tm4sf4 <= 0 AND Tmem45b <= 0 AND Gc > 0 AND Csf1r <= 0 AND Hexb <= 4	Spleen
Rule581	Ptprcap > 3 AND Cela2a <= 0 AND Tmem119 <= 6 AND Lpcat2 <= 20 AND Cd3g <= 1 AND Perp <= 8 AND Cd8b1 <= 1 AND Cdhr5 <= 0 AND Cd8a <= 1 AND Epcam <= 3 AND Mobp <= 1 AND Cd3e <= 0 AND Cd79b > 8 AND Krt13 <= 0 AND Cd79b <= 296 AND Gc > 0 AND Ctsd <= 0	Marrow
Rule582	Ptprcap > 3 AND Cela2a <= 0 AND Tmem119 <= 6 AND Lpcat2 <= 20 AND Cd3g <= 1 AND Perp <= 8 AND Cd8b1 <= 1 AND Cdhr5 <= 0 AND Cd8a <= 1 AND Epcam <= 3 AND Mobp <= 1 AND Cd3e <= 0 AND Cd79b > 8 AND Krt13 <= 0 AND Cd79b <= 296 AND Oit1 <= 0 AND Trem2 <= 2 AND Tm4sf4 <= 0 AND Tmem45b <= 0 AND Ttr <= 0 AND Mbp <= 5 AND Tspan8 > 0 AND Ptprcap <= 117	Marrow
Rule583	Ptprcap > 3 AND Cela2a <= 0 AND Tmem119 <= 6 AND Lpcat2 <= 20 AND Cd3g <= 1 AND Perp <= 8 AND Cd8b1 <= 1 AND Cdhr5 <= 0 AND Cd8a <= 1 AND Epcam <= 3 AND Mobp <= 1 AND Cd3e <= 0 AND Cd79b > 8 AND Krt13 <= 0 AND Cd79b <= 296 AND Oit1 <= 0 AND Trem2 <= 2 AND Tm4sf4 <= 0 AND Tmem45b <= 0 AND Ttr <= 0 AND Mbp <= 5 AND Mobp > 0 AND Mbp > 0	Spleen
Rule584	Ptprcap > 3 AND Cela2a <= 0 AND Tmem119 <= 6 AND Lpcat2 <= 20 AND Cd3g <= 1 AND Perp <= 8 AND Cd8b1 <= 1 AND Cdhr5 <= 0 AND Cd8a <= 1 AND Epcam <= 3 AND Mobp <= 1 AND Cd3e <= 0 AND Cd79b > 8 AND Krt13 <= 0 AND Cd79b <= 296 AND Oit1 <= 0 AND Trem2 <= 2 AND Tm4sf4 <= 0 AND Tmem45b <= 0 AND Mobp <= 0 AND Ttr <= 0 AND Mbp <= 5 AND Chga > 0 AND Fcrls <= 0 AND Krt15 <= 1 AND Guca2a <= 0 AND Coro1a > 41	Fat
Rule585	Ptprcap > 3 AND Cela2a <= 0 AND Tmem119 <= 6 AND Lpcat2 <= 20 AND Cd3g <= 1 AND Perp <= 8 AND Cd8b1 <= 1 AND Cdhr5 <= 0 AND Cd8a <= 1 AND Epcam <= 3 AND Mobp <= 1 AND Cd3e <= 0 AND Cd79b > 8 AND Chga <= 1 AND Cx3cr1 <= 1 AND Krt13 <= 0 AND Cd79b > 409 AND Krt15 <= 3 AND Gc <= 0 AND Lypd3 > 0 AND Gpr34 <= 0	Marrow
Rule586	Ptprcap > 3 AND Cela2a <= 0 AND Tmem119 <= 6 AND Lpcat2 <= 20 AND Cd3g <= 1 AND Perp <= 8 AND Cd8b1 <= 1 AND Cdhr5 <= 0 AND Epcam <= 3 AND Cd8a <= 1 AND Mobp <= 1 AND Cd3e <= 0 AND Cd79b > 8 AND Chga <= 1 AND Cx3cr1 <= 1 AND Krt13 <= 0 AND Cd79b > 409 AND Krt15 <= 3 AND Gc <= 0 AND Anxa8 <= 0 AND Ttr <= 0 AND Cd8a <= 0 AND Rac2 > 13 AND Csf1r <= 1 AND Krt15 <= 1 AND Fcrls <= 0 AND P2ry13 <= 0 AND…	Marrow
Rule587	Ptprcap > 3 AND Cela2a <= 0 AND Tmem119 <= 6 AND Lpcat2 <= 20 AND Cd3g <= 1 AND Perp <= 8 AND Cd8b1 <= 1 AND Cdhr5 <= 0 AND Epcam <= 3 AND Cd8a <= 1 AND Mobp <= 1 AND Cd3e <= 0 AND Cd79b > 8 AND Chga <= 1 AND Cx3cr1 <= 1 AND Krt13 <= 0 AND Cd79b > 409 AND Krt15 <= 3 AND Gc <= 0 AND Anxa8 <= 0 AND Ttr <= 0 AND Cd8a <= 0 AND Rac2 > 13 AND Csf1r <= 1 AND Krt15 <= 1 AND Fcrls <= 0 AND P2ry13 <= 0 AND…	Spleen
Rule588	Ptprcap > 3 AND Cela2a <= 0 AND Tmem119 <= 6 AND Lpcat2 <= 20 AND Cd3g <= 1 AND Perp <= 8 AND Cd8b1 <= 1 AND Cdhr5 <= 0 AND Epcam <= 3 AND Cd8a <= 1 AND Mobp <= 1 AND Cd3e <= 0 AND Cd79b > 8 AND Chga <= 1 AND Cx3cr1 <= 1 AND Krt13 <= 0 AND Cd79b > 409 AND Krt15 <= 3 AND Gc <= 0 AND Anxa8 <= 0 AND Ttr <= 0 AND Cd8a <= 0 AND Rac2 > 13 AND Csf1r <= 1 AND Krt15 <= 1 AND Fcrls <= 0 AND P2ry13 <= 0 AND…	Spleen
Rule589	Ptprcap > 8 AND Cela2a <= 0 AND Cd3g <= 1 AND Tmem119 <= 7 AND Perp > 7 AND Ccr9 <= 15 AND Asb5 <= 22 AND Trp63 <= 20 AND Lgmn <= 54 AND Laptm5 <= 1355	Marrow
Rule590	Ptprcap > 8 AND Cela2a <= 0 AND Cd3g <= 1 AND Perp > 10 AND Lgals4 <= 5 AND Cd8b1 <= 18 AND Dsc3 > 37	Thymus
Rule591	Ptprcap > 8 AND Cela2a <= 0 AND Cd3g <= 1 AND Tmem119 <= 7 AND Gpr34 <= 112 AND Cd8b1 <= 3 AND Lpcat2 <= 115 AND Mobp > 1 AND Clca2 <= 0 AND Fcrls > 0 AND Laptm5 <= 71	Marrow
Rule592	Ptprcap > 8 AND Cela2a <= 0 AND Cd3g <= 1 AND Tmem119 <= 7 AND Gpr34 <= 112 AND Cd8b1 <= 3 AND Lpcat2 <= 115 AND Mobp > 1 AND Fcrls <= 0 AND Clca2 <= 0 AND Mbp > 12 AND Ptprcap <= 1073	Spleen
Rule593	Ptprcap > 8 AND Cela2a <= 0 AND Tmem119 <= 6 AND Cd3g <= 1 AND Gpr34 <= 112 AND Cd8b1 <= 3 AND Mobp > 1 AND Fcrls <= 0 AND Clca2 <= 0 AND 2210415F13Rik <= 0 AND Mbp <= 12 AND Rac2 > 199	Marrow
Rule594	Ptprcap > 8 AND Cela2a <= 0 AND Tmem119 <= 6 AND Cd3g <= 1 AND Gpr34 <= 112 AND Cd8b1 <= 3 AND Mobp > 1 AND Fcrls <= 0 AND Krt15 <= 0 AND Clca2 <= 0 AND 2210415F13Rik <= 0	Liver
Rule595	Ptprcap > 8 AND Cela2a <= 0 AND Tmem119 <= 6 AND Cd3g <= 1 AND Gpr34 <= 112 AND Cd8b1 <= 3 AND Lpcat2 <= 115 AND Epcam <= 3 AND Chga <= 1 AND Cd3d > 44 AND Cd3e <= 25 AND Tcf7 <= 50	Marrow
Rule596	Ptprcap > 8 AND Cela2a <= 0 AND Tmem119 <= 6 AND Cd3g <= 1 AND Gpr34 <= 112 AND Cd3d > 73 AND P2ry12 <= 0 AND Tmem119 > 0	Kidney
Rule597	Ptprcap > 8 AND Cela2a <= 0 AND Tmem119 <= 6 AND Cd3g <= 1 AND Gpr34 <= 112 AND Cd8b1 <= 3 AND Lpcat2 <= 115 AND Epcam <= 3 AND Chga <= 1 AND Cd8a <= 0 AND Cd79b > 1 AND Krt13 <= 0 AND Cx3cr1 <= 1 AND Anxa8 > 0 AND Mobp <= 0 AND Cd3d <= 0 AND Pigr <= 4 AND Sfn <= 4 AND Hexb <= 103 AND Them5 <= 0 AND Aqp3 <= 0 AND Pigr <= 0 AND Krt8 <= 0 AND Ctsd > 0	Spleen
Rule598	Ptprcap > 8 AND Cela2a <= 0 AND Tmem119 <= 6 AND Cd3g <= 1 AND Gpr34 <= 112 AND Cd8b1 <= 3 AND Lpcat2 <= 115 AND Epcam <= 3 AND Chga <= 1 AND Cd8a <= 0 AND Cd79b > 11 AND Anxa8 <= 0 AND Krt15 <= 2 AND Cd79b <= 359 AND Oit1 <= 0 AND Tmem45b <= 0 AND Gc > 0 AND Coro1a > 346	Spleen
Rule599	Ptprcap > 8 AND Cela2a <= 0 AND Tmem119 <= 6 AND Cd3g <= 1 AND Cd8b1 <= 3 AND Gpr34 <= 112 AND Lpcat2 <= 115 AND Epcam <= 3 AND Chga <= 1 AND Cd8a <= 0 AND Cd79b > 11 AND Anxa8 <= 0 AND Krt15 <= 2 AND Gc <= 0 AND Krt6a <= 0 AND Cd79b <= 369 AND Oit1 <= 0 AND Tmem45b <= 0 AND Dmkn > 0 AND Rac2 <= 523	Muscle
Rule600	Ptprcap > 8 AND Cela2a <= 0 AND Tmem119 <= 6 AND Cd3g <= 1 AND Gpr34 <= 112 AND Cd8b1 <= 3 AND Lpcat2 <= 115 AND Epcam <= 3 AND Chga <= 1 AND Cd8a <= 0 AND Cd79b > 11 AND Anxa8 <= 0 AND Krt15 <= 2 AND Gc <= 0 AND Krt6a <= 0 AND Cd79b <= 369 AND Oit1 <= 0 AND Tmem45b <= 0 AND Dmkn > 0	Marrow
Rule601	Ptprcap > 8 AND Cela2a <= 0 AND Tmem119 <= 6 AND Cd3g <= 1 AND Cd8b1 <= 3 AND Gpr34 <= 112 AND Lpcat2 <= 115 AND Epcam <= 3 AND Chga <= 1 AND Cd8a <= 0 AND Cd79b > 11 AND Anxa8 <= 0 AND Krt15 <= 2 AND Gc <= 0 AND Krt6a <= 0 AND Cd79b <= 369 AND Oit1 <= 0 AND Tmem45b > 0	Marrow
Rule602	Ptprcap > 8 AND Cela2a <= 0 AND Tmem119 <= 6 AND Cd3g <= 1 AND Cd8b1 <= 3 AND Gpr34 <= 112 AND Lpcat2 <= 115 AND Epcam <= 3 AND Chga <= 1 AND Cd8a <= 0 AND Cd79b > 11 AND Anxa8 <= 0 AND Cd79b <= 363 AND Oit1 > 0	Brain Neurons
Rule603	Ptprcap > 8 AND Cela2a <= 0 AND Tmem119 <= 6 AND Cd3g <= 1 AND Cd8b1 <= 3 AND Gpr34 <= 112 AND Lpcat2 <= 115 AND Epcam <= 3 AND Asb5 > 0 AND Lgals4 <= 5 AND P2ry12 <= 1 AND Rac2 > 188	Fat
Rule604	Ptprcap > 8 AND Cela2a <= 0 AND Tmem119 <= 6 AND Cd3g <= 1 AND Gpr34 <= 112 AND Cd8b1 <= 3 AND Lpcat2 <= 115 AND Epcam <= 3 AND Chga <= 1 AND Cd8a <= 0 AND Cd79b > 11 AND Anxa8 <= 0 AND Cd79b <= 363 AND Ttr <= 0 AND Mbp <= 9 AND Klk1 > 2 AND Krt14 <= 0	Kidney
Rule605	Ptprcap > 8 AND Cela2a <= 0 AND Tmem119 <= 6 AND Cd3g <= 1 AND Gpr34 <= 112 AND Cd8b1 <= 3 AND Lpcat2 <= 115 AND Epcam <= 3 AND Chga <= 1 AND Cd8a <= 0 AND Cd79b > 11 AND Anxa8 <= 0 AND Cd79b <= 363 AND Cdh1 <= 0 AND Ttr <= 0 AND Mbp <= 9 AND Mobp > 0 AND C1qc <= 0	Marrow
Rule606	Ptprcap > 8 AND Cela2a <= 0 AND Tmem119 <= 6 AND Cd3g <= 1 AND Gpr34 <= 112 AND Cd8b1 <= 3 AND Lpcat2 <= 115 AND Epcam <= 3 AND Chga <= 1 AND Cd8a <= 0 AND Cd79b > 11 AND Anxa8 <= 0 AND Cd79b <= 363 AND Cdh1 <= 0 AND Ttr <= 0 AND Mbp <= 9 AND Ptprc > 229 AND Cx3cr1 <= 0 AND Perp <= 0 AND Coro1a > 69 AND Siglech <= 0 AND Krt19 <= 0 AND P2ry12 <= 0 AND Krt8 <= 0 AND Krt14 <= 0 AND Epcam <= 0 AND Fc…	Spleen
Rule607	Ptprcap > 8 AND Cela2a <= 0 AND Tmem119 <= 6 AND Cd3g <= 1 AND Gpr34 <= 112 AND Cd8b1 <= 3 AND Lpcat2 <= 115 AND Epcam <= 3 AND Chga <= 1 AND Cd8a <= 0 AND Cd79b > 11 AND Anxa8 <= 0 AND Cd79b <= 369 AND Gc <= 0 AND Cdh1 <= 0 AND Ttr <= 0 AND Mbp <= 9 AND Tspan8 <= 0 AND Cx3cr1 <= 0 AND Krt14 > 2	Muscle
Rule608	Ptprcap > 8 AND Cela2a <= 0 AND Tmem119 <= 6 AND Cd3g <= 1 AND Gpr34 <= 112 AND Cd8b1 <= 3 AND Lpcat2 <= 115 AND Epcam <= 3 AND Chga <= 1 AND Cd8a <= 0 AND Cd79b > 11 AND Anxa8 <= 0 AND Cd79b <= 369 AND Gc <= 0 AND Cdh1 <= 0 AND Ttr <= 0 AND Mbp <= 9 AND Tspan8 > 0	Spleen
Rule609	Ptprcap > 8 AND Cela2a <= 0 AND Tmem119 <= 6 AND Cd3g <= 1 AND Gpr34 <= 112 AND Cd8b1 <= 3 AND Lpcat2 <= 115 AND Epcam <= 3 AND Chga <= 1 AND Cd8a <= 0 AND Cd79b > 11 AND Anxa8 <= 0 AND Cd79b <= 369 AND Gc <= 0 AND Cdh1 <= 0 AND Ttr <= 0 AND Mbp <= 9 AND Cx3cr1 <= 0 AND Siglech > 0 AND Ctsd <= 0	Fat
Rule610	Ptprcap > 8 AND Cela2a <= 0 AND Tmem119 <= 6 AND Cd3g <= 1 AND Gpr34 <= 112 AND Cd8b1 <= 3 AND Lpcat2 <= 115 AND Epcam <= 3 AND Chga <= 1 AND Cd8a <= 0 AND Cd79b > 11 AND Anxa8 <= 0 AND Cd79b <= 369 AND Gc <= 0 AND Cdh1 <= 0 AND Ttr <= 0 AND Mbp <= 9 AND Chga > 0 AND Ptprcap > 58	Marrow
Rule611	Ptprcap > 8 AND Cela2a <= 0 AND Tmem119 <= 6 AND Cd3g <= 1 AND Gpr34 <= 112 AND Cd8b1 <= 3 AND Lpcat2 <= 115 AND Epcam <= 3 AND Chga <= 1 AND Cd8a <= 0 AND Cd79b > 11 AND Anxa8 <= 0 AND Cd79b <= 369 AND Gc <= 0 AND Cdh1 <= 0 AND Ttr <= 0 AND Mbp <= 9 AND Dsp <= 0 AND Chga <= 0 AND Cx3cr1 <= 0 AND Siglech > 0 AND Coro1a <= 914	Spleen
Rule612	Ptprcap > 8 AND Cela2a <= 0 AND Cd3e > 0 AND Crybb1 <= 1 AND Lpcat2 <= 4 AND Ins2 <= 0 AND Gc <= 0 AND Chga <= 0 AND Coro1a > 124 AND Krt15 <= 1 AND Fcrls <= 0 AND Ptprc <= 1986 AND Cd3g <= 323 AND Krt6a <= 0 AND Dmkn <= 0 AND Tmem119 <= 0 AND Cd3g > 0 AND Ccr9 <= 1 AND Ptprc <= 1 AND Tcf7 <= 2	Thymus
Rule613	Ptprcap > 8 AND Cela2a <= 0 AND Cd3e > 0 AND Crybb1 <= 1 AND Lpcat2 <= 4 AND Ins2 <= 0 AND Gc <= 0 AND Chga <= 0 AND Coro1a > 124 AND Krt15 <= 1 AND Fcrls <= 0 AND Cd3g <= 323 AND Dmkn <= 0 AND Tmem119 <= 0 AND Krt6a <= 0 AND Cd3g > 0 AND Ccr9 <= 0 AND Rac2 > 2971 AND Mbp <= 236 AND C1qc <= 0 AND Coro1a > 2767	Marrow
Rule614	Ptprcap > 8 AND Cela2a <= 0 AND Cd3e > 0 AND Crybb1 <= 1 AND Lpcat2 <= 4 AND Ins2 <= 0 AND Gc <= 0 AND Chga <= 0 AND Coro1a > 124 AND Krt15 <= 1 AND Fcrls <= 0 AND Cd3g <= 323 AND Krt6a <= 0 AND Dmkn <= 0 AND Tmem119 <= 0 AND Cd3g > 0 AND Ccr9 <= 0 AND Sfn <= 12 AND Lgmn <= 338 AND Fxyd3 <= 0 AND Tspan8 > 0	Spleen
Rule615	Ptprcap > 8 AND Cela2a <= 0 AND Cd3e > 0 AND Crybb1 <= 1 AND Lpcat2 <= 4 AND Ins2 <= 0 AND Gc <= 0 AND Chga <= 0 AND Coro1a > 124 AND Krt15 <= 1 AND Fcrls <= 0 AND Cd3g <= 323 AND Krt6a <= 0 AND Dmkn <= 0 AND Tmem119 <= 0 AND Cd3g > 0 AND Ccr9 <= 0 AND Sfn <= 12 AND Lgmn <= 338 AND Fxyd3 <= 0 AND Mobp <= 0 AND Cd79b <= 8 AND Chodl <= 0 AND Gpr34 > 30 AND Ctsd > 13	Spleen
Rule616	Ptprcap > 8 AND Cela2a <= 0 AND Cd3e > 0 AND Crybb1 <= 1 AND Lpcat2 <= 4 AND Ins2 <= 0 AND Gc <= 0 AND Chga <= 0 AND Coro1a > 124 AND Krt15 <= 1 AND Fcrls <= 0 AND Cd3g <= 323 AND Krt6a <= 0 AND Dmkn <= 0 AND Tmem119 <= 0 AND Cd3g > 0 AND Ccr9 <= 0 AND Gpr34 <= 18 AND Sfn <= 12 AND Lgmn <= 338 AND Fxyd3 <= 0 AND Mobp <= 0 AND Gpr34 <= 0 AND Lpcat2 > 0	Spleen
Rule617	Ptprcap > 8 AND Cela2a <= 0 AND Cd3e > 0 AND Crybb1 <= 1 AND Lpcat2 <= 4 AND Ins2 <= 0 AND Gc <= 0 AND Chga <= 0 AND Coro1a > 124 AND Krt15 <= 1 AND Fcrls <= 0 AND Cd3g <= 323 AND Siglech > 1 AND Mbp <= 10	Marrow
Rule618	Ptprcap > 8 AND Cela2a <= 0 AND Cd3e > 0 AND Crybb1 <= 1 AND Lpcat2 <= 4 AND Ins2 <= 0 AND Gc <= 0 AND Chga <= 0 AND Coro1a > 124 AND Krt15 <= 1 AND Fcrls <= 0 AND Cd3g <= 323 AND Krt6a <= 0 AND Dmkn <= 0 AND Tmem119 <= 0 AND Cd3g > 0 AND Ccr9 <= 0 AND Gpr34 <= 18 AND Sfn <= 12 AND Fxyd3 <= 0 AND Lgmn <= 338 AND C1qc <= 0 AND Chodl <= 0 AND C1qb <= 1 AND Rac2 > 3150 AND Epcam <= 0	Spleen
Rule619	Ptprcap > 8 AND Cela2a <= 0 AND Cd3e > 0 AND Crybb1 <= 1 AND Lpcat2 <= 4 AND Ins2 <= 0 AND Gc <= 0 AND Chga <= 0 AND Coro1a > 124 AND Krt15 <= 1 AND Fcrls <= 0 AND Cd3g <= 323 AND Krt6a <= 0 AND Dmkn <= 0 AND Tmem119 <= 0 AND Cd3g > 0 AND Ccr9 <= 0 AND Gpr34 <= 18 AND Sfn <= 12 AND Fxyd3 <= 0 AND Lgmn <= 338 AND C1qc <= 0 AND Rac2 <= 2999 AND Chodl > 0	Fat
Rule620	Ptprcap > 8 AND Cela2a <= 0 AND Cd3e > 0 AND Crybb1 <= 1 AND Lpcat2 <= 4 AND Ins2 <= 0 AND Gc <= 0 AND Chga <= 0 AND Coro1a > 124 AND Krt15 <= 1 AND Fcrls <= 0 AND Cd3g <= 323 AND Krt6a <= 0 AND Dmkn <= 0 AND Tmem119 <= 0 AND Cd3g > 0 AND Ccr9 <= 0 AND Gpr34 <= 18 AND Sfn <= 12 AND Cd3e <= 217 AND C1qc <= 0 AND Rac2 > 3150	Brain Neurons
Rule621	Ptprcap > 8 AND Cela2a <= 0 AND Cd3e > 0 AND Crybb1 <= 1 AND Lpcat2 <= 4 AND Ins2 <= 0 AND Gc <= 0 AND Chga <= 0 AND Coro1a > 124 AND Krt15 <= 1 AND Fcrls <= 0 AND Cd3g <= 323 AND Krt6a <= 0 AND Dmkn <= 0 AND Tmem119 <= 0 AND Cd3g > 0 AND Ccr9 <= 0 AND Lgmn <= 341 AND Gpr34 <= 18 AND Fxyd3 <= 0 AND C1qa <= 0 AND Cd8a <= 1435 AND Trim29 > 0 AND Ptprcap <= 240	Fat
Rule622	Ptprcap > 8 AND Cela2a <= 0 AND Cd3e > 0 AND Crybb1 <= 1 AND Lpcat2 <= 4 AND Ins2 <= 0 AND Gc <= 0 AND Chga <= 0 AND Coro1a > 124 AND Krt15 <= 1 AND Fcrls <= 0 AND Cd3g <= 323 AND Krt6a <= 0 AND Dmkn <= 0 AND Cd3g <= 0 AND P2ry12 > 0	Muscle
Rule623	Ptprcap > 8 AND Cela2a <= 0 AND Cd3e > 0 AND Crybb1 <= 1 AND Lpcat2 <= 4 AND Ins2 <= 0 AND Gc <= 0 AND Chga <= 0 AND Coro1a > 124 AND Krt15 <= 1 AND Fcrls <= 0 AND Cd3g <= 323 AND Krt6a <= 0 AND Dmkn <= 0 AND Tmem119 <= 0 AND Ccr9 <= 0 AND Gpr34 <= 19 AND Lgmn <= 341 AND Fxyd3 <= 0 AND C1qa <= 0 AND Krt5 <= 0 AND Gpx2 <= 0 AND Cd8a <= 1435 AND Cdh1 <= 0 AND Cd79b <= 13 AND Ptprcap <= 909 AND Lgal…	Spleen
Rule624	Chodl > 2 AND Eps8l3 > 5 AND Serpinb5 <= 0	Colon
Rule625	Chodl > 2 AND Tspan8 > 1 AND Cd79b <= 0 AND Asb5 <= 12 AND Ttr <= 0 AND Tspan1 <= 10	Bladder
Rule626	Chodl > 2 AND Foxf1a <= 1 AND Chga > 13 AND Pax9 <= 11	Brain Neurons
Rule627	Chodl > 2 AND Foxf1a <= 1 AND Tmem119 <= 129 AND Cdh1 > 8 AND Serpinb5 <= 1	Trachea
Rule628	Chodl > 2 AND Foxf1a <= 1 AND Pitx1 <= 24 AND Tmem119 <= 129 AND Dsp <= 9 AND Dmbt1 <= 2 AND Cdh17 <= 0 AND Pkp1 <= 2 AND Lpcat2 <= 2 AND Phgr1 <= 0 AND Cd8a <= 3 AND Cldn3 <= 7 AND Perp <= 35 AND Ctsd <= 1605 AND Anxa8 <= 5 AND 2210415F13Rik <= 0 AND Sfn <= 85 AND Dmbt1 <= 0 AND Tspan8 <= 0 AND Guca2a <= 0 AND Klk1 <= 0 AND Pkp1 <= 0 AND Pitx1 <= 0 AND Prss2 <= 0 AND S100a14 <= 0 AND Ptprcap <= …	Muscle
Rule629	Foxf1a > 1 AND Fosl1 > 0 AND Serpinb5 <= 0 AND Asb5 <= 0 AND Mobp <= 1 AND Pitx2 <= 0 AND Dmkn <= 156 AND Prss32 <= 0 AND Rnase1 <= 7 AND C1qc <= 0 AND P2ry12 <= 1 AND Hexb > 5 AND Oit1 <= 0 AND Ctrb1 <= 18 AND P2ry13 <= 0 AND Mobp <= 0 AND Lgmn <= 89 AND Fosl1 <= 324 AND Trim29 <= 1 AND Hexb <= 650 AND Cx3cr1 <= 0 AND Coro1a <= 1 AND Dmbt1 <= 0 AND Csf1r <= 1 AND Rac2 <= 0 AND Krt13 <= 0 AND Krt…	Trachea
Rule630	Ptprcap > 6 AND Cela2a <= 0 AND Cd3e > 0 AND Crybb1 > 1 AND Gc <= 0 AND Aqp3 > 0	Trachea
Rule631	Ptprcap > 6 AND Cela2a <= 0 AND Cd3e > 0 AND Lpcat2 <= 3 AND Ins2 <= 0 AND Gc <= 0 AND Chga <= 0 AND Cd79b > 187 AND Krt15 > 1 AND Epcam <= 0	Liver
Rule632	Ptprcap > 6 AND Cela2a <= 0 AND Cd3e > 0 AND Lpcat2 <= 3 AND Ins2 <= 0 AND Gc <= 0 AND Chga <= 0 AND Cd79b > 187 AND Trem2 <= 0 AND C1qb <= 1 AND 1190003J15Rik <= 0 AND Klk1 <= 0 AND Tmem119 <= 0 AND Ckmt1 <= 0 AND Fcrls <= 0 AND Guca2a <= 0 AND Csf1r <= 0 AND Fxyd3 <= 0 AND C1qa <= 0 AND C1qc <= 0 AND Laptm5 <= 2683 AND Epcam > 42 AND Lgmn <= 674	Marrow
Rule633	Ptprcap > 6 AND Cela2a <= 0 AND Cd3e > 0 AND Lpcat2 <= 3 AND Ins2 <= 0 AND Gc <= 0 AND Cldn7 > 1 AND Pcsk1n <= 0 AND Ccr9 <= 14 AND Hexb > 34	Trachea
Rule634	Ptprcap > 6 AND Cela2a <= 0 AND Cd3e > 0 AND Lpcat2 <= 3 AND Ins2 <= 0 AND Gc <= 0 AND Laptm5 > 30 AND Chga <= 0 AND Cx3cr1 <= 5 AND Fcrls <= 0 AND Dmkn <= 0 AND Guca2a > 0 AND P2ry12 <= 0 AND Sycn <= 0 AND Cd79b <= 1287 AND Coro1a > 486 AND Lgals7 <= 0 AND Ptprc <= 996	Spleen
Rule635	Ptprcap > 6 AND Cela2a <= 0 AND Cd3e > 0 AND Lpcat2 <= 3 AND Ins2 <= 0 AND Gc <= 0 AND Guca2a > 0 AND Pigr > 0 AND Klk1 <= 0	Marrow
Rule636	Ptprcap > 6 AND Cela2a <= 0 AND Cd3e > 0 AND Lpcat2 <= 3 AND Ins2 <= 0 AND Gc <= 0 AND Laptm5 > 30 AND Chga <= 0 AND Fcrls <= 0 AND Dmkn <= 0 AND Perp > 1 AND Sfn <= 2 AND Ctsd <= 1065	Fat
Rule637	Ptprcap > 6 AND Cela2a <= 0 AND Cd3e > 0 AND Lpcat2 <= 3 AND Ins2 <= 0 AND Gc <= 0 AND Laptm5 > 30 AND Chga <= 0 AND Fcrls <= 0 AND Dmkn <= 0 AND Klk1 > 0 AND Siglech <= 0 AND C1qb <= 0 AND Fxyd3 <= 0 AND Ccr9 <= 11 AND Perp <= 0 AND Ptprcap > 119 AND Klk1 <= 1	Spleen
Rule638	Ptprcap > 6 AND Cela2a <= 0 AND Cd3e > 0 AND Lpcat2 <= 3 AND Ins2 <= 0 AND Gc <= 0 AND Chga > 4 AND Siglech > 0	Kidney
Rule639	Ptprcap > 6 AND Cela2a <= 0 AND Cd3e > 0 AND Lpcat2 <= 3 AND Ins2 <= 0 AND Gc <= 0 AND Laptm5 > 30 AND Fcrls <= 0 AND Dmkn <= 0 AND Klk1 <= 0 AND Krt15 <= 1 AND Ccr9 > 0 AND Gpx2 <= 0 AND Trem2 <= 0 AND Lgmn <= 67 AND Pigr <= 0 AND Ckmt1 <= 0 AND Perp > 0 AND Ctsd > 0	Thymus
Rule640	Ptprcap > 6 AND Cela2a <= 0 AND Cd3e > 0 AND Lpcat2 <= 3 AND Ins2 <= 0 AND Gc <= 0 AND Laptm5 > 30 AND Fcrls <= 0 AND Dmkn <= 0 AND Klk1 <= 0 AND Krt15 <= 1 AND Ccr9 > 0 AND Gpx2 <= 0 AND Trem2 <= 0 AND Lgmn <= 67 AND Pigr <= 0 AND Ckmt1 <= 0 AND Tmem119 <= 0 AND Perp <= 0 AND Ctrb1 <= 0 AND Lypd3 <= 0 AND Tspan8 <= 0 AND Aqp3 <= 68 AND Krt5 <= 0 AND Try5 <= 0 AND Krt8 <= 2 AND Lgals7 <= 0 AND Cs…	Spleen
Rule641	Ptprcap > 6 AND Cela2a <= 0 AND Cd3e > 0 AND Lpcat2 <= 3 AND Ins2 <= 0 AND Gc <= 0 AND Laptm5 > 30 AND Fcrls <= 0 AND Dmkn <= 0 AND Klk1 <= 0 AND Krt15 <= 1 AND Ccr9 > 0 AND Gpx2 <= 0 AND Trem2 <= 0 AND 2210415F13Rik <= 0 AND Lpcat2 <= 1 AND Fam25c <= 0 AND Dsc3 <= 0 AND Lypd3 <= 0 AND Tmem119 <= 0 AND Mobp <= 0 AND Cldn7 <= 0 AND Ckmt1 <= 0 AND Tspan8 <= 0 AND Lgmn <= 9 AND Krt8 <= 2 AND Krt14 >…	Thymus
Rule642	Ptprcap > 6 AND Cela2a <= 0 AND Cd3e > 0 AND Lpcat2 <= 3 AND Ins2 <= 0 AND Gc <= 0 AND Laptm5 > 30 AND Fcrls <= 0 AND Dmkn <= 0 AND Klk1 <= 0 AND Krt15 <= 1 AND Ptprcap > 202 AND Try5 > 0	Thymus
Rule643	Foxf1a > 1 AND Fosl1 > 3 AND Rnase1 <= 38 AND Tfap2c <= 2 AND Asb5 <= 1 AND S100a14 <= 0 AND Mobp > 1 AND Epcam > 0	Mammary
Rule644	Foxf1a > 1 AND Fosl1 > 3 AND Rnase1 <= 38 AND Tfap2c <= 2 AND Asb5 > 1	Bladder
Rule645	Foxf1a > 1 AND Fosl1 > 3 AND Rnase1 <= 38 AND Tfap2c <= 2 AND S100a14 <= 0 AND Dmkn <= 8 AND Serpinb5 > 0 AND Lgmn <= 2	Trachea
Rule646	Foxf1a > 1 AND Fosl1 > 3 AND Serpinb5 <= 0 AND Tfap2c <= 13 AND Rnase1 <= 38 AND S100a14 <= 0 AND Dmkn <= 8 AND Prss32 <= 0 AND Fcrls <= 1 AND Pitx2 > 3 AND Mbp <= 16 AND Tspan1 <= 0 AND Tspan8 <= 25	Trachea
Rule647	Foxf1a > 1 AND Fosl1 > 3 AND Pitx2 <= 4 AND Serpinb5 <= 0 AND Rnase1 <= 38 AND Dmkn <= 115 AND Prss32 <= 0 AND Ctsd > 205 AND Ctsd <= 3616 AND Fcrls <= 1 AND P2ry13 <= 0 AND Ctrb1 <= 19 AND Krt17 <= 0 AND Krt6a <= 0 AND Trem2 <= 0 AND Siglech <= 0 AND Lgmn <= 133 AND Cx3cr1 <= 0 AND C1qb <= 0 AND Resp18 <= 0 AND Coro1a <= 1 AND Cdh1 <= 0 AND Slc2a5 <= 0 AND Coro1a <= 0 AND Krt14 <= 1 AND Mobp <= …	Trachea
Rule648	Ptprcap > 6 AND Cela2a <= 0 AND Cd3e > 0 AND Lpcat2 <= 3 AND Ins2 <= 0 AND Gc <= 0 AND Laptm5 > 30 AND Fcrls <= 0 AND Dmkn <= 0 AND Klk1 <= 0 AND Krt15 <= 1 AND Ptprcap > 202 AND Gpx2 <= 0 AND Krt6a <= 0 AND Krt14 > 2 AND Rac2 <= 2172	Spleen
Rule649	Ptprcap > 6 AND Cela2a <= 0 AND Cd3e > 0 AND Lpcat2 <= 3 AND Ins2 <= 0 AND Gc <= 0 AND Laptm5 > 30 AND Fcrls <= 0 AND Dmkn <= 0 AND Klk1 <= 0 AND Krt5 <= 0 AND Guca2a > 0 AND Cd3e <= 178	Fat
Rule650	Ptprcap > 6 AND Cela2a <= 0 AND Cd3e > 0 AND Lpcat2 <= 3 AND Ins2 <= 0 AND Gc <= 0 AND Laptm5 > 30 AND Fcrls <= 0 AND Dmkn <= 0 AND Klk1 <= 0 AND Krt5 <= 0 AND Cd3d > 387 AND Ptprc <= 1726 AND Anxa8 <= 0 AND Fxyd3 <= 0 AND Mobp <= 0 AND 2210415F13Rik <= 0 AND Krt15 > 1 AND Krt8 <= 0 AND Tmem119 <= 0 AND Tcf7 <= 539	Thymus
Rule651	Ptprcap > 6 AND Cela2a <= 0 AND Cd3e > 0 AND Lpcat2 <= 3 AND Ins2 <= 0 AND Gc <= 0 AND Laptm5 > 30 AND Fcrls <= 0 AND Dmkn <= 0 AND Klk1 <= 0 AND Krt5 <= 0 AND Sfn <= 2 AND Ptprc <= 2041 AND Cd3g > 728 AND Cldn7 <= 0 AND Tspan8 <= 0 AND Serpinb5 > 0 AND Krt8 <= 0	Thymus
Rule652	Ptprcap > 6 AND Cela2a <= 0 AND Cd3e > 0 AND Lpcat2 <= 3 AND Ins2 <= 0 AND Gc <= 0 AND Laptm5 > 30 AND Fcrls <= 0 AND Dmkn <= 0 AND Klk1 <= 0 AND Krt5 <= 0 AND Sfn <= 2 AND Ptprc <= 2041 AND Cd3g > 684 AND Tspan8 <= 0 AND Krt15 <= 1 AND Lpcat2 <= 0 AND P2ry13 > 0 AND Hexb > 0	Thymus
Rule653	Ptprcap > 6 AND Cela2a <= 0 AND Cd3e > 0 AND Lpcat2 <= 3 AND Ins2 <= 0 AND Gc <= 0 AND Laptm5 > 30 AND Fcrls <= 0 AND Dmkn <= 0 AND Klk1 <= 0 AND Krt5 <= 0 AND Cd3d > 387 AND Sycn <= 0 AND Anxa8 <= 0 AND Cldn3 <= 0 AND Mobp <= 0 AND Ptprc <= 1747 AND Fxyd3 <= 0 AND Krt15 <= 1 AND Serpinb5 <= 0 AND Cdh1 > 0	Thymus
Rule654	Ptprcap > 6 AND Cela2a <= 0 AND Cd3e > 0 AND Lpcat2 <= 3 AND Ins2 <= 0 AND Gc <= 0 AND Laptm5 > 30 AND Fcrls <= 0 AND Dmkn <= 0 AND Klk1 <= 0 AND Krt5 <= 0 AND Sfn <= 2 AND Gpx2 > 0 AND C1qb <= 0 AND Krt15 > 0	Spleen
Rule655	Foxf1a > 1 AND Pitx2 > 0 AND Cd8b1 <= 0 AND Hpgds <= 0 AND Tspan8 > 0	Bladder
Rule656	Foxf1a > 1 AND Fam25c > 1 AND C1qc <= 0 AND Cldn3 <= 0	Trachea
Rule657	Foxf1a > 1 AND Tspan8 > 3 AND Fxyd3 <= 5 AND Fam25c <= 0 AND Fosl1 <= 2 AND Rac2 <= 8 AND Ckmt1 <= 3 AND 2610528A11Rik <= 0 AND Cdx1 <= 0 AND Ptprc <= 0 AND Siglech <= 1 AND Gpr34 <= 0	Lung
Rule658	Ptprcap > 6 AND Cela2a <= 0 AND Cd3e > 0 AND Lpcat2 <= 3 AND Ins2 <= 0 AND Gc <= 0 AND Laptm5 > 30 AND Fcrls <= 0 AND Dmkn <= 0 AND Klk1 <= 0 AND Krt15 <= 1 AND Krt5 <= 0 AND Gpx2 > 0 AND C1qb > 0	Lung
Rule659	Ptprcap > 6 AND Cela2a <= 0 AND Cd3e > 0 AND Lpcat2 <= 3 AND Ins2 <= 0 AND Gc <= 0 AND Laptm5 > 30 AND Fcrls <= 0 AND Dmkn <= 0 AND Klk1 <= 0 AND Krt15 <= 1 AND Krt5 <= 0 AND Sfn <= 2 AND Cd3d > 387 AND Sycn <= 0 AND Cldn3 <= 0 AND Ptprc <= 1747 AND Serpinb5 <= 0 AND P2ry13 > 0 AND Ctsd > 78	Spleen
Rule660	Ptprcap > 6 AND Cela2a <= 0 AND Cd3e > 0 AND Lpcat2 <= 3 AND Ins2 <= 0 AND Gc <= 0 AND Laptm5 > 30 AND Fcrls <= 0 AND Dmkn <= 0 AND Klk1 <= 0 AND Krt15 <= 1 AND Krt5 <= 0 AND Cd3d > 387 AND Sycn <= 0 AND P2ry13 <= 0 AND Cldn3 <= 0 AND Serpinb5 <= 0 AND Ptprc <= 1747 AND Fxyd3 <= 0 AND Perp <= 0 AND C1qa <= 1 AND Siglech <= 0 AND Cd3e <= 32 AND Cldn7 <= 0 AND Tmem119 <= 0 AND Chga <= 0 AND Lpcat2 …	Thymus
Rule661	Ptprcap > 6 AND Cela2a <= 0 AND Cd3e > 0 AND Lpcat2 <= 3 AND Ins2 <= 0 AND Gc <= 0 AND Laptm5 > 30 AND Fcrls <= 0 AND Dmkn <= 0 AND Klk1 <= 0 AND Krt15 <= 1 AND Krt5 <= 0 AND Cx3cr1 <= 0 AND Ccr9 > 0 AND Ttr <= 0 AND Krt14 > 1 AND Krt17 > 0	Spleen
Rule662	Ptprcap > 6 AND Cela2a <= 0 AND Cd3e > 0 AND Lpcat2 <= 3 AND Ins2 <= 0 AND Gc <= 0 AND Laptm5 > 30 AND Fcrls <= 0 AND Dmkn <= 0 AND Klk1 <= 0 AND Krt15 <= 1 AND Krt5 <= 0 AND Sfn <= 2 AND Cx3cr1 <= 0 AND Slc2a5 > 0 AND Cd8a <= 199	Spleen
Rule663	Ptprcap > 6 AND Cela2a <= 0 AND Cd3e <= 0 AND Tmem119 <= 6 AND P2ry12 > 4 AND Cdx1 <= 0 AND Cd8a <= 103 AND Fosl1 <= 10 AND Ins2 <= 1 AND C1qc <= 6	Fat
Rule664	Ptprcap > 6 AND Cela2a <= 0 AND Cd3e <= 0 AND Tmem119 <= 6 AND P2ry12 > 4 AND Cdx1 <= 0 AND Epcam <= 18 AND Fosl1 <= 10	Marrow
Rule665	Ptprcap > 6 AND Cela2a <= 0 AND Cd3e <= 0 AND Tmem119 <= 5 AND P2ry12 > 2 AND Cdx1 <= 0 AND Oit1 <= 0 AND Cd8a <= 96 AND Siglech <= 1 AND Krt17 <= 0 AND Ptprc > 3	Spleen
Rule666	Ptprcap > 6 AND Cela2a <= 0 AND Cd3e > 0 AND Lpcat2 <= 3 AND Ins2 <= 0 AND Gc <= 0 AND Laptm5 > 30 AND Fcrls <= 0 AND Dmkn <= 0 AND Klk1 <= 0 AND Krt15 <= 1 AND Krt5 <= 0 AND Sfn <= 2 AND Cx3cr1 <= 0 AND Ccr9 > 0 AND Krt14 <= 1 AND Ttr <= 0 AND Tmem119 <= 0 AND Trem2 <= 0 AND 2210415F13Rik <= 0 AND Ckmt1 <= 0 AND Cldn7 <= 0 AND Aqp3 <= 64 AND Siglech <= 0 AND Lgmn <= 16 AND P2ry12 <= 0 AND Sfn <=…	Thymus
Rule667	Ptprcap > 6 AND Cela2a <= 0 AND Cd3e > 0 AND Lpcat2 <= 3 AND Ins2 <= 0 AND Gc <= 0 AND Laptm5 > 30 AND Fcrls <= 0 AND Dmkn <= 0 AND Klk1 <= 0 AND Krt15 <= 1 AND Krt5 <= 0 AND Cx3cr1 <= 0 AND Tcf7 > 43 AND Krt6a > 0 AND Ptprcap <= 317	Marrow
Rule668	Ptprcap > 6 AND Cela2a <= 0 AND Cd3e > 0 AND Lpcat2 <= 3 AND Ins2 <= 0 AND Gc <= 0 AND Laptm5 > 30 AND Fcrls <= 0 AND Dmkn <= 0 AND Klk1 <= 0 AND Krt15 <= 1 AND Krt5 <= 0 AND Cx3cr1 <= 0 AND Tcf7 > 43 AND Ttr <= 0 AND Mobp <= 0 AND Sfn <= 30 AND Serpinb5 <= 0 AND Perp <= 0 AND Siglech > 0 AND Siglech <= 1 AND Krt19 <= 0 AND Krt15 <= 0 AND Krt17 <= 1	Thymus
Rule669	Ptprcap > 6 AND Cela2a <= 0 AND Cd3e <= 0 AND Tmem119 <= 5 AND P2ry12 > 2 AND Cdx1 <= 0 AND Oit1 <= 0 AND P2ry12 <= 11 AND Tmem119 > 0	Fat
Rule670	Ptprcap > 6 AND Cela2a <= 0 AND Cd3e <= 0 AND Tmem119 <= 5 AND Gpr34 <= 3 AND Lpcat2 <= 115 AND Cd8a <= 1 AND Epcam <= 3 AND Cd79b > 1 AND Tcf7 > 13 AND Cd3g <= 112	Lung
Rule671	Ptprcap > 6 AND Cela2a <= 0 AND Cd3e <= 0 AND Tmem119 <= 5 AND Gpr34 <= 3 AND Lpcat2 <= 115 AND Cd8a <= 1 AND Epcam <= 3 AND Cd79b > 1 AND Anxa8 <= 0 AND Gc <= 0 AND Cd79b <= 363 AND Aqp3 <= 22 AND Cdh1 <= 0 AND Chga > 0 AND Chga <= 9 AND Chga <= 2 AND Coro1a <= 123	Muscle
Rule672	Ptprcap > 6 AND Cela2a <= 0 AND Cd3e <= 0 AND Tmem119 <= 5 AND Gpr34 <= 3 AND Lpcat2 <= 115 AND Cd8a <= 1 AND Epcam <= 3 AND Cd79b > 1 AND Anxa8 <= 0 AND Gc <= 0 AND Ttr <= 0 AND Krt15 <= 3 AND Krt6a <= 0 AND Cd79b <= 363 AND Chga > 0	Fat
Rule673	Ptprcap > 6 AND Cela2a <= 0 AND Cd3e <= 0 AND Tmem119 <= 5 AND Gpr34 <= 3 AND Dmbt1 <= 0 AND Lpcat2 <= 115 AND Ccr9 > 16 AND Lgals7 <= 1 AND Chga <= 2 AND Tcf7 <= 154 AND Cx3cr1 <= 1 AND C1qc <= 1 AND Krt6a <= 1 AND Ttr <= 0 AND Klk1 <= 59 AND Cldn3 <= 0 AND Krt19 <= 0 AND Sfn <= 1 AND Klk1 <= 8	Spleen
Rule674	Ptprcap > 6 AND Cela2a <= 0 AND Cd3e <= 0 AND Tmem119 <= 5 AND Gpr34 <= 3 AND Dmbt1 <= 0 AND Ccr9 > 16 AND Cd3d > 22	Thymus
Rule675	Ptprcap > 6 AND Cela2a <= 0 AND Cd3e <= 0 AND Tmem119 <= 5 AND Gpr34 <= 3 AND Dmbt1 <= 0 AND Lpcat2 <= 115 AND Ccr9 > 16 AND Chga <= 0 AND C1qb <= 0 AND Cldn3 <= 0 AND Hexb <= 328 AND P2ry13 <= 40 AND Coro1a > 74	Marrow
Rule676	Ptprcap > 6 AND Cela2a <= 0 AND Cd3e <= 0 AND Tmem119 <= 5 AND Gpr34 <= 3 AND Dmbt1 <= 0 AND Ccr9 > 17 AND Myb <= 0 AND Mbp <= 6 AND P2ry13 <= 30 AND Laptm5 > 176	Fat
Rule677	Ptprcap > 6 AND Cela2a <= 0 AND Ccr9 > 1 AND Krt19 > 4	Lung
Rule678	Ptprcap > 6 AND Cela2a <= 0 AND Ccr9 > 1 AND Perp > 2	Trachea
Rule679	Ptprcap > 6 AND Cela2a <= 0 AND Ccr9 > 1 AND Clps > 0 AND Hexb <= 40	Thymus
Rule680	Ptprcap > 6 AND Cela2a <= 0 AND Ccr9 > 1 AND Siglech <= 541 AND Ttr > 0 AND Cd3e > 69 AND Krt8 <= 0	Thymus
Rule681	Ptprcap > 6 AND Cela2a <= 0 AND Ccr9 > 1 AND Siglech > 541 AND Sfn <= 21 AND Lgmn <= 18	Marrow
Rule682	Ptprcap > 6 AND Cela2a <= 0 AND Ccr9 > 1 AND Ttr > 0 AND Rac2 > 616	Liver
Rule683	Ptprcap > 6 AND Cela2a <= 0 AND Ccr9 > 1 AND Klk1 > 14 AND Chga <= 0	Lung
Rule684	Ptprcap > 6 AND Cela2a <= 0 AND Ccr9 > 1 AND Klk1 > 18	Trachea
Rule685	Ptprcap > 6 AND Cela2a <= 0 AND Ccr9 > 1 AND Epcam > 73 AND Aqp3 <= 227 AND Ptprcap > 182	Spleen
Rule686	Ptprcap > 6 AND Cela2a <= 0 AND Ccr9 > 1 AND Epcam > 73 AND Lgals4 <= 0	Trachea
Rule687	Ptprcap > 6 AND Cela2a <= 0 AND Ccr9 > 1 AND Krt14 > 1 AND Cd3d > 356	Thymus
Rule688	Ptprcap > 6 AND Cela2a <= 0 AND Ccr9 > 1 AND Krt14 > 1 AND Ptprcap <= 299	Muscle
Rule689	Ptprcap > 6 AND Cela2a <= 0 AND Ccr9 > 1 AND Lpcat2 <= 130 AND Tcf7 > 0 AND Scgn <= 0 AND Laptm5 > 5439 AND Gpr34 <= 0	Lung
Rule690	Ptprcap > 6 AND Cela2a <= 0 AND Ccr9 > 1 AND Lpcat2 <= 130 AND Tcf7 > 0 AND Scgn <= 0 AND Ptprcap > 34 AND 2210415F13Rik > 1 AND Cldn7 > 0	Lung
Rule691	Ptprcap > 6 AND Cela2a <= 0 AND Ccr9 > 1 AND Lpcat2 <= 130 AND Tcf7 > 0 AND Scgn <= 0 AND Ptprcap > 34 AND Cd79b <= 585 AND Klk1 <= 0 AND Mbp <= 1174 AND Ins2 > 1 AND Fcrls <= 1 AND Trim29 <= 0 AND Aqp3 <= 0 AND Coro1a <= 6047 AND 2210415F13Rik <= 0 AND Pnlip <= 0 AND Mbp <= 0	Thymus
Rule692	Ptprcap > 6 AND Cela2a <= 0 AND Lpcat2 <= 20 AND Tmem119 <= 4 AND Tcf7 > 45 AND Rnase1 > 0 AND Krt15 <= 0 AND Ctrb1 <= 0	Thymus
Rule693	Ptprcap > 6 AND Cela2a <= 0 AND Lpcat2 <= 20 AND Tmem119 <= 4 AND Cd3e <= 0 AND Gpr34 > 66 AND Cd79b > 121	Spleen
Rule694	Ptprcap > 6 AND Cela2a <= 0 AND Lpcat2 <= 20 AND Tmem119 <= 4 AND Cd3e > 0 AND Ins2 <= 0 AND Lpcat2 <= 2 AND Gc <= 0 AND Dmkn <= 0 AND Laptm5 > 33 AND Klk1 <= 0 AND Krt15 <= 1 AND Fcrls <= 0 AND Krt5 <= 0 AND Cx3cr1 <= 0 AND Ccr9 > 0 AND Trem2 <= 0 AND Tmem119 <= 0 AND Ckmt1 <= 0 AND Siglech <= 0 AND 2210415F13Rik <= 0 AND Cldn3 <= 0 AND Lgmn <= 16 AND Oit1 <= 0 AND P2ry12 > 0 AND Cd3e <= 124	Thymus
Rule695	Ptprcap > 6 AND Cela2a <= 0 AND Lpcat2 <= 20 AND Tmem119 <= 4 AND Cd3e <= 0 AND Gpr34 > 3 AND Cd8b1 <= 70 AND C1qc <= 0 AND Siglech <= 0 AND Krt8 <= 0 AND Gpr34 > 197	Heart
Rule696	Ptprcap > 6 AND Cela2a <= 0 AND Lpcat2 <= 20 AND Tmem119 <= 4 AND Cd3e <= 0 AND Epcam <= 3 AND Krt6a <= 0 AND Krt13 > 0 AND Coro1a <= 270 AND Ctsd <= 209	Muscle
Rule697	Ptprcap > 8 AND Cela2a <= 0 AND Tmem119 <= 4 AND Lpcat2 <= 20 AND Cd3e <= 0 AND Dmbt1 <= 0 AND Epcam <= 3 AND Ttr <= 0 AND Cd79b > 1 AND Chga > 2 AND Lgmn <= 21 AND Cd79b <= 2529	Spleen
Rule698	Ptprcap > 8 AND Cela2a <= 0 AND Tmem119 <= 4 AND Lpcat2 <= 20 AND Cd3e <= 0 AND Dmbt1 <= 0 AND Epcam <= 3 AND Chga > 2 AND Cd79b <= 2688 AND Lgals4 <= 0 AND Laptm5 <= 11	Liver
Rule699	Ptprcap > 8 AND Cela2a <= 0 AND Tmem119 <= 4 AND Lpcat2 <= 20 AND Cd3e <= 0 AND Dmbt1 <= 0 AND Epcam <= 3 AND Ttr <= 0 AND Cd79b > 1 AND Cd3g > 44 AND Gpr34 <= 0 AND Ptprc > 91 AND Rac2 <= 1944	Spleen
Rule700	Ptprcap > 8 AND Cela2a <= 0 AND Tmem119 <= 4 AND Lpcat2 <= 20 AND Cd3e <= 0 AND Dmbt1 <= 0 AND Epcam <= 3 AND Ttr <= 0 AND Cd79b > 1 AND Cd3g > 44 AND Gpr34 <= 0	Muscle
Rule701	Ptprcap > 8 AND Cela2a <= 0 AND Tmem119 <= 4 AND Lpcat2 <= 20 AND Cd3e <= 0 AND Epcam <= 3 AND Krt6a <= 0 AND Krt13 > 0 AND Cd3d <= 0 AND Coro1a <= 5946 AND Coro1a > 259 AND Krt19 <= 0 AND Hpgds <= 2 AND Perp <= 1 AND Cd79b <= 1956	Fat
Rule702	Ptprcap > 8 AND Cela2a <= 0 AND Tmem119 <= 4 AND Lpcat2 <= 20 AND Cd3e <= 0 AND Dmbt1 <= 0 AND Epcam <= 3 AND Ttr <= 0 AND Cd79b > 1 AND Cd8b1 > 0 AND Cd3g <= 38 AND Gpr34 <= 0 AND Cd8b1 <= 6	Muscle
Rule703	Ptprcap > 8 AND Cela2a <= 0 AND Tmem119 <= 4 AND Lpcat2 <= 20 AND Cd3e <= 0 AND Dmbt1 <= 0 AND Epcam <= 3 AND Ttr <= 0 AND Cd79b > 1 AND Cd8b1 <= 0 AND Gc <= 0 AND Chga > 2 AND Hpgds > 0	Lung
Rule704	Ptprcap > 8 AND Cela2a <= 0 AND Tmem119 <= 4 AND Lpcat2 <= 20 AND Cd3e <= 0 AND Dmbt1 <= 0 AND Epcam <= 3 AND Ttr <= 0 AND Cd79b > 1 AND Cd8b1 <= 0 AND Gc <= 0 AND Anxa8 <= 0 AND Krt6a <= 0 AND Cd8a > 0 AND Sfn <= 0 AND Perp <= 0 AND Ctsd > 0	Spleen
Rule705	Ptprcap > 8 AND Cela2a <= 0 AND Tmem119 <= 4 AND Lpcat2 <= 20 AND Cd3e <= 0 AND Epcam <= 3 AND Krt6a <= 0 AND Cd79b > 11 AND Cd8a <= 0 AND Anxa8 <= 0 AND Ccr9 <= 0 AND Gc <= 0 AND Krt15 <= 2 AND Ttr <= 0 AND Cd79b <= 369 AND Siglech > 0 AND Cx3cr1 <= 0	Marrow
Rule706	Ptprcap > 8 AND Cela2a <= 0 AND Tmem119 <= 4 AND Lpcat2 <= 20 AND Cd3e <= 0 AND Epcam <= 3 AND Krt6a <= 0 AND Cd79b > 11 AND Cd8a <= 0 AND Anxa8 <= 0 AND Ccr9 <= 0 AND Cd79b <= 369 AND Gc <= 0 AND Ttr > 0 AND Hexb <= 132 AND C1qa <= 0 AND Mbp <= 8 AND Laptm5 <= 339	Fat
Rule707	Ptprcap > 8 AND Cela2a <= 0 AND Tmem119 <= 4 AND Lpcat2 <= 20 AND Cd3e <= 0 AND Epcam <= 3 AND Krt6a <= 0 AND Cd79b > 11 AND Cd8a <= 0 AND Anxa8 <= 0 AND Ccr9 <= 0 AND Gc <= 0 AND Krt15 <= 2 AND Cd79b <= 369 AND Ttr > 0 AND Hexb <= 123 AND Ctsd <= 6	Spleen
Rule708	Ptprcap > 8 AND Cela2a <= 0 AND Tmem119 <= 4 AND Lpcat2 <= 20 AND Cd3e <= 0 AND Epcam <= 3 AND Krt6a <= 0 AND Ttr <= 0 AND Perp <= 2 AND Cd79b > 1 AND Anxa8 <= 0 AND Cd8a <= 0 AND Ccr9 <= 0 AND Gc <= 0 AND Cd79b <= 409 AND Chga > 0 AND P2ry12 <= 0	Lung
Rule709	Ptprcap > 8 AND Cela2a <= 0 AND Tmem119 <= 4 AND Lpcat2 <= 20 AND Cd3e <= 0 AND Epcam <= 3 AND Krt6a <= 0 AND Cd79b > 11 AND Cd8a <= 0 AND Anxa8 <= 0 AND Ccr9 <= 0 AND Gc <= 0 AND Krt15 <= 2 AND Ttr <= 0 AND Cd79b <= 409 AND Mbp <= 5 AND Lpcat2 > 0 AND 2210415F13Rik <= 0 AND Lpcat2 <= 9	Muscle
Rule710	Ptprcap > 8 AND Cela2a <= 0 AND Tmem119 <= 4 AND Lpcat2 <= 20 AND Tcf7 > 45 AND Pnlip > 0 AND Coro1a > 450 AND Krt14 <= 0 AND Mbp <= 122	Lung
Rule711	Ptprcap > 8 AND Cela2a <= 0 AND Tmem119 <= 4 AND Lpcat2 <= 20 AND Tcf7 > 45 AND Cd3e > 0 AND Slc2a5 <= 0 AND Ins2 <= 0 AND Cdh1 > 0 AND Lgals4 <= 0 AND Krt8 <= 0	Fat
Rule712	Ptprcap > 8 AND Cela2a <= 0 AND Tmem119 <= 4 AND Lpcat2 <= 20 AND Tcf7 > 45 AND Cd3e > 0 AND Slc2a5 <= 0 AND Ins2 <= 0 AND Lpcat2 > 3 AND Chga <= 0	Spleen
Rule713	Ptprcap > 8 AND Cela2a <= 0 AND Tmem119 <= 4 AND Lpcat2 <= 20 AND Tcf7 > 45 AND C1qa <= 2 AND Cd3e > 0 AND Ins2 <= 0 AND Ptprc > 0 AND Lpcat2 > 1 AND P2ry12 <= 1 AND Hexb <= 127	Lung
Rule714	Ptprcap > 8 AND Cela2a <= 0 AND Tmem119 <= 4 AND Lpcat2 <= 20 AND Tcf7 > 45 AND C1qa <= 2 AND Cd3e > 0 AND Ins2 <= 0 AND Ptprc > 0 AND Gc > 0 AND Tspan8 <= 0 AND P2ry12 <= 0 AND Csf1r <= 0 AND Rac2 <= 658 AND Krt15 <= 0	Spleen
Rule715	Ptprcap > 8 AND Cela2a <= 0 AND Tmem119 <= 4 AND Lpcat2 <= 20 AND Tcf7 > 45 AND C1qa <= 2 AND Cd3e > 0 AND Gc <= 0 AND Scgn > 0 AND Lgmn <= 0 AND Myb <= 11	Lung
Rule716	Ptprcap > 8 AND Cela2a <= 0 AND Tmem119 <= 4 AND Lpcat2 <= 20 AND Tcf7 > 45 AND C1qa <= 2 AND Cd3e > 0 AND Gc <= 0 AND Ins2 <= 0 AND Ttr <= 0 AND Mobp <= 0 AND B4galnt2 > 0 AND Krt8 <= 0	Marrow
Rule717	Ptprcap > 8 AND Cela2a <= 0 AND Tmem119 <= 4 AND Lpcat2 <= 20 AND Tcf7 > 45 AND C1qa <= 2 AND Cd3e > 0 AND Gc <= 0 AND Ins2 <= 0 AND Ttr <= 0 AND Mobp <= 0 AND Cx3cr1 <= 0 AND Krt6a <= 0 AND Trem2 <= 0 AND Sycn <= 0 AND Gpx2 > 0 AND Ctsd > 613	Marrow
Rule718	Ptprcap > 8 AND Cela2a <= 0 AND Tmem119 <= 4 AND Lpcat2 <= 20 AND Tcf7 > 45 AND C1qa <= 2 AND Cd3e > 0 AND Gc <= 0 AND Ins2 <= 0 AND Ttr <= 0 AND Mobp <= 0 AND Cx3cr1 <= 0 AND Trem2 <= 0 AND Krt6a <= 0 AND Sycn <= 0 AND Fcrls <= 0 AND Klk1 <= 0 AND Dmkn <= 0 AND Krt14 > 2 AND Sfn > 0	Spleen
Rule719	Ptprcap > 8 AND Cela2a <= 0 AND Tmem119 <= 4 AND Lpcat2 <= 20 AND Tcf7 > 45 AND C1qa <= 2 AND Cd3e > 0 AND Gc <= 0 AND Ins2 <= 0 AND Ttr <= 0 AND Mobp <= 0 AND Cx3cr1 <= 0 AND Krt14 <= 2 AND Fcrls <= 0 AND Trem2 > 0 AND Dmkn <= 0	Fat
Rule720	Ptprcap > 8 AND Cela2a <= 0 AND Tmem119 <= 4 AND Lpcat2 <= 20 AND Tcf7 > 45 AND C1qa <= 2 AND Cd3e > 0 AND Gc <= 0 AND Ins2 <= 0 AND Ttr <= 0 AND Mobp <= 0 AND Cx3cr1 <= 0 AND Krt14 <= 2 AND Fcrls <= 0 AND Sycn <= 0 AND Krt6a <= 0 AND Ptprc > 0 AND Dmkn <= 0 AND C1qc <= 1 AND Chga <= 0 AND Sfn > 30 AND Lgmn <= 1 AND Cd3g > 165	Spleen
Rule721	Ptprcap > 8 AND Cela2a <= 0 AND Tmem119 <= 4 AND Lpcat2 <= 20 AND Tcf7 > 45 AND C1qa <= 2 AND Cd3e > 0 AND Gc <= 0 AND Ins2 <= 0 AND Ttr <= 0 AND Mobp <= 0 AND Sfn <= 32 AND Cx3cr1 <= 0 AND Fcrls <= 0 AND Sycn <= 0 AND Krt6a <= 0 AND Ptprc > 0 AND Dmkn <= 0 AND C1qc > 2 AND Ctsd > 7	Thymus
Rule722	Ptprcap > 8 AND Cela2a <= 0 AND Tmem119 <= 4 AND Lpcat2 <= 20 AND Tcf7 > 45 AND C1qc <= 2 AND Cd3e > 0 AND Ctsd <= 2374 AND Gc <= 0 AND Trem2 <= 0 AND Tcf7 > 2413	Thymus
Rule723	Ptprcap > 8 AND Cela2a <= 0 AND Tmem119 <= 4 AND Lpcat2 <= 20 AND Tcf7 > 45 AND C1qc <= 2 AND Cd3e > 0 AND Ctsd <= 2374 AND Gc <= 0 AND Trem2 <= 0 AND Cd79b <= 340 AND Ptprc <= 2432 AND Chga <= 0 AND Cdh1 > 0 AND Coro1a > 880	Thymus
Rule724	Ptprcap > 8 AND Cela2a <= 0 AND Tmem119 <= 4 AND Lpcat2 <= 20 AND Cd3e <= 1 AND Dmbt1 <= 0 AND Epcam <= 3 AND Ttr <= 0 AND Cd8b1 > 14 AND Cd3g > 25 AND Cd79b <= 10 AND Aqp3 <= 0 AND Ptprcap > 94 AND Coro1a <= 2295	Spleen
Rule725	Ptprcap > 6 AND Cela2a <= 0 AND Lpcat2 <= 20 AND Tmem119 <= 3 AND Tcf7 > 45 AND C1qc <= 2 AND Cd3e > 1 AND Ctsd <= 2374 AND Gc <= 0 AND Trem2 <= 0 AND Chga <= 0 AND Ins2 <= 1 AND Perp <= 0 AND Klk1 <= 0 AND Cx3cr1 <= 0 AND Mobp <= 0 AND Fcrls <= 0 AND Cd79b > 260 AND Ckmt1 <= 0 AND Krt5 <= 0 AND Epcam <= 23 AND 2210415F13Rik <= 0 AND Ptprcap > 133 AND C1qb <= 0 AND Ptprcap > 528	Spleen
Rule726	Ptprcap > 6 AND Cela2a <= 0 AND Lpcat2 <= 20 AND Tmem119 <= 3 AND Tcf7 > 45 AND C1qc <= 2 AND Cd79b <= 340 AND Cd3e > 1 AND Gc <= 0 AND Trem2 <= 0 AND Ctsd <= 2376 AND Chga <= 0 AND Klk1 <= 0 AND Fcrls <= 0 AND Ptprc <= 2432 AND Gpr34 > 30 AND Lpcat2 <= 0 AND Ins2 <= 0 AND Cd3e > 33	Spleen
Rule727	Ptprcap > 8 AND Gpr34 > 30 AND Serpinb5 > 0 AND P2ry12 <= 0	Lung
Rule728	Ptprcap > 8 AND Gpr34 > 30 AND Ttr > 0 AND C1qc <= 0	Spleen
Rule729	Ptprcap > 8 AND Gpr34 > 30 AND Cd3e > 111 AND Lpcat2 > 0	Thymus
Rule730	Ptprcap > 8 AND Gpr34 > 30 AND Asb5 <= 0 AND Serpinb5 <= 1 AND Sfn > 0	Muscle
Rule731	Ptprcap > 8 AND Gpr34 > 30 AND Asb5 <= 0 AND Serpinb5 <= 1 AND 2210415F13Rik <= 0 AND Krt5 > 0 AND Laptm5 <= 1410	Fat
Rule732	Ptprcap > 8 AND Gpr34 > 30 AND Serpinb5 <= 1 AND Asb5 <= 0 AND 2210415F13Rik <= 0 AND P2ry13 <= 34 AND 2210010C04Rik <= 41 AND Ctsd > 622 AND Cd8a <= 272	Heart
Rule733	Ptprcap > 8 AND Gpr34 > 30 AND 2210415F13Rik <= 0 AND Serpinb5 <= 1 AND Asb5 <= 0 AND Lgals4 <= 0 AND P2ry13 > 34	Marrow
Rule734	Ptprcap > 8 AND Gpr34 > 30 AND 2210415F13Rik <= 0 AND Serpinb5 <= 1 AND Asb5 <= 0 AND Lgals4 <= 0 AND Cx3cr1 > 0 AND Cd8a <= 663	Heart
Rule735	Ptprcap > 8 AND Gpr34 > 30 AND 2210415F13Rik <= 0 AND Serpinb5 <= 1 AND Asb5 <= 0 AND Lgals4 <= 0 AND Guca2a <= 0 AND 2210010C04Rik <= 54 AND C1qb <= 0 AND Krt15 <= 0 AND Ptprcap <= 643 AND Cd79b <= 156	Trachea
Rule736	Ptprcap > 8 AND Tmem119 <= 4 AND Cela2a <= 0 AND Lpcat2 <= 20 AND Cd3e > 1 AND Ins2 <= 0 AND Lpcat2 > 2 AND Ctsd <= 217	Muscle
Rule737	Ptprcap > 8 AND Tmem119 <= 4 AND Cela2a <= 0 AND Lpcat2 <= 14 AND Cd3e > 1 AND Ins2 <= 0 AND Gc <= 0 AND Krt14 <= 3 AND Tcf7 > 40 AND Sfn > 32 AND Cd79b <= 1	Muscle
Rule738	Ptprcap > 8 AND Tmem119 <= 4 AND Cela2a <= 0 AND Lpcat2 <= 14 AND Cd3e > 1 AND Ins2 <= 0 AND Gc <= 0 AND Krt14 <= 3 AND Tcf7 > 40 AND Csf1r > 2 AND Cd3g > 134	Fat
Rule739	Ptprcap > 8 AND Tmem119 <= 4 AND Cela2a <= 0 AND Lpcat2 <= 14 AND Cd3e > 1 AND Ins2 <= 0 AND Gc <= 0 AND Krt14 <= 3 AND Tcf7 > 40 AND Cd79b > 340 AND Krt15 <= 0 AND 2210415F13Rik <= 0 AND Ptprcap > 133 AND Ccr9 <= 0 AND Rac2 > 724 AND Tcf7 > 47	Marrow
Rule740	Ptprcap > 8 AND Tmem119 <= 4 AND Cela2a <= 0 AND Lpcat2 <= 14 AND Cd3e > 1 AND Tcf7 > 44 AND Cd3e > 381 AND Ins2 <= 32 AND Aqp3 <= 153 AND Klk1 <= 0 AND Cpa1 <= 0 AND Krt14 <= 0 AND Rac2 <= 11348	Thymus
Rule741	Ptprcap > 8 AND Tmem119 <= 4 AND Cela2a <= 0 AND Lpcat2 <= 14 AND Cd3e > 1 AND Gc > 0 AND Lgals7 <= 0 AND Lpcat2 <= 0 AND Krt14 <= 1 AND C1qc <= 2 AND P2ry13 <= 0 AND Aqp3 <= 65 AND Cd3e > 41 AND Ctsd <= 487	Thymus
Rule742	Ptprcap > 8 AND Tmem119 <= 4 AND Cela2a <= 0 AND Lpcat2 <= 14 AND Cd3e > 1 AND Gc > 0 AND Lgals7 <= 0 AND Lpcat2 <= 0 AND Krt14 <= 1 AND C1qc <= 2 AND P2ry13 <= 0 AND Aqp3 <= 65 AND Cd3g <= 352 AND Cd3d > 22	Marrow
Rule743	Ptprcap > 8 AND Tmem119 <= 4 AND Cela2a <= 0 AND Lpcat2 <= 14 AND Cd3e > 1 AND Gc > 0 AND Cd8b1 <= 23 AND Chga <= 0 AND Lgals7 <= 0 AND Sfn <= 0 AND Laptm5 <= 558	Spleen
Rule744	Ptprcap > 8 AND Tmem119 <= 4 AND Cela2a <= 0 AND Lpcat2 <= 14 AND Cd3e > 1 AND Gc > 0 AND Aqp3 <= 0 AND Krt5 <= 1 AND Cd8a <= 0	Liver
Rule745	Ptprcap > 8 AND Tmem119 <= 4 AND Cela2a <= 0 AND Lpcat2 <= 14 AND Cd3e > 1 AND Ins2 <= 0 AND Krt14 <= 3 AND Lgmn <= 6 AND Krt5 <= 0 AND Krt15 <= 1 AND Mobp > 0 AND Myb <= 2 AND Krt15 <= 0 AND C1qb <= 0 AND Cd8a <= 487	Spleen
Rule746	Ptprcap > 8 AND Tmem119 <= 4 AND Cela2a <= 0 AND Lpcat2 <= 14 AND Cd3e > 1 AND Ins2 <= 0 AND Krt14 <= 3 AND Mobp <= 0 AND Tcf7 > 40 AND Ttr <= 0 AND Sycn <= 0 AND Perp <= 0 AND Klk1 > 0 AND Krt14 <= 0 AND Cd8b1 <= 176	Thymus
Rule747	Ptprcap > 8 AND Tmem119 <= 4 AND Cela2a <= 0 AND Lpcat2 <= 14 AND Cd3e > 1 AND Ins2 <= 0 AND Krt14 <= 3 AND Mobp <= 0 AND Tcf7 > 41 AND Ttr <= 0 AND Sycn <= 0 AND Perp <= 0 AND Cx3cr1 <= 0 AND Dmkn <= 0 AND Chga <= 0 AND Krt5 <= 0 AND Fcrls <= 0 AND Ccr9 > 0 AND Cd79b <= 147 AND 2210415F13Rik <= 0 AND P2ry12 <= 0 AND Cd3e <= 38 AND Cd3g > 31 AND Ctsd <= 618 AND C1qb <= 2 AND Myb <= 44 AND Tcf7 <=…	Thymus
Rule748	Ptprcap > 8 AND Tmem119 <= 4 AND Cela2a <= 0 AND Lpcat2 <= 14 AND Cd3e > 1 AND Ins2 <= 0 AND Krt14 <= 3 AND Mobp <= 0 AND Tcf7 > 41 AND Ttr <= 0 AND Cx3cr1 <= 0 AND Siglech > 1 AND Lgmn <= 0	Fat
Rule749	Ptprcap > 8 AND Tmem119 <= 4 AND Cela2a <= 0 AND Lpcat2 <= 14 AND Cd3e > 1 AND Ins2 <= 0 AND Mobp <= 0 AND Krt14 <= 3 AND Tcf7 > 41 AND Ttr <= 0 AND Cx3cr1 <= 0 AND Sycn <= 0 AND Dmkn <= 0 AND Krt15 > 2 AND Lgals7 <= 0 AND Mbp <= 9	Fat
Rule750	Ptprcap > 8 AND Tmem119 <= 4 AND Cela2a <= 0 AND Lpcat2 <= 14 AND Cd3e > 1 AND Fcrls > 3 AND Cd3d <= 227	Liver
Rule751	Ptprcap > 8 AND Tmem119 <= 4 AND Cela2a <= 0 AND Lpcat2 <= 14 AND Cd3e > 1 AND Ins2 <= 0 AND Krt14 <= 3 AND Mobp <= 0 AND Tcf7 > 41 AND Ttr <= 0 AND Cx3cr1 <= 0 AND Sycn <= 0 AND Dmkn <= 0 AND Chga <= 0 AND Perp <= 0 AND Krt5 <= 0 AND Cd3g > 727 AND Serpinb5 <= 0 AND Fcrls <= 0 AND Aqp3 <= 10 AND Ptprcap <= 209 AND Cd3g > 763	Spleen
Rule752	Ptprcap > 8 AND Tmem119 <= 4 AND Cela2a <= 0 AND Lpcat2 <= 14 AND Cd3e > 1 AND Ins2 <= 0 AND Krt14 <= 3 AND Mobp <= 0 AND Lgmn <= 6 AND Krt5 <= 0 AND Cd3g > 728 AND Cldn7 <= 0 AND Lpcat2 <= 2 AND Tspan8 <= 0 AND C1qa <= 1 AND Cldn3 <= 0 AND Serpinb5 > 0	Thymus
Rule753	Ptprcap > 8 AND Tmem119 <= 4 AND Cela2a <= 0 AND Lpcat2 <= 14 AND Cd3e > 1 AND Ins2 <= 0 AND Krt14 <= 3 AND Mobp <= 0 AND Tcf7 > 41 AND Ttr <= 0 AND Sycn <= 0 AND Cx3cr1 <= 0 AND Dmkn <= 0 AND Chga <= 0 AND Perp <= 0 AND Cd3g > 727 AND Aqp3 <= 10 AND Fcrls <= 0 AND Hpgds > 4	Spleen
Rule754	Ptprcap > 8 AND Tmem119 <= 4 AND Cela2a <= 0 AND Lpcat2 <= 14 AND Cd3e > 1 AND Ins2 <= 0 AND Krt14 <= 3 AND Mobp <= 0 AND Cd3g > 728 AND Lpcat2 <= 2 AND Tspan8 <= 0 AND P2ry13 <= 0 AND Lgmn <= 172 AND Cldn3 <= 0 AND C1qa <= 1 AND Ptprcap > 221 AND Chga <= 0 AND Dmkn <= 0 AND Oit1 <= 0 AND Ptprc <= 1809 AND Aqp3 <= 2 AND Fcrls <= 0 AND Lpcat2 <= 0 AND Cd8b1 > 1068 AND Sfn <= 2 AND Tmem119 <= 1 AND…	Spleen
Rule755	Ptprcap > 8 AND Tmem119 <= 4 AND Cela2a <= 0 AND Lpcat2 <= 14 AND Cd3e <= 1 AND Cd8b1 > 14 AND Gpr34 > 0 AND Ptprcap > 80	Thymus
Rule756	Ptprcap > 8 AND Tmem119 <= 4 AND Cela2a <= 0 AND Lpcat2 <= 14 AND Cd3e <= 1 AND Lpcat2 > 6 AND Cx3cr1 <= 0 AND Ttr <= 0 AND Tcf7 <= 0 AND Epcam <= 3	Spleen
Rule757	Ptprcap > 8 AND Tmem119 <= 4 AND Cela2a <= 0 AND Lpcat2 <= 14 AND Cd3e <= 1 AND Lpcat2 > 5 AND Cx3cr1 <= 0 AND Ttr <= 0 AND Tcf7 <= 0	Liver
Rule758	Ptprcap > 8 AND Tmem119 <= 4 AND Cela2a <= 0 AND Lpcat2 <= 11 AND Cd3e <= 1 AND Epcam <= 8 AND Dmbt1 <= 0 AND Cd3e <= 0 AND Cd8a <= 0 AND Cd79b > 1 AND Anxa8 <= 0 AND Krt6a <= 0 AND Gc <= 0 AND Krt15 <= 2 AND Ttr <= 0 AND Cd79b <= 409 AND Lpcat2 > 0 AND Hexb > 0	Marrow
Rule759	Ptprcap > 8 AND Tmem119 <= 4 AND Cela2a <= 0 AND Lpcat2 <= 11 AND Cd3e <= 1 AND Epcam <= 8 AND Dmbt1 <= 0 AND Cd3e <= 0 AND Cd8a <= 0 AND Cd79b > 1 AND Anxa8 <= 0 AND Krt6a <= 0 AND Gc <= 0 AND Krt15 <= 2 AND Ttr <= 0 AND Cd79b <= 409 AND Dsp > 0 AND Ptprcap <= 136	Muscle
Rule760	Ptprcap > 8 AND Tmem119 <= 4 AND Cela2a <= 0 AND Lpcat2 <= 11 AND Cd3e <= 1 AND Epcam <= 8 AND Dmbt1 <= 0 AND Cd3e <= 0 AND Cd8a <= 0 AND Cd79b > 1 AND Anxa8 <= 0 AND Krt6a <= 0 AND Gc <= 0 AND Krt15 <= 2 AND Ttr <= 0 AND Cd79b <= 409 AND Mbp <= 5 AND Cx3cr1 <= 0 AND Lgals4 > 0 AND Cldn7 <= 0 AND Sfn <= 33 AND Lgmn <= 319 AND C1qc <= 0 AND Lgals4 > 1	Spleen
Rule761	Ptprcap > 8 AND Tmem119 <= 4 AND Cela2a <= 0 AND Lpcat2 <= 11 AND Cd3e <= 1 AND Epcam <= 8 AND Dmbt1 <= 0 AND Cd3e <= 0 AND Cd8a <= 0 AND Cd79b > 1 AND Anxa8 <= 0 AND Krt6a <= 0 AND Gc <= 0 AND Krt15 <= 2 AND Ttr <= 0 AND Cd79b <= 409 AND Mbp <= 5 AND Lgals4 > 0 AND C1qb <= 0 AND Sfn <= 24 AND 2210415F13Rik <= 1 AND Lgmn <= 56	Marrow
Rule762	Ptprcap > 8 AND Tmem119 <= 4 AND Cela2a <= 0 AND Lpcat2 <= 11 AND Cd3e <= 1 AND Epcam <= 8 AND Dmbt1 <= 0 AND Cd3e <= 0 AND Cd8a <= 0 AND Cd79b > 1 AND Anxa8 <= 0 AND Krt6a <= 0 AND Gc <= 0 AND Cd79b <= 409 AND Pigr <= 41 AND Ttr > 0 AND Ctsd <= 42	Spleen
Rule763	Ptprcap > 8 AND Tmem119 <= 4 AND Cela2a <= 0 AND Lpcat2 <= 11 AND Cd3e <= 1 AND Epcam <= 8 AND Dmbt1 <= 0 AND Cd3e <= 0 AND Cd8a <= 0 AND Ttr <= 0 AND Cd79b > 1 AND Anxa8 <= 0 AND Krt6a <= 0 AND Gc <= 0 AND Cd79b <= 409 AND Mbp <= 5 AND Cx3cr1 <= 0 AND Dsp <= 0 AND Sfn > 0 AND 2210415F13Rik <= 0 AND Lgals4 <= 0 AND Krt19 <= 0 AND Cd3g <= 0 AND Csf1r > 0	Fat
Rule764	Ptprcap > 8 AND Tmem119 <= 4 AND Cela2a <= 0 AND Lpcat2 <= 11 AND Cd3e <= 1 AND Epcam <= 8 AND Dmbt1 <= 0 AND Cd3e <= 0 AND Cd8a <= 0 AND Ttr <= 0 AND Cd79b > 1 AND Anxa8 <= 0 AND Krt6a <= 0 AND Gc <= 0 AND Cd79b <= 409 AND Mbp <= 5 AND Cx3cr1 <= 0 AND Dsp <= 0 AND Sfn > 0 AND 2210415F13Rik <= 0 AND Lgals4 <= 0 AND Krt19 <= 0 AND Csf1r <= 0 AND Cd3g <= 0 AND Cldn7 <= 0 AND Krt8 > 0 AND Hpgds <= 3	Spleen
Rule765	Ptprcap > 8 AND Tmem119 <= 4 AND Cela2a <= 0 AND Lpcat2 <= 11 AND Cd3e <= 1 AND Epcam <= 8 AND Dmbt1 <= 0 AND Cd3e <= 0 AND Cd8a <= 0 AND Ttr <= 0 AND Cd79b > 1 AND Anxa8 <= 0 AND Krt6a <= 0 AND Gc <= 0 AND Cd79b <= 409 AND Mbp <= 5 AND Cx3cr1 <= 0 AND Dsp <= 0 AND Sfn > 0 AND 2210415F13Rik <= 0 AND Lgals4 <= 0 AND Krt19 <= 0 AND Csf1r <= 0 AND Cd3g <= 0 AND Cldn7 <= 0 AND Krt8 <= 0 AND Coro1a <=…	Muscle
Rule766	Ptprcap > 8 AND Tmem119 <= 4 AND Cela2a <= 0 AND Lpcat2 <= 11 AND Cd3e <= 1 AND Dmbt1 <= 0 AND Cd8b1 > 14 AND Gpr34 <= 0 AND Cd3e <= 0 AND Trim29 <= 0 AND Cd8a <= 24	Marrow
Rule767	Ptprcap > 8 AND Tmem119 <= 4 AND Cela2a <= 0 AND Lpcat2 <= 11 AND Cd3e <= 1 AND Cd8b1 > 12 AND Gpr34 <= 0 AND 2210415F13Rik <= 0	Fat
Rule768	Ptprcap > 8 AND Tmem119 <= 4 AND Cela2a <= 0 AND Lpcat2 <= 11 AND Cd3e <= 1 AND Dmbt1 <= 0 AND Epcam <= 8 AND Cd3e <= 0 AND Cd8a <= 0 AND Ttr <= 0 AND Cd79b > 1 AND Anxa8 <= 0 AND Krt6a <= 0 AND Gc <= 0 AND Cd79b <= 1008 AND Lypd3 > 0 AND Gpr34 > 0	Lung
Rule769	Ptprcap > 8 AND Tmem119 <= 4 AND Cela2a <= 0 AND Lpcat2 <= 11 AND Cd3e <= 1 AND Epcam <= 8 AND Dmbt1 <= 0 AND Cd3e <= 0 AND Cd8a <= 0 AND Ttr <= 0 AND Cd79b > 1 AND Anxa8 <= 0 AND Krt6a <= 0 AND Gc <= 0 AND Cd79b <= 1008 AND Chodl > 0 AND Coro1a > 343	Fat
Rule770	Ptprcap > 8 AND Tmem119 <= 4 AND Cela2a <= 0 AND Lpcat2 <= 11 AND Cd3e <= 1 AND Epcam <= 8 AND Dmbt1 <= 0 AND Cd3e <= 0 AND Cd8a <= 0 AND Ttr <= 0 AND Cd79b > 1 AND Anxa8 <= 0 AND Krt6a <= 0 AND Gc <= 0 AND Cd79b <= 1008 AND Cd3d > 0 AND Hexb <= 117 AND Krt5 <= 1	Marrow
Rule771	Ptprcap > 8 AND Tmem119 <= 4 AND Cela2a <= 0 AND Lpcat2 <= 11 AND Cd3e <= 1 AND Epcam <= 8 AND Dmbt1 <= 0 AND Cd3e <= 0 AND Cd8a <= 0 AND Ttr <= 0 AND Cd79b > 1 AND Anxa8 <= 0 AND Krt6a <= 0 AND Gc <= 0 AND Cd79b <= 1008 AND Lgmn > 116 AND Tmem119 <= 1 AND Gpr34 <= 0 AND Chga <= 0 AND Dmkn <= 0 AND Cldn7 <= 0 AND Krt15 <= 2 AND Mobp <= 0 AND Lpcat2 <= 1 AND Mbp <= 0 AND Krt19 <= 0 AND Lgals4 <= 1…	Spleen
Rule772	Ptprcap > 8 AND Tmem119 <= 4 AND Cela2a <= 0 AND Lpcat2 <= 11 AND Cd3e <= 1 AND Epcam <= 8 AND Dmbt1 <= 0 AND Cd3e <= 0 AND Cd8a <= 0 AND Ttr <= 0 AND Cd79b > 1 AND Anxa8 <= 0 AND Krt6a <= 0 AND Gc <= 0 AND Krt15 <= 1 AND Krt14 <= 0 AND Krt5 > 0 AND Tmem45b <= 0 AND C1qa <= 0 AND Krt17 <= 0 AND Krt8 <= 0 AND Hexb <= 131 AND Laptm5 > 265	Fat
Rule773	Ptprcap > 8 AND Tmem119 <= 4 AND Cela2a <= 0 AND Lpcat2 <= 11 AND Cd3e <= 1 AND Epcam <= 8 AND Dmbt1 <= 0 AND Cd3e <= 0 AND Cd8a <= 0 AND Ttr <= 0 AND Cd79b > 1 AND Anxa8 <= 0 AND Krt6a <= 0 AND Gc <= 0 AND Krt15 <= 1 AND Krt14 <= 0 AND Tmem119 > 1 AND Mobp <= 0 AND C1qb <= 3 AND C1qc <= 1 AND Ptprcap <= 469	Spleen
Rule774	Ptprcap > 8 AND Tmem119 <= 4 AND Cela2a <= 0 AND Lpcat2 <= 11 AND Cd3e <= 1 AND Epcam <= 8 AND Dmbt1 <= 0 AND Cd3e <= 0 AND Cd8a <= 0 AND Ttr <= 0 AND Cd79b > 1 AND Anxa8 <= 0 AND Krt6a <= 0 AND Gc <= 0 AND Tmem119 <= 1 AND Krt15 <= 1 AND Cd79b <= 1008 AND Lgmn > 116 AND Krt15 <= 0 AND Mobp <= 0 AND Mbp <= 0 AND Krt19 <= 0 AND Lgals4 <= 1 AND Krt8 <= 0 AND Coro1a > 382 AND Epcam <= 0 AND Ptprc <=…	Spleen
Rule775	Chodl > 2 AND Scel <= 0 AND Tmem119 <= 14 AND Foxf1a <= 36 AND Dmbt1 <= 2 AND Cdh17 <= 0 AND Ccr9 <= 4 AND Pkp1 <= 4 AND Dsp <= 8 AND Phgr1 <= 0 AND Cldn3 <= 7 AND Lpcat2 <= 6 AND Oit1 <= 0 AND Epcam <= 1 AND Guca2a <= 0 AND Dmbt1 <= 0 AND Hpgds <= 15 AND Pitx1 <= 0 AND Pkp1 <= 0 AND Rnase1 <= 0 AND Clca2 <= 0 AND Pigr <= 0 AND Ptprcap <= 2 AND Foxf1a <= 3 AND Klk1 <= 0 AND 2210415F13Rik <= 0 AND…	Muscle
Rule776	Ptprcap > 8 AND Tmem119 <= 4 AND Cela2a <= 0 AND Lpcat2 <= 11 AND Cd3e <= 1 AND Epcam <= 8 AND Dmbt1 <= 0 AND Cd3e <= 0 AND Cd8a <= 0 AND Ttr <= 0 AND Cd79b > 1 AND Gpx2 > 0 AND P2ry12 <= 0 AND Krt14 <= 1	Marrow
Rule777	Ptprcap > 8 AND Tmem119 <= 4 AND Cela2a <= 0 AND Lpcat2 <= 11 AND Cd3e <= 1 AND Epcam <= 8 AND Dmbt1 <= 0 AND Cd3e <= 0 AND Cd8a <= 0 AND Ttr <= 0 AND Cd79b > 1 AND Anxa8 <= 0 AND Krt6a <= 0 AND Gc <= 0 AND Tmem119 <= 1 AND Krt15 <= 1 AND Cd79b > 1008 AND Try4 <= 0 AND Pnlip <= 0 AND Sfn <= 432 AND Them5 > 0	Fat
Rule778	Ptprcap > 8 AND Tmem119 <= 4 AND Cela2a <= 0 AND Lpcat2 <= 11 AND Cd3e <= 1 AND Epcam <= 8 AND Dmbt1 <= 0 AND Cd3e <= 0 AND Cd8a <= 0 AND Ttr <= 0 AND Cd79b > 1 AND Anxa8 <= 0 AND Krt6a <= 0 AND Gc <= 0 AND Tmem119 <= 1 AND Krt15 <= 1 AND Cd79b > 1008 AND Klk1 > 0 AND Sfn <= 19	Kidney
Rule779	Ptprcap > 8 AND Tmem119 <= 4 AND Cela2a <= 0 AND Lpcat2 <= 11 AND Cd3e <= 1 AND Epcam <= 8 AND Dmbt1 <= 0 AND Cd3e <= 0 AND Cd8a <= 0 AND Ttr <= 0 AND Cd79b > 1 AND Anxa8 <= 0 AND Krt6a <= 0 AND Gc <= 0 AND Tmem119 <= 1 AND Krt15 <= 1 AND Cd79b > 1008 AND Try4 <= 0 AND Pnlip <= 0 AND Sfn <= 432 AND Ckmt1 <= 0 AND Tmem45b <= 0 AND Csf1r <= 1 AND P2ry13 <= 0 AND Scgn <= 0 AND Clca2 <= 0 AND C1qc > …	Spleen
Rule780	Ptprcap > 8 AND Tmem119 <= 4 AND Cela2a <= 0 AND Lpcat2 <= 11 AND Cd3e <= 1 AND Epcam <= 8 AND Dmbt1 <= 0 AND Cd3e <= 0 AND Cd8a <= 0 AND Ttr <= 0 AND Cd79b > 1 AND Anxa8 <= 0 AND Krt6a <= 0 AND Gc <= 0 AND Tmem119 <= 1 AND Krt15 <= 1 AND Cd79b > 1008 AND Try4 <= 0 AND Pnlip <= 0 AND Sfn <= 432 AND Ckmt1 <= 0 AND Tmem45b <= 0 AND Csf1r <= 1 AND P2ry13 <= 0 AND Scgn <= 0 AND C1qc <= 0 AND Cx3cr1 <…	Spleen
Rule781	Ptprcap > 8 AND Tmem119 <= 4 AND Cela2a <= 0 AND Lpcat2 <= 11 AND Cd3e > 1 AND Ins2 <= 0 AND Krt14 <= 3 AND Mobp <= 0 AND Cd3g > 728 AND Cldn7 <= 0 AND Tspan8 <= 0 AND Lpcat2 <= 2 AND Lgmn <= 172 AND Cldn3 <= 0 AND C1qa <= 1 AND Trp63 <= 0 AND Oit1 <= 0 AND Cd3d > 124 AND Trim29 <= 0 AND Dmbt1 <= 1 AND Aqp3 > 2 AND Cd3e <= 82	Thymus
Rule782	Ptprcap > 8 AND Tmem119 <= 4 AND Cela2a <= 0 AND Lpcat2 <= 11 AND Cd3e > 1 AND Ins2 <= 0 AND Krt14 <= 3 AND Mobp <= 0 AND Cd3g > 728 AND Aqp3 <= 85 AND Tspan8 <= 0 AND Lgmn <= 172 AND Cldn3 <= 0 AND C1qa <= 1 AND Trp63 <= 0 AND Oit1 <= 0 AND Siglech <= 0 AND Cd3d > 124 AND Dmbt1 <= 1 AND Ptprc <= 1381 AND Myb <= 130 AND Krt15 <= 1 AND C1qc <= 1 AND Krt15 <= 0 AND Perp <= 0 AND Krt14 <= 1 AND Ctsd…	Thymus
Rule783	Ptprcap > 8 AND Tmem119 <= 4 AND Cela2a <= 0 AND Lpcat2 <= 11 AND Cd3e <= 1 AND Epcam <= 8 AND Dmbt1 <= 0 AND Cd3e <= 0 AND Myb > 6 AND Fcrls <= 0 AND Ptprc <= 1061 AND Tcf7 <= 47 AND Krt15 <= 0 AND Cd79b <= 15	Marrow
Rule784	Ptprcap > 8 AND Tmem119 <= 4 AND Cela2a <= 0 AND Lpcat2 <= 11 AND Cd3e <= 1 AND Epcam <= 8 AND Dmbt1 <= 0 AND Cd3e <= 0 AND Cd8a <= 0 AND Ttr <= 0 AND Cd79b > 1 AND Anxa8 <= 0 AND Krt6a <= 0 AND Gc <= 0 AND Tmem119 <= 1 AND Cd79b <= 1002 AND Lgmn > 116 AND Cldn7 <= 0 AND Gpr34 <= 0 AND Krt15 <= 0 AND Rac2 <= 334 AND Mbp <= 0	Spleen
Rule785	Ptprcap > 8 AND Tmem119 <= 4 AND Cela2a <= 0 AND Lpcat2 <= 11 AND Cd3e > 1 AND Ins2 <= 0 AND Krt14 <= 3 AND Mobp <= 0 AND Cd3g > 728 AND Aqp3 <= 85 AND Tspan8 <= 0 AND Lgmn <= 172 AND Cldn3 <= 0 AND C1qa <= 1 AND Trp63 <= 0 AND Chga <= 0 AND Oit1 <= 0 AND Cd3d > 124 AND Siglech <= 0 AND Dmbt1 <= 1 AND Ptprc <= 1469 AND Myb <= 130 AND Perp <= 0 AND P2ry12 <= 0 AND C1qc <= 1 AND Krt15 <= 0 AND Krt1…	Thymus
Rule786	Ptprcap > 8 AND Tmem119 <= 4 AND Cela2a <= 0 AND Lpcat2 <= 11 AND Cd3e > 1 AND Ins2 <= 0 AND Krt14 <= 3 AND Mobp <= 0 AND Krt5 <= 0 AND Cd3g > 728 AND Aqp3 <= 85 AND Tspan8 <= 0 AND Cldn3 <= 0 AND C1qa <= 1 AND Siglech <= 0 AND Laptm5 > 24 AND Oit1 <= 0 AND Cd3d > 124 AND Dmbt1 <= 1 AND Trem2 <= 0 AND Fcrls <= 0 AND Ptprc <= 1273 AND Cd3e <= 177 AND Prss2 <= 762 AND Perp <= 0 AND Epcam <= 1 AND K…	Thymus
Rule787	Ptprcap > 8 AND Tmem119 <= 4 AND Cela2a <= 0 AND Lpcat2 <= 11 AND Cd3e <= 1 AND Dmbt1 <= 0 AND Epcam <= 8 AND Cd3e <= 0 AND Cd8a <= 0 AND Ttr <= 0 AND Cd79b > 1 AND Anxa8 <= 0 AND Krt6a <= 0 AND Gc <= 0 AND Tmem119 <= 1 AND Cd79b <= 1002 AND Lgmn > 116 AND Cldn7 <= 0 AND Rac2 <= 330 AND Mbp <= 71 AND Lgmn <= 375	Liver
Rule788	Ptprcap > 8 AND Tmem119 <= 4 AND Cela2a <= 0 AND Lpcat2 <= 11 AND Cd3e <= 1 AND Epcam <= 8 AND Cd8b1 <= 4 AND Dmbt1 <= 0 AND Cd8a > 0 AND Rac2 > 0 AND Cd79b <= 1772 AND B4galnt2 <= 0 AND Krt14 <= 3 AND Capns2 <= 0 AND Ttr <= 0 AND Cd8b1 <= 0 AND Epcam <= 0	Fat
Rule789	Ptprcap > 8 AND Tmem119 <= 4 AND Cela2a <= 0 AND Lpcat2 <= 11 AND Cd3e <= 1 AND Epcam <= 8 AND Cd8b1 <= 4 AND Cd8a > 0 AND Ctsd > 0 AND Cx3cr1 <= 0	Marrow
Rule790	Ptprcap > 8 AND Tmem119 <= 4 AND Cela2a <= 0 AND Lpcat2 <= 11 AND Cd3e <= 1 AND Cd8a <= 0 AND Epcam <= 8 AND Dmbt1 <= 0 AND Ttr <= 0 AND Cd79b > 1 AND Anxa8 <= 0 AND Gc <= 0 AND Krt6a <= 0 AND Tmem119 <= 1 AND Krt15 <= 1 AND Cd79b <= 1002 AND Ins2 <= 0 AND Fosl1 > 0 AND Krt8 <= 0	Kidney
Rule791	Ptprcap > 8 AND Tmem119 <= 4 AND Cela2a <= 0 AND Lpcat2 <= 11 AND Cd3e <= 1 AND Cd8a <= 0 AND Epcam <= 8 AND Dmbt1 <= 0 AND Ttr <= 0 AND Cd79b > 1 AND Anxa8 <= 0 AND Gc <= 0 AND Krt6a <= 0 AND Tmem119 <= 1 AND Krt15 <= 1 AND Fcrls > 1 AND Gpr34 <= 0 AND Cx3cr1 <= 1	Muscle
Rule792	Ptprcap > 8 AND Tmem119 <= 4 AND Cela2a <= 0 AND Lpcat2 <= 11 AND Cd3e <= 1 AND Cd8a <= 0 AND Epcam <= 8 AND Dmbt1 <= 0 AND Ttr <= 0 AND Cd79b > 1 AND Anxa8 <= 0 AND Gc <= 0 AND Krt6a <= 0 AND Tmem119 <= 1 AND Krt15 <= 1 AND Cd79b <= 1002 AND Cd79b > 104 AND Cd3d > 0 AND Hexb <= 117	Muscle
Rule793	Ptprcap > 8 AND Tmem119 <= 4 AND Cela2a <= 0 AND Lpcat2 <= 11 AND Cd3e <= 1 AND Cd8a <= 0 AND Epcam <= 8 AND Dmbt1 <= 0 AND Ttr <= 0 AND Cd79b > 1 AND Anxa8 <= 0 AND Gc <= 0 AND Krt6a <= 0 AND Krt13 > 0 AND Coro1a <= 5021 AND Ctsd <= 275	Spleen
Rule794	Ptprcap > 3 AND Tmem119 <= 4 AND Cela2a > 0 AND Sfn <= 101 AND Cldn7 <= 0 AND Sycn <= 0 AND Lypd3 <= 0 AND Foxf1a <= 5 AND Try4 <= 1 AND Dmkn > 4	Trachea
Rule795	Ptprcap > 3 AND Tmem119 <= 4 AND Lpcat2 <= 9 AND Cela2a > 0 AND Cldn7 > 0	Marrow
Rule796	Ptprcap > 3 AND Tmem119 <= 4 AND Cela2a > 0 AND Sfn <= 101 AND C1qa <= 87 AND Aqp3 > 44	Trachea
Rule797	Ptprcap > 3 AND Tmem119 <= 4 AND Cela2a > 0 AND Sfn > 101	Muscle
Rule798	Ptprcap > 3 AND Tmem119 <= 4 AND Cela2a > 0 AND C1qa <= 87 AND Fosl1 <= 6 AND Capns2 <= 0 AND Foxf1a <= 5 AND Cela3b <= 0 AND Lypd3 > 0	Heart
Rule799	Ptprcap > 3 AND Tmem119 <= 4 AND Cela2a > 0 AND C1qa <= 87 AND Foxf1a <= 5 AND Capns2 <= 0 AND Fosl1 <= 6 AND Cela3b > 0	Heart
Rule800	Ptprcap > 3 AND Tmem119 <= 4 AND Cela2a > 0 AND Foxf1a <= 5 AND Fosl1 <= 6 AND Capns2 <= 0 AND C1qc <= 114 AND Sycn <= 0 AND Myb > 7 AND Mbp <= 32	Trachea
Rule801	Ptprcap > 3 AND Tmem119 <= 4 AND Cela2a > 0 AND Fosl1 <= 6 AND Foxf1a <= 5 AND C1qc <= 114 AND Capns2 <= 0 AND P2ry12 > 0	Marrow
Rule802	Ptprcap > 3 AND Tmem119 <= 4 AND Cela2a > 0 AND Fosl1 <= 6 AND Foxf1a <= 5 AND C1qc <= 114 AND Capns2 <= 0 AND Ptprcap <= 1853 AND Prss2 > 0 AND Tmem27 <= 0	Lung
Rule803	Ptprcap > 3 AND Tmem119 <= 4 AND Cela2a > 0 AND Fosl1 <= 6 AND Foxf1a <= 5 AND Prss2 <= 0 AND Myb <= 74 AND Sycn <= 0 AND C1qb <= 0 AND Ckmt1 <= 0 AND Epcam > 15	Lung
Rule804	Ptprcap > 3 AND Tmem119 <= 4 AND Cela2a > 0 AND Fosl1 <= 6 AND Foxf1a <= 5 AND Prss2 <= 0 AND Myb <= 63 AND Sycn <= 0 AND C1qb <= 0 AND Hpgds <= 51 AND Tm4sf4 > 0	Fat
Rule805	Ptprcap > 3 AND Tmem119 <= 4 AND Lpcat2 <= 11 AND Cd3e > 1 AND Ins2 <= 0 AND Cx3cr1 > 112 AND Epcam > 0	Lung
Rule806	Ptprcap > 3 AND Tmem119 <= 4 AND Lpcat2 <= 11 AND Cd3e > 1 AND Clps <= 0 AND Ins2 <= 0 AND Mobp <= 0 AND Laptm5 <= 14 AND Lgmn <= 10 AND Pkp1 <= 0 AND C1qc <= 0 AND Coro1a > 69	Spleen
Rule807	Ptprcap > 3 AND Tmem119 <= 4 AND Lpcat2 <= 11 AND Cd3e > 1 AND Clps <= 0 AND Ins2 <= 0 AND Laptm5 <= 14 AND Tcf7 <= 15	Liver
Rule808	Ptprcap > 3 AND Tmem119 <= 4 AND Lpcat2 <= 11 AND Cd3e > 1 AND Clps <= 0 AND Ins2 <= 0 AND Mobp <= 0 AND Dmkn <= 0 AND Klk1 <= 0 AND Krt5 <= 0 AND Aqp3 > 4 AND Perp <= 0 AND Sfn <= 3 AND Krt15 <= 0 AND Myb > 10 AND Hexb <= 1	Fat
Rule809	Ptprcap > 3 AND Tmem119 <= 4 AND Lpcat2 <= 11 AND Cd3e > 1 AND Clps <= 0 AND Ins2 <= 0 AND Mobp <= 0 AND Dmkn <= 0 AND Klk1 <= 0 AND Krt5 <= 0 AND Tcf7 > 41 AND Sycn <= 0 AND Ttr <= 0 AND Krt14 > 2 AND P2ry12 <= 0	Heart
Rule810	Ptprcap > 3 AND Tmem119 <= 4 AND Lpcat2 <= 11 AND Cd3e > 1 AND Clps <= 0 AND Ins2 <= 0 AND Mobp <= 0 AND Dmkn <= 0 AND Klk1 <= 0 AND Krt5 <= 0 AND Krt15 <= 1 AND Tcf7 > 41 AND Sycn <= 0 AND Ttr <= 0 AND Cx3cr1 <= 0 AND Phgr1 > 0 AND Hexb <= 24	Marrow
Rule811	Ptprcap > 3 AND Tmem119 <= 4 AND Lpcat2 <= 11 AND Cd3e > 1 AND Clps <= 0 AND Ins2 <= 0 AND Mobp <= 0 AND Dmkn <= 0 AND Klk1 <= 0 AND Krt5 <= 0 AND Krt15 <= 1 AND Tcf7 > 41 AND Sycn <= 0 AND Ttr <= 0 AND Cx3cr1 <= 0 AND Ptprc <= 0 AND Hexb <= 7	Thymus
Rule812	Ptprcap > 3 AND Tmem119 <= 4 AND Lpcat2 <= 11 AND Cd3e > 2 AND Ctrb1 > 0 AND Myb <= 0 AND Cd8a <= 1 AND Cd3d <= 295	Lung
Rule813	Ptprcap > 3 AND Tmem119 <= 4 AND Lpcat2 <= 11 AND Cd3e > 2 AND Ins2 <= 0 AND Mobp <= 0 AND Prss2 > 0 AND Mbp <= 43 AND Ptprc > 264	Thymus
Rule814	Ptprcap > 3 AND Tmem119 <= 4 AND Lpcat2 <= 11 AND Cd3e > 2 AND Ins2 <= 0 AND Mobp <= 0 AND Dmkn <= 0 AND Klk1 <= 0 AND Krt5 <= 0 AND Tcf7 > 40 AND Sycn <= 0 AND Ttr <= 0 AND Coro1a <= 6533 AND Cx3cr1 <= 0 AND Perp <= 0 AND Chga <= 0 AND Fcrls <= 0 AND Krt15 <= 1 AND Epcam <= 302 AND Oit1 <= 0 AND Cd3e <= 183 AND C1qa <= 1 AND Krt8 <= 4 AND Aqp3 <= 41 AND Cd79b > 146 AND Ccr9 <= 0 AND Ptprc <= 425	Spleen
Rule815	Ptprcap > 3 AND Tmem119 <= 4 AND Lpcat2 <= 11 AND Cd3e > 2 AND Ins2 <= 0 AND Mobp <= 0 AND Dmkn <= 0 AND Klk1 <= 0 AND Sfn <= 3 AND Krt5 <= 0 AND Anxa8 <= 0 AND Cx3cr1 <= 0 AND Resp18 > 0 AND Lgmn <= 0	Fat
Rule816	Ptprcap > 3 AND Tmem119 <= 4 AND Lpcat2 <= 11 AND Cd3e > 2 AND Ins2 <= 0 AND Mobp <= 0 AND Dmkn <= 0 AND Klk1 <= 0 AND Sfn <= 3 AND Krt5 <= 0 AND Anxa8 <= 0 AND Cx3cr1 <= 0 AND Slc2a5 > 0 AND Fcrls <= 0	Muscle
Rule817	Ptprcap > 3 AND Tmem119 <= 4 AND Lpcat2 <= 11 AND Cd3e > 2 AND Ins2 <= 0 AND Mobp <= 0 AND Dmkn <= 0 AND Klk1 <= 0 AND Sfn <= 3 AND Krt5 <= 0 AND Anxa8 <= 0 AND Cx3cr1 <= 0 AND Aqp3 > 3 AND Perp <= 0 AND Myb <= 10 AND Krt15 <= 0 AND Ckmt1 <= 0 AND Mbp <= 200 AND Cd3g <= 840 AND Coro1a > 835	Spleen
Rule818	Ptprcap > 3 AND Tmem119 <= 4 AND Aqp3 > 29 AND Ins2 > 0 AND C1qc <= 0 AND Krt15 <= 0 AND Tmem119 <= 0 AND Cd8b1 <= 0 AND P2ry12 <= 1	Trachea
Rule819	Ptprcap > 3 AND Tmem119 <= 4 AND P2ry12 <= 2 AND Cd3e > 2 AND Lpcat2 <= 15 AND Clps > 0 AND Gpr34 <= 3 AND Hexb <= 4 AND Ptprcap <= 140	Fat
Rule820	Ptprcap > 3 AND Tmem119 <= 4 AND P2ry12 <= 2 AND Cd3e > 2 AND Lpcat2 <= 15 AND Ins2 <= 0 AND Mobp <= 0 AND Dmkn <= 0 AND Aqp3 <= 34 AND Klk1 <= 0 AND Tcf7 > 40 AND Cldn3 <= 0 AND Sycn <= 0 AND Cd79b <= 96 AND Laptm5 > 43 AND Cx3cr1 <= 0 AND Lgmn > 209 AND Mbp <= 48	Fat
Rule821	Ptprcap > 3 AND Tmem119 <= 4 AND P2ry12 <= 2 AND Cd3e > 2 AND Lpcat2 <= 15 AND Ins2 <= 0 AND Mobp <= 0 AND Dmkn <= 0 AND Aqp3 <= 34 AND Klk1 <= 0 AND Tcf7 > 40 AND Cd79b <= 96 AND Cldn3 <= 0 AND Sycn <= 0 AND Laptm5 > 43 AND P2ry12 > 1 AND Lgmn <= 0 AND C1qb <= 0	Thymus
Rule822	Ptprcap > 3 AND Tmem119 <= 4 AND P2ry12 <= 2 AND Cd3e > 2 AND Lpcat2 <= 15 AND Ins2 <= 0 AND Mobp <= 0 AND Dmkn <= 0 AND Aqp3 <= 34 AND Klk1 <= 0 AND Tcf7 > 40 AND Cd79b <= 96 AND Cldn3 <= 0 AND Sycn <= 0 AND Perp > 0 AND Sfn <= 0 AND Krt19 <= 0 AND Epcam <= 0 AND Ptprcap <= 623	Fat
Rule823	Ptprcap > 3 AND Tmem119 <= 4 AND P2ry12 <= 2 AND Cd3e > 2 AND Lpcat2 <= 15 AND Ins2 <= 0 AND Mobp <= 0 AND Dmkn <= 0 AND Aqp3 <= 34 AND Klk1 <= 0 AND Tcf7 > 40 AND Cd79b <= 96 AND Cldn3 <= 0 AND Sycn <= 0 AND Cx3cr1 <= 0 AND Chga <= 0 AND Fcrls <= 0 AND Epcam > 302	Thymus
Rule824	Ptprcap > 3 AND Tmem119 <= 4 AND P2ry12 <= 2 AND Cd3e > 2 AND Lpcat2 <= 15 AND Ins2 <= 0 AND Mobp <= 0 AND Dmkn <= 0 AND Aqp3 <= 34 AND Klk1 <= 0 AND Tcf7 > 40 AND Cd79b <= 96 AND Cldn3 <= 0 AND Sycn <= 0 AND Cx3cr1 <= 0 AND Chga <= 0 AND Cd3e <= 183 AND Tmem119 <= 1 AND Oit1 > 0	Thymus
Rule825	Ptprcap > 3 AND Tmem119 <= 4 AND P2ry12 <= 2 AND Cela2a > 0 AND Fosl1 <= 6 AND C1qc <= 113 AND Capns2 <= 0 AND Myb <= 11 AND Prss2 <= 0 AND Hpgds <= 51 AND Cldn3 <= 0 AND Try4 > 0 AND Cela2a <= 1	Fat
Rule826	Ptprcap > 3 AND Tmem119 <= 4 AND P2ry12 <= 2 AND Cd3e > 2 AND Lpcat2 <= 15 AND Ins2 <= 0 AND Mobp <= 0 AND Dmkn <= 0 AND Aqp3 <= 34 AND Klk1 <= 0 AND Tcf7 > 40 AND Cd79b <= 96 AND Cldn3 <= 0 AND Sycn <= 0 AND Cx3cr1 <= 0 AND Chga <= 0 AND Cd3e <= 183 AND Tmem119 <= 1 AND Krt5 <= 0 AND C1qa <= 1 AND Tspan8 <= 0 AND Cd3e > 14 AND Aqp3 > 3 AND Ctsd <= 385	Spleen
Rule827	Ptprcap > 3 AND Tmem119 <= 4 AND P2ry12 <= 2 AND Cd3e > 2 AND Lpcat2 <= 15 AND Ins2 <= 0 AND Mobp <= 0 AND Aqp3 <= 3 AND Dmkn <= 0 AND Klk1 <= 0 AND Tcf7 > 40 AND Cd79b <= 96 AND Cldn3 <= 0 AND Sycn <= 0 AND Cx3cr1 <= 0 AND Chga <= 0 AND Cd3e <= 183 AND Tmem119 <= 1 AND C1qa <= 1 AND Tspan8 <= 0 AND Krt5 <= 0 AND Cd3e > 14 AND Cd8a <= 1384 AND Perp > 0 AND Ptprcap <= 623	Spleen
Rule828	Ptprcap > 3 AND Tmem119 <= 4 AND P2ry12 <= 2 AND Cd3e > 2 AND Lpcat2 <= 15 AND Ins2 <= 0 AND Mobp <= 0 AND Aqp3 <= 3 AND Dmkn <= 0 AND Klk1 <= 0 AND Tcf7 > 40 AND Cd79b <= 96 AND Cldn3 <= 0 AND Sycn <= 0 AND Cx3cr1 <= 0 AND Chga <= 0 AND Cd3e <= 183 AND Tmem119 <= 1 AND C1qa <= 1 AND Tspan8 <= 0 AND Krt5 <= 0 AND Cd3e > 14 AND Cd8a <= 1384 AND Sfn > 0 AND P2ry12 <= 0 AND Tcf7 > 121	Spleen
Rule829	Ptprcap > 3 AND Tmem119 <= 4 AND P2ry12 <= 2 AND Cd3e > 2 AND Lpcat2 <= 15 AND Ins2 <= 0 AND Sfn > 3 AND Cdh1 <= 0 AND Rac2 > 431 AND Laptm5 <= 1006 AND Hexb <= 110	Thymus
Rule830	Ptprcap > 3 AND Tmem119 <= 4 AND P2ry12 <= 2 AND Cd3d > 69 AND Sfn <= 12 AND Lpcat2 > 28 AND Ptprcap > 237 AND Cx3cr1 <= 1 AND Krt17 > 0	Thymus
Rule831	Ptprcap > 3 AND Tmem119 <= 4 AND P2ry12 <= 2 AND Cd3e > 2 AND Lpcat2 <= 15 AND Ins2 <= 0 AND Sfn > 3 AND Cd79b <= 0 AND Ptprcap <= 215	Muscle
Rule832	Ptprcap > 3 AND Tmem119 <= 4 AND P2ry12 <= 2 AND Cd3e > 2 AND Lpcat2 <= 15 AND Ins2 <= 0 AND Aqp3 <= 3 AND Mobp <= 0 AND Dmkn <= 0 AND Klk1 <= 0 AND Krt5 <= 0 AND Siglech <= 0 AND Anxa8 <= 0 AND Sfn <= 0 AND Cx3cr1 <= 0 AND Lgmn <= 54 AND Tcf7 > 40 AND Cd79b <= 96 AND Chga <= 0 AND Fcrls <= 0 AND Krt15 <= 1 AND C1qa <= 1 AND Tspan8 <= 0 AND Cd3e <= 183 AND Cd3g <= 319 AND Cd79b <= 30 AND C1qc <= …	Spleen
Rule833	Ptprcap > 3 AND Tmem119 <= 4 AND P2ry12 <= 2 AND Cd3e > 2 AND Lpcat2 <= 15 AND Ins2 <= 0 AND Aqp3 <= 3 AND Mobp <= 0 AND Dmkn <= 0 AND Klk1 <= 0 AND Krt5 <= 0 AND Siglech <= 0 AND Anxa8 <= 0 AND Sfn <= 0 AND Cx3cr1 <= 0 AND Lgmn <= 54 AND Tcf7 > 40 AND Cd79b <= 96 AND Tspan8 <= 0 AND Chga <= 0 AND Fcrls <= 0 AND C1qa <= 1 AND Cd3e <= 183 AND Cd8a <= 1395 AND Aqp3 > 0 AND Krt17 <= 0 AND Cd8b1 <= 3…	Thymus
Rule834	Ptprcap > 3 AND Tmem119 <= 4 AND P2ry12 <= 2 AND Cd3e > 2 AND Lpcat2 <= 15 AND Ins2 <= 0 AND Aqp3 <= 3 AND Mobp <= 0 AND Dmkn <= 0 AND Klk1 <= 0 AND Krt5 <= 0 AND Siglech <= 0 AND Anxa8 <= 0 AND Sfn <= 0 AND Cx3cr1 <= 0 AND Lgmn <= 54 AND Tcf7 > 40 AND Cd79b <= 96 AND Chga <= 0 AND Tspan8 <= 0 AND Fcrls <= 0 AND C1qa <= 1 AND Cd3e <= 183 AND Cd8a <= 1395 AND Krt14 <= 1 AND Asb5 <= 0 AND Aqp3 <= 0…	Spleen
Rule835	Ptprcap > 3 AND Tmem119 <= 4 AND P2ry12 <= 2 AND Cd3e > 2 AND Lpcat2 <= 15 AND Ins2 <= 0 AND Aqp3 <= 3 AND Mobp <= 0 AND Dmkn <= 0 AND Klk1 <= 0 AND Krt5 <= 0 AND Siglech <= 0 AND Anxa8 <= 0 AND Sfn <= 0 AND Cx3cr1 <= 0 AND Lgmn <= 54 AND Tcf7 > 41 AND C1qa <= 1 AND Cd79b <= 96 AND Chga <= 0 AND Tspan8 <= 0 AND Cd3e <= 183 AND Fcrls <= 0 AND Aqp3 <= 0 AND Cd8a <= 1395 AND C1qc <= 0 AND Krt14 <= 1…	Spleen
Rule836	Ptprcap > 3 AND Tmem119 <= 4 AND P2ry12 <= 2 AND Cd3e > 2 AND Lpcat2 <= 15 AND Ins2 <= 0 AND Aqp3 <= 3 AND Mobp <= 0 AND Dmkn <= 0 AND Klk1 <= 0 AND Krt5 <= 0 AND Siglech <= 0 AND Anxa8 <= 0 AND Tmem119 <= 0 AND Cd3e <= 251 AND Cx3cr1 <= 0 AND Tcf7 > 41 AND Sfn > 0 AND Ptprcap <= 522	Fat
Rule837	Ptprcap > 3 AND Tmem119 <= 4 AND P2ry12 <= 2 AND Cd3e > 2 AND Lpcat2 <= 15 AND Ins2 <= 0 AND Aqp3 <= 3 AND Mobp <= 0 AND Dmkn <= 0 AND Klk1 <= 0 AND Krt5 <= 0 AND Siglech <= 0 AND Anxa8 <= 0 AND Tmem119 <= 0 AND Cd3e <= 251 AND Cx3cr1 <= 0 AND Tcf7 > 41 AND Krt8 <= 4 AND Cd79b <= 96 AND Ptprc > 1890 AND Coro1a <= 2323	Thymus
Rule838	Ptprcap > 3 AND Tmem119 <= 4 AND P2ry12 <= 2 AND Cd3d > 69 AND Lpcat2 > 2 AND Cd8b1 > 1465	Thymus
Rule839	Ptprcap > 3 AND Tmem119 <= 4 AND P2ry12 <= 2 AND Cela2a > 0 AND Fosl1 <= 6 AND Capns2 <= 0 AND Myb <= 11 AND Prss2 <= 0 AND C1qb <= 0 AND Try4 <= 0 AND Cldn3 <= 0 AND Hpgds <= 148 AND Krt14 > 0	Fat
Rule840	Ptprcap > 3 AND Tmem119 <= 4 AND P2ry12 <= 2 AND Cd3e > 2 AND Lpcat2 > 2 AND Cx3cr1 > 1	Spleen
Rule841	Ptprcap > 3 AND Tmem119 <= 4 AND P2ry12 <= 2 AND Cd3e <= 2 AND Cela2a > 0 AND Cd8a <= 1 AND Capns2 <= 0 AND Prss2 <= 0 AND 2210415F13Rik <= 0 AND Try4 <= 0 AND Chga <= 0 AND Tcf7 <= 10 AND Cd79b > 952	Lung
Rule842	Ptprcap > 3 AND Tmem119 <= 4 AND P2ry12 <= 2 AND Cd3e <= 2 AND Cdhr5 <= 0 AND Tm4sf4 > 0 AND Hexb <= 179 AND Cldn3 <= 0 AND C1qb <= 2 AND 2210415F13Rik <= 0	Lung
Rule843	Ptprcap > 3 AND Tmem119 <= 4 AND P2ry12 <= 2 AND Cd3d > 69 AND Lpcat2 > 28 AND Hpgds <= 37 AND C1qa <= 0 AND Rac2 > 1094 AND Csf1r <= 1	Marrow
Rule844	Ptprcap > 3 AND Tmem119 <= 4 AND P2ry12 <= 2 AND Cd3d > 69 AND Lpcat2 > 2 AND C1qa > 0 AND Ptprcap > 916	Thymus
Rule845	Ptprcap > 3 AND Tmem119 <= 4 AND P2ry12 <= 2 AND Cd3d > 69 AND Lpcat2 > 2 AND C1qa <= 0 AND Csf1r > 0 AND Ins2 <= 0	Fat
Rule846	Ptprcap > 3 AND Tmem119 <= 4 AND P2ry12 <= 2 AND Lpcat2 > 11 AND Hexb > 841 AND Lgals4 <= 25 AND C1qb <= 0	Lung
Rule847	Ptprcap > 3 AND Tmem119 <= 4 AND P2ry12 <= 2 AND Cd3d > 69 AND Lpcat2 > 2 AND C1qa <= 0 AND Csf1r <= 1 AND Coro1a <= 932 AND Ctsd <= 616	Trachea
Rule848	Ptprcap > 8 AND Tmem119 <= 4 AND Cd3e <= 2 AND Cela2a <= 0 AND Ccr9 <= 0 AND Epcam <= 23 AND Lpcat2 > 115 AND Lgmn <= 583 AND Scgn <= 0 AND Cd79b > 0 AND Ins2 <= 1 AND C1qb <= 0 AND Tspan1 <= 0 AND P2ry12 <= 0 AND Ptprcap > 57	Spleen
Rule849	Ptprcap > 8 AND Tmem119 <= 4 AND Cd3e > 2 AND Cd3e <= 223 AND Prss2 > 0 AND Chga <= 0 AND Mbp <= 0	Marrow
Rule850	Ptprcap > 8 AND Tmem119 <= 4 AND Cd3e > 2 AND Cd3e <= 223 AND Prss2 > 0 AND Chga > 0 AND Rac2 > 502	Fat
Rule851	Ptprcap > 8 AND Tmem119 <= 4 AND Cd3e > 2 AND Cd3e <= 223 AND Lpcat2 > 15 AND Krt5 <= 0 AND Coro1a > 489 AND P2ry13 <= 0 AND Cd3d <= 247 AND Krt14 <= 1 AND Lgmn <= 12 AND Lpcat2 > 41	Marrow
Rule852	Ptprcap > 8 AND Tmem119 <= 4 AND Lpcat2 > 115 AND Lgmn > 583 AND C1qa > 0	Thymus
Rule853	Ptprcap > 8 AND Lpcat2 > 115 AND Trem2 <= 532 AND Tspan8 <= 0 AND Scgn <= 0 AND Prss2 <= 0 AND Cdh17 <= 5 AND Rac2 <= 419 AND Lgals4 <= 1 AND Ins2 <= 2	Fat
Rule854	Ptprcap > 8 AND Lpcat2 > 115 AND Trem2 <= 532 AND Tspan8 <= 0 AND Rac2 <= 585 AND B4galnt2 <= 0 AND Cd79b <= 0 AND Rac2 <= 469	Trachea
Rule855	Ptprcap > 8 AND Tmem119 <= 4 AND Cd3e <= 2 AND Cela2a <= 0 AND Lpcat2 > 115 AND Tspan8 <= 0 AND Sfn <= 3 AND 2210415F13Rik <= 0 AND Krt13 <= 0 AND Cx3cr1 <= 108 AND Ccr9 <= 0 AND Epcam <= 133 AND Chga <= 0 AND Trp63 <= 0 AND Trem2 <= 0 AND Gpx2 <= 0 AND Hpgds <= 0 AND Serpinb5 <= 1 AND Perp <= 0 AND Krt14 <= 0 AND Lpcat2 <= 343	Marrow
Rule856	Ptprcap > 8 AND Tmem119 <= 4 AND Cd3e <= 2 AND Cela2a <= 0 AND Lpcat2 > 115 AND Try4 <= 0 AND Tspan8 <= 0 AND Klk1 <= 0 AND Cd3d <= 0 AND Tmem119 <= 1 AND Myb <= 72 AND Ccr9 <= 0 AND Epcam <= 284 AND Coro1a <= 2584	Fat
Rule857	Ptprcap > 8 AND Tmem119 <= 4 AND Cd3e <= 2 AND Cela2a <= 0 AND Ccr9 <= 0 AND Epcam <= 23 AND Dmbt1 <= 0 AND Cd8a <= 0 AND Prss2 <= 0 AND Ttr <= 0 AND Cd79b > 1 AND Krt13 <= 0 AND Gc <= 0 AND Anxa8 <= 0 AND Tmem119 <= 1 AND Krt15 <= 1 AND Cd79b <= 1002 AND Krt17 > 0 AND Ctsd > 1	Spleen
Rule858	Ptprcap > 8 AND Tmem119 <= 4 AND Cd3e <= 2 AND Cela2a <= 0 AND Ccr9 <= 0 AND Epcam <= 23 AND Dmbt1 <= 0 AND Cd8a <= 0 AND Prss2 <= 0 AND Cd3e <= 0 AND Ttr <= 0 AND Cd79b > 1 AND Krt13 <= 0 AND Gc <= 0 AND Anxa8 <= 0 AND Tmem119 <= 1 AND Cd79b <= 1002 AND Krt17 > 0 AND Krt15 <= 1 AND Epcam <= 0 AND Sfn > 2	Muscle
Rule859	Ptprcap > 8 AND Tmem119 <= 4 AND Cd3e <= 2 AND Cela2a <= 0 AND Ccr9 <= 0 AND Epcam <= 23 AND Dmbt1 <= 0 AND Prss2 <= 0 AND Cd8a <= 0 AND Cd3e <= 0 AND Ttr <= 0 AND Cd79b > 1 AND Krt13 <= 0 AND Gc <= 0 AND Anxa8 <= 0 AND Tmem119 <= 1 AND Cd79b <= 412 AND Dsp <= 0 AND Aqp3 <= 22 AND Guca2a <= 0 AND Mbp <= 5 AND Gpr34 <= 1 AND Calm4 <= 0 AND Cx3cr1 <= 0 AND Trem2 > 0 AND C1qc <= 0	Spleen
Rule860	Ptprcap > 8 AND Tmem119 <= 4 AND Cd3e <= 2 AND Cela2a <= 0 AND Ccr9 <= 0 AND Epcam <= 8 AND Dmbt1 <= 0 AND Cd8a <= 0 AND Cd3e <= 0 AND Ttr <= 0 AND Cd79b > 6 AND Krt13 <= 0 AND Anxa8 <= 0 AND Gc <= 0 AND Tmem119 <= 1 AND Krt15 <= 1 AND Cd79b <= 369 AND Trem2 <= 0 AND Mbp <= 5 AND Calm4 <= 0 AND Lypd3 <= 0 AND Cx3cr1 > 0 AND C1qb > 0	Fat
Rule861	Ptprcap > 8 AND Tmem119 <= 4 AND Cd3e <= 2 AND Cela2a <= 0 AND Ccr9 <= 0 AND Epcam <= 8 AND Dmbt1 <= 0 AND Cd8a <= 0 AND Cd3e <= 0 AND Ttr <= 0 AND Cd79b > 6 AND Krt13 <= 0 AND Anxa8 <= 0 AND Gc <= 0 AND Tmem119 <= 1 AND Krt15 <= 1 AND Cd79b <= 396 AND Trem2 <= 0 AND Calm4 <= 0 AND Mbp <= 5 AND Lypd3 <= 0 AND Krt17 > 0 AND Cd79b <= 252	Muscle
Rule862	Ptprcap > 8 AND Tmem119 <= 4 AND Cd3e <= 2 AND Cela2a <= 0 AND Ccr9 <= 0 AND Epcam <= 8 AND Dmbt1 <= 0 AND Cd8a <= 0 AND Cd3e <= 0 AND Ttr <= 0 AND Cd79b > 6 AND Krt13 <= 0 AND Anxa8 <= 0 AND Gc <= 0 AND Tmem119 <= 1 AND Krt15 <= 1 AND Cd79b <= 396 AND Krt17 <= 0 AND Calm4 <= 0 AND Krt5 <= 0 AND Mbp <= 5 AND Lypd3 <= 0 AND Guca2a <= 0 AND Cldn3 > 0 AND Ptprc > 128	Spleen
Rule863	Ptprcap > 8 AND Tmem119 <= 4 AND Cd3e <= 2 AND Cela2a <= 0 AND Ccr9 <= 0 AND Epcam <= 8 AND Dmbt1 <= 0 AND Cd8a <= 0 AND C1qb > 4 AND Gc <= 1 AND Tmem27 <= 0 AND Cd79b <= 128	Marrow
Rule864	Ptprcap > 8 AND Tmem119 <= 4 AND Cd3e <= 2 AND Cela2a <= 0 AND Ccr9 <= 0 AND Epcam <= 8 AND Dmbt1 <= 0 AND Cd8a <= 0 AND Cd3e <= 0 AND Ttr <= 0 AND Cd79b > 6 AND Krt13 <= 0 AND Anxa8 <= 0 AND Gc <= 0 AND Tmem119 <= 1 AND Krt15 <= 1 AND Cd79b <= 369 AND Krt17 <= 0 AND Cldn3 > 0 AND Coro1a > 281	Marrow
Rule865	Ptprcap > 8 AND Tmem119 <= 4 AND Cd3e <= 2 AND Cela2a <= 0 AND Ccr9 <= 0 AND Epcam <= 8 AND Dmbt1 <= 0 AND Cd8a <= 0 AND Cd3e <= 0 AND Ttr <= 0 AND Cd79b > 6 AND Krt13 <= 0 AND Anxa8 <= 0 AND Gc <= 0 AND Tmem119 <= 1 AND Krt15 <= 1 AND Cd79b <= 369 AND Krt17 <= 0 AND Krt5 <= 0 AND Aqp3 > 0 AND Hexb > 25	Marrow
Rule866	Ptprcap > 8 AND Tmem119 <= 4 AND Cd3e <= 2 AND Cela2a <= 0 AND Ccr9 <= 0 AND Epcam <= 8 AND Dmbt1 <= 0 AND Cd8a <= 0 AND Cd3e <= 0 AND Ttr <= 0 AND Cd79b > 6 AND Krt13 <= 0 AND Anxa8 <= 0 AND Gc <= 0 AND Cd79b <= 398 AND Krt17 > 0	Marrow
Rule867	Ptprcap > 8 AND Cela2a > 0 AND Fosl1 <= 6 AND Krt6a <= 0 AND Try4 <= 0 AND Cldn3 <= 0 AND Cd8a <= 204 AND Mbp <= 2	Fat
Rule868	Ptprcap > 8 AND Tmem119 <= 4 AND Cd3e <= 2 AND Myb > 13 AND C1qc <= 0 AND Ttr <= 0 AND Coro1a > 903 AND Ptprc > 191	Marrow
Rule869	Ptprcap > 8 AND Tmem119 <= 4 AND Cd3e <= 2 AND Myb > 13 AND Cd3d <= 74 AND Tcf7 > 47	Trachea
Rule870	Ptprcap > 8 AND Tmem119 <= 4 AND Cd3e <= 2 AND Dmbt1 <= 0 AND Ccr9 <= 0 AND Cd8a <= 0 AND Cdh1 <= 0 AND Epcam <= 8 AND Cd3e <= 0 AND Ttr <= 0 AND Cd79b > 6 AND Krt13 <= 0 AND Anxa8 <= 0 AND Gc <= 0 AND Cd79b <= 398 AND Mbp <= 5 AND Cldn3 <= 0 AND Calm4 <= 0 AND Trem2 <= 0 AND Ckmt1 <= 0 AND Guca2a <= 0 AND Krt5 > 0 AND Hexb <= 114	Marrow
Rule871	Ptprcap > 8 AND Tmem119 <= 4 AND Cd3e <= 2 AND Dmbt1 <= 0 AND Ccr9 <= 0 AND Cd8a <= 0 AND Cdh1 <= 0 AND Epcam <= 8 AND Cd3e <= 0 AND Ttr <= 0 AND Cd79b > 6 AND Krt13 <= 0 AND Anxa8 <= 0 AND Gc <= 0 AND Pnlip > 0 AND Lgals4 > 0	Thymus
Rule872	Ptprcap > 8 AND Tmem119 <= 4 AND Cd3e <= 2 AND Dmbt1 <= 0 AND Ccr9 <= 0 AND Epcam <= 8 AND Cd8a <= 0 AND Cd3e <= 0 AND Ttr <= 0 AND Cd79b > 6 AND Krt13 <= 0 AND Anxa8 <= 0 AND Gc <= 0 AND Tmem27 > 0 AND Lgmn <= 0	Kidney
Rule873	Ptprcap > 8 AND Tmem119 <= 4 AND Cd3e <= 2 AND Dmbt1 <= 0 AND Ccr9 <= 0 AND Cdh1 <= 0 AND Cd8a <= 0 AND Epcam <= 8 AND Cd3e <= 0 AND Ttr <= 0 AND Cd79b > 6 AND Krt13 <= 0 AND Anxa8 <= 0 AND Gc <= 0 AND Cd79b <= 398 AND Mbp <= 5 AND Trem2 <= 0 AND Ckmt1 <= 0 AND Krt5 <= 1 AND Cldn3 <= 0 AND Calm4 <= 0 AND Guca2a <= 0 AND Laptm5 <= 298 AND Cd79b > 173 AND Ins2 <= 0 AND Krt15 <= 0 AND Perp <= 0 AND …	Spleen
Rule874	Ptprcap > 8 AND Tmem119 <= 4 AND Cd3e <= 2 AND Dmbt1 <= 0 AND Ccr9 <= 0 AND Cd8a <= 0 AND Cdh1 <= 0 AND Epcam <= 8 AND Cd3e <= 0 AND Ttr <= 0 AND Cd79b > 6 AND Krt13 <= 0 AND Anxa8 <= 0 AND Gc <= 0 AND Cd79b <= 398 AND Mbp <= 5 AND Trem2 <= 0 AND Ckmt1 <= 0 AND Krt5 <= 1 AND Cldn3 <= 0 AND Calm4 <= 0 AND Hpgds > 1 AND Ptprcap <= 72	Muscle
Rule875	Ptprcap > 8 AND Tmem119 <= 4 AND Cd3e <= 2 AND Dmbt1 <= 0 AND Ccr9 <= 0 AND Cd8a <= 0 AND Cdh1 <= 0 AND Epcam <= 8 AND Cd3e <= 0 AND Ttr <= 0 AND Gc <= 0 AND Cd79b > 6 AND Ins2 > 14 AND Csf1r <= 0 AND Ptprcap > 317	Marrow
Rule876	Ptprcap > 8 AND Tmem119 <= 4 AND Cd3e <= 2 AND Dmbt1 <= 0 AND Ccr9 <= 0 AND Cd8a <= 0 AND Cdh1 <= 0 AND Epcam <= 8 AND Cd3e <= 0 AND Ttr <= 0 AND Gc <= 0 AND Cd79b > 6 AND Krt13 <= 0 AND Anxa8 <= 0 AND Cd79b <= 398 AND Mbp <= 5 AND Hpgds <= 8 AND Trem2 <= 0 AND Ckmt1 <= 0 AND Krt5 <= 1 AND Cldn3 <= 0 AND Calm4 <= 0 AND Sfn > 47 AND Mbp <= 0	Fat
Rule877	Ptprcap > 8 AND Tmem119 <= 4 AND Cd3e <= 2 AND Dmbt1 <= 0 AND Ccr9 <= 0 AND Cd8a <= 0 AND Cdh1 <= 0 AND Epcam <= 8 AND Cd3e <= 0 AND Ttr <= 0 AND Cd79b > 6 AND Krt13 <= 0 AND Anxa8 <= 0 AND Gc <= 0 AND Cd79b <= 398 AND Mbp <= 5 AND Hpgds <= 8 AND Trem2 <= 0 AND Ckmt1 <= 0 AND Krt5 <= 1 AND Cldn3 <= 0 AND Calm4 <= 0 AND C1qb <= 1 AND Cdhr5 <= 0 AND Cd3g > 1	Spleen
Rule878	Ptprcap > 8 AND Tmem119 <= 4 AND Cd3e <= 2 AND Dmbt1 <= 0 AND Ccr9 <= 0 AND Cd8a > 6 AND P2ry13 <= 0 AND Krt15 <= 0 AND Rac2 > 333	Spleen
Rule879	Ptprcap > 8 AND Tmem119 <= 4 AND Cd3e <= 2 AND Cd8a <= 0 AND Dmbt1 <= 0 AND Ccr9 <= 0 AND Cdh1 <= 0 AND Epcam <= 8 AND Cd3e <= 0 AND Ttr <= 0 AND Cd79b > 6 AND Krt13 <= 0 AND Anxa8 <= 0 AND Gc <= 0 AND Cd79b <= 398 AND Mbp <= 5 AND Hpgds <= 8 AND Trem2 <= 0 AND Ckmt1 <= 0 AND Krt5 <= 1 AND Cldn3 <= 0 AND Calm4 <= 0 AND C1qb > 1	Spleen
Rule880	Ptprcap > 8 AND Tmem119 <= 4 AND Cd3e <= 2 AND Cd8a <= 0 AND Dmbt1 <= 0 AND Ccr9 <= 0 AND Cdh1 <= 0 AND Epcam <= 8 AND Cd3e <= 0 AND Ttr <= 0 AND Cd79b > 6 AND Krt13 <= 0 AND Anxa8 <= 0 AND Gc <= 0 AND Cd79b <= 398 AND Mbp <= 5 AND Hpgds <= 8 AND Trem2 <= 0 AND Ckmt1 <= 0 AND Krt5 <= 1 AND Cldn3 <= 0 AND Calm4 <= 0 AND Cdhr5 <= 0 AND Fcrls > 0 AND Rac2 <= 110	Spleen
Rule881	Ptprcap > 8 AND Tmem119 <= 4 AND Cd3e > 2 AND Cd3e <= 223 AND Abcc8 > 0 AND Dmkn <= 1 AND Rac2 <= 1564	Marrow
Rule882	Ptprcap > 8 AND Tmem119 <= 4 AND Cd3e > 2 AND Ins2 <= 0 AND Perp <= 45 AND Tmem45b > 0 AND Krt14 <= 0 AND Ptprcap > 174	Marrow
Rule883	Ptprcap > 8 AND Tmem119 <= 4 AND Cd3e > 2 AND Cd3e <= 223 AND Ins2 <= 0 AND Perp > 59 AND Hexb <= 1	Lung
Rule884	Ptprcap > 8 AND Tmem119 <= 4 AND Cd3e > 2 AND Ins2 <= 0 AND Mobp <= 0 AND Aqp3 <= 3 AND Dmkn <= 0 AND Anxa8 > 0 AND Ptprcap > 386 AND Lgals7 <= 0	Fat
Rule885	Ptprcap > 8 AND Tmem119 <= 4 AND Cd3e > 2 AND Ins2 <= 0 AND Mobp <= 0 AND Aqp3 <= 3 AND Dmkn <= 0 AND Klk1 <= 0 AND Krt5 <= 0 AND Siglech <= 0 AND Tmem119 <= 0 AND C1qa > 1 AND C1qa <= 20	Fat
Rule886	Ptprcap > 8 AND Tmem119 <= 4 AND Cd3e > 2 AND Ins2 <= 0 AND Mobp <= 0 AND Aqp3 <= 3 AND Dmkn <= 0 AND Klk1 <= 0 AND Krt5 <= 0 AND Siglech <= 0 AND Tmem119 <= 0 AND Cd3e <= 251 AND Cx3cr1 <= 0 AND Aqp3 <= 0 AND Gpr34 <= 49 AND Cdh1 <= 0 AND Tcf7 > 41 AND Sfn <= 0 AND Krt8 <= 4 AND Chga <= 0 AND Coro1a <= 7540 AND Cd79b <= 101 AND Cldn3 <= 0 AND Ctsd > 4 AND Cldn7 <= 0 AND Cd3g > 324 AND Lpcat2 <= …	Thymus
Rule887	Ptprcap > 8 AND Tmem119 <= 4 AND Cd3e > 2 AND Ins2 <= 0 AND Mobp <= 0 AND Aqp3 <= 3 AND Dmkn <= 0 AND Klk1 <= 0 AND Krt5 <= 0 AND Siglech <= 0 AND Tmem119 <= 0 AND Cd3e <= 251 AND Gpr34 <= 86 AND Cx3cr1 <= 0 AND Aqp3 <= 0 AND Cdh1 <= 0 AND Tcf7 > 41 AND Sfn <= 0 AND Krt8 <= 4 AND Coro1a <= 7540 AND Cd79b <= 101 AND Chga <= 0 AND Cldn3 <= 0 AND Ccr9 > 209 AND Lgals4 <= 16 AND Lgals7 <= 0 AND Coro1…	Thymus
Rule888	Ptprcap > 8 AND Tmem119 <= 4 AND Cd3e > 2 AND Ins2 <= 0 AND Mobp <= 0 AND Dmkn <= 0 AND Aqp3 <= 3 AND Klk1 <= 0 AND Krt5 <= 0 AND Siglech <= 0 AND Tmem119 <= 0 AND Cd3e <= 251 AND Gpr34 <= 86 AND Tcf7 > 41 AND Tmem45b <= 0 AND Csf1r <= 1 AND Coro1a <= 7497 AND Sfn <= 0 AND Krt8 <= 4 AND Cd79b <= 99 AND Coro1a > 66 AND Cx3cr1 <= 0 AND Cldn3 <= 0 AND Chga <= 0 AND Ctsd > 3 AND Cldn7 <= 0 AND P2ry12…	Spleen
Rule889	Ptprcap > 8 AND Tmem119 <= 4 AND Cd3e <= 2 AND Cd8a <= 0 AND Dmbt1 <= 0 AND Ccr9 <= 0 AND Cdh1 <= 0 AND Epcam <= 8 AND Cd3e <= 0 AND Ttr <= 0 AND Gc <= 0 AND Cd79b > 6 AND Krt13 <= 0 AND Anxa8 <= 0 AND Cd79b <= 398 AND Fcrls <= 0 AND Mbp <= 5 AND Hpgds <= 8 AND Krt5 <= 1 AND Cldn3 <= 0 AND Lgmn <= 196 AND Lgals4 <= 0 AND Perp > 0 AND Ctsd <= 0	Muscle
Rule890	Ptprcap > 8 AND Tmem119 <= 4 AND Cd3e <= 2 AND Cd8a <= 0 AND Dmbt1 <= 0 AND Ccr9 <= 0 AND Cdh1 <= 0 AND Epcam <= 8 AND Cd3e <= 0 AND Clca2 > 0 AND Mobp <= 4 AND Fcrls <= 0 AND Ctsd <= 683	Spleen
Rule891	Ptprcap > 8 AND Tmem119 <= 4 AND Cd3e <= 2 AND Cd8a <= 0 AND Dmbt1 <= 0 AND Ccr9 <= 0 AND Cdh1 > 0 AND Krt15 <= 0 AND C1qa <= 0 AND P2ry13 <= 0 AND Lpcat2 <= 0 AND Ptprcap <= 249	Lung
Rule892	Ptprcap > 8 AND Tmem119 <= 4 AND Cd3e <= 2 AND Cd8a <= 0 AND Dmbt1 <= 0 AND Ccr9 <= 0 AND Epcam <= 8 AND Cd3e <= 0 AND Ttr <= 0 AND Cd79b > 6 AND Krt13 <= 0 AND Anxa8 <= 0 AND Gc <= 0 AND Cd79b <= 369 AND Fcrls <= 0 AND Mbp <= 5 AND Hpgds <= 8 AND Cldn3 <= 0 AND Lgmn <= 196 AND Lgals4 <= 0 AND Ins2 > 1 AND Coro1a > 159 AND Laptm5 <= 99	Spleen
Rule893	Ptprcap > 8 AND Tmem119 <= 4 AND Cd3e <= 2 AND Cd8a <= 0 AND Dmbt1 <= 0 AND Ccr9 <= 0 AND Epcam <= 8 AND Cd3e <= 0 AND Ttr <= 0 AND Cd79b > 6 AND Krt13 <= 0 AND Anxa8 > 0 AND Epcam <= 0 AND Lpcat2 <= 0 AND Dsc3 <= 0 AND Pigr <= 4	Fat
Rule894	Ptprcap > 8 AND Tmem119 <= 4 AND Cd3e <= 2 AND Cd8a <= 0 AND Dmbt1 <= 0 AND Ccr9 <= 0 AND Epcam <= 8 AND Cd3e <= 0 AND Ttr <= 0 AND Cd79b > 6 AND Krt13 <= 0 AND Gc <= 0 AND Anxa8 > 0 AND Epcam <= 0	Muscle
Rule895	Ptprcap > 8 AND Tmem119 <= 4 AND Cd3e <= 2 AND Cd8a <= 0 AND Dmbt1 <= 0 AND Ccr9 <= 0 AND Epcam <= 8 AND Cd3e <= 0 AND Ttr <= 0 AND Cd79b > 6 AND Krt13 <= 0 AND Gc <= 0 AND Cd79b > 369 AND Krt5 <= 0 AND Cdhr5 <= 0 AND Krt14 > 0 AND Pigr <= 81 AND Gpr34 > 0 AND P2ry12 <= 0	Spleen
Rule896	Ptprcap > 8 AND Tmem119 <= 4 AND Cd3e <= 2 AND Cd8a <= 0 AND Dmbt1 <= 0 AND Ccr9 <= 0 AND Epcam <= 8 AND Cd3e <= 0 AND Ttr <= 0 AND Cd79b > 6 AND Krt13 <= 0 AND Gc <= 0 AND Cd79b > 369 AND Krt5 <= 0 AND Cdhr5 <= 0 AND Krt14 > 0 AND Gpr34 <= 0 AND Pigr <= 81 AND P2ry13 > 0 AND Hexb <= 1	Thymus
Rule897	Ptprcap > 8 AND Tmem119 <= 4 AND Cd3e <= 2 AND Cd8a <= 0 AND Dmbt1 <= 0 AND Ccr9 <= 0 AND Epcam <= 8 AND Cd3e <= 0 AND Ttr <= 0 AND Krt13 <= 0 AND Rac2 > 7769 AND Lgmn <= 13	Lung
Rule898	Ptprcap > 8 AND Tmem119 <= 4 AND Cd3e <= 1 AND Cd8a <= 0 AND Prss2 <= 0 AND Dmbt1 <= 0 AND Ccr9 <= 0 AND Epcam <= 23 AND Krt13 <= 0 AND Cd3e <= 0 AND Ttr <= 0 AND Oit1 > 0 AND Aqp3 <= 0 AND Trem2 <= 0	Spleen
Rule899	Ptprcap > 8 AND Tmem119 <= 4 AND Cd3e <= 1 AND Cd8a <= 0 AND Prss2 <= 0 AND Dmbt1 <= 0 AND Ccr9 <= 0 AND Epcam <= 8 AND Krt13 <= 0 AND Cd3e <= 0 AND Ttr <= 0 AND Cd3d <= 5 AND Guca2a <= 0 AND Gc <= 0 AND Fcrls <= 1 AND Krt5 <= 0 AND Cd3g > 2 AND Cdh17 <= 0 AND Cd3d <= 1 AND Tmem119 <= 0 AND Laptm5 <= 384	Spleen
Rule900	Ptprcap > 8 AND Tmem119 <= 4 AND Cd3e <= 1 AND Cd8a <= 0 AND Dmbt1 <= 0 AND Epcam <= 8 AND Krt13 <= 0 AND Cd3e <= 0 AND Cd3g <= 1 AND Ttr <= 0 AND Gc <= 0 AND Krt5 <= 0 AND Prss2 <= 0 AND Guca2a <= 0 AND Trem2 <= 0 AND Fcrls <= 0 AND Cx3cr1 > 8 AND Ins2 <= 1 AND C1qb <= 0 AND C1qa <= 0	Spleen
Rule901	Ptprcap > 8 AND Tmem119 <= 4 AND Cd3e <= 1 AND Cd8a <= 0 AND Dmbt1 <= 0 AND Epcam <= 8 AND Krt13 <= 0 AND Cd3e <= 0 AND Cd3g <= 1 AND Ttr <= 0 AND Gc <= 0 AND Krt5 <= 0 AND Prss2 <= 0 AND Guca2a <= 0 AND Trem2 <= 0 AND Fcrls <= 0 AND Cx3cr1 > 8 AND Ins2 <= 1 AND Tcf7 <= 20	Fat
Rule902	Ptprcap > 8 AND Tmem119 <= 4 AND Cd3e <= 1 AND Cd8a <= 0 AND Dmbt1 <= 0 AND Epcam <= 8 AND Krt13 <= 0 AND Cx3cr1 > 6 AND Krt5 <= 0 AND Ins2 > 1	Lung
Rule903	Ptprcap > 8 AND Tmem119 <= 4 AND Cd3e <= 1 AND Cd8a <= 0 AND Dmbt1 <= 0 AND Epcam <= 8 AND Krt13 <= 0 AND Cd3e <= 0 AND Guca2a <= 0 AND Cd3g <= 1 AND Trem2 <= 0 AND Ttr <= 0 AND Gc <= 0 AND Krt5 <= 0 AND Fcrls <= 0 AND Prss2 <= 0 AND Ctsd > 1991 AND P2ry13 <= 0 AND Lgals4 <= 0 AND Chga <= 0 AND Krt15 <= 0 AND Csf1r <= 584 AND Pigr <= 0 AND C1qb <= 0 AND Ptprc <= 1917 AND Coro1a > 618	Spleen
Rule904	Ptprcap > 8 AND Tmem119 <= 4 AND Cd3e <= 1 AND Cd8a <= 0 AND Dmbt1 <= 0 AND Epcam <= 8 AND Krt13 <= 0 AND Cd3e <= 0 AND Cd79b > 11 AND Gc <= 0 AND Cd79b > 369 AND Ccr9 > 0 AND Krt14 > 0 AND Dmkn <= 0	Fat
Rule905	Ptprcap > 8 AND Tmem119 <= 4 AND Cd3e <= 1 AND Cd8a <= 0 AND Dmbt1 <= 0 AND Epcam <= 8 AND Krt13 <= 0 AND Cd3e <= 0 AND Cd79b > 11 AND Gc <= 0 AND Cd79b > 369 AND Cdhr5 > 0 AND Tmem119 <= 0	Spleen
Rule906	Ptprcap > 8 AND Tmem119 <= 4 AND Cd3e <= 1 AND Cd8a <= 0 AND Dmbt1 <= 0 AND Epcam <= 8 AND Krt13 <= 0 AND Cd3e <= 0 AND Cd79b > 11 AND Gc <= 0 AND Cd79b > 369 AND Krt5 <= 0 AND Ttr <= 0 AND Csf1r <= 1 AND Tcf7 > 0 AND Hexb <= 0	Marrow
Rule907	Ptprcap > 8 AND Tmem119 <= 4 AND Cd3e <= 1 AND Cd8a <= 0 AND Dmbt1 <= 0 AND Epcam <= 8 AND Krt13 <= 0 AND Cd3e <= 0 AND Cd79b > 11 AND Gc <= 0 AND Cd79b > 369 AND Krt5 <= 0 AND Ttr <= 0 AND Csf1r <= 1 AND Tcf7 > 0 AND Lgmn <= 1	Spleen
Rule908	Ptprcap > 8 AND Tmem119 <= 4 AND Cd3e <= 1 AND Cd8a <= 0 AND Dmbt1 <= 0 AND Epcam <= 8 AND Krt13 <= 0 AND Cd3e <= 0 AND Cd3g <= 1 AND Ttr <= 0 AND Gc <= 0 AND Cd79b > 11 AND Cd79b > 369 AND Krt5 <= 0 AND Csf1r <= 1 AND C1qb <= 0 AND Fcrls <= 0 AND Cx3cr1 <= 0 AND C1qa > 0 AND Perp <= 1	Spleen
Rule909	Ptprcap > 8 AND Tmem119 <= 4 AND Cd3e <= 1 AND Cd8a <= 0 AND Dmbt1 <= 0 AND Epcam <= 8 AND Krt13 <= 0 AND Cd3e <= 0 AND Cd3g <= 1 AND Trem2 <= 0 AND Ttr <= 0 AND Gc <= 0 AND Ctsd <= 581 AND Try4 > 0 AND Cela2a <= 0	Muscle
Rule910	Ptprcap > 8 AND Tmem119 <= 4 AND Cd3e <= 1 AND Cd8a <= 0 AND Dmbt1 <= 0 AND Epcam <= 8 AND Krt13 <= 0 AND Cd3e <= 0 AND Cd3g <= 1 AND Trem2 <= 0 AND Ttr <= 0 AND Gc <= 0 AND Ctsd <= 581 AND Tcf7 <= 0 AND Cd79b > 409 AND Krt5 <= 0 AND C1qb <= 0 AND Fcrls <= 0 AND Ctsd > 441 AND Cd79b > 821 AND Hexb <= 0	Muscle
Rule911	Ptprcap > 8 AND Tmem119 <= 4 AND Cd3e <= 1 AND Cd8a <= 0 AND Dmbt1 <= 0 AND Epcam <= 8 AND Krt13 <= 0 AND Cd3e <= 0 AND Cd3g <= 1 AND Trem2 <= 0 AND Ttr <= 0 AND Gc <= 0 AND Ctsd <= 375 AND Cd79b > 409 AND Krt5 <= 0 AND C1qb <= 0 AND Fcrls <= 0 AND C1qa <= 0 AND Trim29 <= 0 AND Gpr34 <= 0 AND C1qc <= 0 AND Cx3cr1 <= 0 AND Rac2 > 145 AND Ins2 <= 2 AND Calml3 <= 0 AND Krt6a <= 0 AND Ins2 <= 0 AND T…	Marrow
Rule912	Ptprcap > 8 AND Tmem119 <= 4 AND Cd3e <= 1 AND Cd8a <= 0 AND Dmbt1 <= 0 AND Epcam <= 8 AND Krt13 <= 0 AND Cd3e <= 0 AND Cd3g <= 1 AND Trem2 <= 0 AND Ttr <= 0 AND Gc <= 0 AND Ctsd <= 375 AND Cd79b > 409 AND Krt5 <= 0 AND C1qb <= 0 AND Fcrls <= 0 AND C1qa <= 0 AND Trim29 <= 0 AND Gpr34 <= 0 AND C1qc <= 0 AND Cx3cr1 <= 0 AND Rac2 > 145 AND Ins2 <= 2 AND Calml3 <= 0 AND Krt6a <= 0 AND Perp > 0 AND Ep…	Spleen
Rule913	Ptprcap > 8 AND Tmem119 <= 4 AND Cd3e <= 2 AND Cd8a <= 0 AND Ccr9 <= 0 AND Dmbt1 <= 0 AND Epcam <= 8 AND Krt13 <= 0 AND Cd3e <= 0 AND Cd79b > 11 AND Gc <= 0 AND Cd79b > 369 AND Krt5 <= 0 AND Rac2 > 0 AND Trem2 > 0 AND Rac2 <= 2269	Marrow
Rule914	Ptprcap > 8 AND Tmem119 <= 4 AND Cd3e <= 2 AND Cd8a <= 0 AND Ccr9 <= 0 AND Dmbt1 <= 0 AND Epcam <= 8 AND Krt13 <= 0 AND Cd3e <= 0 AND Trem2 <= 0 AND Cd3g <= 0 AND Cx3cr1 > 2 AND Sfn <= 1 AND Chga <= 1 AND P2ry12 <= 0 AND Lgmn <= 40 AND Lgmn <= 1	Liver
Rule915	Ptprcap > 8 AND Tmem119 <= 4 AND Cd3e <= 2 AND Cd8a <= 0 AND Ccr9 <= 0 AND Dmbt1 <= 0 AND Epcam <= 8 AND Krt13 <= 0 AND Cd3e <= 0 AND Trem2 <= 0 AND Guca2a <= 0 AND Cd3d <= 5 AND Cd3g <= 3 AND Ttr <= 0 AND Gc <= 0 AND Krt5 <= 0 AND Cd79b > 369 AND C1qb <= 0 AND Fcrls <= 0 AND C1qa <= 0 AND Krt15 <= 1 AND Krt8 > 3 AND Epcam <= 0	Heart
Rule916	Ptprcap > 8 AND Tmem119 <= 4 AND Cd3e <= 2 AND Cd8a <= 0 AND Ccr9 <= 0 AND Dmbt1 <= 0 AND Epcam <= 8 AND Krt13 <= 0 AND Cd3e <= 0 AND Trem2 <= 0 AND Cd3g <= 0 AND Ttr <= 0 AND Gc <= 0 AND Ctsd > 375 AND Lpcat2 > 130 AND Ptprcap <= 557	Marrow
Rule917	Ptprcap > 8 AND Tmem119 <= 4 AND Cd3e <= 2 AND Cd8a <= 0 AND Ccr9 <= 0 AND Dmbt1 <= 0 AND Epcam <= 8 AND Krt13 <= 0 AND Cd3e <= 0 AND Trem2 <= 0 AND Guca2a <= 0 AND Cd3d <= 5 AND Cd3g <= 3 AND Ttr <= 0 AND Gc <= 0 AND Krt5 <= 0 AND Cd79b > 369 AND C1qb <= 0 AND Fcrls <= 0 AND C1qa <= 0 AND Krt15 <= 1 AND Gpr34 > 0 AND P2ry12 > 0	Fat
Rule918	Ptprcap > 8 AND Tmem119 <= 4 AND Cd3e <= 2 AND Cd8a <= 0 AND Ccr9 <= 0 AND Dmbt1 <= 0 AND Epcam <= 8 AND Krt13 <= 0 AND Cd3e <= 0 AND Trem2 <= 0 AND Guca2a <= 0 AND Cd3d <= 5 AND Cd3g <= 3 AND Ttr <= 0 AND Gc <= 0 AND Krt5 <= 0 AND Cd79b > 369 AND C1qb <= 0 AND Fcrls <= 0 AND C1qa <= 0 AND Krt15 <= 1 AND C1qc <= 0 AND Cx3cr1 <= 0 AND Ins2 <= 0 AND Tmem119 <= 0 AND Rac2 > 145 AND Perp <= 0 AND Tsp…	Marrow
Rule919	Ptprcap > 8 AND Tmem119 <= 4 AND Cd3e <= 2 AND Cd8a <= 0 AND Ccr9 <= 0 AND Dmbt1 <= 0 AND Epcam <= 8 AND Krt13 <= 0 AND Cd3e <= 0 AND Trem2 <= 0 AND Guca2a <= 0 AND Cd3d <= 5 AND Cd3g <= 3 AND Ttr <= 0 AND Gc <= 0 AND Krt5 <= 0 AND Cd79b > 369 AND C1qb <= 0 AND Fcrls <= 0 AND C1qa <= 0 AND Krt15 <= 1 AND C1qc <= 0 AND Cx3cr1 <= 0 AND Ins2 <= 0 AND Tmem119 <= 0 AND Rac2 > 145 AND Perp <= 0 AND Tsp…	Spleen
Rule920	Gpx2 > 4 AND Krt6a <= 39 AND Cdx1 > 0 AND Chodl <= 14 AND Ptprc <= 71 AND Calml3 <= 26 AND Ptprcap <= 4 AND Ctrb1 <= 0 AND Trp63 <= 2 AND Lypd3 <= 2 AND Mobp <= 18	Colon
Rule921	Ptprcap > 8 AND Tmem119 <= 4 AND Cd3e <= 2 AND Cd8a <= 0 AND Ccr9 <= 0 AND Dmbt1 <= 0 AND Epcam <= 8 AND Aqp3 > 13 AND Chga <= 1	Spleen
Rule922	Ttr > 4 AND Chga <= 2 AND Epcam <= 4 AND Try4 <= 0 AND Resp18 <= 1 AND Laptm5 <= 2073 AND Pcsk1n <= 5 AND Guca2a <= 0 AND Asb5 <= 1 AND Tmem27 <= 1 AND Tspan1 <= 0 AND Tfap2b <= 0 AND Krt19 <= 0 AND Clca2 <= 0 AND Dmkn <= 0 AND Ctsd > 3	Liver
Rule923	Ptprcap > 8 AND Tmem119 <= 4 AND Cd3e <= 2 AND Prss2 > 0 AND Gpr34 <= 0 AND Perp <= 0 AND Tmem119 <= 0 AND Cd79b <= 749	Fat
Rule924	Chodl > 2 AND Scel <= 0 AND Tmem119 <= 14 AND Foxf1a <= 36 AND Lpcat2 <= 15 AND Dmbt1 <= 2 AND Cdh17 <= 0 AND Ccr9 <= 4 AND Pkp1 <= 4 AND Dsp <= 8 AND Phgr1 <= 0 AND Cldn3 <= 7 AND Fxyd3 <= 2 AND Oit1 <= 0 AND Epcam <= 1 AND Pitx1 > 0 AND Krt14 > 0	Muscle
Rule925	Ptprcap > 8 AND Tmem119 <= 4 AND Cd3e <= 2 AND Prss2 > 0 AND Resp18 <= 0 AND Coro1a > 511 AND Krt15 > 0	Lung
Rule926	Ptprcap > 8 AND Tmem119 <= 4 AND Cd3e <= 2 AND Cd8a <= 0 AND Ccr9 <= 0 AND Dmbt1 <= 0 AND Epcam <= 8 AND Krt13 <= 0 AND Cd3e <= 0 AND Trem2 <= 0 AND Cd3g <= 0 AND Ttr <= 0 AND Gc <= 0 AND Ctsd <= 199 AND Cd79b > 412 AND Krt5 <= 0 AND C1qb <= 0 AND Calml3 > 0	Spleen
Rule927	Chodl > 2 AND Scel <= 0 AND Pitx1 > 24 AND Krt14 <= 1	Bladder
Rule928	Chodl > 2 AND Scel <= 0 AND Foxf1a <= 1 AND Tmem119 <= 129 AND Lpcat2 <= 15 AND Dmbt1 <= 2 AND Cdh17 <= 0 AND Ccr9 <= 4 AND Dsp <= 1 AND Perp <= 28 AND Phgr1 <= 0 AND Pkp1 <= 0 AND Ctsd <= 1605 AND Dmbt1 <= 0 AND 2210415F13Rik <= 0 AND Tspan8 <= 0 AND Epcam <= 1 AND Pigr <= 0 AND Klk1 <= 1 AND Resp18 <= 0 AND Dsc3 <= 0 AND S100a14 <= 0 AND Tmem119 <= 57 AND Dmkn <= 0 AND C1qb > 0	Muscle
Rule929	Ptprcap > 8 AND Tmem119 <= 4 AND Cd3e <= 2 AND Perp > 2 AND Tcf7 <= 5 AND Lgals4 <= 5 AND Ctsd <= 2	Marrow
Rule930	Ptprcap > 8 AND Tmem119 <= 4 AND Cd3e <= 2 AND Cd8a <= 0 AND Ccr9 <= 0 AND Dmbt1 <= 0 AND Epcam <= 8 AND Krt13 <= 0 AND Cd3e <= 0 AND Trem2 <= 0 AND Cd3g <= 0 AND Ttr <= 0 AND Gc <= 0 AND Ctsd <= 199 AND Cd79b > 412 AND C1qb <= 0 AND Aqp3 <= 0 AND Fcrls <= 0 AND Krt5 > 0 AND Cldn3 <= 0 AND Perp <= 0 AND Ctsd <= 1	Marrow
Rule931	Ptprcap > 3 AND Tmem119 <= 4 AND P2ry12 > 2 AND Cdx1 <= 0 AND Ptprcap > 11 AND P2ry13 <= 0 AND Oit1 <= 0 AND Krt15 <= 0 AND Sfn <= 0 AND Siglech <= 1 AND Ptprc > 474	Spleen
Rule932	Ptprcap > 3 AND P2ry12 <= 2 AND Tmem119 > 4 AND Sfn <= 0 AND Fosl1 <= 3 AND Ptprc <= 69 AND Cd79b <= 14	Lung
Rule933	Ptprcap > 3 AND P2ry12 <= 2 AND Tmem119 > 5 AND Myb <= 4 AND Fosl1 <= 3 AND Ttr <= 0 AND Cd79b <= 93 AND Cldn3 <= 0	Kidney
Rule934	Ptprcap > 3 AND Tmem119 <= 3 AND P2ry12 > 2 AND Cdx1 <= 0 AND P2ry12 <= 14 AND Lgmn <= 1 AND C1qa <= 1	Thymus
Rule935	Ptprcap > 3 AND P2ry12 <= 2 AND Tmem119 > 3 AND Cd8b1 <= 340 AND Fosl1 <= 3 AND C1qc > 0	Heart
Rule936	Ptprcap > 3 AND P2ry12 <= 2 AND Cd3e > 2 AND Krt19 > 1 AND C1qc <= 0 AND Krt5 <= 0	Spleen
Rule937	Ptprcap > 3 AND P2ry12 <= 2 AND Cd3e > 2 AND Rac2 > 5833 AND Ins2 <= 79 AND Krt8 <= 0 AND Krt15 <= 0 AND Chga <= 0 AND Aqp3 <= 0 AND Gpr34 <= 0	Spleen
Rule938	Ptprcap > 3 AND P2ry12 <= 2 AND Cd3e > 2 AND Rac2 > 5833 AND Ins2 > 79	Pancreas
Rule939	Ptprcap > 3 AND P2ry12 <= 2 AND Cd3e > 2 AND Ins2 <= 0 AND Pkp1 > 0 AND Krt5 > 0	Fat
Rule940	Ptprcap > 3 AND P2ry12 <= 2 AND Cd3e > 2 AND Ins2 <= 0 AND Aqp3 > 3 AND Mbp <= 181 AND Cd3g <= 1008 AND Ptprc > 233 AND Krt14 <= 0	Marrow
Rule941	Ptprcap > 3 AND P2ry12 <= 2 AND Cd3e > 2 AND Ins2 <= 0 AND Aqp3 > 3 AND Mbp <= 140 AND Cd3g <= 1008 AND Coro1a > 221	Fat
Rule942	Ptprcap > 3 AND P2ry12 <= 2 AND Cd3e > 2 AND Ins2 <= 0 AND Aqp3 > 16 AND Krt14 <= 0	Lung
Rule943	Ptprcap > 3 AND P2ry12 <= 2 AND Cd3e > 2 AND Ins2 <= 0 AND Mobp <= 0 AND Dmkn <= 0 AND Klk1 <= 0 AND Tmem119 <= 0 AND Cd3e > 251 AND Sfn <= 0 AND Krt14 <= 0 AND Ctsd <= 607 AND Tcf7 > 258	Thymus
Rule944	Ptprcap > 3 AND P2ry12 <= 2 AND Ccr9 > 0 AND Serpinb5 <= 0 AND Fam25c <= 0 AND Pitx2 <= 11 AND Lgals7 > 0 AND Krt14 <= 0 AND Chga <= 0 AND Mbp <= 0	Spleen
Rule945	Ptprcap > 3 AND P2ry12 <= 2 AND Ccr9 > 0 AND Serpinb5 <= 0 AND Fam25c <= 0 AND Pitx2 <= 11 AND Lgals7 > 0 AND Krt14 <= 0 AND Chga <= 0	Thymus
Rule946	Ptprcap > 3 AND P2ry12 <= 2 AND Ccr9 > 0 AND Lgals7 > 0 AND Krt14 <= 0	Trachea
Rule947	Ptprcap > 3 AND P2ry12 <= 2 AND Ccr9 > 0 AND Serpinb5 <= 0 AND Fam25c <= 0 AND Pitx2 <= 11 AND Lgals7 <= 0 AND Phgr1 <= 0 AND Siglech <= 31 AND Ptprcap <= 9 AND Ccr9 > 34	Thymus
Rule948	Ptprcap > 8 AND Tmem119 <= 2 AND Cd3e <= 2 AND Cd8a <= 0 AND Dmbt1 <= 0 AND Ccr9 <= 0 AND Epcam <= 8 AND Krt15 <= 2 AND Cd3e <= 0 AND Trem2 <= 0 AND Cd3g <= 2 AND Ttr <= 0 AND Gc <= 0 AND Krt5 <= 0 AND Guca2a <= 0 AND Ctsd > 283 AND Clca2 <= 0 AND Perp <= 16 AND Csf1r <= 7 AND Krt14 > 1	Fat
Rule949	Ptprcap > 8 AND Tmem119 <= 2 AND Cd3e <= 2 AND Cd8a <= 0 AND Dmbt1 <= 0 AND Ccr9 <= 0 AND Epcam <= 8 AND Krt15 <= 2 AND Cd3e <= 0 AND Trem2 <= 0 AND Cd3g <= 2 AND Ttr <= 0 AND Gc <= 0 AND Krt5 <= 0 AND Guca2a <= 0 AND Ctsd > 283 AND Clca2 <= 0 AND Perp <= 16 AND P2ry13 > 0 AND Gpr34 <= 0	Kidney
Rule950	Ptprcap > 8 AND Tmem119 <= 2 AND Cd3e <= 2 AND Cd8a <= 0 AND Dmbt1 <= 0 AND Ccr9 <= 0 AND Epcam <= 8 AND Krt15 <= 2 AND Cd3e <= 0 AND Trem2 <= 0 AND Cd3g <= 2 AND Ttr <= 0 AND Gc <= 0 AND Krt5 <= 0 AND Guca2a <= 0 AND Ctsd > 283 AND Clca2 <= 0 AND Perp <= 16 AND Gpr34 <= 70 AND Csf1r <= 280 AND Crybb1 <= 2 AND Ptprcap > 1900 AND Cd79b <= 1083	Lung
Rule951	Ptprcap > 8 AND Tmem119 <= 2 AND Ccr9 > 0 AND Serpinb5 <= 0 AND Fam25c <= 0 AND Pitx2 <= 11 AND Lgals7 <= 0 AND Phgr1 <= 0 AND Trim29 > 0	Heart
Rule952	Ptprcap > 8 AND P2ry12 <= 3 AND Ccr9 > 0 AND Serpinb5 <= 0 AND Fam25c <= 0 AND Pitx2 <= 11 AND Lgals7 <= 0 AND Phgr1 <= 0 AND Dmkn > 0	Thymus
Rule953	Ptprcap > 8 AND P2ry12 <= 3 AND Ccr9 > 0 AND Serpinb5 <= 0 AND Fam25c <= 0 AND Pitx2 <= 11 AND Lgals7 <= 0 AND Phgr1 <= 0 AND Krt6a > 0 AND Fcrls <= 0	Thymus
Rule954	Ptprcap > 8 AND P2ry12 <= 3 AND Cd3e <= 2 AND Fosl1 > 0 AND Fcrls <= 0 AND Klk1 <= 0 AND Lpcat2 <= 0 AND Ptprc <= 2	Mammary
Rule955	Ptprcap > 8 AND P2ry12 <= 3 AND Cd3e <= 2 AND Cd8a <= 0 AND Dmbt1 <= 0 AND Ccr9 > 0 AND Serpinb5 <= 0 AND C1qb <= 1 AND Siglech <= 29 AND Coro1a > 138 AND Lpcat2 <= 19 AND Mbp <= 3	Lung
Rule956	Ptprcap > 8 AND P2ry12 <= 3 AND Cd3e <= 2 AND Cd8a <= 0 AND Dmbt1 <= 0 AND Epcam <= 8 AND Krt13 <= 0 AND Cd3e <= 0 AND Cd3g <= 0 AND Trem2 <= 0 AND Ttr <= 0 AND Gc <= 0 AND Krt15 <= 1 AND Krt5 <= 0 AND Ctsd > 199 AND Mobp <= 4 AND Perp <= 16 AND Gpr34 <= 70 AND Csf1r <= 280 AND Lpcat2 <= 232 AND Crybb1 <= 2 AND Scel <= 0 AND Chga > 0 AND C1qb <= 0 AND Hpgds <= 0	Marrow
Rule957	Ptprcap > 8 AND P2ry12 <= 3 AND Cd3e <= 2 AND Cd8a <= 0 AND Dmbt1 <= 0 AND Epcam <= 8 AND Krt13 <= 0 AND Cd3e <= 0 AND Cd3g <= 0 AND Ttr <= 0 AND Krt15 <= 1 AND C1qa <= 0 AND Gc <= 0 AND Krt5 <= 0 AND Fcrls <= 0 AND Ctsd > 199 AND Mobp <= 4 AND Perp <= 16 AND Gpr34 <= 70 AND Csf1r <= 378 AND Crybb1 <= 2 AND Chga <= 0 AND B4galnt2 <= 0 AND Pitx2 <= 6 AND Dsp <= 0 AND Ptprc > 1857 AND Tspan8 <= 0 A…	Marrow
Rule958	Ptprcap > 8 AND P2ry12 <= 3 AND Cd3e <= 2 AND Cd8a <= 0 AND Dmbt1 <= 0 AND Epcam <= 8 AND Krt13 <= 0 AND Cd3e <= 0 AND Cd3g <= 1 AND Trem2 <= 0 AND Ttr <= 0 AND Lgals7 > 0 AND Lgals4 <= 0 AND Krt8 <= 0	Fat
Rule959	Ptprcap > 8 AND P2ry12 <= 3 AND Cd3e <= 2 AND Cd8a <= 0 AND Dmbt1 <= 0 AND Epcam <= 8 AND Krt13 <= 0 AND Cd3e <= 0 AND Cd3g <= 1 AND Trem2 <= 0 AND Ttr <= 0 AND Gc <= 0 AND Krt15 <= 1 AND Ctsd > 379 AND Clca2 <= 0 AND Gpr34 <= 70 AND Csf1r <= 280 AND Perp <= 1 AND Lpcat2 <= 232 AND B4galnt2 <= 0 AND Krt5 <= 0 AND Crybb1 <= 2 AND Resp18 <= 0 AND Guca2a > 0	Marrow
Rule960	Ptprcap > 8 AND P2ry12 <= 3 AND Cd3e <= 2 AND Cd8a <= 0 AND Dmbt1 <= 0 AND Epcam <= 8 AND Krt13 <= 0 AND Cd3e <= 0 AND Cd3g <= 1 AND Trem2 <= 0 AND Ttr <= 0 AND Gc <= 0 AND Krt15 <= 1 AND Ctsd > 379 AND Clca2 <= 0 AND Gpr34 <= 70 AND Csf1r <= 280 AND Perp <= 1 AND Lpcat2 <= 232 AND B4galnt2 <= 0 AND Krt5 <= 0 AND Crybb1 <= 2 AND Resp18 <= 0 AND Ctsd <= 1999 AND Ins2 > 1 AND Tcf7 <= 2	Fat
Rule961	Ptprcap > 8 AND P2ry12 <= 3 AND Cd3e <= 2 AND Cd8a <= 0 AND Dmbt1 <= 0 AND Epcam <= 8 AND Krt13 <= 0 AND Cd3e <= 0 AND Cd3d > 5 AND Laptm5 <= 3	Muscle
Rule962	Ptprcap > 8 AND P2ry12 <= 3 AND Cd3e <= 2 AND Cd8a <= 0 AND Dmbt1 <= 0 AND Epcam <= 8 AND Krt13 <= 0 AND Cd3e <= 0 AND Cd3g <= 1 AND Trem2 <= 0 AND Ttr <= 0 AND Gc <= 0 AND Krt15 <= 1 AND Krt5 <= 0 AND Ctsd > 199 AND Clca2 <= 0 AND Perp <= 16 AND Gpr34 <= 70 AND Csf1r <= 280 AND Lpcat2 <= 232 AND Crybb1 <= 2 AND Chga > 0 AND Scel <= 0	Fat
Rule963	Ptprcap > 8 AND P2ry12 <= 3 AND Cd3e <= 2 AND Cd8a <= 0 AND Dmbt1 <= 0 AND Epcam <= 8 AND Krt13 <= 0 AND Cd3e <= 0 AND Cd3g <= 1 AND Trem2 <= 0 AND Ttr <= 0 AND Gc <= 0 AND Krt15 <= 1 AND Krt5 <= 0 AND Ctsd > 199 AND Clca2 <= 0 AND Perp <= 16 AND Gpr34 <= 70 AND Csf1r <= 280 AND Lpcat2 <= 232 AND Crybb1 <= 2 AND Chga <= 0 AND Resp18 <= 0 AND B4galnt2 <= 0 AND Cd3d <= 5 AND Dsp <= 0 AND Phgr1 <= 0…	Spleen
Rule964	Ptprcap > 8 AND P2ry12 <= 3 AND Cd3e <= 2 AND Cd8a <= 0 AND Dmbt1 <= 0 AND Epcam <= 8 AND Krt13 <= 0 AND Cd3e <= 0 AND Cd3g <= 1 AND Trem2 <= 0 AND Ttr <= 0 AND Gc <= 0 AND Krt15 <= 1 AND Krt5 <= 0 AND Ctsd > 199 AND Clca2 <= 0 AND Perp <= 16 AND Gpr34 <= 70 AND Csf1r <= 280 AND Lpcat2 <= 232 AND Crybb1 <= 2 AND Chga <= 0 AND Resp18 <= 0 AND B4galnt2 <= 0 AND Cd3d <= 5 AND Dsp <= 0 AND Phgr1 <= 0…	Fat
Rule965	Ptprcap > 8 AND P2ry12 <= 3 AND Cd3e <= 2 AND Cd8a <= 0 AND Dmbt1 <= 0 AND Epcam <= 8 AND Krt13 <= 0 AND Cd3e <= 0 AND Cd3g <= 1 AND Trem2 <= 0 AND Ttr <= 0 AND Gc <= 0 AND Krt15 <= 1 AND Krt5 <= 0 AND Ctsd > 199 AND Clca2 <= 0 AND Perp <= 16 AND Gpr34 <= 70 AND Csf1r <= 280 AND Lpcat2 <= 232 AND Crybb1 <= 2 AND Chga <= 0 AND Resp18 <= 0 AND B4galnt2 <= 0 AND Cd3d <= 5 AND Dsp <= 0 AND Phgr1 <= 0…	Marrow
Rule966	Ptprcap > 8 AND P2ry12 <= 3 AND Cd3e <= 2 AND Cd8a <= 0 AND Dmbt1 <= 0 AND Epcam <= 8 AND Krt13 <= 0 AND Cd3e <= 0 AND Cd3g <= 1 AND Trem2 <= 0 AND Ttr <= 0 AND Gc <= 0 AND Krt15 <= 1 AND Krt5 <= 0 AND Ctsd > 199 AND Clca2 <= 0 AND Perp <= 16 AND Gpr34 <= 70 AND Csf1r <= 280 AND Lpcat2 <= 232 AND Crybb1 <= 2 AND Chga <= 0 AND Resp18 <= 0 AND B4galnt2 <= 0 AND Cd3d <= 5 AND Hexb > 299 AND Ptprcap …	Fat
Rule967	Ptprcap > 8 AND P2ry12 <= 3 AND Cd3e <= 2 AND Cd8a <= 0 AND Dmbt1 <= 0 AND Epcam <= 8 AND Krt13 <= 0 AND Cd3e <= 0 AND Cd3g <= 1 AND Trem2 <= 0 AND Ttr <= 0 AND Gc <= 0 AND Krt15 <= 1 AND Krt5 <= 0 AND Ctsd > 199 AND Clca2 <= 0 AND Perp <= 16 AND Gpr34 <= 70 AND Csf1r <= 280 AND Dmkn <= 0 AND Crybb1 <= 2 AND Resp18 <= 0 AND Pitx2 <= 6 AND B4galnt2 <= 0 AND Tmem119 <= 1 AND Cd3d <= 5 AND Ins2 <= 5…	Spleen
Rule968	Ptprcap > 8 AND P2ry12 <= 3 AND Cd3e <= 2 AND Cd8a <= 0 AND Dmbt1 <= 0 AND Epcam <= 8 AND Krt13 <= 0 AND Cd3e <= 0 AND Cd3g <= 1 AND Trem2 <= 0 AND Ttr <= 0 AND Gc <= 0 AND Krt15 <= 1 AND Mobp > 0 AND Clca2 <= 0 AND Tmem119 <= 1 AND Gpr34 <= 0 AND Rac2 <= 1671 AND Mbp > 0	Spleen
Rule969	Ptprcap > 8 AND P2ry12 <= 3 AND Cd3e <= 2 AND Cd8a <= 0 AND Dmbt1 <= 0 AND Epcam <= 8 AND Krt13 <= 0 AND Cd3e <= 0 AND Cd3g <= 1 AND Trem2 <= 0 AND Ttr <= 0 AND Gc <= 0 AND Krt5 <= 0 AND Krt15 <= 1 AND Ctsd > 199 AND Mobp <= 4 AND Perp <= 16 AND Gpr34 <= 70 AND Csf1r <= 280 AND Dmkn <= 0 AND Crybb1 <= 2 AND Resp18 <= 0 AND Pitx2 <= 6 AND B4galnt2 <= 0 AND Tmem119 <= 1 AND Cd3d <= 5 AND Hexb <= 38…	Spleen
Rule970	Ptprcap > 8 AND P2ry12 <= 3 AND Cd3e <= 2 AND Cd8a <= 0 AND Dmbt1 <= 0 AND Epcam <= 8 AND Krt13 <= 0 AND Cd3e <= 0 AND Cd3g <= 1 AND Trem2 <= 0 AND Ttr <= 0 AND Gc <= 0 AND Krt5 <= 0 AND Krt15 <= 1 AND Ctsd > 199 AND Mobp <= 4 AND Perp <= 16 AND Gpr34 <= 70 AND Csf1r <= 280 AND Dmkn <= 0 AND Crybb1 <= 2 AND Resp18 <= 0 AND Pitx2 <= 6 AND B4galnt2 <= 0 AND Tmem119 <= 1 AND Cd3d <= 5 AND Hexb <= 38…	Marrow
Rule971	Ptprcap > 8 AND P2ry12 <= 3 AND Cd3e <= 2 AND Cd8a <= 0 AND Dmbt1 <= 0 AND Epcam <= 8 AND Krt13 <= 0 AND Cd3e <= 0 AND Cd3g <= 1 AND Trem2 <= 0 AND Ttr <= 0 AND Gc <= 0 AND Krt5 <= 0 AND Krt15 <= 1 AND Ctsd > 199 AND Mobp <= 4 AND Perp <= 16 AND Gpr34 <= 70 AND Csf1r <= 280 AND Dmkn <= 0 AND Crybb1 <= 2 AND Resp18 <= 0 AND Pitx2 <= 6 AND B4galnt2 <= 0 AND Tmem119 <= 1 AND Cd3d <= 5 AND Ins2 <= 5 …	Spleen
Rule972	Ptprcap > 8 AND P2ry12 <= 3 AND Cd3e <= 2 AND Cd8a <= 0 AND Dmbt1 <= 0 AND Epcam <= 8 AND Krt13 <= 0 AND Cd3e <= 0 AND Cd3g <= 1 AND Trem2 <= 0 AND Ttr <= 0 AND Gc <= 0 AND Ctsd <= 199 AND Cldn3 > 0 AND Ins2 <= 1 AND Chga <= 0 AND Pigr <= 0	Marrow
Rule973	Ptprcap > 8 AND P2ry12 <= 3 AND Cd3e <= 2 AND Cd8a <= 0 AND Dmbt1 <= 0 AND Epcam <= 8 AND Krt13 <= 0 AND Cd3e <= 0 AND Cd3g <= 1 AND Trem2 <= 0 AND Ttr <= 0 AND Gc <= 0 AND Ctsd <= 199 AND Cd79b > 369 AND Krt5 <= 0 AND Aqp3 <= 0 AND C1qb <= 0 AND Fcrls <= 0 AND Krt15 <= 0 AND Ctsd <= 191 AND Pcsk1n <= 0 AND Ins2 <= 0 AND Perp > 0 AND Ptprc > 105	Marrow
Rule974	Ptprcap > 8 AND P2ry12 <= 3 AND Cd3e <= 2 AND Cd8a <= 0 AND Dmbt1 <= 0 AND Epcam <= 8 AND Krt13 <= 0 AND Cd3e <= 0 AND Cd3g <= 1 AND Trem2 <= 0 AND Ttr <= 0 AND Gc <= 0 AND Ctsd <= 199 AND Cd79b > 369 AND Perp <= 0 AND Aqp3 > 0 AND C1qc <= 0 AND Lpcat2 <= 0 AND Rac2 <= 700	Marrow
Rule975	Ptprcap > 8 AND P2ry12 <= 3 AND Cd3e <= 2 AND Cd8a <= 0 AND Dmbt1 <= 0 AND Epcam <= 8 AND Krt13 <= 0 AND Cd3e <= 0 AND Cd3g <= 1 AND Slc2a5 > 0 AND Cldn3 <= 0 AND Sfn <= 0 AND Resp18 <= 0 AND Krt19 <= 0 AND Ctsd <= 3	Spleen
Rule976	Ptprcap > 8 AND P2ry12 <= 3 AND Cd3e <= 2 AND Cd8a <= 0 AND Dmbt1 <= 0 AND Epcam <= 8 AND Krt13 <= 0 AND Slc2a5 <= 0 AND Cd3e <= 0 AND Cd3g <= 1 AND Mobp > 0 AND Clca2 <= 0 AND Tmem119 <= 1 AND Phgr1 <= 0 AND Hexb <= 249 AND Cd79b <= 2736 AND Gc <= 0 AND Sfn <= 0 AND Krt5 <= 0 AND Ptprcap <= 433	Marrow
Rule977	Ptprcap > 8 AND P2ry12 <= 3 AND Cd3e <= 2 AND Cd8a <= 0 AND Dmbt1 <= 0 AND Epcam <= 8 AND Krt13 <= 0 AND Cd3e <= 0 AND Cd3g <= 1 AND Slc2a5 <= 0 AND Mobp > 0 AND Clca2 <= 0 AND Tmem119 <= 1 AND Gc <= 0 AND Cd79b <= 2736 AND Phgr1 <= 0	Fat
Rule978	Ptprcap > 8 AND P2ry12 <= 3 AND Cd3e <= 2 AND Cd8a <= 0 AND Dmbt1 <= 0 AND Epcam <= 8 AND Krt13 <= 0 AND Slc2a5 <= 0 AND Cd3e <= 0 AND Cd3g <= 1 AND Ttr <= 0 AND C1qa <= 0 AND Cd79b > 8 AND Cd79b <= 363 AND Fcrls <= 0 AND Ins2 > 1 AND Mbp <= 35	Fat
Rule979	Ptprcap > 8 AND P2ry12 <= 3 AND Cd3e <= 2 AND Cd8a <= 0 AND Dmbt1 <= 0 AND Pigr > 25 AND Hpgds <= 39 AND Ctsd <= 10 AND Gpr34 <= 0 AND Krt19 <= 0 AND C1qc <= 0	Marrow
Rule980	Ptprcap > 8 AND P2ry12 <= 3 AND Cd3e <= 2 AND Pigr > 25 AND Gpr34 <= 0 AND Krt14 <= 0 AND Ctsd <= 55	Spleen
Rule981	Ptprcap > 8 AND P2ry12 <= 3 AND Cd3e <= 2 AND Pigr > 38 AND Hexb <= 0	Liver
Rule982	Ptprcap > 8 AND P2ry12 <= 3 AND Cd3e <= 2 AND Cd8a <= 0 AND Epcam > 8 AND Krt14 <= 33 AND Col17a1 <= 0 AND Fosl1 <= 0 AND B4galnt2 <= 2 AND Tmem119 > 0 AND C1qc <= 1	Fat
Rule983	Ptprcap > 8 AND P2ry12 <= 3 AND Cd3e <= 2 AND Epcam > 8 AND Krt14 > 32	Thymus
Rule984	Ptprcap > 8 AND P2ry12 <= 3 AND Cd3e <= 2 AND Cd8a <= 0 AND Dmbt1 <= 0 AND Epcam > 8 AND Tmem119 <= 0 AND Col17a1 <= 0 AND B4galnt2 <= 2 AND Rac2 > 1065 AND Krt13 <= 0 AND Hpgds <= 16 AND Cldn3 <= 0 AND Lgals4 <= 0 AND Ptprcap > 269 AND Ptprcap <= 1903	Lung
Rule985	Ptprcap > 8 AND P2ry12 <= 3 AND Cd3e <= 2 AND Cd8a <= 0 AND Dmbt1 <= 0 AND Trem2 <= 0 AND Ttr <= 0 AND Guca2a <= 0 AND Krt13 <= 0 AND Krt15 <= 1 AND Cd8b1 > 0 AND Csf1r <= 0 AND Ptprcap <= 232	Brain Neurons
Rule986	Ptprcap > 8 AND P2ry12 <= 3 AND Cd3e <= 2 AND Cd8a <= 0 AND Dmbt1 <= 0 AND Trem2 <= 0 AND Guca2a <= 0 AND Krt13 <= 0 AND Ttr <= 0 AND Krt15 <= 1 AND Prss2 > 0 AND Gpr34 <= 0 AND Rac2 > 753	Marrow
Rule987	Ptprcap > 8 AND P2ry12 <= 3 AND Cd3e <= 2 AND Cd8a <= 0 AND Dmbt1 <= 0 AND Trem2 <= 0 AND Guca2a <= 0 AND Krt13 <= 0 AND Ttr <= 0 AND Krt15 <= 1 AND Siglech > 1 AND Krt8 <= 0 AND Laptm5 > 178	Marrow
Rule988	Ptprcap > 8 AND P2ry12 <= 3 AND Cd3e <= 0 AND Cd8a > 0 AND Krt8 <= 11 AND Coro1a <= 164 AND Hexb <= 1	Spleen
Rule989	Ptprcap > 8 AND P2ry12 <= 3 AND Cd3e <= 0 AND Cd8a > 0 AND Csf1r <= 0 AND Perp <= 0 AND Coro1a > 162 AND Myb <= 0 AND Cx3cr1 <= 0	Lung
Rule990	Ptprcap > 8 AND P2ry12 <= 3 AND Cd3e <= 0 AND Cd8a > 0 AND Krt8 <= 9 AND Coro1a > 104	Muscle
Rule991	Ptprcap > 8 AND P2ry12 <= 3 AND Cd3e <= 0 AND Cd3d > 5 AND Krt5 <= 1 AND Rac2 > 9 AND Tcf7 > 41 AND Ptprcap > 56	Marrow
Rule992	Ptprcap > 8 AND P2ry12 <= 3 AND Cd3g <= 1 AND Dmbt1 <= 0 AND Cd3e > 0 AND Krt6a <= 0 AND Hexb <= 95	Spleen
Rule993	Ptprcap > 8 AND P2ry12 <= 3 AND Cd3g <= 1 AND Dmbt1 <= 0 AND Krt13 <= 0 AND Slc2a5 <= 0 AND Ttr <= 0 AND Clca2 > 0 AND P2ry12 > 0	Fat
Rule994	Ptprcap > 8 AND P2ry12 <= 3 AND Cd3g <= 1 AND Dmbt1 <= 0 AND Krt13 <= 0 AND Slc2a5 <= 0 AND Ttr <= 0 AND Krt15 > 2 AND Krt5 > 0 AND Rac2 <= 764	Spleen
Rule995	Ptprcap > 8 AND P2ry12 <= 3 AND Cd3g <= 1 AND Dmbt1 <= 0 AND Krt13 <= 0 AND Slc2a5 <= 0 AND Ttr <= 0 AND Krt15 > 2 AND Perp <= 0 AND Ptprcap <= 873 AND Ctsd <= 73	Fat
Rule996	Ptprcap > 8 AND P2ry12 <= 3 AND Cd3g <= 1 AND Dmbt1 <= 0 AND Krt13 <= 0 AND Slc2a5 <= 0 AND Ttr <= 0 AND Krt15 > 2 AND Csf1r > 0	Liver
Rule997	Ptprcap > 8 AND P2ry12 <= 3 AND Cd3g <= 1 AND Dmbt1 <= 0 AND Ttr <= 0 AND Krt13 <= 0 AND Cd3d > 7 AND Tcf7 > 7	Lung
Rule998	Ptprcap > 8 AND P2ry12 <= 3 AND Cd3g <= 1 AND Dmbt1 <= 0 AND Krt13 <= 0 AND Ttr <= 0 AND Epcam <= 136 AND C1qa <= 0 AND Krt15 <= 1 AND Gc <= 0 AND Mobp > 0 AND Mbp <= 4 AND Clca2 <= 0	Spleen
Rule999	Ptprcap > 8 AND P2ry12 <= 3 AND Cd3g <= 1 AND Dmbt1 <= 0 AND Krt13 <= 0 AND Ttr <= 0 AND Epcam <= 136 AND C1qa <= 0 AND Mobp > 0 AND Krt8 <= 0 AND Hexb <= 19	Muscle
Rule1000	Ptprcap > 8 AND P2ry12 <= 3 AND Cd3g <= 1 AND Dmbt1 <= 0 AND Krt13 <= 0 AND Ttr <= 0 AND Epcam <= 136 AND C1qa <= 0 AND Krt15 <= 1 AND Gc <= 0 AND Krt5 <= 0 AND Cd79b > 369 AND Aqp3 <= 0 AND C1qb > 0 AND Perp <= 0 AND Sfn > 7 AND P2ry12 > 0 AND Krt14 > 0	Spleen
Rule1001	Ptprcap > 8 AND P2ry12 <= 3 AND Cd3g <= 1 AND Dmbt1 <= 0 AND Krt13 <= 0 AND Trem2 <= 0 AND Ttr <= 0 AND Epcam <= 136 AND Gc <= 0 AND Cd79b > 369 AND Aqp3 <= 0 AND Krt15 <= 1 AND Krt5 <= 0 AND C1qb <= 0 AND Fcrls <= 0 AND Perp > 0 AND Epcam <= 17 AND Hexb <= 3	Spleen
Rule1002	Ptprcap > 8 AND P2ry12 <= 3 AND Cd3g <= 1 AND Dmbt1 <= 0 AND Ckmt1 > 0 AND Anxa8 <= 0 AND Ttr <= 0 AND Gpx2 <= 0 AND Epcam <= 611 AND Sfn <= 0 AND Cd79b <= 0	Fat
Rule1003	Ptprcap > 8 AND P2ry12 <= 3 AND Cd3g <= 1 AND Dmbt1 <= 0 AND Trem2 <= 0 AND Krt13 <= 0 AND Ttr <= 0 AND Epcam <= 136 AND Gc <= 0 AND Cd79b > 369 AND Perp <= 0 AND Aqp3 <= 0 AND C1qb > 0 AND C1qc <= 1 AND Krt8 <= 0 AND Sfn > 7 AND Gpr34 <= 0 AND P2ry12 <= 0 AND Mbp <= 30 AND Hexb > 0	Muscle
Rule1004	Ptprcap > 8 AND P2ry12 <= 3 AND Cd3g <= 1 AND Dmbt1 <= 0 AND Trem2 <= 0 AND Krt13 <= 0 AND Ttr <= 0 AND Epcam <= 136 AND Gc <= 0 AND Cd79b > 369 AND Perp <= 0 AND Aqp3 <= 0 AND Pigr > 5 AND Epcam <= 0	Muscle
Rule1005	Ptprcap > 8 AND P2ry12 <= 3 AND Cd3g <= 1 AND Dmbt1 <= 0 AND Trem2 <= 0 AND Krt13 <= 0 AND Cd79b > 369 AND Perp <= 0 AND Gc <= 0 AND Aqp3 > 0 AND Gpr34 <= 0	Fat
Rule1006	Ptprcap > 8 AND P2ry12 <= 3 AND Cd3g <= 1 AND Dmbt1 <= 0 AND Trem2 <= 0 AND Krt13 <= 0 AND Cd79b > 369 AND Perp <= 0 AND Gc <= 0 AND Klk1 <= 0 AND Tmem119 <= 1 AND Chga > 2 AND Lgmn <= 39	Marrow
Rule1007	Ptprcap > 8 AND P2ry12 <= 3 AND Cd3g <= 1 AND Chga <= 1 AND Krt13 <= 0 AND Guca2a > 0 AND Ptprcap > 73 AND Krt19 <= 0 AND Tmem119 <= 0 AND Rac2 > 1032 AND Cd79b <= 1191	Lung
Rule1008	Ptprcap > 8 AND P2ry12 <= 3 AND Cd3g <= 1 AND Chga <= 1 AND Krt13 <= 0 AND Ttr <= 0 AND Krt15 <= 1 AND Cd79b > 377 AND Perp <= 0 AND Gc <= 0 AND Anxa8 <= 0 AND Tmem119 <= 1 AND Fcrls <= 0 AND Cldn3 > 0	Spleen
Rule1009	Ptprcap > 8 AND P2ry12 <= 3 AND Cd3g <= 1 AND Chga <= 1 AND Krt13 <= 0 AND Ttr <= 0 AND Krt15 <= 1 AND Cd79b > 377 AND Perp <= 0 AND Gc <= 0 AND Tmem119 <= 1 AND Anxa8 <= 0 AND Fcrls <= 0 AND Ins2 <= 0 AND C1qc <= 0 AND Gpr34 > 0 AND Hexb <= 166	Marrow
Rule1010	Ptprcap > 8 AND P2ry12 <= 3 AND Cd3g <= 1 AND Chga <= 1 AND Krt13 <= 0 AND Ttr <= 0 AND Krt15 <= 1 AND Cd79b > 377 AND Aqp3 > 0	Muscle
Rule1011	Ptprcap > 8 AND P2ry12 <= 3 AND Cd3g <= 1 AND Chga <= 1 AND Krt13 <= 0 AND Ttr <= 0 AND Krt15 <= 1 AND Cd79b > 377 AND Gc <= 0 AND Perp <= 0 AND Tmem119 <= 1 AND Anxa8 <= 0 AND Fcrls <= 0 AND Ins2 <= 0 AND Gpr34 > 0 AND P2ry12 <= 0	Fat
Rule1012	Ptprcap > 8 AND P2ry12 <= 3 AND Cd3g <= 1 AND Chga <= 1 AND Krt13 <= 0 AND Ttr <= 0 AND Krt15 <= 1 AND Cd79b > 377 AND Gc <= 0 AND Perp <= 0 AND Tmem119 <= 1 AND Fcrls <= 0 AND Dmbt1 <= 0 AND Ins2 <= 0 AND Cx3cr1 <= 0 AND C1qc <= 0 AND Dmkn > 0 AND Ptprcap <= 337	Marrow
Rule1013	Ptprcap > 8 AND P2ry12 <= 3 AND Cd3g <= 1 AND Chga <= 1 AND Krt13 <= 0 AND Ttr <= 0 AND Krt15 <= 1 AND Cd79b > 377 AND Gc <= 0 AND Perp <= 0 AND Krt17 > 0 AND P2ry12 <= 0 AND Tmem119 <= 0	Spleen
Rule1014	Ptprcap > 8 AND P2ry12 <= 3 AND Cd3g <= 1 AND Chga <= 1 AND Krt13 <= 0 AND Ttr <= 0 AND Krt15 <= 1 AND Cd79b > 377 AND Krt17 > 0 AND Ptprcap > 579	Fat
Rule1015	Ptprcap > 8 AND P2ry12 <= 3 AND Cd3g <= 1 AND Chga <= 1 AND Krt13 <= 0 AND Ttr <= 0 AND Krt15 <= 1 AND Cd79b > 377 AND Gc <= 0 AND Perp <= 0 AND Anxa8 <= 0 AND Fcrls <= 0 AND Krt5 <= 0 AND C1qa > 0 AND Krt14 > 0	Spleen
Rule1016	Ptprcap > 8 AND P2ry12 <= 3 AND Cd3g <= 1 AND Dmbt1 <= 0 AND Krt13 <= 0 AND Trem2 <= 0 AND Cd79b > 369 AND Ttr > 1 AND Ctsd > 2	Fat
Rule1017	Ptprcap > 8 AND P2ry12 <= 3 AND Cd3g <= 1 AND Dmbt1 <= 0 AND Krt13 <= 0 AND Ttr <= 0 AND Krt15 <= 1 AND C1qb > 2 AND Cdhr5 <= 0 AND Cd79b > 222	Spleen
Rule1018	Ptprcap > 8 AND P2ry12 <= 3 AND Cd3g <= 1 AND Dmbt1 <= 0 AND Krt13 <= 0 AND Ttr <= 0 AND C1qa <= 0 AND Krt15 <= 1 AND Cd79b > 369 AND Perp > 0 AND Epcam <= 17 AND Hexb <= 137	Heart
Rule1019	Ptprcap > 8 AND P2ry12 <= 3 AND Cd3g <= 1 AND Dmbt1 <= 0 AND Krt13 <= 0 AND Ttr <= 0 AND C1qa <= 0 AND Krt15 <= 1 AND Cd79b > 369 AND Perp > 0 AND Hexb <= 96	Lung
Rule1020	Ptprcap > 8 AND P2ry12 <= 3 AND Cd3g <= 1 AND Dmbt1 <= 0 AND Krt13 <= 0 AND Ttr <= 0 AND C1qa <= 0 AND Krt15 <= 1 AND Cd79b > 369 AND Gc <= 0 AND Fcrls <= 0 AND Ins2 <= 0 AND Krt5 <= 0 AND Cx3cr1 <= 0 AND Chga > 0 AND Coro1a > 1663	Spleen
Rule1021	Ptprcap > 8 AND P2ry12 <= 3 AND Cd3g <= 1 AND Dmbt1 <= 0 AND Krt13 <= 0 AND Ttr <= 0 AND Epcam <= 92 AND C1qa <= 0 AND Trem2 <= 0 AND Gc <= 0 AND Cd79b > 369 AND Perp > 0 AND Krt15 <= 1	Fat
Rule1022	Ptprcap > 8 AND P2ry12 <= 3 AND Cd3g <= 1 AND Dmbt1 <= 0 AND Krt13 <= 0 AND Ttr <= 0 AND Epcam <= 92 AND C1qa <= 0 AND Trem2 <= 0 AND Gc <= 0 AND Cd79b > 369 AND Perp > 0 AND Hexb <= 271	Marrow
Rule1023	Ptprcap > 8 AND P2ry12 <= 3 AND Cd3g <= 1 AND Dmbt1 <= 0 AND Krt13 <= 0 AND C1qb > 2 AND Cdhr5 <= 0 AND Gc <= 0	Fat
Rule1024	Ptprcap > 8 AND P2ry12 <= 3 AND Cd3g <= 1 AND Dmbt1 <= 0 AND Krt13 <= 0 AND Ttr <= 0 AND Epcam <= 92 AND C1qa <= 0 AND Trem2 <= 0 AND Gc <= 0 AND Cd79b > 369 AND Fcrls <= 0 AND Ins2 <= 0 AND Chga > 0 AND C1qb <= 0	Marrow
Rule1025	Ptprcap > 8 AND P2ry12 <= 3 AND Cd3g <= 1 AND Dmbt1 <= 0 AND Krt13 <= 0 AND Ttr <= 0 AND Epcam <= 92 AND C1qa <= 0 AND Trem2 <= 0 AND Gc <= 0 AND Cd79b > 369 AND Fcrls <= 0 AND Ins2 <= 0 AND Cdh17 <= 0 AND Krt17 <= 0 AND C1qc <= 0 AND Krt15 > 1 AND Perp <= 0	Marrow
Rule1026	Ptprcap > 8 AND P2ry12 <= 3 AND Cd3g <= 1 AND Dmbt1 <= 0 AND Krt13 <= 0 AND Ttr <= 0 AND Krt15 <= 1 AND Epcam <= 92 AND C1qa <= 0 AND Trem2 <= 0 AND Gc <= 0 AND Cd79b > 369 AND Krt5 > 0 AND Ptprcap <= 348	Liver
Rule1027	Ptprcap > 8 AND P2ry12 <= 3 AND Cd3g <= 1 AND Dmbt1 <= 0 AND Krt13 <= 0 AND Ttr <= 0 AND Krt15 <= 1 AND Epcam <= 92 AND C1qa <= 0 AND Trem2 <= 0 AND Gc <= 0 AND Krt5 > 0 AND Krt14 <= 1 AND Krt14 <= 0 AND Rac2 > 209 AND Ptprcap <= 482	Marrow
Rule1028	Ptprcap > 8 AND P2ry12 <= 3 AND Cd3g <= 1 AND Dmbt1 <= 0 AND Krt13 <= 0 AND Ttr <= 0 AND Krt15 <= 1 AND Epcam <= 92 AND C1qa <= 0 AND Trem2 <= 0 AND Gc <= 0 AND Cd79b > 369 AND Fcrls <= 0 AND Ctsd > 341 AND Tmem119 <= 0 AND Rac2 > 380	Spleen
Rule1029	Ptprcap > 8 AND P2ry12 <= 3 AND Cd3g <= 1 AND Dmbt1 <= 0 AND Krt13 <= 0 AND Ttr <= 0 AND Epcam <= 92 AND C1qa <= 0 AND Gc <= 0 AND Krt15 <= 1 AND Cd79b > 369 AND Ctsd <= 504 AND Fcrls <= 0 AND Ins2 <= 0 AND Cdh17 <= 0 AND C1qc <= 0 AND Cx3cr1 <= 0 AND Ptprc > 1 AND Ctsd <= 186 AND C1qb > 0 AND Chga <= 0 AND C1qb <= 1 AND Laptm5 <= 718	Spleen
Rule1030	Ptprcap > 8 AND P2ry12 <= 3 AND Cd3g <= 1 AND Dmbt1 <= 0 AND Krt13 <= 0 AND Ttr <= 0 AND Epcam <= 92 AND C1qa <= 0 AND Gc <= 0 AND Cd79b > 374 AND Ctsd <= 504 AND Fcrls <= 0 AND C1qb <= 0 AND Rac2 > 145 AND Cldn7 <= 0 AND Krt17 <= 0 AND Ctsd <= 191 AND Krt19 > 0 AND Cd79b <= 2603 AND 2210415F13Rik <= 0	Fat
Rule1031	Ptprcap > 8 AND P2ry12 <= 3 AND Cd3g <= 1 AND Dmbt1 <= 0 AND Krt13 <= 0 AND Ttr <= 0 AND Epcam <= 92 AND C1qa <= 0 AND Gc <= 0 AND Krt5 > 0 AND C1qc <= 1 AND Krt8 <= 0 AND Gpr34 <= 0 AND Ptprcap > 73	Fat
Rule1032	Ptprcap > 8 AND P2ry12 <= 3 AND Cd3g <= 1 AND Dmbt1 <= 0 AND Krt13 <= 0 AND Ttr <= 0 AND Epcam <= 92 AND C1qa <= 0 AND Csf1r > 1 AND Gpr34 <= 0 AND Sfn <= 2 AND Epcam <= 0 AND Fcrls <= 0 AND Hexb > 1 AND P2ry13 <= 0 AND Sfn <= 1	Marrow
Rule1033	Ptprcap > 8 AND P2ry12 <= 3 AND Cd3g <= 1 AND Dmbt1 <= 0 AND Krt13 <= 0 AND Ttr <= 0 AND Epcam <= 92 AND C1qa <= 0 AND Csf1r > 1 AND Epcam <= 0 AND Krt14 <= 0 AND Fcrls <= 0 AND Myb <= 0 AND Ctsd <= 246 AND Coro1a > 110	Spleen
Rule1034	Ptprcap > 8 AND P2ry12 <= 3 AND Cd3g <= 1 AND Chga <= 1 AND Krt13 <= 0 AND Ttr <= 0 AND C1qa <= 0 AND Csf1r <= 1 AND Cd79b > 377 AND Ctsd > 504 AND Tmem119 <= 0	Fat
Rule1035	Ptprcap > 8 AND P2ry12 <= 3 AND Cd3g <= 1 AND Chga <= 1 AND Krt13 <= 0 AND Ttr <= 0 AND C1qa <= 0 AND Csf1r <= 1 AND Cd79b > 377 AND Anxa8 > 0 AND P2ry12 <= 0	Heart
Rule1036	Ptprcap > 8 AND P2ry12 <= 3 AND Cd3g <= 1 AND Chga <= 1 AND Krt13 <= 0 AND Ttr <= 0 AND Csf1r <= 1 AND C1qa <= 0 AND Cd79b > 377 AND Gc <= 0 AND Fcrls <= 0 AND C1qb <= 0 AND Ins2 <= 0 AND Cdh17 <= 0 AND Csf1r > 0	Fat
Rule1037	Ptprcap > 8 AND P2ry12 <= 3 AND Cd3g <= 1 AND Chga <= 1 AND Krt13 <= 0 AND Ttr <= 0 AND C1qa <= 0 AND Csf1r <= 1 AND Cd79b > 377 AND Gc <= 0 AND Fcrls <= 0 AND C1qb <= 0 AND Ins2 <= 0 AND Cdh17 > 0	Fat
Rule1038	Ptprcap > 8 AND P2ry12 <= 3 AND Cd3g <= 1 AND Chga <= 1 AND Krt13 <= 0 AND Ttr <= 0 AND C1qa <= 0 AND Csf1r <= 1 AND Cd79b > 377 AND Gc <= 0 AND Fcrls <= 0 AND C1qb <= 0 AND Ins2 <= 0 AND C1qc <= 0 AND Krt15 > 1 AND Hexb <= 258	Fat
Rule1039	Ptprcap > 8 AND P2ry12 <= 3 AND Cd3g <= 1 AND Chga <= 1 AND Krt13 <= 0 AND Ttr <= 0 AND C1qa <= 0 AND Csf1r <= 1 AND Cd79b > 377 AND Gc <= 0 AND Fcrls <= 0 AND C1qb <= 0 AND Ins2 <= 0 AND C1qc <= 0 AND Tmem119 <= 0 AND Krt14 > 0 AND Prss32 <= 0 AND Mbp <= 3 AND Lgmn > 1	Spleen
Rule1040	Ptprcap > 8 AND P2ry12 <= 3 AND Cd3g <= 1 AND Chga <= 1 AND Krt13 <= 0 AND Ttr <= 0 AND C1qa <= 0 AND Csf1r <= 1 AND Cd79b > 453 AND Gc <= 0 AND Fcrls <= 0 AND Krt14 <= 0 AND Chga <= 0 AND C1qb <= 0 AND Ins2 <= 2 AND Krt15 <= 0 AND Tmem119 > 0 AND C1qc <= 0 AND Mbp <= 0 AND Laptm5 > 51	Marrow
Rule1041	Ptprcap > 8 AND P2ry12 <= 3 AND Cd3g <= 1 AND Chga <= 1 AND Krt13 <= 0 AND Ttr <= 0 AND C1qa <= 0 AND Csf1r <= 1 AND Cd79b > 453 AND Gc <= 0 AND Fcrls <= 0 AND Krt14 <= 0 AND Chga <= 0 AND C1qb <= 0 AND Ins2 <= 2 AND Krt15 <= 0 AND Tmem119 > 0 AND Ptprcap > 416	Spleen
Rule1042	Ptprcap > 8 AND P2ry12 <= 3 AND Cd3g <= 1 AND Chga <= 1 AND Krt13 <= 0 AND Ttr <= 0 AND C1qa <= 0 AND Csf1r <= 1 AND Cd79b > 453 AND Gc <= 0 AND Fcrls <= 0 AND Krt14 <= 0 AND Chga <= 0 AND C1qb <= 0 AND Cx3cr1 > 0 AND Mbp <= 0	Fat
Rule1043	Ptprcap > 8 AND P2ry12 <= 3 AND Cd3g <= 1 AND Chga <= 1 AND Krt13 <= 0 AND Ttr <= 0 AND C1qa <= 0 AND Csf1r <= 1 AND Cd79b > 453 AND Gc <= 0 AND Fcrls <= 0 AND Krt14 <= 0 AND Ins2 <= 0 AND Cx3cr1 <= 0 AND C1qb <= 0 AND C1qc > 0 AND Krt15 <= 0	Marrow
Rule1044	Ptprcap > 8 AND P2ry12 <= 3 AND Cd3g <= 1 AND Chga <= 1 AND Krt13 <= 0 AND Ttr <= 0 AND C1qa <= 0 AND Csf1r <= 1 AND Cd79b > 453 AND Gc <= 0 AND Fcrls <= 0 AND Krt14 <= 0 AND Ins2 <= 0 AND Cx3cr1 <= 0 AND C1qc <= 0 AND Tmem119 <= 0 AND C1qb <= 0 AND Rac2 > 145 AND Ctsd <= 178 AND P2ry13 <= 0 AND Pcsk1n <= 0 AND Rac2 > 149 AND Krt15 <= 0 AND Cd79b > 4454	Marrow
Rule1045	Ptprcap > 8 AND P2ry12 <= 3 AND Cd3g <= 1 AND Chga <= 1 AND Krt13 <= 0 AND Ttr <= 0 AND Csf1r <= 1 AND C1qa <= 0 AND Cd79b > 377 AND Gc <= 0 AND Fcrls <= 0 AND C1qc > 0 AND Ctsd <= 0 AND Krt15 <= 0	Fat
Rule1046	Ptprcap > 8 AND P2ry12 <= 3 AND Cd3g <= 1 AND Chga <= 1 AND Krt13 <= 0 AND Ttr <= 0 AND C1qa <= 0 AND Csf1r <= 1 AND Cd79b > 377 AND Gc <= 0 AND Fcrls <= 0 AND Ins2 <= 0 AND Krt6a <= 0 AND C1qc > 0 AND Krt15 <= 0 AND Cd79b <= 1508	Spleen
Rule1047	Ptprcap > 8 AND P2ry12 <= 3 AND Cd3g <= 1 AND Chga <= 1 AND Krt13 <= 0 AND Ttr <= 0 AND Csf1r <= 1 AND C1qa <= 0 AND Cd79b > 377 AND Gc <= 0 AND Fcrls <= 0 AND C1qc > 0 AND Ins2 > 2	Spleen
Rule1048	Ptprcap > 8 AND P2ry12 <= 3 AND Cd3g <= 1 AND Chga <= 1 AND Krt13 <= 0 AND Ttr <= 0 AND C1qa <= 0 AND Csf1r <= 1 AND Krt15 <= 1 AND Guca2a > 0 AND Ctsd <= 11	Muscle
Rule1049	Ptprcap > 8 AND P2ry12 <= 3 AND Cd3g <= 1 AND Chga <= 1 AND Krt13 <= 0 AND Ttr <= 0 AND C1qa <= 0 AND Csf1r <= 1 AND Krt15 <= 1 AND Trem2 > 0 AND Cx3cr1 <= 0 AND Laptm5 <= 1130	Marrow
Rule1050	Ptprcap > 8 AND P2ry12 <= 3 AND Cd3g <= 1 AND Chga <= 1 AND Krt13 <= 0 AND Ttr <= 0 AND Csf1r <= 1 AND Krt15 <= 1 AND C1qa <= 0 AND Ctsd > 1995 AND Tmem119 <= 0 AND Hexb <= 1 AND Ptprc > 723	Lung
Rule1051	Ptprcap > 8 AND P2ry12 <= 3 AND Cd3g <= 1 AND Chga <= 1 AND Krt13 <= 0 AND Ttr <= 0 AND Csf1r <= 1 AND Krt15 <= 1 AND C1qa <= 0 AND Cd79b > 377 AND Gc <= 0 AND C1qc > 0 AND P2ry12 <= 0 AND Krt15 > 0	Lung
Rule1052	Ptprcap > 8 AND P2ry12 <= 3 AND Cd3g <= 1 AND Chga <= 1 AND Krt13 <= 0 AND Ttr <= 0 AND Csf1r <= 1 AND Krt15 <= 1 AND C1qa <= 0 AND Cd79b > 377 AND Ptprc <= 1640 AND Fcrls <= 0 AND Gc > 0 AND Lgmn <= 28 AND Ptprc <= 226	Spleen
Rule1053	Ptprcap > 8 AND P2ry12 <= 3 AND Cd3g <= 1 AND Chga <= 1 AND Krt13 <= 0 AND Ttr <= 0 AND Gc <= 0 AND Cd79b > 377 AND Perp > 0	Muscle
Rule1054	Ptprcap > 8 AND P2ry12 <= 3 AND Cd3g <= 1 AND Chga <= 1 AND Krt13 <= 0 AND Ttr <= 0 AND Gc <= 0 AND Cd79b > 377 AND Krt15 > 1 AND Lgmn <= 75 AND Hexb <= 0	Liver
Rule1055	Ptprcap > 8 AND P2ry12 <= 3 AND Cd3g <= 1 AND Chga <= 1 AND Krt13 <= 0 AND Ttr <= 0 AND Gc <= 0 AND Cd79b > 377 AND C1qc > 0 AND Sfn <= 20 AND P2ry12 <= 1	Marrow
Rule1056	Ptprcap > 8 AND P2ry12 <= 3 AND Cd3g <= 1 AND Chga <= 1 AND Krt13 <= 0 AND Ttr <= 0 AND Gc <= 0 AND Csf1r <= 1 AND Krt5 <= 0 AND Cd79b > 377 AND C1qc > 0 AND P2ry12 <= 1	Fat
Rule1057	Ptprcap > 8 AND P2ry12 <= 3 AND Cd3g <= 1 AND Chga <= 1 AND Krt13 <= 0 AND Ttr <= 0 AND Gc <= 0 AND Cd79b > 377 AND Ins2 <= 0 AND Krt6a <= 0 AND Cx3cr1 <= 0 AND C1qa <= 0 AND Fcrls <= 0 AND C1qb <= 0 AND Krt14 <= 0 AND Ptprc > 1 AND Krt15 <= 0 AND P2ry12 > 0 AND Cd79b <= 2338	Spleen
Rule1058	Ptprcap > 8 AND P2ry12 <= 3 AND Cd3g <= 1 AND Chga <= 1 AND Krt13 <= 0 AND Ttr <= 0 AND Gc <= 0 AND Cd79b > 377 AND Ins2 <= 0 AND Krt6a <= 0 AND Cx3cr1 > 0 AND Ctsd > 0 AND Sfn <= 10	Spleen
Rule1059	Ptprcap > 8 AND P2ry12 <= 3 AND Cd3g <= 1 AND Chga <= 1 AND Krt13 <= 0 AND Ttr <= 0 AND Gc <= 0 AND Cd79b > 377 AND Ins2 <= 0 AND Cx3cr1 > 0 AND Hexb <= 1	Muscle
Rule1060	Ptprcap > 8 AND P2ry12 <= 3 AND Cd3g <= 1 AND Chga <= 1 AND Krt13 <= 0 AND Ttr <= 0 AND Gc <= 0 AND Cd79b > 377 AND Ins2 <= 0 AND Krt6a <= 0 AND C1qa <= 0 AND Fcrls <= 0 AND C1qb <= 0 AND Krt14 > 0 AND Ptprc > 356 AND Hexb <= 0	Marrow
Rule1061	Ptprcap > 8 AND P2ry12 <= 3 AND Cd3g <= 1 AND Chga <= 1 AND Krt13 <= 0 AND Ttr <= 0 AND Gc <= 0 AND Cd79b > 377 AND Ins2 <= 0 AND Krt6a <= 0 AND C1qa <= 0 AND C1qb <= 0 AND Fcrls <= 0 AND Krt14 <= 0 AND Ptprc > 1 AND Krt15 <= 0 AND P2ry12 <= 0 AND Krt8 > 0 AND Ptprcap > 24 AND Col17a1 <= 0 AND Mbp <= 114 AND 2210415F13Rik <= 0 AND Capns2 <= 78 AND Lgmn <= 435 AND Epcam <= 0 AND Hpgds <= 1 AND Mbp…	Spleen
Rule1062	Ptprcap > 8 AND P2ry12 <= 3 AND Cd3g <= 1 AND Chga <= 1 AND Krt13 <= 0 AND Ttr <= 0 AND Gc <= 0 AND Cd79b > 377 AND Ins2 <= 0 AND Krt6a <= 0 AND C1qa <= 0 AND Fcrls <= 0 AND C1qb <= 0 AND Krt14 <= 0 AND Ptprc > 1 AND Krt15 <= 0 AND P2ry12 <= 0 AND Laptm5 > 1276 AND Mbp <= 356 AND Rac2 > 209	Spleen
Rule1063	Ptprcap > 8 AND P2ry12 <= 3 AND Cd3g <= 1 AND Chga <= 1 AND Krt13 <= 0 AND Ttr <= 0 AND Gc <= 0 AND Cd79b > 377 AND Ptprc <= 1640 AND Laptm5 <= 1159 AND Krt6a > 0	Marrow
Rule1064	Ptprcap > 8 AND P2ry12 <= 3 AND Cd3g <= 1 AND Chga <= 1 AND Krt13 <= 0 AND Ttr <= 0 AND Gc <= 0 AND Cd79b > 377 AND Ptprc <= 1640 AND Laptm5 <= 1159 AND Ins2 <= 0 AND Fcrls <= 0 AND Tmem119 > 0 AND Hexb <= 1	Fat
Rule1065	Ptprcap > 8 AND P2ry12 <= 3 AND Cd3g <= 1 AND Chga <= 1 AND Krt13 <= 0 AND Ttr <= 0 AND Gc <= 0 AND Cd79b > 377 AND Ptprc <= 1640 AND Laptm5 <= 1159 AND Ins2 <= 0 AND Fcrls <= 0 AND C1qb <= 0 AND Krt14 <= 0 AND Ptprc > 1 AND Pcsk1n <= 0 AND Cd3d > 2	Spleen
Rule1066	Ptprcap > 8 AND P2ry12 <= 3 AND Cd3g <= 1 AND Chga <= 1 AND Krt13 <= 0 AND Ttr <= 0 AND Gc <= 0 AND Cd79b > 377 AND Ptprc > 1704 AND Ins2 <= 2 AND Ptprcap > 535	Fat
Rule1067	Ptprcap > 8 AND P2ry12 <= 3 AND Cd3g <= 1 AND Chga <= 1 AND Krt13 <= 0 AND Lpcat2 > 3 AND Epcam <= 70 AND Gpr34 <= 70 AND Trem2 <= 0 AND Tcf7 <= 0 AND C1qc <= 1 AND Ttr <= 0 AND P2ry13 <= 0 AND Krt19 <= 0 AND Krt15 <= 0 AND C1qb <= 0 AND Cd79b <= 1208 AND Laptm5 > 88	Spleen
Rule1068	Ptprcap > 8 AND P2ry12 <= 3 AND Cd3g <= 1 AND Lpcat2 > 3 AND Csf1r <= 4 AND Prss2 <= 0 AND Csf1r <= 1 AND Fcrls <= 0 AND Krt13 <= 0 AND Tcf7 <= 10 AND C1qc <= 1 AND Rac2 > 432	Marrow
Rule1069	Ptprcap > 8 AND P2ry12 <= 3 AND Lpcat2 > 5 AND Col17a1 <= 0 AND Myb <= 21 AND Cd8a <= 0 AND Krt8 <= 0 AND Dmkn <= 0 AND Coro1a > 245 AND Epcam <= 95 AND Krt15 <= 0 AND Ctsd <= 718 AND P2ry12 <= 0 AND Cd79b <= 244 AND Ins2 <= 0 AND Trem2 <= 0	Fat
Rule1070	Ptprcap > 8 AND P2ry12 <= 3 AND Lpcat2 > 5 AND Col17a1 <= 0 AND Myb <= 21 AND Cd8a <= 0 AND Dmkn <= 0 AND Krt8 <= 0 AND Krt15 <= 0 AND Hexb <= 80 AND P2ry13 <= 0 AND Tmem119 <= 0 AND Ptprcap > 33	Lung
Rule1071	Ptprcap > 8 AND P2ry12 <= 3 AND Cd3g <= 1 AND Lpcat2 > 5 AND Krt14 <= 0 AND Cd79b > 283 AND Sfn > 0	Spleen
Rule1072	Ptprcap > 8 AND P2ry12 <= 3 AND Cd3g <= 1 AND Lpcat2 > 5 AND Cd3d <= 0 AND Ttr <= 0 AND Lgmn > 4	Fat
Rule1073	Ptprcap > 8 AND P2ry12 <= 3 AND Cd3g <= 1 AND Lpcat2 > 5	Heart
Rule1074	Ptprcap > 8 AND P2ry12 <= 3 AND Cd3g <= 1 AND Slc2a5 > 0 AND Cldn3 <= 0 AND Sfn <= 0	Fat
Rule1075	Ptprcap > 8 AND P2ry12 <= 3 AND Cd3g <= 1 AND Slc2a5 > 0 AND Trem2 <= 0 AND Hexb > 2	Muscle
Rule1076	Ptprcap > 8 AND P2ry12 <= 3 AND Cd3g <= 1 AND Mobp > 0 AND Hexb <= 1 AND Krt8 <= 0	Marrow
Rule1077	Ptprcap > 8 AND P2ry12 <= 3 AND Cd3g <= 1 AND Krt13 <= 0 AND Perp > 1 AND Lgals4 <= 5	Spleen
Rule1078	Ptprcap > 8 AND P2ry12 <= 3 AND Cd3g <= 1 AND Perp <= 0 AND Ttr <= 0 AND Gc <= 0 AND Krt5 <= 0 AND Krt14 <= 0 AND Cd79b > 539 AND Cldn7 <= 0 AND Csf1r <= 2 AND Resp18 <= 0 AND Ptprc > 1640 AND Hexb <= 93	Lung
Rule1079	Ptprcap > 8 AND P2ry12 <= 3 AND Cd3g <= 1 AND Krt13 <= 0 AND Chga <= 1 AND Trem2 > 0 AND Slc2a5 <= 0 AND Cdhr5 <= 0 AND Csf1r <= 37 AND P2ry12 <= 0	Spleen
Rule1080	Ptprcap > 8 AND P2ry12 <= 3 AND Cd3g <= 1 AND Trem2 > 0 AND Lgals7 <= 0 AND Slc2a5 <= 0 AND Cdhr5 <= 0 AND Ctsd > 186	Marrow
Rule1081	Ptprcap > 8 AND P2ry12 <= 3 AND Cd3g <= 1 AND Trem2 > 0 AND Lgals7 <= 0 AND P2ry12 > 0	Fat
Rule1082	Ptprcap > 8 AND P2ry12 <= 3 AND Cd3g <= 1 AND Trem2 > 0 AND P2ry12 <= 0 AND Hexb <= 35	Heart
Rule1083	Ptprcap > 8 AND P2ry12 <= 3 AND Cd3g <= 1 AND Krt13 <= 0 AND Asb5 > 0 AND Hexb <= 0	Brain Neurons
Rule1084	Ptprcap > 8 AND P2ry12 <= 3 AND Cd3g <= 1 AND Krt13 <= 0 AND C1qa <= 0 AND Csf1r <= 1 AND Cd79b > 377 AND Ptprc > 1640	Muscle
Rule1085	Ptprcap > 8 AND P2ry12 <= 3 AND Cd3g <= 1 AND Krt13 <= 0 AND Ttr <= 0 AND Gc <= 0 AND Krt5 > 0 AND Dmkn <= 0 AND C1qa <= 0 AND C1qc <= 1 AND Laptm5 <= 204	Marrow
Rule1086	Ptprcap > 8 AND P2ry12 <= 3 AND Cd3g <= 1 AND Krt13 <= 0 AND Ttr <= 0 AND Gc <= 0 AND Krt5 <= 0 AND Cd79b > 377 AND Dmkn <= 0 AND Krt14 > 0 AND Ptprc > 356	Fat
Rule1087	Ptprcap > 8 AND P2ry12 <= 3 AND Cd3g <= 1 AND Krt13 <= 0 AND Ttr <= 0 AND Gc <= 0 AND Krt5 <= 0 AND Cd79b > 377 AND Dmkn <= 0 AND Krt14 > 0 AND Mbp > 3 AND Ptprcap > 277	Thymus
Rule1088	Ptprcap > 8 AND P2ry12 <= 3 AND Cd3g <= 1 AND Krt13 <= 0 AND Csf1r <= 1 AND Ttr <= 0 AND Gc <= 0 AND Krt5 <= 0 AND Cd79b > 377 AND Dmkn <= 0 AND Coro1a > 0 AND Ins2 <= 0 AND Fcrls <= 0 AND Krt19 <= 0 AND Lpcat2 > 0	Spleen
Rule1089	Ptprcap > 8 AND P2ry12 <= 3 AND Cd3g <= 1 AND Krt13 <= 0 AND Csf1r <= 1 AND Ttr <= 0 AND Gc <= 0 AND Krt5 <= 0 AND Cd79b > 377 AND Dmkn <= 0 AND Coro1a > 0 AND Ins2 <= 0 AND Fcrls <= 0 AND Krt19 <= 0 AND P2ry13 > 0 AND Ptprcap <= 339	Spleen
Rule1090	Ptprcap > 8 AND P2ry12 <= 3 AND Cd3g <= 1 AND Krt13 <= 0 AND Csf1r <= 1 AND Ttr <= 0 AND Gc <= 0 AND Krt5 <= 0 AND Cd79b > 377 AND Dmkn <= 0 AND Coro1a > 0 AND Ins2 <= 0 AND Fcrls <= 0 AND P2ry13 <= 0 AND Krt19 > 0	Spleen
Rule1091	Ptprcap > 8 AND P2ry12 <= 3 AND Cd3g <= 1 AND Krt13 <= 0 AND Csf1r <= 1 AND Ttr <= 0 AND Gc <= 0 AND Dmbt1 > 0 AND Krt8 <= 0 AND Ptprc > 50	Muscle
Rule1092	Ptprcap > 8 AND P2ry12 <= 3 AND Cd3g <= 1 AND Krt13 <= 0 AND Csf1r <= 1 AND Ttr <= 0 AND Gc <= 0 AND Krt5 <= 0 AND Cd79b > 374 AND Coro1a > 0 AND Ins2 <= 0 AND Fcrls <= 0 AND P2ry13 <= 0 AND C1qb > 0 AND Mbp <= 1 AND Ptprc <= 182	Spleen
Rule1093	Ptprcap > 8 AND P2ry12 <= 3 AND Cd3g <= 1 AND Krt13 <= 0 AND Csf1r <= 1 AND Ttr <= 0 AND Gc <= 0 AND Krt5 <= 0 AND Cd79b > 374 AND Coro1a > 0 AND Ins2 <= 0 AND Fcrls <= 0 AND P2ry13 <= 0 AND C1qb <= 0 AND Krt15 <= 0 AND P2ry12 <= 0 AND Ptprcap > 1547 AND Ptprc > 111	Marrow
Rule1094	Ptprcap > 8 AND P2ry12 <= 3 AND Cd3g <= 1 AND Krt13 <= 0 AND Csf1r <= 1 AND Ttr <= 0 AND Gc <= 0 AND Krt5 <= 0 AND Cd79b > 374 AND Coro1a > 0 AND Ins2 <= 0 AND Fcrls <= 0 AND P2ry13 <= 0 AND C1qb > 0	Marrow
Rule1095	Ptprcap > 8 AND P2ry12 <= 3 AND Cd3g <= 1 AND Krt13 <= 0 AND Csf1r <= 1 AND Ttr <= 0 AND Gc <= 0 AND Krt5 <= 0 AND Cd79b > 374 AND Coro1a > 0 AND Ins2 <= 0 AND Fcrls <= 0 AND P2ry13 <= 0 AND Ptprcap <= 1404 AND Krt15 <= 0 AND P2ry12 <= 0 AND Laptm5 > 1255 AND Coro1a > 1137	Marrow
Rule1096	Ptprcap > 8 AND P2ry12 <= 3 AND Cd3g <= 1 AND Krt13 <= 0 AND Csf1r <= 1 AND Ttr <= 0 AND Gc <= 0 AND Krt5 <= 0 AND Phgr1 > 0 AND 2210415F13Rik <= 0	Marrow
Rule1097	Ptprcap > 8 AND P2ry12 <= 3 AND Cd3g <= 1 AND Krt13 <= 0 AND Csf1r <= 1 AND Ttr <= 0 AND Gc <= 0 AND Krt5 <= 0 AND Cd79b > 374 AND Coro1a > 0 AND Laptm5 <= 1159 AND Cldn7 <= 0 AND P2ry13 > 0 AND Hexb <= 0	Fat
Rule1098	Ptprcap > 8 AND P2ry12 <= 3 AND Cd3g <= 1 AND Krt13 <= 0 AND Csf1r <= 1 AND Ttr <= 0 AND C1qa <= 0 AND P2ry13 > 0 AND Fcrls <= 0 AND C1qc <= 0 AND Rac2 > 187	Marrow
Rule1099	Ptprcap > 8 AND P2ry12 <= 3 AND Cd3g <= 1 AND Krt13 <= 0 AND Csf1r <= 1 AND Ttr <= 0 AND C1qa <= 0 AND P2ry13 > 0 AND Fcrls <= 0 AND Rac2 <= 178	Brain Neurons
Rule1100	Ptprcap > 8 AND P2ry12 <= 3 AND Cd3g <= 1 AND Krt13 <= 0 AND Csf1r <= 1 AND Ttr <= 0 AND C1qa <= 0 AND Cd79b > 374 AND Gc <= 0 AND C1qb <= 0 AND Cldn7 <= 0 AND Fcrls <= 0 AND Siglech <= 0 AND Laptm5 > 1159 AND Mbp <= 0 AND Krt15 <= 0 AND Laptm5 > 1263	Fat
Rule1101	Ptprcap > 8 AND P2ry12 <= 3 AND Cd3g <= 1 AND Krt13 <= 0 AND Csf1r <= 1 AND Ttr <= 0 AND C1qa <= 0 AND Cd79b > 374 AND Gc <= 0 AND C1qb <= 0 AND Cldn7 <= 0 AND Fcrls <= 0 AND Siglech <= 0 AND Ins2 <= 0 AND Ptprcap <= 1404 AND Ptprc > 1 AND Krt15 <= 0 AND P2ry12 <= 0 AND Ctsd <= 0 AND Pigr <= 0 AND Epcam <= 21 AND Cd79b > 669 AND Capns2 <= 78 AND 2210415F13Rik > 0 AND Mbp <= 0	Spleen
Rule1102	Ptprcap > 8 AND P2ry12 <= 3 AND Cd3g <= 1 AND Krt13 <= 0 AND Csf1r <= 1 AND Ttr <= 0 AND C1qa <= 0 AND Cd79b > 374 AND Gc <= 0 AND Cldn7 <= 0 AND C1qb <= 0 AND Fcrls <= 0 AND Siglech <= 0 AND Ins2 <= 0 AND Ptprcap <= 1404 AND Ptprc <= 1 AND Rac2 <= 571 AND Mbp <= 8 AND Laptm5 > 8	Marrow
Rule1103	Ptprcap > 8 AND P2ry12 <= 3 AND Cd3g <= 1 AND Krt13 <= 0 AND Csf1r <= 1 AND Ttr <= 0 AND C1qa <= 0 AND Cd79b > 374 AND Cldn7 <= 0 AND Gc <= 0 AND C1qb <= 0 AND Fcrls <= 0 AND Siglech <= 0 AND Ins2 <= 0 AND Ptprc <= 1 AND Rac2 > 571	Muscle
Rule1104	Ptprcap > 8 AND P2ry12 <= 3 AND Cd3g <= 1 AND Krt13 <= 0 AND Csf1r <= 1 AND Cd79b > 374 AND Ttr <= 1 AND C1qc > 0 AND Csf1r <= 0 AND Ttr > 0	Marrow
Rule1105	Ptprcap > 8 AND P2ry12 <= 3 AND Cd3g <= 1 AND Krt13 <= 0 AND Csf1r <= 1 AND Ttr <= 0 AND C1qa <= 0 AND Cd79b > 374 AND Cldn7 <= 0 AND Gc <= 0 AND Resp18 <= 0 AND Fcrls <= 0 AND C1qb <= 0 AND Siglech > 0	Spleen
Rule1106	Ptprcap > 8 AND P2ry12 <= 3 AND Cd3g <= 1 AND Krt13 <= 0 AND Csf1r <= 1 AND Ttr <= 0 AND C1qa <= 0 AND Cd79b > 374 AND Cldn7 <= 0 AND Gc <= 0 AND Coro1a > 0 AND Fcrls <= 0 AND C1qb <= 0 AND Ins2 <= 2 AND Rac2 > 145 AND Ctsd <= 43 AND Chga <= 0 AND Ins2 <= 0 AND Rac2 <= 149	Lung
Rule1107	Ptprcap > 8 AND P2ry12 <= 3 AND Cd3g <= 1 AND Krt13 <= 0 AND Csf1r <= 1 AND Ttr <= 0 AND Gc <= 0 AND Siglech > 0 AND Ins2 <= 0	Fat
Rule1108	Ptprcap > 8 AND P2ry12 <= 3 AND Cd3g <= 1 AND Krt13 <= 0 AND Csf1r <= 1 AND Ttr <= 0 AND Gc <= 0 AND Krt5 > 0 AND Sfn <= 0 AND Cd79b <= 1 AND Ptprc <= 349	Kidney
Rule1109	Ptprcap > 8 AND P2ry12 <= 3 AND Cd3g <= 1 AND Krt13 <= 0 AND Csf1r <= 1 AND Ttr <= 0 AND Gc <= 0 AND Cd79b > 374 AND Cldn7 <= 0 AND Coro1a > 0 AND Ins2 <= 1 AND Fcrls <= 0 AND Ins2 <= 0 AND Hexb > 1092 AND Ptprcap <= 1498	Marrow
Rule1110	Ptprcap > 8 AND P2ry12 <= 3 AND Cd3g <= 1 AND Krt13 <= 0 AND Csf1r <= 1 AND Ttr <= 0 AND Gc <= 0 AND Cd79b > 374 AND Cldn7 <= 0 AND Coro1a > 0 AND Hexb <= 1019 AND Ins2 <= 1 AND Fcrls <= 0 AND Ins2 <= 0 AND Krt15 <= 0 AND P2ry12 <= 0 AND Ctsd <= 0 AND Pigr <= 0 AND Epcam > 21	Marrow
Rule1111	Ptprcap > 8 AND Crybb1 > 1 AND Ccr9 <= 14 AND Cd3e <= 221 AND Krt5 <= 0 AND Csf1r > 1	Liver
Rule1112	Ptprcap > 8 AND Cd3g <= 1 AND Pnlip > 0 AND P2ry12 <= 2	Fat
Rule1113	Ptprcap > 8 AND Cd3g <= 1 AND P2ry12 > 3 AND Myb <= 2 AND Cx3cr1 <= 1	Heart
Rule1114	Ptprcap > 8 AND Cd3g <= 1 AND Slc2a5 > 2 AND Lgmn > 27	Lung
Rule1115	Ptprcap > 8 AND Cd3g <= 1 AND Krt13 <= 0 AND Lpcat2 > 1 AND Myb <= 2 AND Fcrls > 4	Fat
Rule1116	Ptprcap > 8 AND Cd3g <= 1 AND C1qc > 5	Marrow
Rule1117	Ptprcap > 8 AND Cd3g <= 1 AND Trem2 > 0 AND Lgals7 <= 0	Kidney
Rule1118	Ptprcap > 8 AND Cd3g <= 1 AND Krt6a > 1 AND P2ry12 <= 0	Marrow
Rule1119	Ptprcap > 8 AND Cd3g <= 1 AND Perp <= 0 AND Csf1r <= 1 AND Ttr <= 0 AND Gc <= 0 AND Krt13 <= 0 AND Cd79b > 374 AND Cldn7 <= 0 AND Coro1a > 0 AND Ins2 <= 1 AND Fcrls <= 0 AND Hexb <= 1019 AND Ins2 <= 0 AND Krt15 <= 0 AND P2ry12 <= 0 AND Ptprcap > 106 AND Ctsd <= 178 AND Phgr1 <= 0 AND Capns2 <= 78 AND 2210415F13Rik > 0 AND Laptm5 <= 443	Marrow
Rule1120	Ptprcap > 8 AND Cd3g <= 1 AND Perp <= 0 AND Csf1r <= 1 AND Ttr <= 0 AND Krt13 <= 0 AND Gc <= 0 AND Cd79b > 374 AND Cldn7 <= 0 AND Coro1a > 0 AND Col17a1 <= 0 AND Ins2 <= 1 AND Fcrls <= 0 AND Hexb <= 1019 AND Ins2 <= 0 AND Rac2 > 145 AND Ctsd <= 176 AND Phgr1 <= 0 AND Capns2 <= 78 AND Krt15 > 0 AND Hpgds <= 89	Spleen
Rule1121	Ptprcap > 8 AND Cd3g <= 1 AND Perp <= 0 AND Csf1r <= 1 AND Ttr <= 0 AND Krt13 > 0 AND C1qb <= 0 AND Cldn3 <= 0 AND Krt15 <= 0 AND Krt5 <= 0	Marrow
Rule1122	Ptprcap > 8 AND Cd3g <= 1 AND Krt13 <= 0 AND Csf1r <= 1 AND Ttr <= 0 AND Gc <= 0 AND Cd79b > 374 AND Cldn7 <= 0 AND Coro1a > 0 AND Col17a1 <= 0 AND Ins2 <= 1 AND Fcrls <= 0 AND Hexb <= 1019 AND Ins2 <= 0 AND Tspan1 <= 0 AND Krt15 <= 0 AND P2ry12 <= 0 AND 2210415F13Rik > 0	Spleen
Rule1123	Ptprcap > 8 AND Cd3g <= 1 AND Krt13 <= 0 AND Csf1r <= 1 AND Ttr <= 0 AND Gc <= 0 AND Cd79b > 374 AND Cldn7 <= 0 AND 2210415F13Rik <= 0 AND Coro1a > 0 AND Col17a1 > 0	Spleen
Rule1124	Ptprcap > 8 AND Cd3g <= 1 AND Krt13 <= 0 AND Csf1r <= 1 AND Ttr <= 0 AND Gc <= 0 AND Cd79b > 374 AND Cldn7 <= 0 AND 2210415F13Rik <= 0 AND Coro1a > 0 AND Ins2 <= 1 AND Fcrls <= 0 AND Hexb <= 1019 AND Ins2 <= 0 AND Ctsd > 181 AND Hexb <= 75	Marrow
Rule1125	Ptprcap > 8 AND Cd3g <= 1 AND Krt13 <= 0 AND Csf1r <= 1 AND Ttr <= 0 AND Gc <= 0 AND Cd79b > 374 AND Cldn7 <= 0 AND 2210415F13Rik <= 0 AND Coro1a > 0 AND Ins2 <= 1 AND Fcrls <= 0 AND Hexb <= 1019 AND Ins2 <= 0 AND Ctsd <= 181 AND Krt15 <= 0 AND P2ry12 <= 0 AND Rac2 > 147 AND Coro1a <= 265 AND Epcam <= 0 AND Rac2 <= 513	Marrow
Rule1126	Ptprcap > 8 AND Cd3g <= 1 AND Krt13 <= 0 AND Csf1r <= 1 AND Ttr <= 0 AND Gc <= 0 AND Cd79b > 374 AND Cldn7 <= 0 AND 2210415F13Rik <= 0 AND C1qb <= 0 AND Fcrls <= 0 AND Ins2 <= 0 AND Ctsd <= 181 AND Hexb <= 1145 AND Krt15 <= 0 AND P2ry12 <= 0 AND Rac2 > 147 AND Coro1a > 296 AND Cd79b > 669 AND Ctsd > 0 AND Ctsd <= 59 AND Pigr <= 0 AND Krt14 <= 0 AND Tcf7 <= 1 AND Epcam <= 0 AND Lgals4 <= 5 AND Cts…	Spleen
Rule1127	Ptprcap > 8 AND Cd3g <= 1 AND Krt13 <= 0 AND Csf1r <= 1 AND Ttr <= 0 AND Gc <= 0 AND Cd79b > 374 AND Cldn7 <= 0 AND 2210415F13Rik <= 0 AND C1qb > 0 AND Hexb <= 203 AND Csf1r <= 0 AND Ctsd > 0 AND Ptprcap <= 436	Spleen
Rule1128	Ptprcap > 8 AND Cd3g <= 1 AND Krt13 <= 0 AND Csf1r <= 1 AND Ttr <= 0 AND Gc <= 0 AND Cd79b > 374 AND Cldn7 <= 0 AND C1qb > 0 AND Hexb <= 203 AND Fcrls <= 0	Muscle
Rule1129	Ptprcap > 8 AND Cd3g <= 1 AND Krt13 <= 0 AND Csf1r <= 1 AND Ttr <= 0 AND Gc <= 0 AND Cd79b > 374 AND Cldn7 <= 0 AND C1qb > 0 AND Fcrls <= 0	Fat
Rule1130	Ptprcap > 8 AND Cd3g <= 1 AND Krt13 <= 0 AND Csf1r <= 1 AND Cd79b > 374 AND C1qc > 0 AND Fcrls <= 0 AND Krt15 <= 1	Kidney
Rule1131	Ptprcap > 8 AND Cd3g <= 1 AND Krt13 <= 0 AND Cd79b > 374 AND Cldn7 <= 0 AND Fxyd3 <= 0 AND Ttr <= 3 AND B4galnt2 <= 12 AND 2210415F13Rik <= 0 AND Hpgds <= 163 AND Gc <= 1 AND Fcrls <= 0 AND Ins2 <= 0 AND Hexb <= 1145 AND Ctsd <= 181 AND Rac2 > 185 AND Gpr34 <= 0 AND Cx3cr1 <= 0 AND Csf1r <= 0 AND Coro1a > 290 AND Capns2 <= 78 AND B4galnt2 <= 1 AND Tcf7 <= 1 AND Ttr <= 0 AND P2ry12 <= 0 AND Cd79b …	Spleen
Rule1132	Ptprcap > 8 AND Cd3g <= 1 AND Krt13 <= 0 AND Csf1r <= 1 AND Cd79b > 374 AND Cldn7 <= 0 AND Ttr <= 1 AND Gc <= 1 AND 2210415F13Rik <= 0 AND Hpgds <= 163 AND Fcrls <= 0 AND Ins2 <= 0 AND Hexb <= 1145 AND Ctsd <= 181 AND Coro1a <= 296 AND Ctsd <= 0 AND Rac2 > 111	Spleen
Rule1133	Ptprcap > 8 AND Cd3g <= 1 AND Krt13 <= 0 AND Cd79b > 374 AND Cldn7 <= 0 AND Fxyd3 <= 0 AND Ttr <= 3 AND B4galnt2 <= 12 AND 2210415F13Rik > 0	Marrow
Rule1134	Ptprcap > 8 AND Cd3g <= 1 AND Krt13 <= 0 AND Csf1r <= 1 AND Cd79b > 374 AND Cldn7 <= 0 AND Hpgds <= 120 AND Ttr > 1	Liver
Rule1135	Ptprcap > 8 AND Cd3g <= 1 AND Krt13 <= 0 AND Csf1r <= 1 AND Cd79b > 374 AND Cldn7 <= 0 AND Gc <= 1 AND Hpgds <= 120 AND Coro1a > 319 AND B4galnt2 <= 12 AND Ins2 <= 1 AND Perp <= 0 AND Hexb <= 1145 AND Csf1r <= 0 AND Ins2 <= 0 AND Ctsd <= 181 AND Rac2 > 185 AND Capns2 <= 78 AND Fcrls <= 0 AND Gpr34 <= 0 AND B4galnt2 <= 1 AND Tcf7 <= 1 AND Epcam > 0 AND Krt8 <= 0 AND Coro1a <= 1121	Spleen
Rule1136	Ptprcap > 8 AND Cd3g <= 1 AND Krt13 <= 0 AND Csf1r <= 1 AND Cd79b > 374 AND Cldn7 <= 0 AND Gc <= 1 AND Hpgds <= 120 AND Coro1a > 319 AND B4galnt2 <= 12 AND Ins2 <= 1 AND Perp <= 0 AND Hexb <= 1145 AND Ins2 <= 0 AND Ctsd <= 181 AND Fcrls <= 0 AND Rac2 > 185 AND Gpr34 <= 0 AND Capns2 <= 78 AND C1qa <= 0 AND B4galnt2 <= 1 AND Tcf7 <= 1 AND Cd79b > 791 AND P2ry12 <= 0 AND Ctsd <= 31 AND Hpgds <= 0 AN…	Spleen
Rule1137	Ptprcap > 8 AND Cd3g <= 1 AND Krt13 <= 0 AND Csf1r <= 1 AND Hexb > 481 AND Lgmn <= 3 AND Rac2 <= 3399	Marrow
Rule1138	Ptprcap > 8 AND Cd3g <= 1 AND Krt13 <= 0 AND Hexb > 481 AND Krt14 <= 0	Lung
Rule1139	Ptprcap > 8 AND Cd3g <= 1 AND Krt13 <= 0 AND Csf1r <= 1 AND Cd79b > 374 AND Cldn7 <= 0 AND Hpgds <= 120 AND Coro1a > 319 AND Gc <= 1 AND Ins2 <= 0 AND Fcrls <= 0 AND Csf1r <= 0 AND Rac2 > 355 AND Capns2 <= 78 AND B4galnt2 <= 1 AND Hexb <= 21 AND Hpgds <= 0 AND Cd79b <= 761	Spleen
Rule1140	Ptprcap > 8 AND Cd3g <= 1 AND Krt13 <= 0 AND Csf1r <= 1 AND Ttr <= 0 AND Krt17 > 1 AND Krt8 <= 0	Spleen
Rule1141	Ptprcap > 8 AND Cd3g <= 1 AND Krt13 <= 0 AND Csf1r <= 1 AND Ttr <= 0 AND Cd79b > 378 AND Cldn7 <= 0 AND Gc > 0 AND Siglech <= 0	Liver
Rule1142	Ptprcap > 8 AND Cd3g <= 1 AND Krt13 <= 0 AND Csf1r <= 1 AND Ttr <= 0 AND Cd79b > 378 AND Cldn7 <= 0 AND Coro1a > 311 AND Ins2 <= 2 AND Cx3cr1 <= 0 AND Chga <= 0 AND Fcrls <= 0 AND Epcam > 18	Spleen
Rule1143	Ptprcap > 8 AND Cd3g <= 1 AND Krt13 <= 0 AND Csf1r <= 1 AND Ttr <= 0 AND Cd79b > 378 AND Cldn7 <= 0 AND Coro1a > 311 AND Epcam <= 49 AND Ins2 <= 3 AND Cx3cr1 <= 0 AND Chga > 0	Marrow
Rule1144	Ptprcap > 8 AND Cd3g <= 1 AND Krt6a > 0 AND Coro1a > 742	Lung
Rule1145	Ptprcap > 8 AND Cd3g <= 1 AND Krt13 > 0 AND Krt5 <= 2 AND Ctsd <= 196 AND Coro1a <= 4591	Fat
Rule1146	Ptprcap > 8 AND Cd3g <= 1 AND Krt13 > 0 AND Anxa8 <= 0 AND Krt14 > 1	Thymus
Rule1147	Ptprcap > 8 AND Cd3g <= 1 AND Csf1r <= 1 AND Ttr <= 0 AND Cd79b > 378 AND Cldn7 <= 0 AND Fcrls > 0 AND C1qc <= 0 AND Sfn <= 20	Fat
Rule1148	Ptprcap > 8 AND Cd3g <= 1 AND Csf1r <= 1 AND Cd79b > 525 AND 1190003J15Rik <= 0 AND Cldn7 <= 0 AND B4galnt2 <= 8 AND Lpcat2 <= 0 AND Fcrls <= 0 AND Ins2 <= 3 AND Ins2 > 0 AND Ins2 <= 2 AND Hexb <= 6	Spleen
Rule1149	Ptprcap > 8 AND Cd3g <= 1 AND Csf1r <= 1 AND Ttr <= 0 AND Cd79b > 537 AND Cldn7 <= 0 AND Fcrls <= 0 AND Ctsd <= 181 AND Rac2 <= 150 AND Ptprc <= 512 AND Sfn <= 0 AND Ctsd <= 19 AND Chga <= 0 AND Ptprcap <= 391	Liver
Rule1150	Ptprcap > 8 AND Cd3g <= 1 AND Csf1r <= 1 AND Ttr <= 0 AND Cd79b > 758 AND Ctsd <= 176 AND Hpgds <= 54 AND C1qc <= 0 AND Rac2 <= 2838 AND Chga <= 0 AND Hexb <= 172 AND Rac2 > 139 AND P2ry12 <= 0 AND Pigr <= 0 AND Laptm5 <= 796 AND Hpgds <= 0 AND Lgals4 <= 21 AND Lgals4 <= 0 AND Cd79b > 1003 AND Epcam <= 0 AND Ctsd > 7	Marrow
Rule1151	Ptprcap > 8 AND Cd3g <= 1 AND Csf1r <= 1 AND Ttr <= 0 AND Mbp <= 5 AND Klk1 <= 1 AND Cd3d <= 0 AND Anxa8 > 0 AND Ins2 <= 3	Spleen
Rule1152	Ptprcap > 8 AND Cd3g <= 1 AND Csf1r <= 1 AND Ttr <= 0 AND Krt13 > 0	Kidney
Rule1153	Ptprcap > 8 AND Cd3g <= 1 AND Csf1r <= 1 AND Anxa8 > 0 AND 2210415F13Rik <= 0	Marrow
Rule1154	Ptprcap > 8 AND Cd3g <= 1 AND Csf1r <= 1 AND Ttr <= 0 AND Cd79b > 758 AND Krt15 <= 0 AND Rac2 > 2838 AND Krt14 <= 0	Muscle
Rule1155	Ptprcap > 8 AND Cd3g <= 1 AND Csf1r <= 1 AND Ttr <= 0 AND Cd79b > 758 AND Krt15 <= 0 AND Chga <= 0 AND Ctsd <= 1 AND Tmem119 <= 0 AND Ins2 <= 4 AND P2ry12 <= 0 AND Ins2 <= 1 AND Lgals4 <= 1 AND Lgals4 <= 0 AND Epcam <= 0 AND Ptprc > 327 AND Krt8 <= 0 AND Mbp > 0	Marrow
Rule1156	Ptprcap > 8 AND Cd3g <= 1 AND Csf1r <= 1 AND Ttr <= 0 AND Cd79b > 758 AND Krt15 <= 0 AND Chga <= 0 AND Ctsd <= 8 AND Tmem119 <= 0 AND P2ry12 <= 0 AND Lgals4 <= 1 AND Hpgds <= 0 AND Lgals4 <= 0 AND Epcam <= 0 AND Mbp <= 41 AND Krt8 <= 0 AND Pigr <= 0 AND Laptm5 <= 718 AND Mbp <= 1	Marrow
Rule1157	Ptprcap > 8 AND Cd3g <= 1 AND Csf1r <= 1 AND Ttr <= 0 AND Mbp <= 5 AND Cd3d > 0 AND Ins2 <= 0	Spleen
Rule1158	Ptprcap > 8 AND Cd3g <= 1 AND Csf1r <= 1 AND Ttr <= 0 AND Mbp <= 5 AND Krt17 <= 0 AND Mobp <= 4 AND Cd3d <= 3 AND Klk1 <= 1 AND Pitx1 <= 0 AND 1190003J15Rik <= 0 AND Pigr > 0	Spleen
Rule1159	Cd3e > 1 AND Myo1a > 0 AND Cdhr5 <= 1	Trachea
Rule1160	Cd3e > 1 AND Cldn3 > 7 AND Serpinb5 <= 2 AND Cdx1 > 1	Colon
Rule1161	Cd3e > 1 AND Fosl1 > 5 AND Ccr9 > 11	Trachea
Rule1162	Cd3e > 1 AND Ccr9 > 1 AND Ptprcap <= 31 AND Hpgds <= 2 AND Fcrls <= 8 AND Cd8b1 > 1 AND Cldn3 <= 1 AND Lgals7 <= 13 AND Aqp3 <= 48 AND Chodl <= 0 AND Scgn <= 0 AND Cldn3 <= 0 AND Krt19 <= 1 AND Prss32 <= 0 AND Tmem27 <= 0 AND Cd8b1 > 244	Thymus
Rule1163	Ptprcap > 8 AND Cd3g <= 1 AND Csf1r <= 1 AND Ttr <= 0 AND Mbp > 5 AND Cx3cr1 <= 1 AND Ptprc <= 77 AND Krt15 <= 0 AND Laptm5 <= 188	Kidney
Rule1164	Ptprcap > 8 AND Cd3g <= 1 AND Ttr <= 0 AND Csf1r <= 1 AND Klk1 > 0 AND Krt15 <= 0	Fat
Rule1165	Ptprcap > 8 AND Cd3g <= 1 AND Ttr <= 0 AND Csf1r <= 1 AND Cd79b > 758 AND Krt15 <= 0 AND Ctsd <= 176 AND Chga <= 0 AND Ctsd > 1 AND Epcam <= 0 AND Coro1a > 570 AND Coro1a <= 1534	Spleen
Rule1166	Ptprcap > 8 AND Cd3g <= 1 AND Ttr <= 0 AND Csf1r <= 1 AND Hpgds > 4 AND Krt15 <= 0 AND Lgals4 <= 1	Spleen
Rule1167	Ptprcap > 8 AND Cd3g <= 1 AND Hpgds > 5 AND C1qc <= 0 AND Lgmn <= 4	Marrow
Rule1168	Ptprcap > 8 AND Cd3g <= 1 AND Hpgds > 5 AND C1qc <= 0	Lung
Rule1169	Ptprcap > 8 AND Cd3g <= 1 AND Ttr <= 0 AND Hpgds <= 1 AND Gc > 0 AND Hexb <= 0 AND Ptprc <= 5	Lung
Rule1170	Ptprcap > 8 AND Cd3g <= 1 AND Ttr <= 0 AND Hpgds <= 1 AND Ins2 <= 0 AND Mobp <= 4 AND Trim29 <= 0 AND Clps <= 0 AND Cx3cr1 <= 4 AND Dmbt1 <= 0 AND 1190003J15Rik <= 0 AND Pitx1 > 0	Muscle
Rule1171	Ptprcap > 8 AND Cd3g <= 1 AND Hpgds > 1 AND Krt14 <= 0	Fat
Rule1172	Ptprcap > 8 AND Cd3g <= 1 AND Ttr <= 0 AND C1qc > 1 AND Fcrls <= 0	Muscle
Rule1173	Ptprcap > 8 AND Cd3g <= 1 AND Ttr <= 0 AND Csf1r <= 2 AND Ins2 <= 0 AND Mobp <= 4 AND Trim29 <= 0 AND Clps <= 0 AND Dmbt1 <= 0 AND 1190003J15Rik <= 0 AND Cd79b <= 380 AND Tspan8 <= 0 AND Ctsd > 77 AND Krt5 > 0	Muscle
Rule1174	Ptprcap > 8 AND Cd3g <= 1 AND Ttr <= 0 AND Csf1r <= 2 AND Ctsd > 78 AND Mobp <= 4 AND Lgmn > 185	Liver
Rule1175	Ptprcap > 8 AND Cd3g <= 1 AND Ttr <= 0 AND Csf1r <= 2 AND Ctsd > 70 AND Mobp <= 4 AND Cd3d > 0	Marrow
Rule1176	Ptprcap > 8 AND Cd3g <= 1 AND Ttr <= 0 AND Csf1r <= 2 AND Ctsd > 70 AND Mobp <= 4 AND Fcrls <= 0 AND Crybb1 <= 2 AND P2ry12 > 0 AND Cx3cr1 <= 1	Heart
Rule1177	Ptprcap > 8 AND Cd3g <= 1 AND Ttr <= 0 AND Csf1r <= 2 AND Krt17 <= 0 AND Ctsd > 70 AND Mobp <= 4 AND Fcrls <= 0 AND Crybb1 <= 2 AND Siglech <= 0 AND Dmbt1 <= 0 AND B4galnt2 <= 0 AND C1qa <= 0 AND Gc <= 0 AND Gpx2 <= 0 AND P2ry12 <= 0 AND Lgals4 <= 0 AND Csf1r <= 0 AND Hexb > 141 AND Mbp <= 65	Fat
Rule1178	Ptprcap > 8 AND Cd3g <= 1 AND Ttr <= 0 AND Csf1r <= 2 AND Krt17 <= 0 AND Ctsd > 70 AND Mobp <= 4 AND Fcrls <= 0 AND Crybb1 <= 2 AND Siglech <= 0 AND Dmbt1 <= 0 AND B4galnt2 <= 0 AND C1qa <= 0 AND Gc <= 0 AND Gpx2 <= 0 AND Epcam <= 0 AND P2ry12 <= 0 AND Krt14 > 0 AND Laptm5 <= 480	Spleen
Rule1179	Ptprcap > 8 AND Cd3g <= 1 AND Ttr <= 0 AND Csf1r <= 2 AND Krt17 <= 0 AND Mobp <= 4 AND Klk1 <= 1 AND Clps <= 0 AND 1190003J15Rik <= 0 AND Ins2 <= 0 AND Dmbt1 <= 0 AND Krt14 > 0 AND Cd79b <= 223	Fat
Rule1180	Ptprcap > 8 AND Cd3g <= 1 AND Ttr <= 0 AND Csf1r <= 2 AND Mobp <= 4 AND Krt17 <= 1 AND Klk1 <= 1 AND Clps <= 0 AND 1190003J15Rik <= 0 AND Ins2 <= 0 AND Dmbt1 <= 0 AND Calm4 <= 0 AND Ctsd > 70 AND B4galnt2 <= 0 AND Epcam <= 0 AND P2ry12 <= 0 AND C1qa <= 0 AND Hexb <= 112 AND Cd79b > 1	Spleen
Rule1181	Ptprcap > 8 AND Cd3g <= 1 AND Ttr <= 0 AND Mobp <= 4 AND Krt17 <= 1 AND Klk1 <= 1 AND Csf1r <= 2 AND Clps <= 0 AND 1190003J15Rik <= 0 AND Ctsd > 78 AND Fcrls <= 0 AND Hexb > 0 AND Tcf7 <= 4	Marrow
Rule1182	Ptprcap > 8 AND Cd3g <= 1 AND Ttr <= 0 AND Mobp <= 4 AND Krt17 <= 1 AND Klk1 <= 1 AND Csf1r <= 2 AND Clps <= 0 AND 1190003J15Rik <= 0 AND Ins2 <= 0 AND Calm4 <= 0 AND Cd79b <= 380 AND Krt14 <= 0 AND Asb5 <= 0 AND Sfn > 7 AND Ctsd <= 2 AND Mbp <= 0 AND Ctsd <= 0 AND Sfn <= 33	Muscle
Rule1183	Ptprcap > 8 AND Cd3g <= 1 AND Ttr <= 0 AND Mobp <= 4 AND Krt17 <= 1 AND Klk1 <= 1 AND Clps <= 0 AND Csf1r <= 2 AND 1190003J15Rik <= 0 AND Ins2 <= 0 AND Asb5 <= 0 AND Calm4 <= 0 AND Ptprcap > 768 AND Krt8 <= 0 AND Ptprc <= 237	Spleen
Rule1184	Ptprcap > 8 AND Cd3g <= 1 AND Ttr <= 0 AND Mobp <= 4 AND Krt17 <= 1 AND Klk1 <= 1 AND Csf1r <= 2 AND Clps <= 0 AND 1190003J15Rik <= 0 AND Krt14 <= 0 AND Ins2 <= 0 AND Asb5 <= 0 AND Calm4 <= 0 AND Ptprcap > 775 AND Epcam <= 0	Marrow
Rule1185	Ptprcap > 8 AND Cd3g <= 1 AND Mobp <= 4 AND Krt17 <= 1 AND Resp18 <= 0 AND Ttr <= 0 AND Klk1 <= 1 AND Csf1r <= 2 AND Clps <= 0 AND 1190003J15Rik > 0	Fat
Rule1186	Ptprcap > 8 AND Cd3g <= 1 AND Mobp <= 4 AND Krt17 <= 1 AND Resp18 <= 0 AND Ttr <= 0 AND Klk1 <= 1 AND Csf1r <= 2 AND Clps <= 0 AND Krt14 <= 0 AND Ins2 <= 0 AND Asb5 <= 0 AND Calm4 <= 0 AND Hpgds > 0	Marrow
Rule1187	Ptprcap > 8 AND Cd3g <= 1 AND Mobp <= 4 AND Krt17 <= 1 AND Resp18 <= 0 AND Ttr <= 0 AND Klk1 <= 1 AND Siglech <= 0 AND Clps <= 0 AND Csf1r > 2	Liver
Rule1188	Ptprcap > 8 AND Cd3g <= 1 AND Mobp <= 4 AND Krt17 <= 1 AND Resp18 <= 0 AND Ttr <= 0 AND Klk1 <= 1 AND Clps <= 0 AND Siglech > 0	Fat
Rule1189	Ptprcap > 8 AND Cd3g <= 1 AND Mobp <= 4 AND Krt17 <= 1 AND Resp18 <= 0 AND Ttr <= 0 AND Klk1 <= 1 AND Clps <= 0 AND Krt14 <= 0 AND Ins2 <= 0 AND Asb5 <= 0 AND Calm4 <= 0 AND Cd79b <= 384 AND Ckmt1 <= 0 AND Chga <= 0 AND Lgals4 > 0 AND Mbp <= 0	Spleen
Rule1190	Ptprcap > 8 AND Cd3g <= 1 AND Mobp <= 4 AND Krt17 <= 1 AND Resp18 <= 0 AND Ttr <= 0 AND Klk1 <= 1 AND Clps <= 0 AND Krt14 <= 0 AND Ins2 <= 0 AND Asb5 <= 0 AND Calm4 <= 0 AND Cd79b <= 384 AND Lgals4 <= 0 AND Prss32 <= 0 AND Ckmt1 <= 0 AND Fcrls > 0 AND Cd79b <= 0	Spleen
Rule1191	Ptprcap > 8 AND Cd3g <= 1 AND Mobp <= 4 AND Krt17 <= 1 AND Resp18 <= 0 AND Ttr <= 0 AND Klk1 <= 1 AND Clps <= 0 AND Krt14 <= 0 AND Fcrls > 0 AND Sfn <= 20	Fat
Rule1192	Ptprcap > 8 AND Cd3g <= 1 AND Mobp <= 4 AND Krt17 <= 1 AND Resp18 <= 0 AND Ttr <= 0 AND Klk1 <= 1 AND Clps <= 0 AND Krt14 <= 0 AND Ins2 <= 0 AND Fcrls <= 0 AND Asb5 <= 0 AND Krt15 <= 0 AND Cd79b > 384 AND P2ry12 <= 0 AND Capns2 <= 78 AND Cd79b > 895 AND Ctsd <= 1 AND Epcam <= 0 AND Sfn <= 19	Spleen
Rule1193	Ptprcap > 8 AND Cd3g <= 1 AND Mobp <= 4 AND Krt17 <= 1 AND Resp18 <= 0 AND Ttr <= 0 AND Klk1 <= 1 AND Clps <= 0 AND Krt14 <= 0 AND Ins2 <= 0 AND Fcrls <= 0 AND Asb5 <= 0 AND Krt15 <= 0 AND Cd79b > 384 AND Capns2 <= 78 AND Ctsd <= 18 AND Laptm5 > 20 AND Sfn <= 55 AND Krt8 <= 0 AND Epcam <= 0 AND Ptprc <= 322	Marrow
Rule1194	Ptprcap > 8 AND Cd3g <= 1 AND Mobp <= 4 AND Krt17 <= 1 AND Resp18 <= 0 AND Ttr <= 0 AND Klk1 <= 1 AND Clps <= 0 AND Krt14 <= 0 AND Ins2 <= 0 AND Fcrls <= 0 AND Asb5 <= 0 AND Krt15 <= 0 AND Coro1a > 1669 AND Mbp <= 0 AND Cd79b <= 1082	Fat
Rule1195	Ptprcap > 8 AND Cd3g <= 1 AND Mobp <= 4 AND Krt17 <= 1 AND Resp18 <= 0 AND Ttr <= 0 AND Klk1 <= 1 AND Clps <= 0 AND Krt14 <= 0 AND Ins2 <= 0 AND Fcrls <= 0 AND Asb5 <= 0 AND Prss32 <= 0 AND Chga <= 0 AND Krt15 <= 0 AND Tspan1 <= 0 AND Lgals4 > 0 AND Epcam <= 0	Marrow
Rule1196	Ptprcap > 8 AND Cd3g <= 1 AND Mobp <= 4 AND Krt17 <= 1 AND Resp18 <= 0 AND Ttr <= 0 AND Klk1 <= 1 AND Clps <= 0 AND Krt14 <= 0 AND Ins2 <= 0 AND Fcrls <= 0 AND Asb5 <= 0 AND Prss32 <= 0 AND Chga <= 0 AND Tspan1 <= 0 AND Krt15 <= 0 AND Lypd3 <= 0 AND Krt8 > 0 AND Sfn <= 2 AND Capns2 <= 78 AND Ptprcap <= 208	Spleen
Rule1197	Ptprcap > 8 AND Cd3g <= 1 AND Mobp <= 4 AND Krt17 <= 1 AND Resp18 <= 0 AND Ttr <= 0 AND Klk1 <= 1 AND Clps <= 0 AND Krt14 <= 0 AND Ins2 <= 0 AND Fcrls <= 0 AND Asb5 <= 0 AND Prss32 <= 0 AND Chga <= 0 AND Tspan1 <= 0 AND Krt15 <= 0 AND Lypd3 <= 0 AND Krt8 > 0 AND Laptm5 <= 202	Spleen
Rule1198	Ptprcap > 8 AND Cd3g <= 1 AND Mobp <= 4 AND Krt17 <= 1 AND Resp18 <= 0 AND Ttr <= 0 AND Klk1 <= 1 AND Clps <= 0 AND Krt14 <= 0 AND Krt8 > 0 AND Sfn <= 2	Fat
Rule1199	Ptprcap > 8 AND Cd3g <= 1 AND Mobp <= 4 AND Krt17 <= 1 AND Resp18 <= 0 AND Ttr <= 0 AND Klk1 <= 1 AND Clps <= 0 AND Krt8 <= 0 AND Cldn7 <= 0 AND Krt14 <= 0 AND Ins2 <= 0 AND Prss32 <= 0 AND Chga <= 0 AND Fcrls <= 0 AND Asb5 <= 0 AND Krt15 <= 0 AND Lypd3 <= 0 AND C1qa > 0 AND Cd79b <= 119	Muscle
Rule1200	Ptprcap > 8 AND Cd3g <= 1 AND Mobp <= 4 AND Krt17 <= 1 AND Resp18 <= 0 AND Ttr <= 0 AND Klk1 <= 1 AND Clps <= 0 AND Krt8 <= 0 AND Cldn7 <= 0 AND Coro1a > 1511 AND C1qb <= 0 AND Laptm5 > 377	Marrow
Rule1201	Ptprcap > 8 AND Cd3g <= 1 AND Mobp <= 4 AND Krt17 <= 1 AND Resp18 <= 0 AND Ttr <= 0 AND Klk1 <= 1 AND Krt8 > 0	Marrow
Rule1202	Ptprcap > 8 AND Cd3g <= 1 AND Mobp <= 4 AND Krt17 <= 1 AND Resp18 <= 0 AND Ttr <= 0 AND Klk1 <= 1 AND Clps <= 0 AND Cldn7 <= 0 AND Dmbt1 <= 0 AND Krt14 > 0 AND Hexb > 2	Muscle
Rule1203	Ptprcap > 8 AND Cd3g <= 1 AND Mobp <= 4 AND Krt17 <= 1 AND Resp18 <= 0 AND Ttr <= 0 AND Klk1 <= 1 AND Clps <= 0 AND Cldn7 <= 0 AND Dmbt1 <= 0 AND Fcrls <= 0 AND Asb5 <= 0 AND Cx3cr1 <= 1 AND Krt15 <= 0 AND Csf1r > 0	Spleen
Rule1204	Ptprcap > 8 AND Cd3g <= 1 AND Mobp <= 4 AND Krt17 <= 1 AND Resp18 <= 0 AND Ttr <= 0 AND Klk1 <= 1 AND Clps <= 0 AND Cldn7 <= 0 AND Dmbt1 <= 0 AND C1qa > 0 AND Ptprcap <= 49	Lung
Rule1205	Ptprcap > 8 AND Cd3g <= 1 AND Mobp <= 4 AND Krt17 <= 1 AND Resp18 <= 0 AND Ttr <= 0 AND Klk1 <= 1 AND Clps <= 0 AND C1qa <= 0 AND Cldn7 <= 0 AND Fcrls <= 0 AND Asb5 <= 0 AND Cx3cr1 > 1	Spleen
Rule1206	Ptprcap > 8 AND Cd3g <= 1 AND Mobp <= 4 AND Krt17 <= 1 AND Resp18 <= 0 AND Ttr <= 0 AND Klk1 <= 1 AND Clps <= 0 AND C1qa <= 0 AND Cldn7 <= 0 AND Fcrls <= 0 AND Krt15 <= 0 AND Asb5 <= 0 AND Ins2 <= 0 AND Lypd3 <= 0 AND P2ry12 > 0 AND Mbp <= 0 AND Tmem119 > 0	Spleen
Rule1207	Ptprcap > 8 AND Cd3g <= 1 AND Mobp <= 4 AND Krt17 <= 1 AND Resp18 <= 0 AND Ttr <= 0 AND Klk1 <= 1 AND Clps <= 0 AND C1qa <= 0 AND Cldn7 <= 0 AND Krt15 <= 0 AND Fcrls <= 0 AND Asb5 <= 0 AND Ins2 <= 0 AND Lypd3 <= 0 AND Lpcat2 <= 0 AND Rac2 > 652 AND Ctsd > 3	Spleen
Rule1208	Ptprcap > 8 AND Cd3g <= 1 AND Mobp <= 4 AND Krt17 <= 1 AND Resp18 <= 0 AND Ttr <= 0 AND Klk1 <= 1 AND Clps <= 0 AND C1qa <= 0 AND Cldn7 <= 0 AND Gpr34 <= 0 AND Ctsd > 126 AND Rac2 <= 749	Fat
Rule1209	Ptprcap > 8 AND Cd3g <= 1 AND Mobp <= 4 AND Krt17 <= 1 AND Resp18 <= 0 AND Ctsd > 77 AND 2210415F13Rik <= 0 AND Tcf7 <= 159 AND Hexb > 50	Kidney
Rule1210	Ptprcap > 8 AND Cd3g <= 1 AND Mobp <= 4 AND Krt17 <= 1 AND Resp18 <= 0 AND Fcrls > 0 AND P2ry12 <= 0	Muscle
Rule1211	Ptprcap > 8 AND Cd3g <= 1 AND Mobp <= 4 AND Krt17 <= 1 AND Resp18 <= 0 AND Fcrls <= 0 AND Lgals4 <= 3 AND C1qa > 0 AND Ttr <= 0	Fat
Rule1212	Ptprcap > 8 AND Cd3g <= 1 AND Mobp <= 4 AND Krt17 <= 1 AND Resp18 <= 0 AND Fcrls <= 0 AND Lgals4 <= 3 AND C1qa <= 0 AND Krt14 > 0 AND Krt14 <= 1	Spleen
Rule1213	Ptprcap > 8 AND Cd3g <= 1 AND Mobp <= 4 AND Krt17 <= 1 AND Resp18 <= 0 AND Fcrls <= 0 AND Lgals4 <= 3 AND Krt14 <= 1 AND C1qa <= 0 AND Cd79b <= 361 AND Chga > 0	Fat
Rule1214	Ptprcap > 8 AND Cd3g <= 1 AND Mobp <= 4 AND Krt17 <= 1 AND Resp18 <= 0 AND Fcrls <= 0 AND Lgals4 <= 3 AND Krt14 <= 1 AND C1qa > 0	Spleen
Rule1215	Ptprcap > 8 AND Cd3g <= 1 AND Mobp <= 4 AND Krt17 <= 1 AND Resp18 <= 0 AND Krt14 <= 1 AND Fcrls <= 0 AND Lgals4 <= 3 AND Cd79b <= 361 AND Asb5 <= 0 AND Lypd3 <= 0 AND Dmbt1 <= 0 AND Gc <= 1 AND Tcf7 <= 28 AND Lpcat2 > 0 AND Hexb <= 0	Muscle
Rule1216	Ptprcap > 8 AND Cd3g <= 1 AND Mobp <= 4 AND Krt17 <= 1 AND Resp18 <= 0 AND Krt14 <= 1 AND Fcrls <= 0 AND Lgals4 <= 3 AND Lpcat2 <= 0 AND Perp > 0	Spleen
Rule1217	Ptprcap > 8 AND Cd3g <= 1 AND Mobp <= 4 AND Krt17 <= 1 AND Resp18 <= 0 AND Krt14 <= 1 AND Fcrls <= 0 AND Lgals4 <= 3 AND Clps <= 0 AND Lpcat2 <= 0 AND Ttr <= 0 AND Cldn7 <= 0 AND Krt15 <= 0 AND Gpr34 <= 0 AND Ins2 <= 0 AND Asb5 <= 0 AND Hexb > 23 AND Laptm5 <= 193	Spleen
Rule1218	Ptprcap > 8 AND Cd3g <= 1 AND Mobp <= 4 AND Krt17 <= 1 AND Resp18 <= 0 AND Krt14 <= 1 AND Fcrls <= 0 AND Lgals4 <= 3 AND Lgmn > 76 AND Mbp <= 0 AND Coro1a <= 984	Lung
Rule1219	Ptprcap > 8 AND Cd3g <= 1 AND Mobp <= 4 AND Krt17 <= 1 AND Resp18 <= 0 AND Krt14 <= 1 AND Fcrls <= 0 AND Lgals4 <= 3 AND Lpcat2 <= 0 AND Cldn7 <= 0 AND Cx3cr1 <= 0 AND Ttr <= 0 AND Krt15 <= 0 AND Gpr34 <= 0 AND Asb5 <= 0 AND C1qc <= 0 AND P2ry12 > 0 AND Ptprcap > 93	Spleen
Rule1220	Ptprcap > 8 AND Cd3g <= 1 AND Mobp <= 4 AND Krt17 <= 1 AND Resp18 <= 0 AND Krt14 <= 1 AND Fcrls <= 0 AND Lgals4 <= 3 AND Lpcat2 <= 0 AND Cldn7 <= 0 AND Cx3cr1 <= 0 AND Ttr <= 0 AND Krt15 <= 0 AND Gpr34 <= 0 AND B4galnt2 <= 3 AND C1qc <= 0 AND Ins2 > 0 AND Sfn <= 7 AND Ctsd <= 0 AND Hexb <= 1	Muscle
Rule1221	Ptprcap > 8 AND Cd3g <= 1 AND Mobp <= 4 AND Krt17 <= 1 AND Resp18 <= 0 AND Krt14 <= 1 AND Fcrls <= 0 AND Lgals4 <= 3 AND Lpcat2 <= 0 AND Cx3cr1 <= 0 AND Ttr <= 0 AND Krt15 <= 0 AND Cldn7 <= 0 AND Gpr34 <= 0 AND B4galnt2 <= 3 AND Ins2 > 0 AND Coro1a > 284 AND Sfn > 7	Spleen
Rule1222	Ptprcap > 8 AND Cd3g <= 1 AND Mobp <= 4 AND Krt17 <= 1 AND Resp18 <= 0 AND Krt14 <= 1 AND Fcrls <= 0 AND Lgals4 <= 3 AND Cx3cr1 <= 0 AND Lpcat2 <= 0 AND Ttr <= 0 AND Ins2 <= 0 AND Lypd3 <= 0 AND Krt15 <= 0 AND Tcf7 <= 20 AND Asb5 <= 0 AND Krt19 <= 0 AND Laptm5 <= 27 AND Cd79b > 19 AND Mbp <= 0 AND Rac2 > 129	Spleen
Rule1223	Cd3e > 1 AND Col17a1 > 2 AND P2ry12 <= 0	Trachea
Rule1224	Cd3e > 1 AND Calm4 > 0 AND Laptm5 <= 246	Muscle
Rule1225	Cd3e > 1 AND Fcrls > 6 AND Gc <= 0 AND Slc2a5 <= 0 AND Cd8b1 <= 16	Marrow
Rule1226	Cd3e > 1 AND Fcrls > 9 AND Gc <= 0 AND Trem2 <= 2	Trachea
Rule1227	Cd3e > 1 AND Cd3g <= 1 AND Cdhr5 <= 4 AND Gc <= 0 AND Dmkn <= 0 AND Tspan1 <= 0 AND Trp63 <= 0 AND P2ry12 <= 1 AND Ptprcap <= 5 AND Tcf7 > 1 AND Gpr34 <= 0 AND Ptprc > 11	Thymus
Rule1228	Cd3e > 1 AND Cd3g > 1 AND Krt13 > 0 AND Mbp <= 136 AND Calml3 <= 0 AND Dmkn <= 0	Fat
Rule1229	Cd3e > 1 AND Cd3g > 1 AND Cela2a > 0 AND Ptprcap > 121 AND Cd8b1 <= 540	Heart
Rule1230	Cd3e > 1 AND Cd3g > 1 AND Cela2a > 0 AND Tmem119 <= 0 AND Ptprcap <= 0 AND Ccr9 > 0	Thymus
Rule1231	Cd3e > 1 AND Cd3g > 1 AND Ins2 <= 0 AND Aqp3 > 42 AND Csf1r > 0	Muscle
Rule1232	Cd3e > 1 AND Cd3g > 1 AND Ins2 <= 0 AND Crybb1 > 0 AND Gc <= 0	Thymus
Rule1233	Cd3e > 1 AND Cd3g > 1 AND Ins2 <= 0 AND Hpgds > 9 AND Siglech <= 0 AND C1qb <= 0 AND Ttr <= 0 AND Coro1a <= 1603	Spleen
Rule1234	Cd3e > 1 AND Cd3g > 1 AND Ins2 <= 0 AND Hpgds > 9 AND Krt8 <= 0 AND Coro1a <= 1479	Lung
Rule1235	Cd3e > 1 AND Cd3g > 1 AND Ins2 <= 0 AND Cd3d > 350 AND Eps8l3 <= 0 AND Cpa1 > 0	Lung
Rule1236	Cd3e > 1 AND Cd3g > 1 AND Ins2 <= 0 AND Cd3d > 350 AND Eps8l3 <= 0 AND Hpgds > 0 AND P2ry12 <= 1	Heart
Rule1237	Cd3e > 1 AND Cd3g > 1 AND Ins2 <= 0 AND Cd3d > 350 AND Eps8l3 <= 0 AND Cdh1 <= 0 AND Hpgds <= 0 AND Sycn > 0	Lung
Rule1238	Cd3e > 1 AND Cd3g > 1 AND Ins2 <= 0 AND Cd3d > 350 AND Eps8l3 <= 0 AND Cdh1 <= 0 AND Hpgds <= 0 AND Csf1r > 1 AND Hexb <= 1	Thymus
Rule1239	Cd3e > 1 AND Cd3g > 1 AND Ins2 <= 0 AND Cd3d > 350 AND Eps8l3 <= 0 AND Csf1r <= 1 AND Cx3cr1 <= 2 AND Dsp <= 1 AND Clps <= 0 AND P2ry13 <= 0 AND Lgmn <= 109 AND Trem2 > 0 AND Mbp <= 5	Thymus
Rule1240	Cd3e > 1 AND Cd3g > 1 AND Ins2 <= 0 AND Krt5 <= 0 AND Gc > 0 AND Cd8b1 <= 23	Liver
Rule1241	Cd3e > 1 AND Cd3g > 1 AND Ins2 <= 0 AND Krt5 <= 0 AND Mobp <= 0 AND Coro1a > 260 AND Sfn > 1 AND Ccr9 <= 140 AND Cd79b <= 0	Fat
Rule1242	Cd3e > 1 AND Cd3g > 1 AND Ins2 <= 0 AND Krt5 <= 0 AND Mobp <= 0 AND Cd3d > 334 AND Eps8l3 <= 0 AND Serpinb5 <= 0 AND Csf1r > 1 AND Fcrls <= 1	Fat
Rule1243	Cd3e > 1 AND Cd3g > 1 AND Ins2 <= 0 AND Cd3d > 350 AND Eps8l3 <= 0 AND Trem2 <= 0 AND Cx3cr1 <= 2 AND Clps <= 0 AND P2ry13 > 0 AND P2ry12 <= 0	Thymus
Rule1244	Cd3e > 1 AND Cd3g > 1 AND Ins2 <= 0 AND Cd3d > 350 AND Eps8l3 <= 0 AND Trem2 <= 0 AND P2ry13 <= 0 AND Cx3cr1 <= 2 AND Lgmn <= 109 AND Clps <= 0 AND Slc2a5 <= 0 AND Trim29 <= 0 AND Dmbt1 > 0	Spleen
Rule1245	Cd3e > 1 AND Cd3g > 1 AND Ins2 <= 0 AND Cd3d > 350 AND Eps8l3 <= 0 AND Trem2 <= 0 AND P2ry13 <= 0 AND Clps <= 0 AND Cx3cr1 <= 2 AND Lgmn <= 109 AND Slc2a5 <= 0 AND Trim29 <= 0 AND Tmem27 <= 0 AND Lgals7 <= 0 AND Krt5 <= 0 AND C1qa <= 1 AND Klk1 <= 0 AND Trp63 <= 0 AND Dmkn <= 0 AND Krt15 > 1 AND Coro1a > 3406	Thymus
Rule1246	Cd3e > 1 AND Cd3g > 1 AND Ins2 <= 0 AND Mobp <= 0 AND Dmkn <= 0 AND Tcf7 > 65 AND Trp63 <= 0 AND Trem2 <= 0 AND Cd79b <= 96 AND Tmem27 <= 0 AND Cd3e <= 5 AND C1qc <= 0 AND Tmem119 <= 0 AND Krt14 <= 0 AND Ccr9 <= 0 AND Ptprcap <= 316	Fat
Rule1247	Cd3e > 1 AND Cd3g > 1 AND Ins2 <= 0 AND Mobp <= 0 AND Dmkn <= 0 AND Krt5 <= 0 AND Cd3d > 377 AND Trem2 <= 0 AND Krt15 <= 1 AND Serpinb5 <= 0 AND Klk1 <= 0 AND Trp63 <= 0 AND Ptprc <= 1750 AND C1qa <= 1 AND Slc2a5 <= 0 AND Lgals7 <= 15 AND Perp <= 0 AND Coro1a <= 6495 AND Cd3e <= 224 AND Asb5 <= 0 AND Gpr34 <= 20 AND Myb <= 0 AND Krt17 <= 0 AND Cd79b <= 205 AND Krt8 <= 3 AND Ctsd <= 0	Spleen
Rule1248	Cd3e > 1 AND Cd3g > 1 AND Ins2 <= 0 AND Chga <= 0 AND Cd3d > 351 AND Eps8l3 <= 0 AND Trem2 <= 0 AND P2ry13 <= 0 AND Cx3cr1 <= 2 AND Trim29 <= 0 AND Lgmn <= 109 AND Mobp <= 0 AND Krt6a > 0	Thymus
Rule1249	Cd3e > 1 AND Cd3g > 1 AND Ins2 <= 0 AND Chga <= 0 AND Cd3d > 351 AND Eps8l3 <= 0 AND Trem2 <= 0 AND P2ry13 <= 0 AND Cx3cr1 <= 2 AND Trim29 <= 0 AND Lgmn <= 109 AND Mobp <= 0 AND Lgals7 > 0	Thymus
Rule1250	Cd3e > 1 AND Cd3g > 1 AND Ins2 <= 0 AND Chga <= 0 AND Cd3d > 350 AND Eps8l3 <= 0 AND Trem2 <= 0 AND P2ry13 <= 0 AND Cx3cr1 <= 2 AND Trim29 <= 0 AND Lgmn <= 109 AND Mobp > 0	Lung
Rule1251	Cd3e > 1 AND Cd3g > 1 AND Ins2 <= 0 AND Mobp <= 0 AND Chga <= 0 AND Cd3d > 350 AND Eps8l3 <= 0 AND Trem2 <= 0 AND P2ry13 <= 0 AND Cx3cr1 <= 2 AND Lgmn > 109	Fat
Rule1252	Cd3e > 1 AND Cd3g > 1 AND Ins2 <= 0 AND Mobp <= 0 AND Chga <= 0 AND Cd3d > 350 AND Eps8l3 <= 0 AND Trem2 <= 0 AND P2ry13 <= 0 AND Cx3cr1 <= 2 AND Ctsd > 43 AND Trp63 <= 0 AND Klk1 <= 0 AND Slc2a5 <= 0 AND Capns2 <= 0 AND Ptprc > 2074 AND Gpr34 <= 0	Marrow
Rule1253	Cd3e > 1 AND Cd3g > 1 AND Ins2 <= 0 AND Mobp <= 0 AND Chga <= 0 AND Cd3d > 350 AND Eps8l3 <= 0 AND Trem2 <= 0 AND P2ry13 <= 0 AND Cx3cr1 <= 2 AND Tmem119 > 1 AND Gpr34 <= 0	Spleen
Rule1254	Cd3e > 1 AND Cd3g > 1 AND Ins2 <= 0 AND Mobp <= 0 AND Chga <= 0 AND Cd3d > 350 AND Eps8l3 <= 0 AND Trem2 <= 0 AND P2ry13 <= 0 AND Tmem119 <= 1 AND Coro1a > 5736 AND Ptprc <= 1396	Thymus
Rule1255	Cd3e > 1 AND Cd3g > 1 AND Ins2 <= 0 AND Mobp <= 0 AND Chga <= 0 AND Krt19 > 0 AND Trem2 <= 0 AND Eps8l3 <= 0 AND Krt17 <= 0 AND Laptm5 <= 2080 AND Cd79b <= 33 AND 2210415F13Rik <= 0 AND Mbp <= 138 AND Cd8a <= 0	Thymus
Rule1256	Cd3e > 1 AND Cd3g > 1 AND Ins2 <= 0 AND Mobp <= 0 AND Chga <= 0 AND Perp > 0 AND Hpgds <= 0 AND Cd3d <= 45 AND Hexb <= 5	Marrow
Rule1257	Cd3e > 1 AND Cd3g > 1 AND Ins2 <= 0 AND Mobp <= 0 AND Chga <= 0 AND Perp > 0 AND Hpgds <= 0 AND Krt17 <= 0 AND Epcam <= 0 AND Rac2 > 72 AND Ptprcap <= 324	Fat
Rule1258	Cd3e > 1 AND Cd3g > 1 AND Ins2 <= 0 AND Coro1a > 124 AND Mobp <= 0 AND Chga <= 0 AND Krt5 <= 0 AND Klk1 > 0 AND Cd8b1 <= 363	Marrow
Rule1259	Cd3e > 1 AND Cd3g > 1 AND Ins2 <= 0 AND Coro1a > 124 AND Mobp <= 0 AND Chga <= 0 AND Trem2 <= 0 AND Cx3cr1 <= 0 AND Krt5 <= 0 AND Cd79b <= 22 AND Pkp1 <= 0 AND Ptprc > 2537 AND Ptprcap <= 686	Fat
Rule1260	Cd3e > 1 AND Cd3g > 1 AND Ins2 <= 0 AND Mobp <= 0 AND Chga <= 0 AND Rac2 > 77 AND Fosl1 <= 0 AND Cd3d > 350 AND Eps8l3 <= 0 AND Trem2 <= 0 AND P2ry13 <= 0 AND Krt15 <= 0 AND Trp63 <= 0 AND C1qa <= 1 AND C1qb <= 1 AND Cd3e <= 228 AND Cd3e > 11 AND Gpr34 <= 192 AND Perp <= 0 AND Myb <= 4 AND Csf1r > 0 AND Cd3g <= 570	Spleen
Rule1261	Cd3e > 1 AND Cd3g > 1 AND Ins2 <= 0 AND Mobp <= 0 AND Chga <= 0 AND Rac2 > 77 AND Fosl1 <= 0 AND Cd3d > 351 AND Eps8l3 <= 0 AND Trem2 <= 0 AND P2ry13 <= 0 AND Krt5 <= 0 AND C1qa <= 1 AND Trp63 <= 0 AND Siglech <= 0 AND Tmem27 <= 0 AND Dmkn <= 0 AND Laptm5 <= 772 AND Krt14 <= 0 AND Ptprc <= 638	Thymus
Rule1262	Cd3e > 1 AND Cd3g > 1 AND Ins2 <= 0 AND Mobp <= 0 AND Chga <= 0 AND Rac2 > 77 AND Chodl <= 0 AND Krt5 <= 0 AND Siglech <= 0 AND Trem2 > 0 AND Tcf7 > 76	Marrow
Rule1263	Cd3e > 1 AND Cd3g > 1 AND Ins2 <= 0 AND Mobp <= 0 AND Chga <= 0 AND Dmkn <= 0 AND Rac2 > 58 AND Fosl1 > 0	Muscle
Rule1264	Cd3e > 1 AND Cd3g > 1 AND Ins2 <= 0 AND Mobp <= 0 AND Chga <= 0 AND Dmkn <= 0 AND Rac2 > 58 AND Krt5 <= 0 AND Krt15 > 1 AND Mbp <= 18 AND Ptprcap > 247	Fat
Rule1265	Cd3e > 1 AND Cd3g > 1 AND Ins2 <= 0 AND Mobp <= 0 AND Chga <= 0 AND Dmkn <= 0 AND Rac2 > 58 AND Krt5 <= 0 AND Siglech <= 0 AND Cd79b <= 8 AND Pnlip <= 0 AND Cx3cr1 <= 0 AND Krt15 > 1 AND Ptprcap <= 64	Muscle
Rule1266	Cd3e > 1 AND Cd3g > 1 AND Ins2 <= 0 AND Mobp <= 0 AND Chga <= 0 AND Dmkn <= 0 AND Rac2 > 58 AND Krt5 <= 0 AND Siglech <= 0 AND Cx3cr1 <= 0 AND Resp18 <= 0 AND Cd79b <= 8 AND Coro1a > 768 AND Dsc3 <= 0 AND Trp63 <= 0 AND Eps8l3 <= 0 AND Perp <= 0 AND Ptprc > 3 AND Ckmt1 > 0	Spleen
Rule1267	Cd3e > 1 AND Cd3g > 1 AND Ins2 <= 0 AND Mobp <= 0 AND Chga <= 0 AND Dmkn <= 0 AND Rac2 > 58 AND Krt5 <= 0 AND Siglech <= 0 AND Cx3cr1 <= 0 AND Resp18 <= 0 AND Cd79b <= 6 AND Coro1a > 768 AND Dsc3 <= 0 AND Trp63 <= 0 AND Eps8l3 <= 0 AND Perp > 0	Thymus
Rule1268	Cd3e > 1 AND Cd3g > 1 AND Ins2 <= 0 AND Mobp <= 0 AND Chga <= 0 AND Dmkn <= 0 AND Rac2 > 58 AND Krt5 <= 0 AND Siglech <= 0 AND Cx3cr1 <= 0 AND Resp18 > 0	Marrow
Rule1269	Cd3e > 1 AND Cd3g > 1 AND Ins2 <= 0 AND Mobp <= 0 AND Chga <= 0 AND Dmkn <= 0 AND Rac2 > 58 AND Krt5 <= 0 AND Siglech <= 0 AND Cx3cr1 <= 0 AND Cd79b <= 6 AND Coro1a > 768 AND Dsc3 <= 0 AND Trp63 <= 0 AND Eps8l3 <= 0 AND Ptprc > 3 AND Hpgds > 0 AND Krt8 <= 0	Fat
Rule1270	Cd3e > 1 AND Cd3g > 1 AND Ins2 <= 0 AND Mobp <= 0 AND Chga <= 0 AND Dmkn <= 0 AND Rac2 > 58 AND Krt5 <= 0 AND Siglech <= 0 AND Cx3cr1 <= 0 AND Cd79b <= 6 AND Coro1a > 768 AND Dsc3 <= 0 AND Trp63 <= 0 AND Eps8l3 <= 0 AND Ptprc > 3 AND Tmem119 <= 0 AND Sfn <= 0 AND Aqp3 <= 1 AND Mbp <= 12 AND Dmbt1 <= 0 AND Tspan1 <= 0 AND Cd3e <= 127 AND P2ry12 <= 0 AND Krt14 <= 0 AND Tcf7 > 221 AND Cd3g <= 1016	Spleen
Rule1271	Chodl > 2 AND Scel <= 0 AND Foxf1a <= 1 AND Tmem119 <= 129 AND Lpcat2 > 11 AND Cd8a <= 0	Fat
Rule1272	Chodl > 2 AND Scel <= 0 AND Foxf1a <= 1 AND Tmem119 <= 129 AND Dmbt1 <= 2 AND Cdh17 <= 0 AND Dsp > 1 AND Lgals7 <= 0	Trachea
Rule1273	Chodl > 2 AND Scel <= 0 AND Tmem119 <= 5 AND Foxf1a <= 36 AND Dmbt1 <= 2 AND Cdh17 <= 0 AND Phgr1 <= 0 AND Hpgds <= 15 AND Fxyd3 <= 9 AND Pkp1 <= 4 AND Sfn <= 209 AND 2610528A11Rik <= 0 AND Oit1 <= 0 AND Guca2a <= 0 AND Fcrls <= 1 AND Epcam <= 2 AND Sycn <= 0 AND Mobp <= 1 AND Gc <= 1 AND Coro1a <= 8 AND Rac2 <= 1 AND Foxf1a <= 13 AND Klk1 <= 1 AND Pkp1 <= 0 AND Pigr <= 0 AND Tspan8 <= 0 AND Ptpr…	Muscle
Rule1274	Chodl > 2 AND Scel <= 0 AND Tmem119 <= 5 AND Foxf1a <= 36 AND Dmbt1 <= 2 AND Cdh17 <= 0 AND Phgr1 <= 0 AND Hpgds <= 15 AND Fxyd3 <= 9 AND Pkp1 <= 4 AND Sfn <= 226 AND Laptm5 <= 0 AND Fcrls <= 1 AND Ptprc <= 0 AND Rnase1 <= 0 AND Gc <= 1 AND Pkp1 <= 0 AND Oit1 <= 0 AND Cela2a <= 3 AND Guca2a <= 0 AND Epcam <= 1 AND Resp18 <= 0 AND Pigr <= 0 AND P2ry13 <= 0 AND Ptprcap <= 1 AND Try4 <= 0 AND Gpx2 <…	Muscle
Rule1275	Fosl1 > 1 AND Dsc3 > 5 AND Gpx2 <= 26 AND Krt14 > 2851 AND Cela2a <= 1 AND Chga <= 0 AND Ttr <= 1 AND Pcsk1n <= 0 AND 2610528A11Rik <= 44 AND Aqp3 > 481	Mammary
Rule1276	Fosl1 > 1 AND Dsc3 > 5 AND Gpx2 <= 26 AND C1qb <= 1 AND Prss32 <= 1	Skin
Rule1277	Fosl1 > 1 AND Rac2 > 342 AND C1qa > 19 AND Fcrls <= 623	Muscle
Rule1278	Fosl1 > 1 AND Rac2 > 342 AND Lgals7 <= 78 AND Cldn7 > 1 AND Csf1r <= 61	Muscle
Rule1279	Fosl1 > 1 AND Rac2 > 342 AND Lgals7 <= 78 AND Fcrls > 5 AND Perp <= 0	Trachea
Rule1280	Fosl1 > 1 AND Rac2 > 342 AND Lgals7 <= 78 AND Tspan8 <= 22 AND Epcam <= 12 AND Lgmn <= 10 AND Csf1r <= 481 AND Cdh1 <= 0 AND Krt8 <= 1 AND Cd3e <= 2 AND P2ry12 <= 85 AND Cx3cr1 <= 35 AND Fcrls <= 0 AND Sycn <= 0 AND Cd8b1 <= 0 AND S100a14 <= 0 AND Rac2 > 553 AND Asb5 <= 0 AND Ttr <= 1 AND Rac2 > 1482	Marrow
Rule1281	Fosl1 > 1 AND Rac2 > 342 AND Lgals7 <= 46 AND Coro1a > 6454	Lung
Rule1282	Fosl1 > 1 AND Rac2 > 342 AND Lgals7 <= 46 AND Tmem119 <= 59 AND Epcam <= 12 AND Col17a1 <= 3 AND Pigr > 0 AND Siglech <= 0	Trachea
Rule1283	Fosl1 > 1 AND Rac2 > 342 AND Lgals7 <= 46 AND Tmem119 > 59	Lung
Rule1284	Fosl1 > 1 AND Rac2 > 342 AND Lgals7 <= 46 AND Epcam <= 12 AND Col17a1 <= 3 AND Krt19 > 0 AND Cldn3 > 0	Trachea
Rule1285	Fosl1 > 1 AND Rac2 > 342 AND Lgals7 <= 46 AND Epcam <= 12 AND Col17a1 <= 3 AND Scel <= 1 AND Clca2 <= 0 AND Cdh1 <= 0 AND Resp18 <= 0 AND Hpgds <= 56 AND Tmem45b <= 0 AND Ptprc > 946 AND Ins2 <= 0	Fat
Rule1286	Fosl1 > 1 AND Rac2 > 342 AND Lgals7 <= 46 AND Epcam <= 12 AND Col17a1 <= 3 AND Scel <= 1 AND Krt15 <= 2 AND Ptprc <= 1392 AND Guca2a <= 0 AND Hpgds <= 18 AND Fxyd3 <= 0 AND Dsp <= 0 AND Krt19 <= 0 AND Cd79b <= 1 AND Cd3d <= 0 AND P2ry12 <= 19 AND Perp <= 0 AND Resp18 <= 0 AND Gpr34 <= 0 AND P2ry12 <= 0 AND Epcam <= 0 AND Ctsd <= 236	Marrow
Rule1287	Fosl1 > 1 AND Lypd3 > 15 AND Chga <= 0 AND Calml3 <= 1 AND Pitx1 <= 43 AND Tmem45b <= 4 AND Aqp3 <= 1628	Mammary
Rule1288	Fosl1 > 1 AND Rac2 > 342 AND Lgals7 <= 46 AND Epcam <= 12 AND Col17a1 <= 3 AND Scel <= 1 AND Cdh1 <= 0 AND Ptprc <= 1435 AND Resp18 <= 0 AND Guca2a <= 0 AND Rac2 <= 2880 AND Lgals4 <= 9 AND Ptprc > 93 AND Cela2a <= 0	Fat
Rule1289	Fosl1 > 1 AND Tspan8 <= 1 AND Calml3 > 4 AND Dmkn <= 4	Trachea
Rule1290	Fosl1 > 1 AND Tspan8 <= 1 AND Cdh1 > 7 AND Pitx1 <= 1 AND Tmem45b <= 0 AND Tfap2b <= 5 AND Perp <= 144	Trachea
Rule1291	Fosl1 > 1 AND Lypd3 <= 3 AND Cdh1 <= 30 AND Tspan8 > 2 AND Fxyd3 > 26 AND Serpinb5 <= 0	Trachea
Rule1292	Fosl1 > 1 AND Lypd3 <= 3 AND Cdh1 <= 30 AND Tspan8 <= 3 AND Asb5 > 1 AND Cx3cr1 <= 1 AND Lgals7 <= 6 AND 2210415F13Rik <= 1 AND Cdh17 <= 19 AND Phgr1 <= 0 AND Pkp1 <= 4 AND Epcam <= 80 AND Mobp <= 0 AND Sfn <= 112 AND Ptprcap <= 2 AND Cd3d <= 0 AND Trem2 <= 0 AND Tmem119 <= 136 AND Lypd3 <= 0 AND Lgmn <= 64 AND Guca2a <= 0 AND 2210415F13Rik <= 0 AND Cx3cr1 <= 0 AND Gpr34 <= 0 AND C1qa <= 0 AND C1…	Muscle
Rule1293	Fosl1 > 1 AND Lypd3 <= 3 AND Cdh1 <= 30 AND Tspan8 <= 3 AND Coro1a > 20 AND Rac2 > 476 AND Fxyd3 <= 0 AND Cx3cr1 <= 64 AND Ptprc <= 1242 AND Fosl1 <= 56	Marrow
Rule1294	Fosl1 > 1 AND Lypd3 <= 3 AND Cdh1 <= 30 AND Tspan8 <= 3 AND Asb5 > 1 AND Cx3cr1 <= 1 AND Lgals7 <= 6 AND 2210415F13Rik <= 1 AND Cdh17 <= 19 AND Phgr1 <= 0 AND Pkp1 <= 4 AND Epcam <= 80 AND Mobp <= 0 AND Sfn <= 112 AND Ptprcap <= 2 AND Cd3d <= 0 AND Pigr <= 0 AND Oit1 <= 0 AND Trem2 <= 0 AND Tmem119 <= 136 AND Lypd3 <= 0 AND Lgmn <= 103 AND 2210415F13Rik <= 0 AND Cx3cr1 <= 0 AND Gpr34 <= 0 AND C1q…	Muscle
Rule1295	Fosl1 > 1 AND Lypd3 <= 3 AND Cdh1 <= 30 AND Tspan8 <= 3 AND Foxf1a > 0 AND Rnase1 <= 89 AND Pitx2 > 4 AND Lgals4 <= 1	Bladder
Rule1296	Fosl1 > 1 AND Tspan8 <= 2 AND Ckmt1 <= 8 AND Asb5 > 1 AND Cx3cr1 <= 1 AND Lgals7 <= 6 AND 2210415F13Rik <= 1 AND Cdh17 <= 19 AND Phgr1 <= 0 AND Pkp1 <= 4 AND Epcam <= 77 AND Mobp <= 0 AND Sfn <= 112 AND Pitx1 <= 4 AND Pigr <= 0 AND Serpinb5 <= 0 AND Ccr9 <= 0 AND Ptprcap <= 2 AND Lypd3 <= 0 AND Oit1 <= 0 AND Trem2 <= 0 AND Lgmn <= 64 AND 2210415F13Rik <= 0 AND C1qc > 0	Muscle
Rule1297	Fosl1 > 1 AND Tspan8 <= 2 AND Ckmt1 <= 8 AND Foxf1a > 0 AND Lypd3 <= 2 AND Rnase1 <= 89 AND Serpinb5 <= 0 AND Ctsd > 91 AND Ctsd <= 2963 AND Hexb > 328 AND Fosl1 > 4	Trachea
Rule1298	Fosl1 > 1 AND Tspan8 <= 2 AND Ckmt1 <= 8 AND Foxf1a > 10 AND Trp63 <= 0 AND Rnase1 <= 89 AND Hexb <= 466 AND Dmkn <= 20 AND Serpinb5 <= 0 AND S100a14 <= 0 AND Prss32 <= 0 AND Krt8 <= 1 AND Ptprcap <= 0 AND Siglech <= 0 AND Cx3cr1 <= 0 AND Fosl1 <= 292 AND Slc2a5 <= 0 AND P2ry12 <= 1 AND Csf1r <= 21 AND Cldn3 <= 157 AND Cdh1 <= 0 AND Oit1 <= 0 AND Guca2a <= 0 AND Ctrb1 <= 11 AND Krt19 <= 1 AND Tme…	Trachea
Rule1299	Fosl1 > 1 AND Tspan8 <= 2 AND Ckmt1 <= 8 AND Fxyd3 > 2 AND Pcsk1n > 15	Colon
Rule1300	Fosl1 > 1 AND Tspan8 <= 2 AND Ckmt1 <= 8 AND Fxyd3 > 7 AND Dmkn <= 12 AND Serpinb5 <= 3 AND Lgals7 <= 13 AND Clca2 <= 126 AND Scel <= 1	Trachea
Rule1301	Fosl1 > 1 AND Tspan8 <= 2 AND Ckmt1 <= 8 AND Asb5 > 1 AND Cx3cr1 <= 50 AND Cdx1 <= 0 AND Scel <= 0 AND Pkp1 <= 4 AND Tspan1 <= 3 AND Epcam <= 77 AND Cdh17 <= 19 AND Lgals7 <= 7 AND Pitx1 <= 4 AND Mobp <= 0 AND Gpx2 <= 0 AND Serpinb5 <= 0 AND Pigr <= 0 AND Epcam <= 1 AND Oit1 <= 0 AND Ccr9 <= 0 AND Ptprcap <= 2 AND Lypd3 <= 0 AND Trem2 <= 0 AND Lgmn <= 64 AND Epcam <= 0 AND 2210415F13Rik <= 0 AND …	Muscle
Rule1302	Fosl1 > 1 AND Tspan8 <= 2 AND Ckmt1 <= 8 AND Gc > 0 AND B4galnt2 <= 0	Muscle
Rule1303	Fosl1 > 1 AND Tspan8 <= 2 AND Ckmt1 <= 8 AND Asb5 > 1 AND Cx3cr1 <= 50 AND Cdx1 <= 0 AND Scel <= 0 AND Pkp1 <= 4 AND Tspan1 <= 3 AND Epcam <= 77 AND Cdh17 <= 19 AND Lgals7 <= 7 AND Pitx1 <= 4 AND Mobp <= 0 AND Gpx2 <= 0 AND Fosl1 > 2 AND Lypd3 <= 0 AND Pigr <= 0 AND Sfn <= 81 AND Ptprcap <= 2 AND Klk1 <= 2 AND Cd8a <= 1 AND Lgmn <= 64 AND 2210415F13Rik <= 0 AND Cx3cr1 > 0	Muscle
Rule1304	Fosl1 > 1 AND Tspan8 <= 2 AND Ckmt1 <= 8 AND Pax9 > 1 AND Trp63 <= 1 AND C1qa <= 0 AND Tspan1 <= 50 AND Hpgds <= 5 AND Dmkn <= 0 AND C1qb <= 0	Trachea
Rule1305	Fosl1 > 1 AND Tspan8 <= 2 AND Ckmt1 <= 8 AND Krt19 > 7 AND Lgals7 <= 5 AND Chga <= 0 AND Gpx2 <= 15 AND Tm4sf4 <= 2 AND Tspan8 <= 0 AND Pax9 <= 0 AND Fcrls <= 0 AND Trim29 <= 0 AND C1qc <= 0 AND Ins2 <= 0 AND Cdhr5 <= 4 AND Lgals4 <= 10 AND Fam25c <= 22 AND Ccr9 <= 9 AND Col17a1 <= 0 AND C1qa <= 0 AND Coro1a <= 0 AND 2610528A11Rik <= 0 AND 2210415F13Rik <= 0 AND Klk1 <= 0 AND Oit1 <= 0 AND Pitx1 …	Mammary
Rule1306	Fosl1 > 1 AND Tspan8 <= 2 AND Ckmt1 <= 8 AND Fcrls > 46 AND Krt5 <= 0 AND C1qc <= 2661	Trachea
Rule1307	Fosl1 > 1 AND Tspan8 <= 2 AND Ckmt1 <= 8 AND Foxf1a > 10 AND Trp63 <= 0 AND Rnase1 <= 89 AND Hexb <= 466 AND Krt6a > 0 AND Perp <= 0	Fat
Rule1308	Fosl1 > 1 AND Tspan8 <= 2 AND Ckmt1 <= 8 AND Foxf1a > 10 AND Trp63 <= 0 AND Rnase1 <= 89 AND Hexb <= 466 AND Trim29 <= 0 AND Fxyd3 <= 0 AND Tcf7 <= 86 AND Ptprcap <= 0 AND Trem2 <= 0 AND Slc2a5 <= 0 AND Gpr34 <= 0 AND Prss32 <= 0 AND Chodl <= 94 AND Krt17 <= 0 AND Krt8 <= 2 AND P2ry12 <= 1 AND Oit1 <= 0 AND Cdh1 <= 0 AND Fosl1 <= 170 AND Mbp <= 4 AND Guca2a <= 0 AND Klk1 <= 0 AND Sfn <= 0 AND Tme…	Trachea
Rule1309	Fosl1 > 1 AND Tspan8 <= 2 AND Calml3 <= 1 AND Chodl > 3 AND Fam25c <= 0 AND Hexb <= 900 AND Foxf1a <= 11 AND Pigr <= 3 AND Cdh17 <= 19 AND Phgr1 <= 0 AND 2610528A11Rik <= 0 AND Tmem119 <= 214 AND 2210415F13Rik <= 0 AND Pigr <= 0 AND Ptprcap <= 2 AND Oit1 <= 0 AND Epcam <= 1 AND Pkp1 <= 0 AND Ccr9 <= 0 AND Fcrls <= 0 AND Krt5 <= 0 AND Lgmn <= 49 AND Epcam <= 0	Muscle
Rule1310	Fosl1 > 1 AND Tspan8 <= 2 AND Calml3 <= 1 AND Krt19 > 7 AND Lgals7 > 5 AND Krt5 <= 3	Muscle
Rule1311	Fosl1 > 1 AND Tspan8 <= 2 AND Calml3 <= 1 AND Krt19 > 6 AND Krt15 <= 4 AND Chga <= 0 AND Gpx2 <= 15 AND Tm4sf4 <= 2 AND Lgals4 <= 11 AND Fcrls <= 0 AND Trim29 <= 0 AND C1qc <= 0 AND Ins2 <= 0 AND Cdhr5 <= 4 AND Fam25c <= 22 AND Ccr9 <= 9 AND Col17a1 <= 0 AND C1qa <= 0 AND Coro1a <= 0 AND 2610528A11Rik <= 0 AND 2210415F13Rik <= 0 AND Lgals4 <= 0 AND Klk1 <= 0 AND Pitx1 <= 1 AND Krt15 > 0	Mammary
Rule1312	Fosl1 > 1 AND Tspan8 <= 2 AND Calml3 <= 1 AND Krt19 > 6 AND Cdh1 > 38 AND Oit1 <= 0	Lung
Rule1313	Fosl1 > 1 AND Tspan8 <= 2 AND Calml3 <= 1 AND Krt19 > 6 AND Tspan8 <= 0 AND Tmem45b <= 0 AND B4galnt2 <= 0 AND Krt5 <= 2 AND Tm4sf4 <= 2 AND Pax9 <= 0 AND Fcrls <= 0 AND Trim29 <= 0 AND C1qc <= 0 AND Ins2 <= 0 AND Dsp <= 0 AND Cdhr5 <= 4 AND Krt15 <= 1 AND Krt5 <= 0 AND Ccr9 <= 9 AND Krt15 <= 0 AND C1qa <= 0 AND Coro1a <= 0 AND 2610528A11Rik <= 0 AND 2210415F13Rik <= 0 AND Lgals4 <= 0 AND Klk1 <=…	Mammary
Rule1314	Fosl1 > 1 AND Tspan8 <= 2 AND Calml3 <= 1 AND Foxf1a <= 10 AND Krt19 > 6 AND Tspan8 <= 0 AND Tmem45b <= 0 AND B4galnt2 <= 0 AND Reg1 <= 0 AND Tm4sf4 <= 2 AND Ins2 <= 0 AND Fcrls <= 0 AND Trim29 <= 0 AND C1qc <= 0 AND Dsp <= 0 AND Cdhr5 <= 4 AND Krt15 <= 1 AND Krt5 <= 0 AND Ccr9 <= 9 AND Krt15 <= 0 AND C1qa <= 0 AND Coro1a <= 0 AND Krt8 > 0	Mammary
Rule1315	Fosl1 > 1 AND Lypd3 <= 3 AND Tspan8 <= 3 AND Fxyd3 <= 4 AND Krt19 > 7 AND Gpx2 <= 15 AND Chga <= 0 AND Anxa8 <= 8 AND Lgals4 <= 10 AND Fcrls <= 0 AND Trim29 <= 0 AND C1qc <= 0 AND Ckmt1 <= 2 AND Cdhr5 <= 4 AND Tmem119 <= 580	Mammary
Rule1316	Cd3e > 1 AND Cd3g <= 1 AND Cdhr5 <= 4 AND Ccr9 <= 1 AND Gc <= 0 AND Dmkn <= 0 AND Hexb <= 11 AND Rac2 <= 3 AND Mobp <= 0 AND Krt5 <= 0	Heart
Rule1317	Cd3e > 1 AND Cd3g > 1 AND Ins2 <= 0 AND Mobp > 0 AND Sfn <= 0 AND Krt5 <= 0 AND Lgmn <= 0 AND Hexb <= 79 AND Mbp > 2	Fat
Rule1318	Cd3e > 1 AND Cd3g > 1 AND Ins2 <= 0 AND Mobp > 0 AND P2ry12 <= 0 AND Rac2 > 813	Marrow
Rule1319	Cd3e > 1 AND Cd3g > 1 AND Ins2 <= 0 AND Coro1a > 125 AND Chga <= 0 AND Eps8l3 <= 0 AND Krt8 > 0 AND Siglech <= 0 AND Tmem119 <= 0 AND Cd8b1 <= 1702 AND Ttr <= 0 AND Tspan1 <= 0 AND Cldn3 <= 0 AND Gpr34 <= 13 AND Krt15 <= 0	Spleen
Rule1320	Fosl1 > 1 AND Lypd3 <= 3 AND Gpa33 <= 0 AND Tspan8 <= 2 AND Krt19 > 15 AND Pigr <= 22 AND Cdh1 <= 195 AND Oit1 <= 1 AND Cd79b <= 0	Fat
Rule1321	Fosl1 > 1 AND Lypd3 <= 3 AND Gpa33 <= 0 AND Tspan8 <= 2 AND Krt19 > 35 AND Lgals4 <= 279 AND Myb <= 4	Trachea
Rule1322	Fosl1 > 1 AND Tmem45b <= 4 AND Tspan8 <= 3 AND Calml3 <= 1 AND Foxf1a <= 10 AND Krt13 > 0 AND 2610528A11Rik <= 0 AND Ptprcap <= 1 AND Ccr9 <= 0 AND P2ry13 <= 0 AND Tmem119 > 50 AND Mbp <= 6	Fat
Rule1323	Fosl1 > 1 AND Tmem45b <= 4 AND Tspan8 <= 3 AND Calml3 <= 1 AND Foxf1a <= 10 AND Krt14 <= 21 AND Coro1a <= 22 AND P2ry12 > 0 AND Ttr <= 1 AND Cd3d <= 0 AND Tmem45b > 0 AND Krt8 <= 0	Mammary
Rule1324	Fosl1 > 1 AND Tmem45b <= 4 AND Tspan8 <= 3 AND Calml3 <= 1 AND Foxf1a <= 10 AND Krt14 <= 21 AND Coro1a <= 22 AND P2ry12 > 0 AND Ttr <= 1 AND Cd3d <= 0 AND Tmem45b <= 0 AND Fam25c <= 0 AND Cdhr5 <= 0 AND Pnlip <= 1 AND Trp63 <= 0 AND Mbp <= 635 AND Krt17 <= 3 AND Ckmt1 <= 0 AND Cd8a <= 0 AND Cd3g <= 0 AND Krt13 <= 1 AND Ccr9 <= 0 AND Ctsd <= 2401 AND Lgals7 <= 0 AND Cldn7 <= 0 AND Ins2 <= 1 AND Ra…	Muscle
Rule1325	Cd3e > 1 AND Cd3g > 1 AND Ins2 <= 0 AND Ccr9 > 1 AND Fam25c <= 0 AND Csf1r > 0 AND Rac2 > 21	Thymus
Rule1326	Fosl1 > 1 AND Tmem45b <= 4 AND Tspan8 <= 3 AND Calml3 <= 1 AND Coro1a > 22 AND C1qa > 119 AND Ccr9 <= 1 AND Hpgds <= 123	Muscle
Rule1327	Cd3e > 1 AND Cd3g > 1 AND Ins2 <= 0 AND Krt13 > 0 AND P2ry12 <= 0	Thymus
Rule1328	Cd3e > 1 AND Cd3g > 1 AND Ins2 <= 0 AND Tmem119 <= 1 AND Tmem45b > 0 AND Ctsd <= 1	Muscle
Rule1329	Cd3e > 1 AND Cd3g > 1 AND Ins2 <= 0 AND Tmem119 <= 1 AND Dmkn <= 0 AND Chga <= 0 AND Anxa8 > 0 AND Siglech <= 0	Muscle
Rule1330	Cd3e > 1 AND Cd3g > 1 AND Ins2 <= 0 AND Tmem119 <= 1 AND Dmkn <= 0 AND Chga <= 0 AND Krt5 <= 0 AND Cd79b > 5 AND Tmem119 > 0 AND Krt17 <= 0 AND Ctsd <= 184	Lung
Rule1331	Cd3e > 1 AND Cd3g > 1 AND Ins2 <= 0 AND Tmem119 <= 1 AND Dmkn <= 0 AND Chga <= 0 AND Krt5 <= 0 AND Pnlip <= 0 AND Cd79b > 3 AND Aqp3 <= 3 AND C1qa <= 0 AND Krt17 <= 0 AND Cd8b1 <= 874 AND C1qc <= 0 AND Krt19 <= 0 AND Krt15 <= 0 AND Hpgds <= 0 AND Hexb <= 29 AND Coro1a > 290	Spleen
Rule1332	Foxf1a > 1 AND Prss2 > 3 AND Anxa8 <= 0 AND Lgmn <= 155	Pancreas
Rule1333	Foxf1a > 1 AND Fosl1 <= 0 AND Pitx2 > 0 AND Ckmt1 <= 0 AND Cd8b1 <= 0 AND Hpgds <= 0 AND C1qa <= 0 AND Laptm5 <= 0 AND Ctsd <= 1466 AND Scel <= 2 AND Csf1r <= 1	Trachea
Rule1334	Fosl1 > 1 AND Tmem45b <= 4 AND Tspan8 <= 3 AND Calml3 <= 1 AND Coro1a > 37 AND Resp18 <= 0 AND Ptprcap <= 4 AND Sfn <= 10 AND Hexb > 0 AND Ptprcap <= 0 AND Dmkn <= 2 AND Krt13 <= 0 AND Capns2 <= 1 AND Krt6a <= 0 AND Krt5 <= 0 AND Rnase1 <= 0 AND Hexb > 42	Trachea
Rule1335	Fosl1 > 1 AND Tmem45b <= 4 AND Tspan8 <= 3 AND Calml3 <= 1 AND Coro1a > 22 AND Cldn7 <= 1 AND Ccr9 <= 1 AND Siglech <= 33 AND Chodl <= 3 AND Resp18 <= 0 AND Hexb > 0	Fat
Rule1336	Fosl1 > 1 AND Tmem45b <= 4 AND Calml3 > 4 AND Lgals7 <= 12 AND Dmkn <= 6	Trachea
Rule1337	Fosl1 > 1 AND Calml3 > 1 AND Lypd3 <= 0	Lung
Rule1338	Fosl1 > 1 AND Cldn7 <= 113 AND Lypd3 <= 3 AND Tspan8 <= 3 AND Fxyd3 > 6 AND Krt6a <= 0	Mammary
Rule1339	Fosl1 > 1 AND Cldn7 <= 113 AND Lypd3 <= 3 AND Tspan8 <= 3 AND Rac2 <= 9 AND Chodl > 12 AND Foxf1a <= 146 AND Mobp <= 0 AND Tmem119 <= 346 AND Phgr1 <= 1 AND Pkp1 <= 4 AND Dmbt1 <= 0 AND 2210415F13Rik <= 1 AND Cdh17 <= 19 AND Foxf1a <= 29 AND Lpcat2 <= 4 AND Epcam <= 80 AND Sfn <= 173 AND Ptprcap <= 2 AND Perp > 0	Muscle
Rule1340	Fosl1 > 1 AND Lgals4 > 45 AND Cela3b <= 9 AND C1qb <= 0 AND Chodl <= 0	Colon
Rule1341	Fosl1 > 1 AND Lypd3 <= 3 AND Tspan8 <= 3 AND Rac2 <= 9 AND Foxf1a > 0 AND Rnase1 <= 89 AND Hexb <= 466 AND Cd3g <= 0 AND Lgals7 <= 0 AND Trem2 > 0	Trachea
Rule1342	Fosl1 > 1 AND Lypd3 <= 3 AND Tspan8 <= 3 AND Rac2 <= 9 AND Trem2 > 0 AND Capns2 <= 0 AND Hexb <= 288 AND Anxa8 <= 0	Muscle
Rule1343	Fosl1 > 1 AND Lypd3 <= 3 AND Tspan8 <= 3 AND Rac2 <= 9 AND Foxf1a > 0 AND Rnase1 <= 89 AND Hexb <= 466 AND Trim29 <= 0 AND Slc2a5 <= 0 AND Fxyd3 <= 0 AND Tcf7 <= 94 AND Ptprcap <= 0 AND Rac2 <= 0 AND Guca2a <= 0 AND Chodl <= 131 AND Ins2 > 1	Trachea
Rule1344	Fosl1 > 1 AND Lypd3 <= 3 AND Tspan8 <= 3 AND Rac2 <= 9 AND Foxf1a <= 10 AND C1qc > 0 AND Ttr > 0 AND C1qc <= 1	Kidney
Rule1345	Fosl1 > 1 AND Tspan8 <= 3 AND Lypd3 <= 3 AND Rac2 <= 9 AND Foxf1a <= 10 AND Chodl > 49 AND Gpx2 <= 0 AND Perp <= 0 AND Krt5 <= 0 AND Ins2 <= 0 AND Fcrls <= 0 AND Ttr <= 0 AND Serpinb5 <= 0 AND Slc2a5 <= 0 AND C1qa <= 0 AND Krt17 <= 0 AND Csf1r <= 56 AND C1qc <= 0 AND Ckmt1 <= 0 AND Oit1 <= 0 AND Laptm5 <= 0 AND Coro1a <= 0 AND Chodl > 345 AND Lgmn <= 175	Trachea
Rule1346	Fosl1 > 1 AND Tspan8 <= 3 AND Lypd3 <= 3 AND Rac2 <= 9 AND Foxf1a <= 10 AND Chga > 0 AND Gpa33 <= 0 AND Krt14 <= 1 AND Tmem27 <= 0 AND Cela3b <= 0 AND Lgals4 > 2	Trachea
Rule1347	Fosl1 > 1 AND Tmem45b <= 4 AND Tspan8 <= 3 AND Lypd3 <= 3 AND Rac2 <= 9 AND Foxf1a <= 10 AND Asb5 > 1 AND Lgals7 <= 4 AND Cdx1 <= 0 AND Phgr1 <= 0 AND Cdh17 <= 19 AND 2210415F13Rik <= 1 AND Rac2 <= 2 AND Cd3d <= 0 AND Pitx1 <= 4 AND Ptprc <= 0 AND Lypd3 <= 0 AND Guca2a <= 0 AND Ctsd <= 876	Muscle
Rule1348	Foxf1a > 1 AND Pitx2 <= 0 AND Fosl1 <= 0 AND Fxyd3 > 1 AND Serpinb5 <= 0 AND C1qa <= 7 AND Krt19 <= 123 AND Foxf1a <= 789 AND Laptm5 <= 0	Trachea
Rule1349	Fosl1 > 1 AND Tmem45b <= 4 AND Tspan8 <= 3 AND Lypd3 <= 3 AND Pnlip > 0 AND Rac2 <= 23 AND Epcam <= 0 AND Gpr34 <= 0 AND Lgals4 <= 3 AND Klk1 <= 0 AND Pnlip <= 1	Trachea
Rule1350	Fosl1 > 1 AND Tmem45b <= 4 AND Tspan8 <= 3 AND Lypd3 <= 3 AND Rac2 <= 9 AND Foxf1a <= 10 AND Krt13 > 0 AND 2610528A11Rik <= 2 AND Ptprcap <= 1 AND Fcrls <= 0 AND Calm4 <= 0 AND Coro1a <= 0 AND Lgmn <= 139 AND Krt19 <= 0 AND Tcf7 <= 0	Muscle
Rule1351	Fosl1 > 1 AND Tmem45b <= 4 AND Tspan8 <= 3 AND Lypd3 <= 3 AND Rac2 <= 9 AND Foxf1a <= 10 AND Serpinb5 <= 0 AND Pnlip <= 0 AND C1qc > 0 AND Ttr <= 0 AND Gc <= 0 AND Klk10 <= 0 AND Calm4 <= 0 AND Fam25c <= 0 AND C1qc <= 16 AND Pitx1 <= 12 AND Krt15 <= 2 AND Csf1r <= 16 AND Krt6a <= 0 AND Sfn <= 12 AND Dsc3 <= 0 AND Gpr34 <= 0 AND Trim29 <= 0 AND Cd3g <= 0 AND Krt14 <= 1	Muscle
Rule1352	Cd3e > 1 AND Cd3g > 1 AND Ins2 <= 0 AND Tmem119 <= 1 AND Eps8l3 <= 0 AND Cd79b > 3 AND Krt17 <= 0 AND P2ry12 <= 0 AND Lgals4 <= 0 AND Ccr9 <= 0 AND Cd3g <= 389 AND Lgmn <= 53 AND Krt15 <= 0 AND Cd8b1 <= 448 AND Cd79b > 13	Marrow
Rule1353	Cd3e > 1 AND Cd3g > 1 AND Myb > 69 AND Cd8b1 <= 2 AND Ctsd > 278	Marrow
Rule1354	Cd3e > 1 AND Myb > 69 AND Aqp3 > 18 AND Krt15 > 0	Lung
Rule1355	Cd3e > 1 AND Myb > 69 AND Ptprc <= 704 AND Cd8b1 > 15 AND C1qc <= 0 AND Coro1a <= 529	Trachea
Rule1356	Cd3e > 1 AND Dmbt1 > 0 AND Krt5 <= 0 AND Ptprc <= 68 AND Tspan1 <= 0	Marrow
Rule1357	Cd3e > 1 AND Dmbt1 > 0 AND Krt5 <= 0 AND Ptprc > 58 AND Tcf7 <= 1387 AND Dmbt1 <= 1	Fat
Rule1358	Cd3e > 1 AND Dmbt1 > 0 AND Krt5 <= 0 AND Epcam > 3	Thymus
Rule1359	Cd3e > 1 AND Dmbt1 > 0 AND Krt5 <= 0 AND Tspan1 <= 0	Trachea
Rule1360	Cd3e > 1 AND Tmem119 > 2 AND Epcam <= 40 AND Mbp > 16	Liver
Rule1361	Cd3e > 1 AND Cd3g > 1 AND Slc2a5 > 0 AND Cd3d > 54 AND C1qc > 0	Spleen
Rule1362	Cd3e > 1 AND Cdh1 > 18 AND Krt8 <= 21	Brain Neurons
Rule1363	Cd3e > 1 AND Tmem119 > 2 AND Lgmn <= 0	Trachea
Rule1364	Cd3e > 1 AND Slc2a5 > 0 AND C1qc <= 1 AND Rac2 <= 3320	Fat
Rule1365	Cd3e > 1 AND Slc2a5 > 0 AND Hexb > 2	Lung
Rule1366	Cd3e > 1 AND Klk1 > 0 AND Krt17 <= 0 AND P2ry12 <= 0 AND Ptprc <= 182	Heart
Rule1367	Cd3e > 1 AND Cela2a > 0 AND Cd8a <= 253	Fat
Rule1368	Cd3e > 1 AND Ins2 <= 0 AND Tmem45b > 0 AND Krt14 <= 0	Fat
Rule1369	Cd3e > 1 AND Ins2 <= 0 AND Eps8l3 <= 0 AND Tmem119 <= 1 AND Aqp3 > 17 AND Ctsd <= 537	Fat
Rule1370	Cd3e > 1 AND Ins2 <= 0 AND Eps8l3 <= 0 AND Tmem119 <= 1 AND Cdh1 > 0 AND Tcf7 <= 6	Spleen
Rule1371	Cd3e > 1 AND Ins2 <= 0 AND Eps8l3 <= 0 AND Tmem119 <= 1 AND Myb > 168 AND Hexb <= 37	Thymus
Rule1372	Cd3e > 1 AND Ins2 <= 0 AND Eps8l3 <= 0 AND Tmem119 <= 1 AND Cldn7 > 0 AND Coro1a > 742	Spleen
Rule1373	Cd3e > 1 AND Dmkn <= 0 AND Krt15 > 1 AND Cd3d <= 98	Liver
Rule1374	Cd3e > 1 AND Tspan1 > 0 AND Dmkn <= 0 AND 2210415F13Rik <= 0 AND Ins2 <= 0 AND Cd3g > 128	Spleen
Rule1375	Cd3e > 1 AND Tspan1 > 0 AND Krt14 <= 0	Fat
Rule1376	Cd3e > 1 AND Hpgds > 23 AND Chga > 0	Lung
Rule1377	Cd3e > 1 AND Ins2 <= 1 AND Myb > 110 AND Ins2 <= 0	Spleen
Rule1378	Cd3e > 1 AND Ins2 <= 1 AND Dmkn <= 0 AND Tmem119 <= 1 AND Myb > 102 AND Ctsd <= 241 AND Rac2 <= 855	Trachea
Rule1379	Cd3e > 1 AND Ins2 <= 1 AND Dmkn <= 0 AND Tmem119 <= 1 AND Ccr9 > 2 AND Epcam <= 17 AND Cd8b1 > 1759 AND Krt8 <= 0	Lung
Rule1380	Cd3e > 1 AND Ins2 <= 1 AND Dmkn <= 0 AND Tmem119 <= 1 AND Krt5 <= 0 AND Coro1a > 170 AND Trem2 > 0 AND Hexb <= 1	Fat
Rule1381	Cd3e > 1 AND Ins2 <= 1 AND Dmkn <= 0 AND Tmem119 <= 1 AND Krt5 <= 0 AND Lgmn > 14 AND Ccr9 <= 33 AND Ptprcap <= 269	Fat
Rule1382	Cd3e > 1 AND Ins2 <= 1 AND Dmkn <= 0 AND Tmem119 <= 1 AND Sfn > 4 AND Epcam <= 17 AND Tcf7 > 170	Spleen
Rule1383	Cd3e > 1 AND Ins2 <= 1 AND Sfn > 4 AND Epcam <= 17	Marrow
Rule1384	Cd3e > 1 AND Ins2 <= 1 AND Dmkn <= 0 AND Tmem119 <= 1 AND Ptprc > 1998 AND Krt15 <= 0 AND Rac2 <= 5490	Marrow
Rule1385	Cd3e > 1 AND Ins2 <= 1 AND Dmkn <= 0 AND Tmem119 <= 1 AND Krt5 <= 0 AND Sfn <= 0 AND Coro1a > 160 AND Tcf7 > 40 AND Trp63 <= 0 AND Cdhr5 <= 0 AND C1qb > 1 AND Krt15 <= 0 AND Hexb > 0	Thymus
Rule1386	Cd3e > 1 AND Ins2 <= 1 AND Dmkn <= 0 AND Tmem119 <= 1 AND Krt5 <= 0 AND Sfn <= 0 AND Coro1a > 160 AND Tcf7 > 40 AND Trp63 <= 0 AND Cdhr5 <= 0 AND C1qb > 1 AND P2ry12 <= 0	Fat
Rule1387	Cd3e > 1 AND Ins2 <= 1 AND Dmkn <= 0 AND Tmem119 <= 1 AND Krt5 <= 0 AND Sfn <= 0 AND Coro1a > 160 AND Tcf7 > 40 AND Trp63 <= 0 AND Cdhr5 <= 0 AND C1qb <= 1 AND Siglech > 0 AND Cx3cr1 <= 0	Fat
Rule1388	Cd3e > 1 AND Ins2 <= 1 AND Dmkn <= 0 AND Tmem119 <= 1 AND Krt5 <= 0 AND Siglech > 0 AND Laptm5 > 538	Thymus
Rule1389	Cd3e > 1 AND Ins2 <= 1 AND Dmkn <= 0 AND Tmem119 <= 1 AND Krt5 <= 0 AND Sfn <= 0 AND Coro1a > 160 AND Tcf7 > 40 AND Trp63 <= 0 AND Cdhr5 <= 0 AND Cd3e <= 194 AND Chga <= 0 AND Pnlip <= 0 AND Cd79b > 0 AND Mbp <= 39 AND Krt15 <= 0 AND 2210415F13Rik <= 0	Spleen
Rule1390	Cd3e > 1 AND Ins2 <= 1 AND Dmkn <= 0 AND Tmem119 <= 1 AND Krt5 <= 0 AND Sfn <= 0 AND Coro1a > 160 AND Tcf7 > 40 AND Trp63 <= 0 AND Cdhr5 <= 0 AND Cd3e <= 194 AND Chga <= 0 AND Cd79b > 0 AND Cd3d > 108	Fat
Rule1391	Cd3e > 1 AND Ins2 <= 1 AND Dmkn <= 0 AND Tmem119 <= 1 AND Krt5 <= 0 AND Coro1a > 160 AND Sfn > 0 AND Krt14 <= 0 AND Ctsd <= 147	Spleen
Rule1392	Cd3e > 1 AND Ins2 <= 1 AND Dmkn <= 0 AND Tmem119 <= 1 AND Sfn <= 0 AND Mobp > 0 AND Krt15 <= 0	Spleen
Rule1393	Cd3e > 1 AND Ins2 <= 1 AND Mobp > 0 AND Hexb <= 0	Fat
Rule1394	Cd3e > 1 AND Ins2 <= 1 AND Dmkn <= 0 AND Tmem119 <= 1 AND Sfn <= 0 AND Krt5 <= 0 AND Coro1a > 160 AND Tcf7 > 41 AND Trp63 <= 0 AND Cdhr5 <= 0 AND C1qb <= 1 AND Chga > 0 AND Ptprcap <= 334 AND Mbp <= 25	Thymus
Rule1395	Cd3e > 1 AND Ins2 <= 1 AND Dmkn <= 0 AND Tmem119 <= 1 AND Sfn <= 0 AND Krt5 <= 0 AND Coro1a > 160 AND Tcf7 > 41 AND Trp63 <= 0 AND Cdhr5 <= 0 AND C1qb <= 1 AND Pnlip <= 0 AND Resp18 <= 0 AND Chga > 0 AND Mbp <= 32	Spleen
Rule1396	Cd3e > 1 AND Ins2 <= 1 AND Dmkn <= 0 AND Tmem119 <= 1 AND Sfn <= 0 AND Krt5 <= 0 AND Coro1a > 160 AND Tcf7 > 40 AND Trp63 <= 0 AND Cd79b <= 122 AND Chga > 0 AND Ptprcap <= 102	Fat
Rule1397	Cd3e > 1 AND Ins2 <= 1 AND Dmkn <= 0 AND Tmem119 <= 1 AND Sfn <= 0 AND Krt5 <= 0 AND Coro1a > 160 AND Cd3e <= 221 AND Siglech <= 0 AND Trem2 <= 0 AND P2ry12 <= 1 AND C1qa > 1	Spleen
Rule1398	Cd3e > 1 AND Ins2 <= 1 AND Dmkn <= 0 AND Tmem119 <= 1 AND Sfn <= 0 AND Krt5 <= 0 AND Coro1a > 160 AND Siglech <= 0 AND Trem2 <= 0 AND Tcf7 > 41 AND Chga <= 0 AND Trp63 <= 0 AND Cd79b <= 122 AND Pnlip <= 0 AND Cd3e <= 194 AND Cldn3 > 0 AND 2210415F13Rik <= 0	Fat
Rule1399	Cd3e > 1 AND Ins2 <= 1 AND Dmkn <= 0 AND Tmem119 <= 1 AND Sfn <= 0 AND Krt5 <= 0 AND Coro1a > 160 AND Siglech <= 0 AND Trem2 <= 0 AND Perp > 0 AND Ptprc <= 429	Fat
Rule1400	Cd3e > 1 AND Ins2 <= 1 AND Dmkn <= 0 AND Tmem119 <= 1 AND Sfn <= 0 AND Krt5 <= 0 AND Coro1a > 160 AND Siglech <= 0 AND Trem2 <= 0 AND Tcf7 > 40 AND Chga <= 0 AND Trp63 <= 0 AND Cd79b <= 122 AND Cd3e <= 194 AND Pnlip <= 0 AND Cx3cr1 <= 0 AND Ins2 > 0 AND Lgals4 <= 0 AND Mbp <= 120 AND Cd3e > 10 AND Ctsd <= 614	Spleen
Rule1401	Cd3e > 1 AND Ins2 <= 0 AND Tmem119 <= 1 AND Dmkn <= 0 AND Chga <= 0 AND Krt5 <= 0 AND Pnlip <= 0 AND Sfn > 0 AND Ccr9 <= 36 AND Krt17 <= 1 AND Rac2 <= 530	Muscle
Rule1402	Cd3e > 1 AND Ins2 <= 0 AND Tmem119 <= 1 AND Dmkn <= 0 AND Chga <= 0 AND Krt5 <= 0 AND Trp63 <= 0 AND Trem2 <= 0 AND Pnlip <= 0 AND P2ry12 <= 1 AND Krt8 > 0 AND Ptprc <= 364	Spleen
Rule1403	Cd3e > 1 AND Ins2 <= 0 AND Tmem119 <= 1 AND Dmkn <= 0 AND Chga <= 0 AND Krt5 <= 0 AND Trp63 <= 0 AND Pnlip <= 0 AND P2ry12 <= 1 AND Krt8 > 0 AND Cd3e <= 102	Thymus
Rule1404	Cd3e > 1 AND Ins2 <= 0 AND Tmem119 <= 1 AND Dmkn <= 0 AND Sfn > 0 AND Cd3d <= 189	Spleen
Rule1405	Cd3e > 1 AND Ins2 <= 0 AND Sfn > 0 AND Fcrls <= 0 AND Cd3d <= 255	Fat
Rule1406	Cd3e > 1 AND Ins2 <= 0 AND Sfn > 0 AND Hexb <= 24	Kidney
Rule1407	Cd3e > 1 AND Ins2 <= 0 AND Krt8 > 0 AND Tmem45b <= 0	Spleen
Rule1408	Cd3e > 1 AND Ins2 <= 0 AND Dmkn <= 0 AND Krt5 <= 0 AND Cd79b > 5 AND C1qb <= 0 AND Cd3e > 15	Thymus
Rule1409	Cd3e > 1 AND Cd79b > 273 AND C1qb <= 0 AND Hexb <= 59	Lung
Rule1410	Cd3e > 1 AND Ins2 <= 0 AND Dmkn <= 0 AND Coro1a > 134 AND Chga > 0 AND Hpgds <= 0 AND Ccr9 <= 3 AND Ptprcap > 35	Liver
Rule1411	Cd3e > 1 AND Ins2 <= 0 AND Dmkn <= 0 AND Cdh17 <= 0 AND Krt5 <= 0 AND Coro1a > 134 AND Mbp <= 5 AND Trem2 <= 0 AND Trp63 <= 0 AND P2ry12 <= 1 AND Krt14 <= 1 AND Cx3cr1 <= 0 AND Cd3e <= 221 AND Hpgds <= 5 AND C1qb <= 0 AND Csf1r > 0 AND C1qc <= 0	Spleen
Rule1412	Cd3e > 1 AND Ins2 <= 0 AND Krt8 <= 0 AND Trim29 > 0 AND Krt5 <= 0	Muscle
Rule1413	Cd3e > 1 AND Ins2 <= 0 AND Krt8 <= 0 AND Trim29 <= 0 AND Cdh17 <= 0 AND Csf1r <= 0 AND Trp63 <= 0 AND Cd8b1 > 1407 AND Ctsd > 1	Fat
Rule1414	Cd3e > 1 AND Ins2 <= 0 AND Krt8 <= 0 AND Trim29 <= 0 AND Tmem119 > 1 AND P2ry12 <= 0	Lung
Rule1415	Cd3e > 1 AND Ins2 <= 0 AND Krt8 <= 0 AND Trim29 <= 0 AND Cdh17 <= 0 AND Csf1r <= 0 AND Trp63 <= 0 AND Coro1a <= 139 AND C1qc <= 0 AND Tmem119 <= 0 AND Krt15 <= 0 AND Cd79b <= 3 AND Hexb > 0	Muscle
Rule1416	Cd3e > 1 AND Ins2 <= 0 AND Krt8 <= 0 AND Trim29 <= 0 AND Cdh17 <= 0 AND Csf1r <= 0 AND Trp63 <= 0 AND Krt5 <= 0 AND Pnlip <= 0 AND Cd79b > 5 AND Ctsd <= 13	Fat
Rule1417	Cd3e > 1 AND Ins2 <= 0 AND Krt8 <= 0 AND Trim29 <= 0 AND Cdh17 <= 0 AND Csf1r <= 0 AND Cd79b <= 155 AND Trp63 <= 0 AND Krt5 <= 0 AND Pnlip <= 0 AND Lpcat2 > 0 AND C1qc <= 0	Fat
Rule1418	Cd3e > 1 AND Ins2 <= 0 AND Krt8 <= 0 AND Trim29 <= 0 AND Cdh17 <= 0 AND Csf1r <= 0 AND Cd79b <= 155 AND Trp63 <= 0 AND Lpcat2 <= 0 AND Coro1a <= 40 AND C1qc <= 0 AND Myb <= 0	Thymus
Rule1419	Cd3e > 1 AND Ins2 <= 0 AND Krt8 <= 0 AND Trim29 <= 0 AND Cdh17 <= 0 AND Csf1r <= 0 AND Cd79b <= 155 AND Lpcat2 <= 0 AND Trp63 > 0	Marrow
Rule1420	Cd3e > 1 AND Ins2 <= 0 AND Krt8 <= 0 AND Trim29 <= 0 AND Cdh17 <= 0 AND Csf1r <= 0 AND Cd79b <= 155 AND Lpcat2 > 0	Thymus
Rule1421	Cd3e > 1 AND Ins2 <= 0 AND Krt8 <= 0 AND Trim29 <= 0 AND Tmem119 <= 1 AND Cdh17 <= 0 AND Cd79b > 155	Marrow
Rule1422	Cd3e > 1 AND Ins2 <= 0 AND Krt8 <= 0 AND Trim29 <= 0 AND Cdh17 <= 0 AND Csf1r <= 0 AND Krt5 <= 0 AND Mbp <= 71 AND Coro1a <= 37 AND C1qc <= 0	Lung
Rule1423	Cd3e > 1 AND Ins2 <= 0 AND Krt8 <= 0 AND Trim29 <= 0 AND Cdh17 <= 0 AND Csf1r <= 0 AND Krt5 <= 0 AND Mbp <= 71 AND Lgmn <= 1 AND C1qb > 0 AND Lgmn <= 0 AND Krt15 <= 0 AND Cd3e <= 234 AND Tmem119 <= 0 AND P2ry12 <= 0	Spleen
Rule1424	Fosl1 > 1 AND Tmem45b <= 4 AND Tspan8 <= 3 AND Lypd3 <= 3 AND Rac2 <= 9 AND Krt13 > 0 AND Klk10 <= 0 AND Ccr9 <= 0 AND Cldn7 <= 0 AND Krt19 <= 0 AND Krt5 <= 3 AND Foxf1a <= 9	Fat
Rule1425	Fosl1 > 1 AND Tmem45b <= 4 AND Tspan8 <= 3 AND Lypd3 <= 3 AND Rac2 <= 9 AND Foxf1a <= 10 AND Pnlip > 0	Fat
Rule1426	Fosl1 > 1 AND Tmem45b <= 4 AND Tspan8 <= 3 AND Lypd3 <= 3 AND Rac2 <= 9 AND Krt14 <= 20 AND Foxf1a <= 10 AND Fcrls <= 0 AND Ccr9 > 0 AND Krt13 <= 0 AND Cldn7 <= 0 AND Krt14 <= 0	Fat
Rule1427	Fosl1 > 1 AND Tmem45b <= 4 AND Tspan8 <= 3 AND Lypd3 <= 3 AND Rac2 <= 4 AND Foxf1a <= 10 AND Serpinb5 <= 0 AND Lgals7 > 0 AND Krt13 <= 0 AND Epcam > 0 AND Perp <= 0	Mammary
Rule1428	Fosl1 > 1 AND Tmem45b <= 4 AND Tspan8 <= 3 AND Lypd3 <= 3 AND Rac2 <= 4 AND Foxf1a <= 10 AND Lgals7 > 0 AND Fxyd3 <= 7 AND Cx3cr1 <= 2 AND Krt8 <= 0 AND Cd79b <= 0 AND Krt15 <= 8 AND Klk1 <= 0 AND Perp <= 24 AND Rac2 <= 0 AND Krt5 > 0	Fat
Rule1429	Fosl1 > 1 AND Krt6a > 10 AND Lgals4 <= 0 AND P2ry13 <= 283 AND C1qa <= 0	Tongue
Rule1430	Fosl1 > 1 AND Tmem45b <= 4 AND Tspan8 <= 3 AND Rac2 <= 4 AND Foxf1a <= 10 AND Cldn7 > 5 AND Oit1 <= 0 AND Lypd3 <= 2 AND Lgals4 <= 0 AND Cldn7 <= 14	Trachea
Rule1431	Fosl1 > 1 AND Tmem45b <= 4 AND Tspan8 <= 3 AND Rac2 <= 4 AND Foxf1a <= 10 AND Fcrls > 0 AND Trim29 <= 0 AND Eps8l3 <= 0 AND Calm4 <= 0 AND Lgals4 <= 0 AND Krt6a <= 0 AND Dsc3 <= 0 AND Fosl1 > 5 AND Sfn <= 161 AND Lgals7 <= 0 AND Krt5 <= 0 AND Pitx1 <= 8 AND Cldn7 <= 0 AND Krt8 <= 589 AND C1qb > 0	Muscle
Rule1432	Fosl1 > 1 AND Tmem45b <= 4 AND Tspan8 <= 3 AND Rac2 <= 4 AND Foxf1a <= 10 AND Hpgds > 0 AND Krt17 <= 0 AND Prss2 <= 0 AND Tmem45b <= 0 AND Epcam <= 0 AND Pax9 <= 31 AND Fcrls <= 0	Fat
Rule1433	Fosl1 > 1 AND Tmem45b <= 4 AND Tspan8 <= 3 AND Rac2 <= 4 AND Foxf1a <= 10 AND Fcrls <= 0 AND Resp18 <= 0 AND B4galnt2 <= 0 AND Trim29 <= 5 AND P2ry12 <= 0 AND Krt17 > 0 AND Fxyd3 <= 11 AND Cx3cr1 <= 0 AND Cdh17 <= 0 AND Cldn3 <= 2 AND Foxf1a <= 0 AND Ptprcap <= 1 AND Pkp1 <= 0 AND Chodl <= 17 AND Krt6a <= 0 AND Hexb <= 324 AND Pcsk1n <= 0 AND Mbp <= 5 AND C1qc <= 0 AND Fosl1 > 3 AND Cdhr5 <= 0 AN…	Mammary
Rule1434	Fosl1 > 1 AND Tmem45b <= 4 AND Tspan8 <= 3 AND Rac2 <= 4 AND Foxf1a <= 10 AND Fcrls <= 0 AND Resp18 <= 0 AND B4galnt2 <= 0 AND Trim29 > 5	Muscle
Rule1435	Fosl1 > 1 AND Sfn > 470 AND Tm4sf4 <= 1709 AND Cldn3 <= 179	Bladder
Rule1436	Fosl1 > 1 AND Tmem45b <= 4 AND Tspan8 <= 3 AND Rac2 <= 4 AND Krt14 <= 10 AND Resp18 <= 0 AND Foxf1a <= 10 AND Fcrls <= 0 AND B4galnt2 <= 0 AND Ctrb1 > 0 AND Ttr <= 0 AND Cela3b <= 0	Trachea
Rule1437	Fosl1 > 1 AND Tmem45b <= 4 AND Tspan8 <= 3 AND Rac2 <= 4 AND Krt14 <= 10 AND Resp18 <= 0 AND Foxf1a <= 10 AND Fcrls <= 0 AND B4galnt2 <= 0 AND Lypd3 > 0 AND Cldn3 <= 2 AND C1qc <= 0 AND Ptprcap <= 0 AND C1qb <= 0	Mammary
Rule1438	Fosl1 > 1 AND Tmem45b <= 4 AND Tspan8 <= 3 AND Lypd3 <= 0 AND Resp18 <= 0 AND Rac2 <= 4 AND Foxf1a <= 10 AND Fcrls <= 0 AND B4galnt2 <= 0 AND P2ry12 > 0 AND Cd3d <= 0 AND Fam25c <= 0 AND Ckmt1 <= 0 AND Krt19 > 0 AND Sfn <= 0	Mammary
Rule1439	Fosl1 > 1 AND Tmem45b <= 4 AND Tspan8 <= 3 AND Lypd3 <= 0 AND Resp18 <= 0 AND Rac2 <= 4 AND Foxf1a <= 10 AND Fcrls <= 0 AND B4galnt2 <= 0 AND P2ry12 > 0 AND Cd3d <= 0 AND Krt19 <= 0 AND Fam25c <= 0 AND Krt8 <= 0 AND Mobp <= 0 AND Cd3g <= 0 AND Tmem119 <= 71 AND Laptm5 <= 0 AND Lgals4 <= 1 AND Csf1r <= 0 AND C1qa <= 0 AND Krt17 > 0	Muscle
Rule1440	Fosl1 > 1 AND Tmem45b <= 4 AND Tspan8 <= 3 AND Krt14 <= 10 AND Resp18 <= 0 AND Rac2 <= 4 AND Foxf1a <= 10 AND Fcrls <= 0 AND B4galnt2 <= 0 AND Lypd3 <= 0 AND P2ry12 <= 0 AND Ins2 > 0 AND Cdh1 <= 0 AND Krt15 > 1 AND Perp <= 0	Mammary
Rule1441	Fosl1 > 1 AND Tmem45b <= 4 AND Tspan8 <= 3 AND Krt14 <= 10 AND Resp18 <= 0 AND Rac2 <= 4 AND Ins2 > 0 AND Foxf1a > 85	Lung
Rule1442	Fosl1 > 1 AND Tmem45b <= 4 AND Tspan8 <= 3 AND Krt14 <= 10 AND Resp18 <= 0 AND Coro1a <= 60 AND Ins2 > 0 AND Mobp > 0 AND Fosl1 <= 34	Heart
Rule1443	Fosl1 > 1 AND Tmem45b <= 4 AND Tspan8 <= 3 AND Krt14 <= 10 AND Resp18 <= 0 AND Coro1a <= 60 AND Ins2 > 0 AND Reg1 <= 0 AND Krt14 <= 1 AND Siglech <= 0 AND Cdx1 <= 0 AND P2ry13 <= 0 AND Eps8l3 <= 0 AND Tmem27 <= 0 AND Krt15 > 0 AND Fosl1 <= 68	Fat
Rule1444	Fosl1 > 1 AND Tmem45b <= 4 AND Tspan8 <= 3 AND Krt14 <= 10 AND Resp18 <= 0 AND Coro1a <= 60 AND Ins2 > 0 AND Reg1 <= 0 AND Krt14 <= 1 AND Eps8l3 <= 0 AND Siglech <= 0 AND Cdx1 <= 0 AND P2ry13 <= 0 AND Tmem27 <= 0 AND Dmkn <= 6 AND Chodl > 31	Muscle
Rule1445	Fosl1 > 1 AND Tmem45b <= 4 AND Coro1a <= 60 AND Tspan8 <= 3 AND Krt14 <= 10 AND Resp18 <= 0 AND Ins2 > 0 AND Chodl <= 0 AND Cdh1 <= 0 AND Reg1 <= 0 AND Eps8l3 <= 0 AND Tspan8 <= 0 AND P2ry13 <= 0 AND Tmem27 <= 0 AND Epcam <= 0 AND Krt14 <= 1 AND Dmkn > 6	Muscle
Rule1446	Fosl1 > 1 AND Tmem45b <= 4 AND Coro1a <= 60 AND Tspan8 <= 3 AND Krt14 <= 10 AND Resp18 <= 0 AND Ins2 > 0 AND Chodl <= 0 AND Cdh1 <= 0 AND Reg1 <= 0 AND Eps8l3 <= 0 AND Epcam > 0	Fat
Rule1447	Fosl1 > 1 AND Tmem45b <= 4 AND Tspan8 <= 3 AND Krt14 <= 10 AND Resp18 <= 0 AND Coro1a <= 60 AND Ins2 > 0 AND Chodl <= 0 AND Cdh1 <= 0 AND Eps8l3 <= 0 AND Reg1 <= 0 AND P2ry13 <= 0 AND Krt14 <= 1 AND P2ry12 <= 0 AND Hpgds <= 5 AND Ctrl <= 0 AND Cldn3 <= 34 AND C1qb > 0 AND Fosl1 <= 78	Muscle
Rule1448	Fosl1 > 1 AND Tmem45b <= 4 AND Tspan8 <= 3 AND Krt14 <= 10 AND Resp18 <= 0 AND Coro1a <= 60 AND Ins2 > 0 AND Chodl <= 0 AND Cdh1 <= 0 AND Reg1 <= 0 AND Eps8l3 <= 0 AND P2ry13 <= 0 AND Krt14 <= 1 AND P2ry12 <= 0 AND Hpgds <= 5 AND Ctrl <= 0 AND Cldn3 <= 34 AND Cela3b <= 1 AND Krt19 <= 0 AND Lgmn > 2 AND Lgmn <= 277 AND Krt5 <= 0 AND Ptprc <= 0 AND Col17a1 <= 1 AND Lgmn > 5	Trachea
Rule1449	Fosl1 > 1 AND Tmem45b <= 4 AND Tspan8 <= 3 AND Krt14 <= 10 AND Resp18 <= 0 AND Coro1a <= 60 AND Foxf1a <= 10 AND Ins2 > 0 AND Cdh1 <= 0 AND Reg1 <= 0 AND Krt14 > 1 AND Krt15 > 0	Trachea
Rule1450	Fosl1 > 1 AND Tmem45b <= 4 AND Tspan8 <= 3 AND Krt14 <= 10 AND Resp18 <= 0 AND Coro1a <= 60 AND Foxf1a <= 10 AND Ins2 > 0 AND Krt14 <= 1 AND Reg1 <= 0 AND Eps8l3 <= 0 AND P2ry13 <= 0 AND Lgmn > 108 AND Sfn <= 22	Fat
Rule1451	Fosl1 > 1 AND Tmem45b <= 4 AND Coro1a <= 60 AND Tspan8 <= 3 AND Krt14 <= 10 AND Resp18 <= 0 AND Ctsd <= 2185 AND Fcrls <= 0 AND Serpinb5 <= 0 AND Ins2 > 0 AND Krt14 <= 1 AND Chodl <= 0 AND Reg1 <= 0 AND Pax9 <= 29 AND Ctrl <= 0 AND P2ry12 > 0	Muscle
Rule1452	Fosl1 > 1 AND Tmem45b <= 4 AND Coro1a <= 60 AND Tspan8 <= 3 AND Resp18 <= 0 AND Lypd3 > 1 AND P2ry12 <= 0 AND Serpinb5 <= 3	Brain Neurons
Rule1453	Fosl1 > 1 AND Tmem45b <= 4 AND Coro1a <= 60 AND Tspan8 <= 3 AND Krt14 > 20 AND Krt6a <= 1 AND C1qa <= 0 AND Krt15 <= 1	Mammary
Rule1454	Fosl1 > 1 AND Tmem45b <= 4 AND Coro1a <= 60 AND Tspan8 <= 2 AND Krt14 > 20 AND Lgals7 <= 2 AND Krt8 <= 1	Trachea
Rule1455	Fosl1 > 1 AND Tmem45b <= 4 AND Coro1a <= 60 AND Tspan8 <= 2 AND Krt14 <= 10 AND Resp18 <= 0 AND Foxf1a <= 10 AND Fcrls <= 0 AND B4galnt2 <= 0 AND Ttr <= 0 AND Prss32 > 0 AND Hexb <= 407	Mammary
Rule1456	Fosl1 > 1 AND Tmem45b <= 4 AND Coro1a <= 60 AND Tspan8 <= 2 AND Krt14 <= 10 AND Resp18 <= 0 AND Foxf1a <= 10 AND Fcrls <= 0 AND B4galnt2 <= 0 AND Ttr <= 0 AND Ins2 > 0 AND Krt14 <= 1 AND Reg1 <= 0 AND Eps8l3 <= 0 AND Pax9 <= 29 AND Ctrl <= 0 AND Gpr34 <= 0 AND Try4 <= 0 AND Chga > 1 AND Ins2 > 8	Trachea
Rule1457	Fosl1 > 1 AND Tmem45b <= 4 AND Coro1a <= 60 AND Tspan8 <= 2 AND Krt14 <= 10 AND Resp18 <= 0 AND Foxf1a <= 10 AND Fcrls <= 0 AND B4galnt2 <= 0 AND Ttr <= 0 AND Ins2 > 0 AND Krt14 <= 1 AND Reg1 <= 0 AND Eps8l3 <= 0 AND Csf1r <= 0 AND Chga <= 1 AND Gpr34 <= 0 AND Try4 <= 0 AND Pax9 <= 29 AND Lgals7 <= 0 AND Anxa8 <= 88 AND Tm4sf4 <= 0 AND Prss2 <= 0 AND Cela2a <= 0 AND Foxf1a <= 0 AND Pitx2 <= 3 AND…	Muscle
Rule1458	Fosl1 > 1 AND Tmem45b <= 4 AND Coro1a <= 60 AND Tspan8 <= 2 AND Krt14 <= 10 AND Resp18 <= 0 AND Foxf1a <= 10 AND Ins2 > 0 AND Krt14 <= 1 AND Reg1 <= 0 AND Eps8l3 <= 0 AND Csf1r <= 0 AND Pax9 <= 29 AND Ctrl <= 0 AND Chga <= 1 AND Gpr34 <= 0 AND Try4 <= 0 AND Ttr <= 0 AND Mbp > 0 AND Fosl1 > 16	Muscle
Rule1459	Fosl1 > 1 AND Tmem45b <= 4 AND Coro1a <= 60 AND Tspan8 <= 2 AND Krt14 <= 10 AND Resp18 <= 0 AND Foxf1a <= 10 AND Ins2 > 0 AND Krt14 <= 1 AND Reg1 <= 0 AND Eps8l3 <= 0 AND Csf1r <= 0 AND Pax9 <= 29 AND Ctrl <= 0 AND Chga <= 1 AND Gpr34 <= 0 AND Try4 <= 0 AND Ttr <= 0 AND Hexb <= 13	Trachea
Rule1460	Fosl1 > 1 AND Tmem45b <= 4 AND Coro1a <= 60 AND Tspan8 <= 2 AND Krt14 <= 10 AND Resp18 <= 0 AND Foxf1a <= 10 AND Fcrls <= 0 AND B4galnt2 <= 0 AND Ttr <= 0 AND Ins2 > 0 AND Krt14 <= 1 AND Reg1 <= 0 AND Eps8l3 <= 0 AND Csf1r <= 0 AND Pax9 <= 29 AND Ctrl <= 0 AND Chga <= 1 AND Prss2 <= 0 AND Gpr34 <= 0 AND Coro1a <= 1 AND Hexb > 59 AND Tmem119 > 1	Trachea
Rule1461	Foxf1a > 1 AND Pitx2 <= 0 AND Fosl1 <= 0 AND Pax9 > 0 AND Krt6a <= 1 AND Col17a1 <= 10 AND C1qc <= 0	Trachea
Rule1462	Gpx2 > 3 AND Tm4sf4 > 51	Pancreas
Rule1463	Gpx2 > 3 AND Ptprcap > 0 AND Cdx1 > 0	Mammary
Rule1464	Gpx2 > 3 AND Tfap2b <= 2 AND Asb5 <= 0 AND Gpa33 > 6	Colon
Rule1465	Gpx2 > 3 AND Tfap2b <= 2 AND Asb5 <= 0 AND Lypd3 <= 0 AND Sycn > 1 AND Serpinb5 <= 0	Colon
Rule1466	Gpx2 > 3 AND Lgals7 <= 30 AND Sycn > 3 AND Pcsk1n <= 0	Muscle
Rule1467	Gpx2 > 4 AND Krt6a <= 49 AND Lypd3 <= 2 AND Lgals4 <= 49 AND Tmem45b <= 0 AND Phgr1 <= 1 AND Cldn3 > 1161 AND Hexb <= 269	Lung
Rule1468	Gpx2 > 4 AND Calm4 <= 9 AND Tfap2b <= 2 AND Lgals4 > 40 AND Lypd3 <= 2	Colon
Rule1469	Gpx2 > 4 AND Calm4 <= 9 AND Gm5485 <= 0 AND Lypd3 <= 74 AND Klk1 > 13 AND Hexb <= 0	Colon
Rule1470	Gpx2 > 4 AND Tmem45b <= 1 AND Lypd3 <= 15 AND Cdx1 <= 1 AND Prss32 <= 5 AND Krt13 <= 10 AND Crybb1 <= 0 AND 2210415F13Rik <= 92 AND Trem2 <= 0 AND Cela3b <= 0 AND Dmkn <= 166 AND Cd79b <= 16 AND Krt17 <= 956 AND Myb <= 59 AND Cpa1 <= 0 AND Clps <= 0 AND Tmem119 <= 171 AND Guca2a <= 1 AND Cd8a <= 0 AND Asb5 <= 0 AND Phgr1 <= 0 AND Mobp <= 0 AND P2ry12 <= 1 AND Cd8b1 <= 0 AND Abcc8 <= 5 AND 1190003…	Trachea
Rule1471	Fosl1 > 1 AND Tmem45b > 1 AND P2ry12 <= 1711 AND Hexb <= 4 AND Lpcat2 > 1	Kidney
Rule1472	Fosl1 > 1 AND S100a14 <= 1 AND Tspan8 <= 3 AND Rac2 <= 10 AND Resp18 <= 0 AND Krt14 <= 10 AND Foxf1a <= 10 AND Ins2 > 0 AND Krt14 <= 1 AND Tcf7 <= 44 AND Reg1 <= 0 AND Siglech <= 0 AND Pigr <= 0 AND 2210415F13Rik <= 0 AND Csf1r <= 0 AND Ctsd > 283	Muscle
Rule1473	Fosl1 > 1 AND S100a14 <= 1 AND Tspan8 <= 3 AND Ins2 <= 0 AND Rac2 > 119 AND Krt14 <= 0 AND Lgals4 <= 0 AND C1qb > 0	Muscle
Rule1474	Fosl1 > 1 AND Coro1a <= 60 AND Tspan8 <= 3 AND Fxyd3 > 1 AND Lgals7 <= 1 AND Krt6a > 0	Fat
Rule1475	Fosl1 > 1 AND Coro1a <= 60 AND Tspan8 <= 3 AND Resp18 <= 0 AND Ins2 > 0 AND Krt14 <= 1 AND Reg1 <= 0 AND Chodl <= 0 AND Klk1 <= 0 AND Foxf1a <= 20 AND Tcf7 <= 44	Fat
Rule1476	Fosl1 > 1 AND Coro1a <= 60 AND Tspan8 <= 3 AND Resp18 <= 0 AND Krt15 <= 5 AND Ins2 <= 0 AND Foxf1a <= 10 AND Fcrls <= 0 AND B4galnt2 <= 0 AND Ttr <= 0 AND P2ry12 <= 0 AND Mbp > 2 AND Krt19 <= 0 AND Pigr <= 0 AND Them5 <= 0 AND Cldn7 <= 2 AND Cd8b1 <= 44 AND Krt8 <= 0 AND Dmkn > 0	Fat
Rule1477	Fosl1 > 1 AND Coro1a <= 60 AND Tspan8 <= 3 AND Cldn7 <= 5 AND Krt14 <= 8 AND Ins2 <= 0 AND Ctsd <= 2185 AND Fcrls <= 0 AND P2ry13 <= 0 AND Cd79b > 0 AND Coro1a <= 2 AND Ttr <= 0 AND P2ry12 <= 0 AND Dmkn <= 18 AND Tcf7 <= 28 AND Ptprc <= 0 AND B4galnt2 <= 0 AND Hexb <= 407 AND Krt6a <= 0 AND Foxf1a <= 7 AND Phgr1 <= 0	Mammary
Rule1478	Fosl1 > 1 AND Coro1a <= 60 AND Tspan8 <= 3 AND Cldn7 <= 5 AND Krt14 <= 8 AND Ctsd <= 3114 AND Rnase1 > 0 AND Krt5 <= 0	Muscle
Rule1479	Fosl1 > 1 AND Coro1a <= 60 AND Tspan8 <= 3 AND Resp18 > 0 AND Cdh1 <= 0 AND Cx3cr1 <= 0 AND Ttr <= 0 AND Cela2a <= 0 AND Fosl1 > 8	Trachea
Rule1480	Fosl1 > 1 AND Coro1a <= 60 AND Tspan8 <= 3 AND Resp18 > 0 AND Cdh1 <= 0 AND Foxf1a <= 0	Fat
Rule1481	Fosl1 > 1 AND Coro1a <= 60 AND Tspan8 <= 3 AND Ins2 <= 0 AND Cldn7 <= 5 AND Krt14 <= 8 AND Ctsd <= 2185 AND Fcrls <= 0 AND P2ry13 <= 0 AND Foxf1a <= 10 AND P2ry12 <= 0 AND Fam25c > 0 AND Krt14 <= 0	Fat
Rule1482	Fosl1 > 1 AND Coro1a <= 60 AND Tspan8 <= 3 AND Ins2 <= 0 AND Cldn7 <= 5 AND Krt14 <= 8 AND Ctsd <= 2185 AND Fcrls <= 0 AND P2ry13 <= 0 AND Foxf1a <= 10 AND P2ry12 <= 0 AND Krt5 <= 3 AND Krt17 > 0 AND Cx3cr1 <= 0 AND B4galnt2 <= 0 AND Foxf1a <= 0 AND Krt6a <= 0 AND Chodl <= 12 AND Calm4 <= 0 AND Mbp <= 5 AND Anxa8 <= 0 AND Ptprcap <= 0 AND Slc2a5 <= 0 AND Lpcat2 <= 0 AND Gpx2 <= 0 AND Fosl1 <= 320…	Mammary
Rule1483	Foxf1a > 1 AND Pitx2 <= 0 AND Fosl1 <= 0 AND Anxa8 > 12 AND Scel <= 50 AND Ptprc <= 0 AND Epcam <= 21 AND B4galnt2 <= 3 AND Krt13 <= 1	Trachea
Rule1484	Fosl1 > 1 AND Coro1a <= 60 AND Tspan8 <= 3 AND Cldn7 <= 5 AND Krt14 <= 8 AND Ins2 <= 0 AND Ctsd <= 2185 AND Fcrls <= 0 AND P2ry13 <= 0 AND Klk1 > 0 AND Klk1 > 3	Trachea
Rule1485	Fosl1 > 1 AND Coro1a <= 60 AND Tspan8 <= 3 AND Cldn7 <= 5 AND Krt14 <= 8 AND Ins2 <= 0 AND Foxf1a <= 10 AND B4galnt2 <= 0 AND Fcrls <= 0 AND Ttr <= 0 AND Sycn > 0	Mammary
Rule1486	Foxf1a > 1 AND Pitx2 <= 0 AND Fosl1 <= 0 AND Tmem119 > 5 AND Cpa1 > 2	Muscle
Rule1487	Foxf1a > 1 AND Pitx2 <= 0 AND Fosl1 <= 0 AND Tmem119 > 5 AND Krt19 > 11 AND C1qb <= 1 AND Ckmt1 <= 2	Mammary
Rule1488	Foxf1a > 1 AND Pitx2 <= 0 AND Fosl1 <= 0 AND Tmem119 > 5 AND Laptm5 > 4 AND Lgals4 <= 7	Lung
Rule1489	Foxf1a > 1 AND Pitx2 <= 0 AND Fosl1 <= 0 AND Tmem119 > 5 AND Trem2 <= 0 AND P2ry13 <= 0 AND Tspan8 > 28 AND Lgmn <= 147	Lung
Rule1490	Foxf1a > 1 AND Pitx2 <= 0 AND Fosl1 <= 0 AND Tmem119 > 5 AND Trem2 <= 0 AND Tspan8 > 40 AND Ptprc <= 0	Lung
Rule1491	Foxf1a > 1 AND Pitx2 <= 0 AND Fosl1 <= 0 AND Tmem119 > 5 AND Trem2 <= 0 AND P2ry13 <= 0 AND Anxa8 <= 11 AND Tspan8 <= 2 AND Ckmt1 > 4	Trachea
Rule1492	Fosl1 > 1 AND Coro1a <= 60 AND Tspan8 <= 3 AND Cldn7 <= 5 AND Krt14 <= 8 AND Ins2 <= 0 AND Ctsd <= 2185 AND Fcrls <= 0 AND P2ry13 <= 0 AND Klk1 > 0 AND Pitx2 <= 0 AND Chga <= 0 AND Foxf1a <= 11 AND Tcf7 <= 13 AND Chodl <= 131 AND Krt6a <= 0 AND Krt15 > 0	Mammary
Rule1493	Foxf1a > 1 AND Pitx2 <= 0 AND Fosl1 <= 0 AND Tmem119 > 5 AND Trem2 <= 0 AND P2ry13 <= 0 AND Gpr34 > 1 AND Csf1r > 0	Trachea
Rule1494	Foxf1a > 1 AND Pitx2 <= 0 AND Fosl1 <= 0 AND Tmem119 > 5 AND Gpr34 <= 1 AND P2ry13 <= 0 AND Tspan8 <= 2 AND Cldn7 > 2	Trachea
Rule1495	Fosl1 > 1 AND Coro1a <= 60 AND Tspan8 <= 3 AND Cldn7 <= 5 AND Krt14 <= 8 AND Ins2 <= 0 AND B4galnt2 <= 0 AND Fcrls <= 0 AND Ttr <= 0 AND Foxf1a <= 10 AND Cd3d > 0 AND P2ry12 <= 0	Muscle
Rule1496	Foxf1a > 1 AND Pitx2 <= 0 AND Fosl1 <= 0 AND Tm4sf4 > 1 AND C1qa <= 0	Trachea
Rule1497	Fosl1 > 1 AND Rac2 <= 27 AND Tspan8 <= 3 AND Cldn7 <= 5 AND Krt14 <= 8 AND Ins2 <= 0 AND B4galnt2 <= 0 AND Fcrls <= 0 AND Ttr <= 0 AND Foxf1a <= 10 AND P2ry12 <= 0 AND Ccr9 > 0 AND Krt13 <= 0	Trachea
Rule1498	Fosl1 > 1 AND Coro1a <= 52 AND Tspan8 <= 3 AND Cldn7 <= 5 AND Krt14 <= 8 AND Ins2 <= 0 AND Ctsd <= 2185 AND Fcrls <= 0 AND Ttr <= 0 AND Serpinb5 > 0 AND Krt8 <= 0 AND Krt17 <= 0 AND Ctsd > 280	Muscle
Rule1499	Fosl1 > 1 AND Coro1a <= 52 AND Tspan8 <= 3 AND Serpinb5 <= 0 AND Ins2 <= 0 AND Ctsd <= 2185 AND Fcrls <= 0 AND Lgals7 > 0 AND 2210415F13Rik <= 0 AND 2610528A11Rik <= 0 AND Dsp <= 0 AND Krt8 <= 0 AND Krt6a <= 0 AND C1qa > 0 AND Dmkn <= 18	Muscle
Rule1500	Fosl1 > 1 AND Coro1a <= 52 AND Tspan8 <= 3 AND Serpinb5 <= 0 AND Ins2 <= 0 AND Krt14 > 7 AND Krt8 <= 1 AND Fosl1 <= 51	Muscle
Rule1501	Foxf1a > 1 AND Pitx2 <= 0 AND Fosl1 <= 0 AND Chodl > 2 AND Gpx2 <= 0 AND P2ry13 <= 0 AND C1qc <= 0 AND Coro1a <= 0 AND Pnlip <= 1 AND Asb5 <= 0 AND Cldn7 <= 0 AND C1qa <= 0 AND Tcf7 <= 2	Trachea
Rule1502	Fosl1 > 1 AND Coro1a <= 52 AND Tspan8 <= 3 AND Serpinb5 <= 0 AND Ins2 <= 0 AND Ctsd <= 2185 AND Fcrls <= 0 AND Lgals7 > 0 AND 2210415F13Rik <= 0 AND Dsp <= 0 AND Krt6a <= 0 AND Krt8 <= 0 AND Gpr34 <= 0 AND Lgmn > 0	Fat
Rule1503	Fosl1 > 1 AND Coro1a <= 52 AND Tspan8 <= 3 AND Serpinb5 <= 0 AND Ins2 <= 0 AND Ctsd <= 2185 AND Fcrls <= 0 AND Klk1 > 0 AND Prss32 <= 0 AND Krt17 <= 0 AND Tcf7 <= 8 AND Col17a1 <= 0 AND Cldn3 <= 15 AND B4galnt2 <= 0 AND Chodl <= 131 AND Epcam <= 0 AND 2210415F13Rik <= 0 AND Hexb > 0	Mammary
Rule1504	Fosl1 > 1 AND Coro1a <= 52 AND Tspan8 <= 3 AND Serpinb5 <= 0 AND Ins2 <= 0 AND Ctsd <= 2185 AND Fcrls <= 0 AND Klk1 > 0 AND Prss32 <= 0 AND Krt17 <= 0 AND Tcf7 <= 8 AND Mbp <= 0 AND Krt14 <= 0 AND Tmem119 <= 58	Trachea
Rule1505	Fosl1 > 1 AND Coro1a <= 52 AND Tspan8 <= 3 AND Serpinb5 <= 0 AND Ins2 <= 0 AND Ctsd <= 2185 AND Klk1 > 0 AND Prss32 <= 0 AND Krt17 <= 0	Mammary
Rule1506	Foxf1a > 1 AND Pitx2 <= 0 AND Fosl1 <= 0 AND Lypd3 <= 0 AND Calml3 > 4 AND Anxa8 <= 2	Trachea
Rule1507	Cd3e > 1 AND Ins2 <= 0 AND Krt8 <= 0 AND Trim29 <= 0 AND Cdh17 <= 0 AND Csf1r <= 0 AND Krt5 <= 0 AND Cd3e <= 130 AND Coro1a > 24 AND Cd8b1 <= 1352 AND C1qb <= 0 AND Hpgds <= 3 AND Tspan8 <= 0 AND Cldn3 <= 0 AND Pcsk1n <= 0 AND Krt19 <= 0 AND Cd79b <= 0 AND Ctsd > 606 AND Krt15 <= 0 AND Cd3e <= 113 AND Cd3d > 49 AND Lgals4 <= 1 AND Tmem119 <= 0 AND Cd3e > 14	Spleen
Rule1508	Foxf1a > 1 AND Pitx2 <= 0 AND Fosl1 <= 0 AND Tmem119 > 5 AND Gpr34 <= 1 AND P2ry13 <= 0 AND Resp18 <= 1 AND 1190003J15Rik > 2	Trachea
Rule1509	Fosl1 > 1 AND Coro1a <= 52 AND Tspan8 <= 3 AND Serpinb5 <= 0 AND Ins2 <= 0 AND B4galnt2 > 0 AND C1qc <= 0 AND Krt8 <= 0 AND 2210415F13Rik <= 0	Fat
Rule1510	Fosl1 > 1 AND Coro1a <= 52 AND Tspan8 <= 3 AND Serpinb5 <= 0 AND B4galnt2 > 0 AND C1qc <= 0	Trachea
Rule1511	Fosl1 > 1 AND Coro1a <= 52 AND Tspan8 <= 3 AND Serpinb5 <= 0 AND Ins2 <= 0 AND Ctsd <= 2185 AND Fcrls <= 0 AND Ttr <= 0 AND Oit1 > 0 AND Tmem45b <= 0 AND Krt8 > 0	Mammary
Rule1512	Foxf1a > 1 AND Pitx2 <= 0 AND Fosl1 <= 0 AND Tmem119 > 5 AND Gpr34 <= 1 AND P2ry13 <= 0 AND Resp18 <= 1 AND Cldn3 > 3	Trachea
Rule1513	Foxf1a > 1 AND Pitx2 <= 0 AND Fosl1 <= 0 AND Lypd3 <= 0 AND Ckmt1 > 1 AND Ins2 <= 9 AND Pcsk1n <= 0	Lung
Rule1514	Fosl1 > 1 AND Coro1a <= 52 AND Tspan8 <= 3 AND Serpinb5 <= 0 AND Ins2 <= 0 AND Ctsd <= 2185 AND Fcrls <= 0 AND Ttr <= 0 AND Cdh17 > 0	Trachea
Rule1515	Fosl1 > 1 AND Coro1a <= 52 AND Tspan8 <= 3 AND Serpinb5 <= 0 AND Ins2 <= 0 AND Ctsd <= 2185 AND Ttr <= 0 AND Fcrls <= 0 AND Foxf1a > 10 AND Rnase1 > 88	Lung
Rule1516	Fosl1 > 1 AND Coro1a <= 52 AND Tspan8 <= 3 AND Serpinb5 <= 0 AND Ins2 <= 0 AND Ctsd <= 2185 AND Ttr <= 0 AND Fcrls <= 0 AND Dsp > 0 AND Siglech <= 0 AND Fosl1 > 27 AND Lgals4 <= 0	Trachea
Rule1517	Fosl1 > 1 AND Coro1a <= 52 AND Tspan8 <= 3 AND Serpinb5 <= 0 AND Ins2 <= 0 AND Ctsd <= 2185 AND Ttr <= 0 AND Fcrls <= 0 AND Chodl > 57 AND C1qa <= 0 AND Csf1r <= 0 AND Cx3cr1 <= 0 AND Mbp <= 0	Trachea
Rule1518	Fosl1 > 1 AND Coro1a <= 52 AND Tspan8 <= 3 AND Serpinb5 <= 0 AND Ins2 <= 0 AND Ctsd <= 2185 AND Ttr <= 0 AND Fcrls <= 0 AND Epcam > 0 AND Chga <= 0 AND Krt5 <= 2 AND Anxa8 <= 22 AND Cdhr5 <= 0 AND Tmem45b <= 0 AND Ptprcap <= 0 AND Coro1a <= 0 AND Rac2 <= 1 AND Ckmt1 <= 0 AND Cldn3 <= 0 AND Krt8 <= 3 AND Krt15 <= 0 AND Pigr <= 0 AND Tmem119 > 0	Mammary
Rule1519	Foxf1a > 1 AND Pitx2 <= 0 AND Ckmt1 > 1 AND Lypd3 <= 0 AND Pcsk1n <= 0	Pancreas
Rule1520	Foxf1a > 1 AND Pitx2 <= 0 AND Fosl1 <= 0 AND Lypd3 <= 0 AND Tmem119 > 5 AND Gpr34 <= 1 AND P2ry13 <= 0 AND Serpinb5 > 0 AND Krt5 <= 0 AND Ptprcap <= 0	Trachea
Rule1521	Foxf1a > 1 AND Pitx2 <= 0 AND Fosl1 <= 0 AND Lypd3 <= 0 AND Tmem119 > 5 AND Gpr34 <= 1 AND Serpinb5 <= 0 AND P2ry13 <= 0 AND Resp18 > 1	Trachea
Rule1522	Foxf1a > 1 AND Pitx2 <= 0 AND Fosl1 <= 0 AND Lypd3 <= 0 AND Chodl <= 0 AND Tmem119 > 5 AND Gpr34 <= 1 AND Serpinb5 <= 0 AND P2ry13 <= 0 AND Ptprc <= 0 AND Krt13 > 0 AND Krt15 <= 0	Trachea
Rule1523	Foxf1a > 1 AND Pitx2 <= 0 AND Fosl1 <= 0 AND Lypd3 <= 0 AND Chodl <= 0 AND Tmem119 > 5 AND Gpr34 <= 1 AND Serpinb5 <= 0 AND Krt13 <= 0 AND P2ry13 <= 0 AND Ptprc <= 0 AND Lgmn > 150 AND Prss2 <= 1 AND Lgals7 <= 0 AND Krt14 <= 3 AND Trem2 <= 0 AND Cdhr5 <= 0 AND Anxa8 <= 0 AND Gpr34 <= 0 AND Cd79b <= 0 AND Krt5 <= 1 AND Try5 <= 0 AND Gpx2 <= 0 AND P2ry12 <= 0 AND Lgals4 <= 2 AND Laptm5 <= 1 AND 119…	Lung
Rule1524	Fosl1 > 1 AND Coro1a <= 52 AND Tspan8 <= 3 AND Serpinb5 <= 0 AND Ins2 <= 0 AND Csf1r > 44 AND P2ry13 <= 0 AND Lgals4 <= 1 AND Chodl <= 114	Fat
Rule1525	Fosl1 > 1 AND Coro1a <= 52 AND Tspan8 <= 3 AND Serpinb5 <= 0 AND Ins2 <= 0 AND Ctsd <= 2186 AND Ttr <= 0 AND Foxf1a > 84 AND Cela2a <= 0 AND Rac2 <= 0 AND Ctsd <= 1171 AND Slc2a5 <= 0 AND Tmem45b <= 0 AND Cx3cr1 <= 0 AND Guca2a <= 0 AND Foxf1a > 113	Trachea
Rule1526	Fosl1 > 1 AND Coro1a <= 52 AND Tspan8 <= 3 AND Serpinb5 <= 0 AND Ins2 <= 0 AND Ctsd <= 2186 AND Ttr <= 0 AND Fcrls <= 0 AND Cx3cr1 > 0 AND Dsc3 <= 0 AND S100a14 <= 0 AND Cx3cr1 <= 6 AND Rac2 <= 0 AND C1qb <= 1 AND Dmkn <= 0 AND P2ry12 <= 0	Muscle
Rule1527	Fosl1 > 1 AND Coro1a <= 52 AND Tspan8 <= 3 AND Serpinb5 <= 0 AND Ins2 <= 0 AND Ctsd <= 2186 AND Ttr <= 0 AND Fcrls <= 0 AND Cx3cr1 > 0 AND Coro1a <= 0 AND Mbp <= 0 AND Gpr34 <= 0 AND P2ry12 <= 0	Mammary
Rule1528	Fosl1 > 1 AND Coro1a <= 52 AND Tspan8 <= 3 AND Serpinb5 <= 0 AND Ins2 <= 0 AND Ctsd <= 2186 AND Ttr <= 0 AND Cx3cr1 <= 0 AND Fcrls <= 0 AND Cela2a > 0 AND Foxf1a <= 95 AND Fosl1 <= 71	Trachea
Rule1529	Fosl1 > 1 AND Coro1a <= 52 AND Ctrb1 > 0 AND Cela2a <= 1 AND Lgmn <= 17	Fat
Rule1530	Fosl1 > 1 AND Coro1a <= 52 AND Tspan8 <= 3 AND Serpinb5 <= 0 AND Ins2 <= 0 AND Ctsd <= 2186 AND Cx3cr1 <= 0 AND Fcrls <= 0 AND Cela2a > 0 AND Foxf1a <= 32	Muscle
Rule1531	Fosl1 > 1 AND Coro1a <= 52 AND Tspan8 <= 3 AND Serpinb5 <= 0 AND Ins2 <= 0 AND Ctsd <= 2186 AND Cx3cr1 <= 0 AND Fcrls <= 0 AND Ptprc <= 0 AND Foxf1a <= 84 AND Cd79b <= 0 AND Sfn > 33 AND P2ry12 <= 0	Muscle
Rule1532	Fosl1 > 1 AND Coro1a <= 52 AND Tspan8 <= 3 AND Serpinb5 <= 0 AND Ins2 <= 0 AND Ctsd <= 2186 AND Cx3cr1 <= 0 AND Fcrls <= 0 AND Ptprc <= 0 AND Foxf1a <= 84 AND Cd79b <= 0 AND Trim29 > 0 AND Tmem119 <= 355 AND Dsp <= 0 AND Mbp > 0	Muscle
Rule1533	Foxf1a > 1 AND Pitx2 <= 0 AND Fosl1 <= 0 AND Tmem119 > 5 AND Gpr34 <= 1 AND Serpinb5 <= 0 AND P2ry13 <= 0 AND B4galnt2 <= 3 AND Cd3d <= 0 AND Tspan8 <= 2 AND Krt13 <= 0 AND Trp63 <= 0 AND Tmem119 > 1853	Lung
Rule1534	Fosl1 > 1 AND Trim29 <= 1 AND Coro1a <= 52 AND Tspan8 <= 2 AND Serpinb5 > 0 AND Krt8 <= 0 AND Krt17 <= 1	Fat
Rule1535	Fosl1 > 1 AND Trim29 <= 1 AND Coro1a <= 52 AND Tspan8 <= 2 AND Ins2 <= 0 AND Cx3cr1 <= 0 AND Foxf1a <= 12 AND Ttr <= 0 AND Fcrls <= 0 AND Ctsd > 2314 AND Gc <= 0 AND Fosl1 <= 61	Fat
Rule1536	Fosl1 > 1 AND Trim29 <= 1 AND Coro1a <= 52 AND Tspan8 <= 2 AND Ins2 <= 0 AND Ctsd > 3114 AND Sfn <= 0 AND Foxf1a <= 121	Mammary
Rule1537	Fosl1 > 1 AND Trim29 <= 1 AND Coro1a <= 52 AND Tspan8 <= 2 AND Ctsd > 3114 AND Sfn <= 0	Bladder
Rule1538	Fosl1 > 1 AND Trim29 <= 1 AND Coro1a <= 52 AND Tspan8 <= 2 AND Ins2 <= 0 AND Cx3cr1 <= 0 AND Asb5 > 0 AND Cd3d <= 0 AND Laptm5 <= 0 AND C1qb <= 0 AND Krt15 <= 0	Muscle
Rule1539	Fosl1 > 1 AND Trim29 <= 1 AND Coro1a <= 52 AND Tspan8 <= 2 AND Asb5 <= 0 AND Ins2 <= 0 AND Krt14 > 6 AND Serpinb5 <= 0 AND Krt14 > 15	Brain Neurons
Rule1540	Fosl1 > 1 AND Trim29 <= 1 AND Coro1a <= 52 AND Tspan8 <= 2 AND Asb5 <= 0 AND Ins2 <= 0 AND Cx3cr1 <= 0 AND Fcrls <= 0 AND C1qc <= 0 AND Slc2a5 > 0	Muscle
Rule1541	Fosl1 > 1 AND Trim29 <= 1 AND Coro1a <= 52 AND Tspan8 <= 2 AND Asb5 <= 0 AND Ins2 <= 0 AND Cx3cr1 <= 0 AND Fcrls <= 0 AND C1qc <= 0 AND Foxf1a > 92 AND Fosl1 > 4 AND Guca2a > 0	Trachea
Rule1542	Fosl1 > 1 AND Trim29 <= 1 AND Foxf1a > 113 AND Tmem45b <= 0 AND Hexb > 0 AND Tmem119 <= 0	Lung
Rule1543	Fosl1 > 1 AND Trim29 <= 1 AND Coro1a <= 52 AND Tspan8 <= 2 AND Asb5 <= 0 AND Ins2 <= 0 AND Cx3cr1 <= 0 AND Fcrls <= 0 AND C1qc <= 0 AND Phgr1 > 0 AND Perp <= 0 AND Ptprcap <= 0 AND Hexb <= 184	Mammary
Rule1544	Fosl1 > 1 AND Trim29 <= 1 AND Coro1a <= 52 AND Tspan8 <= 2 AND Asb5 <= 0 AND Ins2 <= 0 AND Cx3cr1 <= 0 AND Fcrls <= 0 AND Phgr1 <= 0 AND C1qc <= 0 AND Ptprc <= 0 AND Tcf7 > 3 AND Anxa8 <= 32 AND Lgmn <= 15 AND Krt5 <= 0 AND Coro1a <= 0	Mammary
Rule1545	Fosl1 > 1 AND Trim29 <= 1 AND Coro1a <= 52 AND Tspan8 <= 2 AND Asb5 <= 0 AND Ins2 <= 0 AND Tcf7 > 3 AND 2210415F13Rik <= 0 AND Tmem119 > 4	Trachea
Rule1546	Fosl1 > 1 AND Trim29 <= 1 AND Cd79b > 5 AND Krt14 <= 0	Lung
Rule1547	Fosl1 > 1 AND Trim29 <= 1 AND Tspan8 <= 2 AND Ptprc <= 25 AND Asb5 <= 0 AND Ins2 <= 0 AND Tcf7 > 3 AND 2210415F13Rik <= 0 AND Hexb <= 4	Brain Neurons
Rule1548	Fosl1 > 1 AND Trim29 <= 1 AND Coro1a <= 52 AND Tspan8 <= 2 AND Asb5 <= 0 AND Ins2 <= 0 AND Cx3cr1 > 0 AND Dsc3 <= 0 AND Mbp <= 1 AND P2ry13 <= 0 AND Perp <= 0 AND Coro1a <= 0 AND Fcrls <= 0	Muscle
Rule1549	Fosl1 > 1 AND Trim29 <= 1 AND Coro1a <= 52 AND Tspan8 <= 2 AND Cx3cr1 <= 0 AND Asb5 <= 0 AND Ins2 <= 0 AND Fcrls <= 0 AND Phgr1 <= 0 AND C1qc <= 0 AND Ptprc <= 0 AND C1qa > 0 AND Perp <= 1 AND Krt8 <= 0 AND P2ry12 <= 1 AND Anxa8 <= 107 AND Mbp <= 6 AND Laptm5 <= 1 AND Krt15 <= 0	Muscle
Rule1550	Fosl1 > 1 AND Trim29 <= 1 AND Tspan8 <= 2 AND Ptprc <= 25 AND Cx3cr1 <= 0 AND Asb5 <= 0 AND Ins2 <= 0 AND Fcrls <= 0 AND Phgr1 > 0	Trachea
Rule1551	Fosl1 > 1 AND Trim29 <= 1 AND Tspan8 <= 2 AND Ptprc <= 25 AND Cx3cr1 <= 0 AND Asb5 <= 0 AND Ins2 <= 0 AND Fcrls <= 0 AND C1qc <= 0 AND P2ry12 <= 0 AND Dsp > 0 AND Lgals4 <= 0	Fat
Rule1552	Fosl1 > 1 AND Trim29 <= 1 AND Tspan8 <= 2 AND Ptprc <= 25 AND Cx3cr1 <= 0 AND Asb5 <= 0 AND Ins2 <= 0 AND Fcrls <= 0 AND Ctsd > 2250 AND C1qc > 0	Kidney
Rule1553	Fosl1 > 1 AND Trim29 <= 1 AND Tspan8 <= 2 AND Ptprc <= 25 AND Cx3cr1 <= 0 AND Asb5 <= 0 AND Ins2 <= 0 AND Fcrls <= 0 AND Ttr <= 0 AND Coro1a <= 0 AND Ptprcap > 0 AND Krt17 <= 0	Trachea
Rule1554	Fosl1 > 1 AND Trim29 <= 1 AND Tspan8 <= 2 AND Ptprc <= 25 AND Cx3cr1 <= 0 AND Asb5 <= 0 AND Ins2 <= 0 AND Fcrls <= 0 AND Ttr <= 0 AND Coro1a <= 0 AND Pitx2 > 0 AND Laptm5 <= 0 AND Ctsd > 220	Trachea
Rule1555	Fosl1 > 1 AND Trim29 <= 1 AND Tspan8 <= 2 AND Ptprc <= 25 AND Cx3cr1 <= 0 AND Asb5 <= 0 AND Ins2 <= 0 AND Fcrls <= 0 AND Ttr <= 0 AND Pitx2 > 0 AND Laptm5 <= 0	Muscle
Rule1556	Fosl1 > 1 AND Pitx2 > 0 AND Cldn3 <= 0 AND Tspan8 > 2	Bladder
Rule1557	Fosl1 > 1 AND Trim29 <= 1 AND Scel > 3 AND C1qb > 0	Bladder
Rule1558	Fosl1 > 1 AND Trim29 <= 1 AND Ins2 <= 0 AND Ttr <= 0 AND Serpinb5 > 0 AND P2ry12 <= 0	Mammary
Rule1559	Fosl1 > 1 AND Serpinb5 <= 0 AND Ins2 <= 0 AND Cx3cr1 > 0 AND Fcrls <= 0 AND P2ry12 <= 0	Fat
Rule1560	Fosl1 > 1 AND Serpinb5 <= 0 AND Ins2 <= 0 AND Krt8 > 5 AND Laptm5 <= 0 AND Krt19 <= 1 AND Krt8 <= 620	Kidney
Rule1561	Fosl1 > 1 AND Serpinb5 <= 0 AND Ins2 <= 0 AND Cx3cr1 > 0 AND Csf1r <= 0 AND Fcrls <= 1	Muscle
Rule1562	Fosl1 > 1 AND Serpinb5 <= 0 AND Cx3cr1 > 0 AND Cx3cr1 <= 2 AND Tmem119 <= 221	Heart
Rule1563	Fosl1 > 1 AND Serpinb5 <= 0 AND Ins2 <= 0 AND Ptprc <= 0 AND Tspan8 <= 2 AND Fcrls <= 0 AND Coro1a <= 0 AND Krt6a <= 1 AND Fxyd3 <= 0 AND Anxa8 > 5 AND C1qa <= 0 AND C1qb <= 0 AND Laptm5 <= 0 AND Krt14 <= 1	Muscle
Rule1564	Fosl1 > 1 AND Serpinb5 <= 0 AND Ins2 <= 0 AND Klk1 > 0 AND Lgals4 <= 0	Bladder
Rule1565	Fosl1 > 1 AND Serpinb5 <= 0 AND Foxf1a > 135 AND Tmem45b <= 0	Bladder
Rule1566	Fosl1 > 1 AND Serpinb5 <= 0 AND Ins2 <= 0 AND Rac2 <= 111 AND Csf1r > 44 AND P2ry13 <= 0	Muscle
Rule1567	Fosl1 > 1 AND Serpinb5 <= 0 AND Rac2 <= 3 AND Ins2 <= 0 AND Ttr > 0 AND Tspan1 <= 0	Muscle
Rule1568	Fosl1 > 1 AND Serpinb5 <= 0 AND Ins2 <= 0 AND Fcrls <= 0 AND Ptprc <= 0 AND Anxa8 > 3 AND Siglech <= 0 AND Dmkn <= 0	Trachea
Rule1569	Fosl1 > 1 AND Serpinb5 <= 0 AND Rac2 <= 3 AND Ins2 <= 0 AND Fcrls <= 0 AND Ptprc <= 0 AND Tmem119 > 25 AND Perp <= 9 AND Pax9 <= 0 AND Trim29 <= 0 AND P2ry13 > 0	Muscle
Rule1570	Fosl1 > 1 AND Serpinb5 <= 0 AND Rac2 <= 3 AND Ins2 <= 0 AND Fcrls <= 0 AND Ptprc <= 0 AND Tmem119 > 25 AND Perp <= 9 AND Pax9 <= 0 AND Trim29 <= 0 AND C1qc <= 1 AND Chga > 0 AND Hexb > 150	Trachea
Rule1571	Fosl1 > 1 AND Serpinb5 <= 0 AND Rac2 <= 3 AND Ins2 <= 0 AND Fcrls <= 0 AND Ptprc <= 0 AND Tspan8 > 21 AND Dmkn <= 15	Trachea
Rule1572	Fosl1 > 1 AND Serpinb5 <= 0 AND Ins2 <= 0 AND Rac2 <= 41 AND Fcrls <= 0 AND Ptprc <= 0 AND Cd79b > 0 AND Aqp3 <= 0 AND Dmkn <= 18	Trachea
Rule1573	Fosl1 > 1 AND Serpinb5 <= 0 AND Ins2 <= 0 AND Rac2 <= 41 AND Fcrls <= 0 AND Ptprc <= 0 AND Fxyd3 <= 0 AND Tmem119 > 25 AND Pax9 <= 0 AND Trim29 <= 0 AND Krt6a > 0 AND Hexb > 26	Muscle
Rule1574	Fosl1 > 1 AND Serpinb5 <= 0 AND Ins2 <= 0 AND Rac2 <= 41 AND Fcrls <= 0 AND Tmem119 > 25 AND Perp <= 9 AND Pax9 <= 0 AND Cldn3 <= 11 AND Cd3g <= 0 AND C1qc <= 1 AND Krt6a <= 0 AND Krt5 <= 0 AND P2ry12 <= 1 AND Chga <= 0 AND Aqp3 <= 1 AND Lgals4 > 9	Muscle
Rule1575	Fosl1 > 1 AND Serpinb5 <= 0 AND Ins2 <= 0 AND Rac2 <= 41 AND Fcrls <= 0 AND Tmem119 > 25 AND Perp <= 9 AND Pax9 <= 0 AND Cldn3 <= 11 AND Cd3g <= 0 AND C1qc <= 1 AND Aqp3 <= 1 AND Krt6a <= 0 AND Krt5 <= 0 AND P2ry12 <= 1 AND Chga <= 0 AND Mobp <= 0 AND Coro1a > 0 AND Ctsd <= 186	Mammary
Rule1576	Fosl1 > 1 AND Serpinb5 <= 0 AND Ins2 <= 0 AND Rac2 <= 41 AND Fcrls <= 0 AND Tmem119 > 25 AND Perp <= 9 AND Pax9 <= 0 AND Cldn3 <= 11 AND Cd3g <= 0 AND C1qc <= 1 AND Aqp3 <= 1 AND Coro1a > 0 AND Fosl1 > 20	Fat
Rule1577	Fosl1 > 1 AND Serpinb5 <= 0 AND Coro1a <= 46 AND Tspan8 > 60 AND Prss32 <= 0 AND Epcam <= 0	Kidney
Rule1578	Fosl1 > 1 AND Serpinb5 <= 0 AND Rac2 <= 3 AND Ins2 <= 0 AND Fcrls <= 0 AND Fxyd3 <= 0 AND Mbp > 9 AND Foxf1a <= 0 AND Cldn7 <= 0 AND Coro1a <= 0 AND Perp <= 0 AND Laptm5 <= 0	Mammary
Rule1579	Fosl1 > 1 AND Serpinb5 <= 0 AND Rac2 <= 3 AND Ins2 <= 0 AND Fcrls <= 0 AND Mbp > 9 AND Cldn7 <= 0 AND Foxf1a <= 0	Fat
Rule1580	Fosl1 > 1 AND Serpinb5 <= 0 AND Rac2 <= 3 AND Ins2 <= 0 AND Fcrls <= 0 AND Fxyd3 <= 0 AND Tmem119 > 12 AND Prss2 <= 0 AND Krt6a > 0	Fat
Rule1581	Fosl1 > 1 AND Serpinb5 <= 0 AND Rac2 <= 3 AND Ins2 <= 0 AND Fcrls <= 0 AND Chga > 0	Muscle
Rule1582	Fosl1 > 1 AND Serpinb5 <= 0 AND Rac2 <= 3 AND Ins2 <= 0 AND Fcrls <= 0 AND Fxyd3 <= 0 AND Tmem119 > 25 AND Cd3g <= 0 AND Coro1a <= 0 AND C1qc > 1	Muscle
Rule1583	Fosl1 > 1 AND Serpinb5 <= 0 AND Rac2 <= 3 AND Ins2 <= 0 AND Fcrls <= 0 AND Fxyd3 <= 0 AND Tmem119 > 25 AND Cd3g <= 0 AND Coro1a <= 0 AND C1qa > 0 AND P2ry12 <= 1 AND Krt14 <= 0	Mammary
Rule1584	Fosl1 > 1 AND Serpinb5 <= 0 AND Rac2 <= 3 AND Ins2 <= 0 AND Fcrls <= 0 AND Fxyd3 <= 0 AND Tmem119 > 25 AND C1qa > 0	Fat
Rule1585	Fosl1 > 1 AND Serpinb5 <= 0 AND Rac2 <= 3 AND Ins2 <= 0 AND Fcrls <= 0 AND Krt5 > 3	Muscle
Rule1586	Fosl1 > 1 AND Serpinb5 <= 0 AND Rac2 <= 3 AND Ins2 <= 0 AND Fcrls <= 0 AND Cdh1 > 0 AND Rac2 <= 0	Mammary
Rule1587	Fosl1 > 1 AND Krt15 > 7 AND Gpr34 <= 859 AND Hexb <= 4	Brain Neurons
Rule1588	Fosl1 > 1 AND Serpinb5 > 0 AND Ttr <= 0 AND Lgals7 <= 2	Brain Microglia
Rule1589	Fosl1 > 1 AND Coro1a <= 46 AND Ins2 <= 0 AND Fcrls <= 0 AND Lypd3 > 0 AND Krt8 <= 1	Muscle
Rule1590	Fosl1 > 1 AND Coro1a <= 46 AND Tspan8 > 47 AND Prss32 > 0	Trachea
Rule1591	Fosl1 > 1 AND Coro1a <= 46 AND Ins2 <= 0 AND Fcrls <= 0 AND Fxyd3 <= 0 AND P2ry12 <= 0 AND Krt13 > 0 AND Krt14 <= 9	Trachea
Rule1592	Fosl1 > 1 AND Ptprc > 25 AND Lgmn <= 21 AND Ctsd <= 409	Marrow
Rule1593	Fosl1 > 1 AND Ins2 <= 0 AND Fcrls <= 0 AND Fxyd3 <= 0 AND Cdhr5 <= 0 AND P2ry12 <= 0 AND Lpcat2 > 43	Mammary
Rule1594	Fosl1 > 1 AND Ins2 <= 0 AND Fcrls <= 0 AND Fxyd3 <= 0 AND Cdhr5 > 0	Mammary
Rule1595	Fosl1 > 1 AND Ins2 <= 0 AND Fcrls <= 0 AND Fxyd3 <= 0 AND P2ry12 <= 0 AND Tmem119 > 12 AND Pkp1 <= 0 AND Prss2 <= 0 AND Calm4 <= 0 AND Cd3g <= 0 AND Pax9 <= 16 AND Chodl <= 1 AND Aqp3 <= 1 AND Lpcat2 > 22	Muscle
Rule1596	Fosl1 > 1 AND Ins2 <= 0 AND Fcrls <= 0 AND Fxyd3 <= 0 AND P2ry12 <= 0 AND Tmem119 > 12 AND Pkp1 <= 0 AND Prss2 <= 0 AND Calm4 <= 0 AND Cd3g <= 0 AND Pax9 <= 16 AND Chodl <= 1 AND Aqp3 <= 1 AND 2610528A11Rik > 0 AND Perp <= 0	Mammary
Rule1597	Fosl1 > 1 AND Ins2 <= 0 AND Fcrls <= 0 AND Fxyd3 <= 0 AND P2ry12 <= 0 AND Tmem119 > 12 AND Pkp1 <= 0 AND 2610528A11Rik <= 0 AND Prss2 <= 0 AND Calm4 <= 0 AND Cd3g <= 0 AND Pax9 <= 16 AND Chodl <= 1 AND Aqp3 <= 1 AND Krt5 <= 0 AND Mobp <= 0 AND Perp <= 8 AND Rac2 <= 0 AND Tcf7 <= 0 AND Krt14 > 0 AND Ctsd <= 385	Mammary
Rule1598	Fosl1 > 1 AND Cx3cr1 > 0 AND Fcrls <= 1	Lung
Rule1599	Fosl1 > 1 AND Ins2 <= 0 AND Fcrls <= 0 AND Fxyd3 <= 0 AND P2ry12 <= 0 AND C1qb > 0 AND Cldn3 <= 0 AND Tmem119 > 370 AND Fosl1 > 49	Mammary
Rule1600	Fosl1 > 1 AND Ins2 <= 0 AND Fcrls <= 0 AND Fxyd3 <= 0 AND P2ry12 <= 0 AND C1qb > 0 AND Cldn3 <= 0 AND Tmem119 <= 121 AND Laptm5 <= 1 AND C1qb <= 1 AND P2ry13 <= 0 AND C1qc <= 0 AND Krt19 <= 0 AND Tmem119 <= 11	Muscle
Rule1601	Fosl1 > 1 AND Ins2 <= 0 AND Fcrls <= 0 AND Fxyd3 <= 0 AND C1qb > 1 AND Krt8 <= 0 AND C1qc > 0	Trachea
Rule1602	Fosl1 > 1 AND Ins2 <= 0 AND Csf1r > 2 AND Krt8 <= 1 AND C1qa <= 0 AND Tmem119 <= 185	Trachea
Rule1603	Fosl1 > 1 AND Ins2 <= 0 AND Fcrls <= 0 AND Fxyd3 <= 0 AND Cd79b <= 0 AND P2ry12 <= 0 AND C1qb > 1 AND Hexb <= 48	Bladder
Rule1604	Fosl1 > 1 AND Ins2 <= 0 AND Fcrls <= 0 AND Fxyd3 <= 0 AND Cd79b <= 0 AND P2ry12 <= 0 AND Klk10 <= 3 AND Tmem119 > 12 AND Pkp1 <= 0 AND 2610528A11Rik <= 0 AND Calm4 <= 0 AND Krt5 > 0 AND Dmkn <= 0	Trachea
Rule1605	Fosl1 > 1 AND Ins2 <= 0 AND Fcrls <= 0 AND Fxyd3 <= 0 AND Cd79b <= 0 AND P2ry12 <= 0 AND Klk10 <= 3 AND Tmem119 > 12 AND Pkp1 <= 0 AND 2610528A11Rik <= 0 AND Calm4 <= 0 AND Coro1a <= 0 AND Chodl <= 1 AND Mobp > 0 AND Laptm5 <= 0	Muscle
Rule1606	Fosl1 > 1 AND Ins2 <= 0 AND Fcrls <= 0 AND Fxyd3 <= 0 AND Cd79b <= 0 AND P2ry12 <= 0 AND Klk10 <= 3 AND Tmem119 > 12 AND Pkp1 <= 0 AND 2610528A11Rik <= 0 AND Mobp <= 0 AND Calm4 <= 0 AND Coro1a <= 0 AND Chodl <= 1 AND Aqp3 <= 1 AND Krt14 > 0 AND Rac2 <= 0 AND Lgals4 <= 0 AND Hexb > 36	Trachea
Rule1607	Fosl1 > 1 AND Ins2 <= 0 AND Fcrls <= 0 AND Fxyd3 <= 0 AND Cd79b <= 0 AND P2ry12 <= 0 AND Tmem119 > 12 AND Mobp <= 0 AND Pkp1 <= 0 AND 2610528A11Rik <= 0 AND Calm4 <= 0 AND Coro1a <= 0 AND Chodl <= 1 AND Aqp3 <= 1 AND Perp <= 8 AND Rac2 <= 0 AND Krt5 <= 0 AND Tcf7 <= 0 AND Hexb <= 212 AND Epcam > 0	Mammary
Rule1608	Fosl1 > 1 AND Ins2 <= 0 AND Fcrls <= 0 AND Cldn7 > 1 AND Lgmn <= 96	Trachea
Rule1609	Fosl1 > 1 AND Ins2 <= 0 AND Fcrls <= 0 AND Fxyd3 <= 0 AND Cd79b <= 0 AND P2ry12 <= 0 AND Tmem119 > 12 AND Mobp <= 0 AND Pkp1 <= 0 AND 2610528A11Rik <= 0 AND Calm4 <= 0 AND Coro1a <= 0 AND Chodl <= 1 AND Aqp3 <= 1 AND Perp <= 8 AND Rac2 <= 0 AND Tcf7 <= 0 AND Krt5 <= 0 AND Laptm5 > 0 AND Krt14 <= 0	Muscle
Rule1610	Fosl1 > 1 AND Ins2 <= 0 AND Fcrls <= 0 AND Fxyd3 <= 0 AND Cd79b <= 0 AND P2ry12 <= 0 AND Klk10 <= 3 AND Tmem119 > 12 AND Mobp <= 0 AND Pkp1 <= 0 AND 2610528A11Rik <= 0 AND Calm4 <= 0 AND Coro1a <= 0 AND Chodl <= 1 AND Aqp3 <= 1 AND Perp <= 8 AND Rac2 <= 0 AND Krt5 <= 0 AND Laptm5 <= 0 AND C1qb <= 0 AND Hexb <= 134 AND Cldn7 <= 0 AND Sfn <= 3 AND Mbp <= 0 AND Aqp3 <= 0 AND Krt8 <= 0 AND 2210415F13…	Mammary
Rule1611	Fosl1 > 1 AND Ins2 <= 0 AND Fcrls <= 0 AND Fxyd3 <= 0 AND Cd79b <= 0 AND P2ry12 <= 0 AND Csf1r > 0 AND Dmbt1 <= 0 AND P2ry13 <= 0 AND Fosl1 > 10	Muscle
Rule1612	Fosl1 > 1 AND Ins2 <= 0 AND Csf1r > 2 AND Krt14 <= 0	Mammary
Rule1613	Fosl1 > 1 AND Ins2 <= 0 AND Fcrls <= 0 AND Fxyd3 <= 0 AND Cd79b <= 0 AND P2ry12 <= 0 AND Pax9 <= 0 AND C1qb > 0 AND Tmem119 <= 490 AND Hexb <= 163	Muscle
Rule1614	Fosl1 > 1 AND Ins2 <= 0 AND Fcrls <= 0 AND Fxyd3 <= 0 AND Cd79b <= 0 AND P2ry12 <= 0 AND Pax9 > 0	Muscle
Rule1615	Fosl1 > 1 AND Ins2 <= 0 AND Fcrls <= 0 AND Fxyd3 <= 0 AND Cd79b <= 0 AND P2ry12 <= 0 AND C1qb > 0 AND Ctsd <= 825	Mammary
Rule1616	Fosl1 > 1 AND Ins2 <= 0 AND Fcrls <= 0 AND Fxyd3 <= 0 AND Cd79b <= 0 AND C1qb > 0 AND Krt15 <= 0 AND Mbp <= 0	Mammary
Rule1617	Fosl1 > 1 AND Ins2 <= 0 AND Csf1r > 1 AND Hexb <= 129	Trachea
Rule1618	Fosl1 > 1 AND Ins2 <= 0 AND Fcrls <= 0 AND C1qb > 0 AND Krt15 > 0	Fat
Rule1619	Fosl1 > 1 AND Ins2 <= 0 AND Fcrls <= 0 AND P2ry12 > 0 AND Lgals4 <= 0 AND Krt8 <= 0 AND Gpr34 <= 0 AND Rac2 <= 0 AND Mbp <= 0 AND Tmem119 <= 207	Mammary
Rule1620	Fosl1 > 1 AND Ins2 <= 0 AND Fcrls <= 0 AND P2ry12 > 0 AND Krt8 <= 0 AND Lgals4 <= 0	Muscle
Rule1621	Fosl1 > 1 AND Cldn7 > 3 AND Krt8 <= 6	Fat
Rule1622	Fosl1 > 1 AND Ins2 <= 0 AND Fcrls <= 0 AND P2ry12 <= 0 AND Fxyd3 <= 0 AND Cd79b <= 0 AND Tmem119 > 25 AND 2610528A11Rik <= 0 AND Mobp <= 0 AND Krt5 <= 0 AND Chodl <= 1 AND Aqp3 <= 1 AND Perp <= 8 AND Tcf7 <= 0 AND Rac2 <= 0 AND Krt8 > 0	Mammary
Rule1623	Fosl1 > 1 AND Ins2 <= 0 AND Ptprc > 0 AND Siglech <= 0 AND Ptprcap <= 0 AND Krt15 <= 1 AND C1qb <= 0 AND Krt6a <= 0	Fat
Rule1624	Fosl1 > 1 AND Ins2 <= 0 AND Fcrls <= 0 AND P2ry12 <= 0 AND Fxyd3 <= 0 AND Cd79b > 0 AND Krt14 <= 0	Bladder
Rule1625	Fosl1 > 1 AND Ins2 <= 0 AND Perp > 21 AND Lgmn <= 60	Trachea
Rule1626	Fosl1 > 1 AND Perp > 25 AND Hexb <= 0	Fat
Rule1627	Fosl1 > 1 AND Ins2 <= 0 AND Fxyd3 <= 0 AND Rac2 <= 2 AND Dsc3 > 0 AND Mbp <= 3	Fat
Rule1628	Fosl1 > 1 AND Ins2 <= 0 AND Fxyd3 <= 0 AND Trim29 > 0 AND Trim29 <= 1	Muscle
Rule1629	Fosl1 > 1 AND Ins2 <= 0 AND Fxyd3 <= 0 AND Rac2 <= 2 AND Fcrls <= 0 AND Tspan1 > 0 AND Epcam > 0	Mammary
Rule1630	Fosl1 > 1 AND Ttr > 0 AND Serpinb5 <= 0	Trachea
[truncated: 5,783 more rows]
